# Supplementary material for: Ciliary neuropeptidergic signaling dynamically regulates excitatory synapses in postnatal neocortical pyramidal neurons
Source: eLife. 2021 Mar 2;10:e65427. doi: 10.7554/eLife.65427 (PMC7952091; doi:10.7554/eLife.65427)
Supplement: Figure 1—figure supplement 1—source data 1. [file elife-65427-fig1-figsupp1-data1.xlsx]

## Sheet: SuppFig1_A_B
Image	Area	Mean	Min	Max	IntDen	RawIntDen	Length	Treatment	Marker	Dissociation	NormInt
14	1.181	5768.66	2218	13498	6812.98	392269	4.35	CTL	AC3	VC2732	0.587604
16	1.32	10516.2	2229	29419	13881.2	799233	4.878	CTL	AC3	VC2732	1.19722
17	0.729	15628.5	4487	32990	11400.4	656398	2.636	CTL	AC3	VC2732	0.98326
18	1.146	7842.94	2901	22195	8990.34	517634	4.219	CTL	AC3	VC2732	0.775396
19	0.834	13709.9	5097	23458	11429.5	658075	3.032	CTL	AC3	VC2732	0.985772
21	0.556	8486.25	4143	17853	4716.49	271560	1.977	CTL	AC3	VC2732	0.406787
23	1.389	10252.9	4370	27791	14245.8	820228	5.138	CTL	AC3	VC2732	1.22867
24	2.154	9753.76	1790	26613	21006.2	1209466	8.042	CTL	AC3	VC2732	1.81173
25	1.389	8541.23	2429	21779	11867.6	683298	5.137	CTL	AC3	VC2732	1.02355
14	1.181	12625.6	3767	27131	14911.3	858544	4.35	CTL	ARL13b	VC2732	0.756685
16	1.32	9555.01	2435	23740	12612.4	726181	4.878	CTL	ARL13b	VC2732	0.640026
17	0.729	26791	13818	49135	19543	1125220	2.636	CTL	ARL13b	VC2732	0.991723
18	1.146	14539	4245	40079	16666	959576	4.219	CTL	ARL13b	VC2732	0.845731
19	0.834	19092.8	8512	26728	15917.1	916455	3.032	CTL	ARL13b	VC2732	0.807726
21	0.556	40897.3	17100	63918	22729.9	1308715	1.977	CTL	ARL13b	VC2732	1.15345
23	1.389	11184.6	3365	31101	15540.5	894770	5.138	CTL	ARL13b	VC2732	0.788614
24	2.154	21685.3	9530	62876	46702.5	2688974	8.042	CTL	ARL13b	VC2732	2.36995
25	1.389	9163.35	2338	26935	12732	733068	5.137	CTL	ARL13b	VC2732	0.646096
1	0.764	12753.2	1405	27621	9745.94	561139	2.769	shARL13b_2	AC3	VC2732	0.840565
2	2.536	14268.7	3038	41692	36181.7	2083224	9.486	shARL13b_2	AC3	VC2732	3.12059
3	0.243	19978.8	8710	27610	4857.92	279703	0.792	shARL13b_2	AC3	VC2732	0.418985
4	0.486	9910.25	4541	17392	4819.43	277487	1.712	shARL13b_2	AC3	VC2732	0.415665
6	2.188	10981.8	2416	29582	24032.5	1383713	8.165	shARL13b_2	AC3	VC2732	2.07275
7	0.313	13012.7	8710	17578	4068.1	234228	1.053	shARL13b_2	AC3	VC2732	0.350865
10	1.251	8673.64	3030	20208	10846.4	624502	4.61	shARL13b_2	AC3	VC2732	0.935481
26	0.174	60433.1	42907	65535	10496.1	604331	0.527	shARL13b_2	AC3	VC2732	0.905265
27	0.382	18007	7926	30094	6880.44	396153	1.318	shARL13b_2	AC3	VC2732	0.593422
28	0.452	22133	5960	31524	9994.63	575458	1.582	shARL13b_2	AC3	VC2732	0.862015
30	1.077	15577.3	2333	36675	16774	965794	3.954	shARL13b_2	AC3	VC2732	1.44672
31	0.417	11617.3	1787	20699	4842.51	278816	1.45	shARL13b_2	AC3	VC2732	0.417656
32	0.313	12811.7	8468	18501	4005.28	230611	1.054	shARL13b_2	AC3	VC2732	0.345447
33	0.591	14578.7	6893	26797	8608.97	495676	2.107	shARL13b_2	AC3	VC2732	0.742504
1	0.764	21928.8	4288	37261	16758	964868	2.769	shARL13b_2	ARL13b	VC2732	0.850395
2	2.536	3797.5	1119	11980	9629.5	554435	9.486	shARL13b_2	ARL13b	VC2732	0.488656
3	0.243	23610.8	10869	36427	5741.06	330551	0.792	shARL13b_2	ARL13b	VC2732	0.291334
4	0.486	20829	6339	40769	10129.3	583211	1.712	shARL13b_2	ARL13b	VC2732	0.514018
6	2.188	5363.58	1423	15172	11737.6	675811	8.165	shARL13b_2	ARL13b	VC2732	0.595632
7	0.313	15546	9361	23763	4860.09	279828	1.053	shARL13b_2	ARL13b	VC2732	0.246629
10	1.251	13723.6	5444	39081	17161.4	988099	4.61	shARL13b_2	ARL13b	VC2732	0.87087
26	0.174	2678.6	2005	3514	465.223	26786	0.527	shARL13b_2	ARL13b	VC2732	0.0236081
27	0.382	5298.95	2625	8930	2024.72	116577	1.318	shARL13b_2	ARL13b	VC2732	0.102746
28	0.452	6810.46	3498	9927	3075.41	177072	1.582	shARL13b_2	ARL13b	VC2732	0.349153
30	1.077	12459.1	3275	27066	13416.2	772463	3.954	shARL13b_2	ARL13b	VC2732	0.507185
31	0.417	19003	8533	30052	7921.12	456072	1.45	shARL13b_2	ARL13b	VC2732	0.851211
32	0.313	11969.3	5541	17006	3741.93	215448	1.054	shARL13b_2	ARL13b	VC2732	0.189887
33	0.591	21748.9	8423	41552	12843.1	739464	2.107	shARL13b_2	ARL13b	VC2732	0.651733
MAX_Image 75_Airyscan Processing.czi:0001-0311-0313:2	1.864	12201	10527	15952	22737.8	12530414	5.817	CTL	AC3	VC2904	1.23335
Image 74_Airyscan Processing_Maximum intensity projection.czi:0001-0166-0523:c:2/3 - Image 74_Airyscan Processing_Maximum intensity proje	1.575	12401.3	10706	15883	19533.1	10764346	5.249	CTL	AC3	VC2904	1.05952
Image 60_Airyscan Processing_Maximum intensity projection.czi:0001-0479-0359:c:2/3 - Image 60_Airyscan Processing_Maximum intensity proje	1.23	11720.9	10529	13389	14420.3	7946794	4.771	CTL	AC3	VC2904	0.782189
Image 59_Airyscan Processing_Maximum intensity projection.czi:0001-0404-0451:c:2/3 - Image 59_Airyscan Processing_Maximum intensity proje	0.858	13951.3	10571	19674	11974.5	6598963	2.669	CTL	AC3	VC2904	0.649524
Image 73_Airyscan Processing_Maximum intensity projection.czi:0001-0341-0541:c:2/3 - Image 73_Airyscan Processing_Maximum intensity proje	1.366	12415.9	10516	15234	16965.1	9349196	4.869	CTL	AC3	VC2904	0.920225
Image 58_Airyscan Processing_Maximum intensity projection.czi:c:2/3 - Image 58_Airyscan Processing_Maximum intensity proje	1.305	13423.5	10990	17417	17513.7	9651485	3.875	CTL	AC3	VC2904	0.949979
Image 57_Airyscan Processing_Maximum intensity projection.czi:c:2/3 - Image 57_Airyscan Processing_Maximum intensity proje	2.257	11476.4	10416	14019	25906.5	14276613	6.982	CTL	AC3	VC2904	1.40522
MAX_Image 75_Airyscan Processing.czi:0001-0311-0313:1	1.864	11181.8	10178	13976	20838.4	11483688	5.817	CTL	ARL13b	VC2904	1.23859
Image 74_Airyscan Processing_Maximum intensity projection.czi:0001-0166-0523:c:1/3 - Image 74_Airyscan Processing_Maximum intensity proje	1.575	11042.4	10230	13140	17392.6	9584785	5.249	CTL	ARL13b	VC2904	1.03378
Image 60_Airyscan Processing_Maximum intensity projection.czi:0001-0479-0359:c:1/3 - Image 60_Airyscan Processing_Maximum intensity proje	1.23	11066	10257	13057	13614.5	7502733	4.771	CTL	ARL13b	VC2904	0.809218
Image 59_Airyscan Processing_Maximum intensity projection.czi:0001-0404-0451:c:1/3 - Image 59_Airyscan Processing_Maximum intensity proje	0.858	11548.9	10396	14162	9912.53	5462629	2.669	CTL	ARL13b	VC2904	0.58918
Image 73_Airyscan Processing_Maximum intensity projection.czi:0001-0341-0541:c:1/3 - Image 73_Airyscan Processing_Maximum intensity proje	1.366	11621.8	10436	14115	15880.1	8751248	4.869	CTL	ARL13b	VC2904	0.943879
Image 58_Airyscan Processing_Maximum intensity projection.czi:c:1/3 - Image 58_Airyscan Processing_Maximum intensity proje	1.305	11649.2	10417	15159	15198.7	8375768	3.875	CTL	ARL13b	VC2904	0.903381
Image 57_Airyscan Processing_Maximum intensity projection.czi:c:1/3 - Image 57_Airyscan Processing_Maximum intensity proje	2.257	11045.2	10154	13375	24933.1	13740206	6.982	CTL	ARL13b	VC2904	1.48197
Image 64_Airyscan Processing_Maximum intensity projection.czi:c:2/3 - Image 64_Airyscan Processing_Maximum intensity proje	0.564	14195.5	10964	17174	8011.15	4414809	1.418	shARL13b_2	AC3	VC2904	0.434542
Image 65_Airyscan Processing_Maximum intensity projection.czi:c:2/3 - Image 65_Airyscan Processing_Maximum intensity proje	1.252	13558.1	10351	19505	16975.9	9355113	4.233	shARL13b_2	AC3	VC2904	0.920807
Image 67_Airyscan Processing_Maximum intensity projection.czi:c:2/3 - Image 67_Airyscan Processing_Maximum intensity proje	0.775	14299	10884	18122	11079.4	6105668	2.998	shARL13b_2	AC3	VC2904	0.60097
Image 66_Airyscan Processing_Maximum intensity projection.czi:c:2/3 - Image 66_Airyscan Processing_Maximum intensity proje	0.905	12203.9	10815	14222	11050.5	6089728	3.15	shARL13b_2	AC3	VC2904	0.599401
Image 68_Airyscan Processing_Maximum intensity projection.czi:c:2/3 - Image 68_Airyscan Processing_Maximum intensity proje	0.325	15535.9	11362	22294	5046.3	2780930	0.749	shARL13b_2	AC3	VC2904	0.273722
Image 70_Airyscan Processing_Maximum intensity projection.czi:c:2/3 - Image 70_Airyscan Processing_Maximum intensity proje	0.818	16730.3	11910	21475	13691.9	7545353	2.179	shARL13b_2	AC3	VC2904	0.742676
Image 61_Airyscan Processing_Maximum intensity projection.czi:c:2/3 - Image 61_Airyscan Processing_Maximum intensity proje	1.581	11966.6	10156	17137	18913.6	10422947	6.908	shARL13b_2	AC3	VC2904	1.02591
Image 62_Airyscan Processing_Maximum intensity projection.czi:c:2/3 - Image 62_Airyscan Processing_Maximum intensity proje	0.887	12001.2	10832	14136	10649.2	5868580	3.736	shARL13b_2	AC3	VC2904	0.577634
Image 64_Airyscan Processing_Maximum intensity projection.czi:c:1/3 - Image 64_Airyscan Processing_Maximum intensity proje	0.564	11726.5	10339	13251	6617.77	3646942	1.418	shARL13b_2	ARL13b	VC2904	0.393346
Image 65_Airyscan Processing_Maximum intensity projection.czi:c:1/3 - Image 65_Airyscan Processing_Maximum intensity proje	1.252	10651	10104	13366	13335.9	7349195	4.233	shARL13b_2	ARL13b	VC2904	0.792658
Image 67_Airyscan Processing_Maximum intensity projection.czi:c:1/3 - Image 67_Airyscan Processing_Maximum intensity proje	0.775	11399.6	10406	12562	8832.86	4867639	2.998	shARL13b_2	ARL13b	VC2904	0.525006
Image 66_Airyscan Processing_Maximum intensity projection.czi:c:1/3 - Image 66_Airyscan Processing_Maximum intensity proje	0.905	10794.7	10215	11521	9774.47	5386544	3.15	shARL13b_2	ARL13b	VC2904	0.580974
Image 68_Airyscan Processing_Maximum intensity projection.czi:c:1/3 - Image 68_Airyscan Processing_Maximum intensity proje	0.325	12135.2	10395	14873	3941.68	2172192	0.749	shARL13b_2	ARL13b	VC2904	0.234285
Image 70_Airyscan Processing_Maximum intensity projection.czi:c:1/3 - Image 70_Airyscan Processing_Maximum intensity proje	0.818	12493.9	10786	14728	10224.9	5634764	2.179	shARL13b_2	ARL13b	VC2904	0.607746
Image 61_Airyscan Processing_Maximum intensity projection.czi:c:1/3 - Image 61_Airyscan Processing_Maximum intensity proje	1.581	10615.2	10080	12521	16777.6	9245831	6.908	shARL13b_2	ARL13b	VC2904	0.997223
Image 62_Airyscan Processing_Maximum intensity projection.czi:c:1/3 - Image 62_Airyscan Processing_Maximum intensity proje	0.887	10424.1	10108	11146	9249.74	5097376	3.736	shARL13b_2	ARL13b	VC2904	0.549785
Image 25_Airyscan Processing_Maximum intensity projection.czi:c:2/3 - Image 25_Airyscan Processing_Maximum intensity proje	0.697	14497.2	11145	19799	10101.8	5566935	1.57	CTL	AC3	VC2905	0.963848
Image 24_Airyscan Processing_Maximum intensity projection.czi:c:2/3 - Image 24_Airyscan Processing_Maximum intensity proje	0.924	11957.8	10713	14181	11044.7	6086531	3.323	CTL	AC3	VC2905	1.05381
Image 23_Airyscan Processing_Maximum intensity projection.czi:c:2/3 - Image 23_Airyscan Processing_Maximum intensity proje	0.7	14698.8	11115	17612	10295.6	5673750	1.758	CTL	AC3	VC2905	0.982342
Image 25_Airyscan Processing_Maximum intensity projection.czi:c:1/3 - Image 25_Airyscan Processing_Maximum intensity proje	0.697	13479.9	10633	17802	9392.91	5176274	1.57	CTL	ARL13b	VC2905	0.974027
Image 24_Airyscan Processing_Maximum intensity projection.czi:c:1/3 - Image 24_Airyscan Processing_Maximum intensity proje	0.924	11149.1	10144	13987	10297.7	5674908	3.323	CTL	ARL13b	VC2905	1.06786
Image 23_Airyscan Processing_Maximum intensity projection.czi:c:1/3 - Image 23_Airyscan Processing_Maximum intensity proje	0.7	13191	10767	15992	9239.48	5091725	1.758	CTL	ARL13b	VC2905	0.958117
Image 40_Airyscan Processing_Maximum intensity projection.czi:c:2/3 - Image 40_Airyscan Processing_Maximum intensity proje	0.653	14852.4	11059	18162	9702.49	5346877	1.713	shARL13b_2	AC3	VC2905	0.925748
Image 15_Airyscan Processing_Maximum intensity projection.czi:c:2/3 - Image 15_Airyscan Processing_Maximum intensity proje	0.341	12463.2	10707	13699	4251.79	2343090	0.579	shARL13b_2	AC3	VC2905	0.405678
Image 14_Airyscan Processing_Maximum intensity projection.czi:c:2/3 - Image 14_Airyscan Processing_Maximum intensity proje	0.784	10995	20859	23554	8585.62	4731391	2.76	shARL13b_2	AC3	VC2905	0.819184
Image 13_Airyscan Processing_Maximum intensity projection.czi:c:2/3 - Image 13_Airyscan Processing_Maximum intensity proje	1.145	11104.1	10175	13110	12714.4	7006703	3.791	shARL13b_2	AC3	VC2905	1.21313
Image 40_Airyscan Processing_Maximum intensity projection.czi:c:1/3 - Image 40_Airyscan Processing_Maximum intensity proje	0.653	12114.9	10437	14711	7914.17	4361366	1.713	shARL13b_2	ARL13b	VC2905	0.820685
Image 15_Airyscan Processing_Maximum intensity projection.czi:c:1/3 - Image 15_Airyscan Processing_Maximum intensity proje	0.341	10368.2	10112	10728	3537.06	1949216	0.579	shARL13b_2	ARL13b	VC2905	0.366787
Image 14_Airyscan Processing_Maximum intensity projection.czi:c:2/3 - Image 14_Airyscan Processing_Maximum intensity proje	0.784	10385.7	20309	21312	8122.9	4476395	2.76	shARL13b_2	ARL13b	VC2905	0.84233
Image 13_Airyscan Processing_Maximum intensity projection.czi:c:1/3 - Image 13_Airyscan Processing_Maximum intensity proje	1.145	10411.6	10061	11055	11921.5	6569726	3.791	shARL13b_2	ARL13b	VC2905	1.23623

## Sheet: SuppFig1_D_E
Image	Nodes	Lengths	Treatment	Dissociation
Image 44_Airyscan Processing_Maximum intensity projection.czi:0945-0764	22	1663.55	CTL	VC2865
Image 27_Airyscan Processing_Maximum intensity projection.czi:0273-0686	13	1814.23	CTL	VC2865
Image 43_Airyscan Processing_Maximum intensity projection.czi:0264-0562	22	1890.55	CTL	VC2865
Image 36_Airyscan Processing_Maximum intensity projection.czi:0948-1633	23	2047.14	CTL	VC2865
Image 24_Airyscan Processing_Maximum intensity projection.czi:0003-0975-0348:c:3/3 - Image 24_Airyscan Processing_Maximum intensity proje	19	1867.18	shARL13b_2	VC2865
Image 25_Airyscan Processing_Maximum intensity projection.czi:0003-0467-0253:c:3/3 - Image 25_Airyscan Processing_Maximum intensity proje	22	1339.88	shARL13b_2	VC2865
Image 26_Airyscan Processing_Maximum intensity projection.czi:1052-0487	21	1193.51	shARL13b_2	VC2865
Image 40_Airyscan Processing_Maximum intensity projection.czi:0365-0815	33	2145.02	shARL13b_2	VC2865
Image 29_Airyscan Processing_Maximum intensity projection.czi:1340-0852	29	2552.18	CTL	VC2866
Image 31_Maximum intensity projection.czi:0001-1317-1429:c:1/2 t:1/16 - Image 31_Maximum intensity projection #1	12	1565.27	CTL	VC2866
Image 32_Airyscan Processing_Maximum intensity projection.czi:0727-0485	23	1497.47	CTL	VC2866
Image 33_Airyscan Processing_Maximum intensity projection.czi:0542-0908	26	1503.69	CTL	VC2866
Image 35_Airyscan Processing_Maximum intensity projection.czi:0506-1039	19	1883.72	CTL	VC2866
Image 36_Airyscan Processing_Maximum intensity projection.czi:0746-0737	21	1367.08	CTL	VC2866
Image 37_Airyscan Processing_Maximum intensity projection.czi:1493-0753	16	1381.22	CTL	VC2866
Image 44_Airyscan Processing_Maximum intensity projection.czi:1012-0985	27	1852.01	shARL13b_2	VC2866
Image 47_Airyscan Processing_Maximum intensity projection.czi:1006-1096	32	2198.67	shARL13b_2	VC2866
Image 48_Airyscan Processing_Maximum intensity projection.czi:1364-1147	15	1504.24	shARL13b_2	VC2866
Image 49_Airyscan Processing_Maximum intensity projection.czi:1028-0950	21	1417.33	shARL13b_2	VC2866
Image 45_Airyscan Processing_Maximum intensity projection.czi:1781-0430	29	2687.93	shARL13b_2	VC2866
Image 46_Airyscan Processing_Maximum intensity projection.czi:0807-0893	15	1339.26	shARL13b_2	VC2866
Image 38_Airyscan Processing_Maximum intensity projection.czi:0953-1592	28	1792.1	shIFT88_CEP164	VC2866
Image 43_Airyscan Processing_Maximum intensity projection.czi:1320-0362	26	2046.86	shIFT88_CEP164	VC2866
Image 42_Airyscan Processing_Maximum intensity projection.czi:0921-1398	18	1961.94	shIFT88_CEP164	VC2866
Image 41_Airyscan Processing_Maximum intensity projection.czi:0575-1791	27	2487.01	shIFT88_CEP164	VC2866
Image 50_Airyscan Processing_Maximum intensity projection.czi:0542-0607	24	1389.79	CTL	VC2868
Image 51_Airyscan Processing_Maximum intensity projection.czi:0366-1144	20	2028.8	CTL	VC2868
Image 53_Airyscan Processing_Maximum intensity projection.czi:1282-1176	42	2317.58	CTL	VC2868
Image 57_Airyscan Processing_Maximum intensity projection.czi:1379-1657	19	2067.6	CTL	VC2868
Image 58_Airyscan Processing_Maximum intensity projection.czi:0360-0860	25	1884.98	CTL	VC2868
Image 61_Airyscan Processing_Maximum intensity projection.czi:1654-2055	31	2359.7	CTL	VC2868
Image 62_Airyscan Processing_Maximum intensity projection.czi:0451-1145	26	1830.65	shARL13b_2	VC2868
Image 68_Airyscan Processing_Maximum intensity projection.czi:0537-2063	21	1491.87	shARL13b_2	VC2868
Image 65_Airyscan Processing_Maximum intensity projection.czi:0422-1209	39	2952.6	shARL13b_2	VC2868
Image 63_Airyscan Processing_Maximum intensity projection.czi:1890-1532	16	1870.38	shARL13b_2	VC2868
Image 70_Airyscan Processing_Maximum intensity projection.czi:1448-1370	29	1966.41	shIFT88_CEP164	VC2868
Image 71_Airyscan Processing_Maximum intensity projection.czi:1350-0948	17	1852.21	shIFT88_CEP164	VC2868
Image 75_Airyscan Processing_Maximum intensity projection.czi:0304-0304	28	2406.81	shIFT88_CEP164	VC2868
Image 76_Airyscan Processing_Maximum intensity projection.czi:0713-0945	24	1298.18	shIFT88_CEP164	VC2868
Image 77_Airyscan Processing_Maximum intensity projection.czi:2104-1105	35	1668.41	shIFT88_CEP164	VC2868
Image 78_Airyscan Processing_Maximum intensity projection.czi:0921-1673	31	2322.28	shIFT88_CEP164	VC2868
Image 14_Airyscan Processing_Maximum intensity projection.czi:1272-1517	45	2136.32	CTL	VC2869
Image 15_Airyscan Processing_Maximum intensity projection.czi:1026-1585	36	2525.92	CTL	VC2869
Image 17_Airyscan Processing_Maximum intensity projection.czi:1836-0862	48	1382.55	CTL	VC2869
Image 20_Airyscan Processing_Maximum intensity projection.czi:1464-1333	45	2153.31	CTL	VC2869
Image 6_Airyscan Processing_Maximum intensity projection.czi:1011-1578	43	2270.54	shIFT88_CEP164	VC2869
Image 7_Airyscan Processing_Maximum intensity projection.czi:1752-0947	33	1732.26	shIFT88_CEP164	VC2869
Image 8_Airyscan Processing_Maximum intensity projection.czi:1622-0980	56	2431.68	shIFT88_CEP164	VC2869
Image 9_Airyscan Processing_Maximum intensity projection.czi:1111-0483	33	1616.88	shIFT88_CEP164	VC2869
Image 10_Airyscan Processing_Maximum intensity projection.czi:1239-0499	28	1227.38	shIFT88_CEP164	VC2869
Image 11_Airyscan Processing_Maximum intensity projection.czi:0909-0572	31	1375.73	shIFT88_CEP164	VC2869
Image 13_Airyscan Processing_Maximum intensity projection.czi:0482-1192	35	2339.36	shIFT88_CEP164	VC2869

## Sheet: SuppFig1_F_G_24h
Measurement	Image	Area	Mean	Min	Max	Perimeter	IntDen	RawIntDen	Channel	Length	Treatment	Dissociation	Marker	NormInt
1	MAX_Image 4_Airyscan Processing.czi:0002-0373-0374:1	0.356	11424.7	10120	14356	2.216	4065.94	1690849	1	0.694	CTL	VC2903	IFT88	0.281623
4	MAX_Image 12_Airyscan Processing.czi:0002-0310-0347:1	1.159	10666.9	10053	12278	7.189	12364.7	4789444	1	3.428	CTL	VC2903	IFT88	0.797717
6	MAX_Image 14_Airyscan Processing.czi:0002-0212-0308:1	1.425	10640.8	10049	13585	11.507	15163.9	5873712	1	5.588	CTL	VC2903	IFT88	0.97831
8	MAX_Image 15_Airyscan Processing.czi:0002-0155-0429:1	1.978	10870.6	10024	14344	11.741	21497.2	8326917	1	5.767	CTL	VC2903	IFT88	1.38691
10	MAX_Image 16_Airyscan Processing.czi:0002-0124-0281:1	1.903	10619.2	10050	12636	10.548	20204.8	7826317	1	4.869	CTL	VC2903	IFT88	1.30353
11	MAX_Image 5_Airyscan Processing.czi:0001-0322-0324:1	0.753	10995.4	10065	12615	4.683	8275.86	3441573	1	2.185	CTL	VC2903	IFT88	0.573219
13	MAX_Image 6_Airyscan Processing.czi:0002-0242-0182:1	1.097	10772.2	10061	12402	6.847	11812.1	4912138	1	3.208	CTL	VC2903	IFT88	0.818153
15	MAX_Image 9_Airyscan ProcessingSCALING.czi:0002-0193-0318:1	1.16	11031.1	10052	14818	7.224	12790.9	7048873	1	3.546	CTL	VC2903	IFT88	1.17404
18	MAX_Image 13_Airyscan Processing.czi:0002-0245-0338:1	2.491	10492.8	10017	13225	16.267	26140.7	10125599	1	7.923	CTL	VC2903	IFT88	1.68649
2	MAX_Image 4_Airyscan Processing.czi:0002-0373-0374:2	0.356	14550.2	10627	19472	2.216	5178.28	2153423	2	0.694	CTL	VC2903	AC3	0.30709
3	MAX_Image 12_Airyscan Processing.czi:0002-0310-0347:2	1.159	12717.7	10592	16468	7.189	14741.9	5710251	2	3.428	CTL	VC2903	AC3	0.814312
5	MAX_Image 14_Airyscan Processing.czi:0002-0212-0308:2	1.425	11585.2	10304	13745	11.507	16509.7	6395005	2	5.588	CTL	VC2903	AC3	0.911962
7	MAX_Image 15_Airyscan Processing.czi:0002-0155-0429:2	1.978	12722.7	10522	16511	11.741	25159.7	9745603	2	5.767	CTL	VC2903	AC3	1.38977
9	MAX_Image 16_Airyscan Processing.czi:0002-0124-0281:2	1.903	12250.7	10496	16243	10.548	23309	9028741	2	4.869	CTL	VC2903	AC3	1.28755
12	MAX_Image 5_Airyscan Processing.czi:0001-0322-0324:2	0.753	12707.7	10764	14908	4.683	9564.63	3977517	2	2.185	CTL	VC2903	AC3	0.567215
14	MAX_Image 6_Airyscan Processing.czi:0002-0242-0182:2	1.097	12716.8	10517	15475	6.847	13944.3	5798843	2	3.208	CTL	VC2903	AC3	0.826946
16	MAX_Image 9_Airyscan ProcessingSCALING.czi:0002-0193-0318:2	1.16	14499.6	11266	22236	7.224	16812.8	9265231	2	3.546	CTL	VC2903	AC3	1.32127
19	MAX_Image 13_Airyscan Processing.czi:0002-0245-0338:2	2.491	11436.9	10262	15266	16.267	28492.7	11036645	2	7.923	CTL	VC2903	AC3	1.57388
1	Image 1_Airyscan Processing_Maximum intensity projection.czi:c:1/3 - Image 1_Airyscan Processing_Maximum intensity projec	0.51	10918.4	10139	12218	3.04	5567.35	3068075	1	1.427	CTL	VC2904	IFT88	0.877399
5	Image 2_Airyscan Processing_Maximum intensity projection.czi:c:1/3 - Image 2_Airyscan Processing_Maximum intensity projec	0.387	12176.7	10297	15362	2.639	4706.45	2593647	1	1.247	CTL	VC2904	IFT88	0.741723
9	Image 3_Airyscan Processing_Maximum intensity projection.czi:c:1/3 - Image 3_Airyscan Processing_Maximum intensity projec	0.601	13554.9	10104	20336	4.346	8141.58	4486687	1	2.044	CTL	VC2904	IFT88	1.28309
14	Image 15_Airyscan Processing_Maximum intensity projection.czi:c:1/3 - Image 15_Airyscan Processing_Maximum intensity proje	0.541	22126.5	20281	24042	4.528	5973.53	3291912	1	2.012	CTL	VC2904	IFT88	0.941411
17	Image 16_Airyscan Processing_Maximum intensity projection.czi:c:1/3 - Image 16_Airyscan Processing_Maximum intensity proje	0.392	11148.4	10121	13052	3.126	4369.66	2408049	1	1.781	CTL	VC2904	IFT88	0.688647
20	Image 17_Airyscan Processing_Maximum intensity projection.czi:c:1/3 - Image 17_Airyscan Processing_Maximum intensity proje	0.466	11086.3	10168	13767	3.369	5170.13	2849172	1	1.546	CTL	VC2904	IFT88	0.814798
3	Image 18_Airyscan Processing_Maximum intensity projection.czi:0001-0455-0724:c:1/3 - Image 18_Airyscan Processing_Maximum intensity proje	0.89	10745.5	30162	34941	6.965	9579.3	5278993	1	2.551	CTL	VC2904	IFT88	1.50967
1	Image 19_Airyscan Processing_Maximum intensity projection.czi:c:1/3 - Image 19_Airyscan Processing_Maximum intensity proje	0.661	10982.8	10071	12150	4.786	7254.34	3997747	1	2.269	CTL	VC2904	IFT88	1.14326
2	Image 1_Airyscan Processing_Maximum intensity projection.czi:c:2/3 - Image 1_Airyscan Processing_Maximum intensity projec	0.51	11559.3	10545	12675	3.04	5894.13	3248155	2	1.427	CTL	VC2904	AC3	0.855766
6	Image 2_Airyscan Processing_Maximum intensity projection.czi:c:2/3 - Image 2_Airyscan Processing_Maximum intensity projec	0.387	14523.8	11016	19438	2.639	5613.6	3093561	2	1.247	CTL	VC2904	AC3	0.815036
8	Image 3_Airyscan Processing_Maximum intensity projection.czi:c:2/3 - Image 3_Airyscan Processing_Maximum intensity projec	0.601	14469.1	11009	20567	4.346	8690.65	4789270	2	2.044	CTL	VC2904	AC3	1.26179
12	Image 15_Airyscan Processing_Maximum intensity projection.czi:c:2/3 - Image 15_Airyscan Processing_Maximum intensity proje	0.541	24100.2	21550	27308	4.528	6529.88	3598507	2	2.012	CTL	VC2904	AC3	0.948071
18	Image 16_Airyscan Processing_Maximum intensity projection.czi:c:2/3 - Image 16_Airyscan Processing_Maximum intensity proje	0.392	11817.5	10660	13993	3.126	4631.93	2552581	2	1.781	CTL	VC2904	AC3	0.672509
21	Image 17_Airyscan Processing_Maximum intensity projection.czi:c:2/3 - Image 17_Airyscan Processing_Maximum intensity proje	0.466	13767	10601	20897	3.369	6420.31	3538128	2	1.546	CTL	VC2904	AC3	0.932163
3	Image 18_Airyscan Processing_Maximum intensity projection.czi:0001-0455-0724:c:1/3 - Image 18_Airyscan Processing_Maximum intensity proje	0.89	10900.4	30794	35351	6.965	9730.68	5362417	2	2.551	CTL	VC2904	AC3	1.41279
2	Image 19_Airyscan Processing_Maximum intensity projection.czi:c:2/3 - Image 19_Airyscan Processing_Maximum intensity proje	0.661	11489.7	10475	12734	4.786	7589.18	4182268	2	2.269	CTL	VC2904	AC3	1.10187
2	Image 12_Airyscan Processing_Maximum intensity projection.czi:c:1/3 - Image 12_Airyscan Processing_Maximum intensity proje	0.798	10541	10131	11526	5.708	8416.19	4638020	1	2.78	CTL	VC2905	IFT88	1.12874
1	Image 11_Airyscan Processing_Maximum intensity projection.czi:c:1/3 - Image 11_Airyscan Processing_Maximum intensity proje	0.695	10712.8	10116	13002	4.371	7445.34	4103004	1	1.952	CTL	VC2905	IFT88	0.998536
7	Image 10_Airyscan Processing_Maximum intensity projection.czi:c:1/3 - Image 10_Airyscan Processing_Maximum intensity proje	0.334	10339.4	10087	10838	3.385	3452.2	1902448	1	1.815	CTL	VC2905	IFT88	0.462993
11	Image 3_Airyscan Processing_Maximum intensity projection.czi:c:1/3 - Image 3_Airyscan Processing_Maximum intensity projec	1.065	10444.9	10069	11635	7.602	11125.6	6131129	1	3.597	CTL	VC2905	IFT88	1.49211
13	Image 2_Airyscan Processing_Maximum intensity projection.czi:c:1/3 - Image 2_Airyscan Processing_Maximum intensity projec	1.071	10699.7	10080	14049	9.219	11455.3	6312811	1	4.384	CTL	VC2905	IFT88	1.53633
16	Image 1_Airyscan Processing_Maximum intensity projection.czi:c:1/3 - Image 1_Airyscan Processing_Maximum intensity projec	0.276	10307.3	10089	10755	2.35	2842.95	1566703	1	0.938	CTL	VC2905	IFT88	0.381284
1	Image 12_Airyscan Processing_Maximum intensity projection.czi:c:2/3 - Image 12_Airyscan Processing_Maximum intensity proje	0.798	11900.8	10604	13665	5.708	9501.89	5236331	2	2.78	CTL	VC2905	AC3	1.09962
2	Image 11_Airyscan Processing_Maximum intensity projection.czi:c:2/3 - Image 11_Airyscan Processing_Maximum intensity proje	0.695	13719	11177	17634	4.371	9534.62	5254370	2	1.952	CTL	VC2905	AC3	1.10341
8	Image 10_Airyscan Processing_Maximum intensity projection.czi:c:2/3 - Image 10_Airyscan Processing_Maximum intensity proje	0.334	10803	10444	11194	3.385	3606.98	1987744	2	1.815	CTL	VC2905	AC3	0.417422
10	Image 3_Airyscan Processing_Maximum intensity projection.czi:c:2/3 - Image 3_Airyscan Processing_Maximum intensity projec	1.065	11719.9	10544	13938	7.602	12483.8	6879609	2	3.597	CTL	VC2905	AC3	1.4447
14	Image 2_Airyscan Processing_Maximum intensity projection.czi:c:2/3 - Image 2_Airyscan Processing_Maximum intensity projec	1.071	12414.5	10772	17297	9.219	13291.2	7324564	2	4.384	CTL	VC2905	AC3	1.53814
17	Image 1_Airyscan Processing_Maximum intensity projection.czi:c:2/3 - Image 1_Airyscan Processing_Maximum intensity projec	0.276	12428.5	10666	15329	2.35	3428.04	1889134	2	0.938	CTL	VC2905	AC3	0.396714
1	MAX_Image 17_Airyscan Processing.czi:0001-0184-0132:1	0.449	11026.5	10100	12775	2.622	4953.18	1918613	1	1.061	shIFT88_CEP164	VC2903	IFT88	0.319559
5	MAX_Image 18_Airyscan Processing.czi:0002-0479-0447:1	0.483	10926.2	10103	12928	3.315	5274.8	2043191	1	1.481	shIFT88_CEP164	VC2903	IFT88	0.340309
7	MAX_Image 27_Airyscan Processing.czi:0001-0377-0274:1	1.518	10198.7	10026	11039	11.496	15481.7	5996833	1	5.756	shIFT88_CEP164	VC2903	IFT88	0.998817
10	MAX_Image 31_Airyscan Processing.czi:0001-0317-0234:1	0.343	11376.3	10143	12904	2.158	3906.15	1513044	1	0.861	shIFT88_CEP164	VC2903	IFT88	0.252009
14	MAX_Image 28_Airyscan Processing.czi:0002-0384-0381:1	0.403	10597.5	10092	11745	2.653	4268.02	1653217	1	1.178	shIFT88_CEP164	VC2903	IFT88	0.275356
16	MAX_Image 19_Airyscan Processing.czi:0001-0400-0397:1	1.234	10170.6	10043	10777	8.609	12550.8	4861540	1	4.267	shIFT88_CEP164	VC2903	IFT88	0.809726
20	MAX_Image 21_Airyscan Processing.czi:0001-0260-0238:1	0.96	10575.6	10050	12609	6.678	10156.5	3934109	1	3.171	shIFT88_CEP164	VC2903	IFT88	0.655255
23	MAX_Image 23_Airyscan Processin.czi:0002-0278-0273:1	0.904	10209.7	10041	10486	6.173	9225.22	3573385	1	2.988	shIFT88_CEP164	VC2903	IFT88	0.595174
25	MAX_Image 20_Airyscan Processing.czi:0002-0190-0214:1	1.327	10728.8	10075	12379	8.893	14236.7	5514581	1	4.137	shIFT88_CEP164	VC2903	IFT88	0.918494
28	MAX_Image 22_Airyscan Processing.czi:0002-0526-0115:1	0.359	10835	10100	11752	2.213	3888.11	1506058	1	0.691	shIFT88_CEP164	VC2903	IFT88	0.250845
32	MAX_Image 24_Airyscan Processing.czi:0002-0115-0196:1	0.893	10552.6	10050	12434	5.765	9426.08	3651188	1	2.673	shIFT88_CEP164	VC2903	IFT88	0.608132
2	MAX_Image 17_Airyscan Processing.czi:0001-0184-0132:2	0.449	16008.4	11274	21496	2.622	7191.08	2785461	2	1.061	shIFT88_CEP164	VC2903	AC3	0.397222
4	MAX_Image 18_Airyscan Processing.czi:0002-0479-0447:2	0.483	12558	10740	15300	3.315	6062.62	2348354	2	1.481	shIFT88_CEP164	VC2903	AC3	0.334888
8	MAX_Image 27_Airyscan Processing.czi:0001-0377-0274:2	1.518	11518.2	10365	14466	11.496	17484.8	6772731	2	5.756	shIFT88_CEP164	VC2903	AC3	0.965827
11	MAX_Image 31_Airyscan Processing.czi:0001-0317-0234:2	0.343	15756.1	11465	20716	2.158	5410.01	2095565	2	0.861	shIFT88_CEP164	VC2903	AC3	0.298839
13	MAX_Image 28_Airyscan Processing.czi:0002-0384-0381:2	0.403	13839.1	10811	20052	2.653	5573.54	2158907	2	1.178	shIFT88_CEP164	VC2903	AC3	0.307872
17	MAX_Image 19_Airyscan Processing.czi:0001-0400-0397:2	1.234	10852.6	10174	12303	8.609	13392.5	5187562	2	4.267	shIFT88_CEP164	VC2903	AC3	0.739774
21	MAX_Image 21_Airyscan Processing.czi:0001-0260-0238:2	0.96	12216.2	10521	15148	6.678	11732.1	4544419	2	3.171	shIFT88_CEP164	VC2903	AC3	0.648058
22	MAX_Image 23_Airyscan Processin.czi:0002-0278-0273:2	0.904	10756.4	10229	11889	6.173	9719.2	3764726	2	2.988	shIFT88_CEP164	VC2903	AC3	0.53687
26	MAX_Image 20_Airyscan Processing.czi:0002-0190-0214:2	1.327	12373.7	10505	15483	8.893	16419.5	6360087	2	4.137	shIFT88_CEP164	VC2903	AC3	0.906982
29	MAX_Image 22_Airyscan Processing.czi:0002-0526-0115:2	0.359	16147.8	11126	20607	2.213	5794.63	2244548	2	0.691	shIFT88_CEP164	VC2903	AC3	0.320084
31	MAX_Image 24_Airyscan Processing.czi:0002-0115-0196:2	0.893	12152	10444	14647	5.765	10854.7	4204575	2	2.673	shIFT88_CEP164	VC2903	AC3	0.599595
4	Image 12_Airyscan Processing_Maximum intensity projection.czi:c:1/3 - Image 12_Airyscan Processing_Maximum intensity proje	0.441	11453.1	10256	13437	3.218	5050.26	2783114	1	1.447	shIFT88_CEP164	VC2904	IFT88	0.795906
7	Image 11_Airyscan Processing_Maximum intensity projection.czi:c:1/3 - Image 11_Airyscan Processing_Maximum intensity proje	0.363	11755.2	10497	13176	2.774	4266.23	2351050	1	1.435	shIFT88_CEP164	VC2904	IFT88	0.672346
10	Image 10_Airyscan Processing_Maximum intensity projection.czi:c:1/3 - Image 10_Airyscan Processing_Maximum intensity proje	0.512	11463.2	10155	13560	3.763	5865.95	3232628	1	1.872	shIFT88_CEP164	VC2904	IFT88	0.924457
13	Image 8_Airyscan Processing_Maximum intensity projection.czi:c:1/3 - Image 8_Airyscan Processing_Maximum intensity projec	0.272	11639.9	10232	13783	1.968	3168.28	1745989	1	1.019	shIFT88_CEP164	VC2904	IFT88	0.499313
16	Image 6_Airyscan Processing_Maximum intensity projection.czi:c:1/3 - Image 6_Airyscan Processing_Maximum intensity projec	0.307	11388.4	10208	12987	2.388	3492.47	1924639	1	0.992	shIFT88_CEP164	VC2904	IFT88	0.550402
20	Image 5_Airyscan Processing_Maximum intensity projection.czi:c:1/3 - Image 5_Airyscan Processing_Maximum intensity projec	0.523	11096.6	10170	13482	3.703	5799.18	3195828	1	1.722	shIFT88_CEP164	VC2904	IFT88	0.913933
1	MAX_Image 21_Airyscan Processing.tif:1	0.733	11087.8	10097	13185	5.441	8128.46	4479456	1	2.534	shIFT88_CEP164	VC2904	IFT88	1.28102
5	Image 20_Airyscan Processing_Maximum intensity projection.czi:c:1/3 - Image 20_Airyscan Processing_Maximum intensity proje	0.624	10363.9	10029	11658	4.747	6469.39	3565174	1	2.044	shIFT88_CEP164	VC2904	IFT88	1.01956
1	Image 22_Airyscan Processing_Maximum intensity projection.czi:c:1/3 - Image 22_Airyscan Processing_Maximum intensity proje	0.768	10744.5	10052	12024	5.97	8247.26	4544927	1	2.556	shIFT88_CEP164	VC2904	IFT88	1.29974
4	Image 23_Airyscan Processing_Maximum intensity projection.czi:c:1/3 - Image 23_Airyscan Processing_Maximum intensity proje	0.648	10926.1	10047	12793	4.958	7078.09	3900618	1	2.372	shIFT88_CEP164	VC2904	IFT88	1.11549
5	Image 12_Airyscan Processing_Maximum intensity projection.czi:c:2/3 - Image 12_Airyscan Processing_Maximum intensity proje	0.441	13313	10560	16822	3.218	5870.37	3235065	2	1.447	shIFT88_CEP164	VC2904	AC3	0.852317
8	Image 11_Airyscan Processing_Maximum intensity projection.czi:c:2/3 - Image 11_Airyscan Processing_Maximum intensity proje	0.363	13704.4	11322	16965	2.774	4973.62	2740880	2	1.435	shIFT88_CEP164	VC2904	AC3	0.722118
11	Image 10_Airyscan Processing_Maximum intensity projection.czi:c:2/3 - Image 10_Airyscan Processing_Maximum intensity proje	0.512	12715.7	10599	16152	3.763	6506.87	3585829	2	1.872	shIFT88_CEP164	VC2904	AC3	0.94473
14	Image 8_Airyscan Processing_Maximum intensity projection.czi:c:2/3 - Image 8_Airyscan Processing_Maximum intensity projec	0.272	12913.9	10944	15594	1.968	3515.05	1937087	2	1.019	shIFT88_CEP164	VC2904	AC3	0.510349
17	Image 6_Airyscan Processing_Maximum intensity projection.czi:c:2/3 - Image 6_Airyscan Processing_Maximum intensity projec	0.307	12816.5	10734	14524	2.388	3930.41	2165984	2	0.992	shIFT88_CEP164	VC2904	AC3	0.570655
21	Image 5_Airyscan Processing_Maximum intensity projection.czi:c:2/3 - Image 5_Airyscan Processing_Maximum intensity projec	0.523	11529.2	10449	13974	3.703	6025.27	3320423	2	1.722	shIFT88_CEP164	VC2904	AC3	0.874806
2	MAX_Image 21_Airyscan Processing.tif:2	0.733	11883.2	10597	13965	5.441	8711.6	4800815	2	2.534	shIFT88_CEP164	VC2904	AC3	1.26483
6	Image 20_Airyscan Processing_Maximum intensity projection.czi:c:2/3 - Image 20_Airyscan Processing_Maximum intensity proje	0.624	10784.5	10218	12420	4.747	6731.93	3709854	2	2.044	shIFT88_CEP164	VC2904	AC3	0.977406
2	Image 22_Airyscan Processing_Maximum intensity projection.czi:c:2/3 - Image 22_Airyscan Processing_Maximum intensity proje	0.768	10973.1	10352	12374	5.97	8422.75	4641636	2	2.556	shIFT88_CEP164	VC2904	AC3	1.2229
5	Image 23_Airyscan Processing_Maximum intensity projection.czi:c:2/3 - Image 23_Airyscan Processing_Maximum intensity proje	0.648	12131.8	10488	14424	4.958	7859.17	4331056	2	2.372	shIFT88_CEP164	VC2904	AC3	1.14107
1	Image 9_Airyscan Processing_Maximum intensity projection.czi:c:1/3 - Image 9_Airyscan Processing_Maximum intensity projec	0.339	11840.7	10261	14358	2.431	4017.93	2214213	1	1.13	shIFT88_CEP164	VC2905	IFT88	0.464979
4	Image 8_Airyscan Processing_Maximum intensity projection.czi:c:1/3 - Image 8_Airyscan Processing_Maximum intensity projec	1.072	10390.9	10086	11490	7.953	11143.6	6141027	1	3.83	shIFT88_CEP164	VC2905	IFT88	1.2896
7	Image 7_Airyscan Processing_Maximum intensity projection.czi:c:1/3 - Image 7_Airyscan Processing_Maximum intensity projec	0.757	10970.3	10116	14592	5.999	8301.17	4574634	1	2.862	shIFT88_CEP164	VC2905	IFT88	0.960662
11	Image 5_Airyscan Processing_Maximum intensity projection.czi:c:1/3 - Image 5_Airyscan Processing_Maximum intensity projec	0.958	10265.1	10070	10812	9.657	9835.11	5419963	1	4.716	shIFT88_CEP164	VC2905	IFT88	1.13818
2	Image 9_Airyscan Processing_Maximum intensity projection.czi:c:2/3 - Image 9_Airyscan Processing_Maximum intensity projec	0.339	14360.2	11419	17238	2.431	4872.87	2685356	2	1.13	shIFT88_CEP164	VC2905	AC3	0.563918
5	Image 8_Airyscan Processing_Maximum intensity projection.czi:c:2/3 - Image 8_Airyscan Processing_Maximum intensity projec	1.072	11909.6	10647	14143	7.953	12772.3	7038596	2	3.83	shIFT88_CEP164	VC2905	AC3	1.47809
8	Image 7_Airyscan Processing_Maximum intensity projection.czi:c:2/3 - Image 7_Airyscan Processing_Maximum intensity projec	0.757	11836.8	10670	15515	5.999	8956.78	4935934	2	2.862	shIFT88_CEP164	VC2905	AC3	1.03653
10	Image 5_Airyscan Processing_Maximum intensity projection.czi:c:2/3 - Image 5_Airyscan Processing_Maximum intensity projec	0.958	10893.7	10220	12146	9.657	10437.4	5751858	2	4.716	shIFT88_CEP164	VC2905	AC3	1.20788

## Sheet: SuppFig1_F_G_48h
Measurement	Image	Area	Mean	Min	Max	Perimeter	IntDen	RawIntDen	Channel	Length	Treatment	Dissociation	Marker	NormInt
1	Image 18_Airyscan Processing_Maximum intensity projection.czi:0002-0421-0570:c:2/3 - Image 18_Airyscan Processing_Maximum intensity proje	1.203	16381.3	11881	23488	10.109	19708.1	10860789	2	4.889	CTL	VC2860	AC3	1.00215
6	Image 17_Airyscan Processing_Maximum intensity projection.czi:0001-0240-0508:c:2/3 - Image 17_Airyscan Processing_Maximum intensity proje	1.334	15491.1	11219	20649	9.475	20661.1	11385975	2	4.402	CTL	VC2860	AC3	1.05061
9	Image 16_Airyscan Processing_Maximum intensity projection.czi:0001-0343-0591:c:2/3 - Image 16_Airyscan Processing_Maximum intensity proje	1.121	17178.4	11987	26509	7.517	19264.4	10616276	2	3.499	CTL	VC2860	AC3	0.979591
11	Image 15_Airyscan Processing_Maximum intensity projection.czi:15:c:2/3 - Image 15_Airyscan Processing_Maximum intensity proje	0.954	13091.4	11091	16574	9.513	12495.5	6886064	2	4.594	CTL	VC2860	AC3	0.635395
15	Image 14_Airyscan Processing_Maximum intensity projection.czi:0001-0819-0688:c:2/3 - Image 14_Airyscan Processing_Maximum intensity proje	0.806	21789.7	13676	34843	6.036	17555.6	9674619	2	2.955	CTL	VC2860	AC3	0.892702
18	Image 13_Airyscan Processing_Maximum intensity projection.czi:13:c:2/3 - Image 13_Airyscan Processing_Maximum intensity proje	2.003	16827.8	11990	25129	14.758	33711.5	18577855	2	7.211	CTL	VC2860	AC3	1.71423
20	Image 12_Airyscan Processing_Maximum intensity projection.czi:12:c:2/3 - Image 12_Airyscan Processing_Maximum intensity proje	1.042	13694.5	10609	19217	7.235	14264	7860640	2	3.594	CTL	VC2860	AC3	0.725321
16	Image 22_Airyscan Processing_Maximum intensity projection.czi:c:2/3 - Image 22_Airyscan Processing_Maximum intensity proje	0.744	10596.5	10244	11208	6.753	7883.69	4344569	2	3.356	CTL	VC2905	AC3	0.697602
19	Image 21_Airyscan Processing_Maximum intensity projection.czi:c:2/3 - Image 21_Airyscan Processing_Maximum intensity proje	0.599	11703.5	10550	13306	4.86	7008.27	3862140	2	2.384	CTL	VC2905	AC3	0.620139
22	Image 20_Airyscan Processing_Maximum intensity projection.czi:c:2/3 - Image 20_Airyscan Processing_Maximum intensity proje	0.688	12516.3	10603	14013	4.766	8607.95	4743696	2	2.256	CTL	VC2905	AC3	0.761689
28	Image 18_Airyscan Processing_Maximum intensity projection.czi:c:2/3 - Image 18_Airyscan Processing_Maximum intensity proje	2.234	11435.8	10315	13288	15.055	25545.1	14077496	2	7.375	CTL	VC2905	AC3	2.2604
31	Image 17_Airyscan Processing_Maximum intensity projection.czi:c:2/3 - Image 17_Airyscan Processing_Maximum intensity proje	0.336	12746.4	10510	14063	2.783	4279	2358085	2	1.41	CTL	VC2905	AC3	0.378635
34	Image 16_Airyscan Processing_Maximum intensity projection.czi:c:2/3 - Image 16_Airyscan Processing_Maximum intensity proje	0.639	11836.6	10448	13231	3.921	7560.56	4166495	2	2.07	CTL	VC2905	AC3	0.669009
2	Image 19_Airyscan Processing_Maximum intensity projection.czi:0001-0205-0263:c:2/3 - Image 19_Airyscan Processing_Maximum intensity proje	1.49	12232.1	10722	16006	11.242	18223.3	10042572	2	5.646	CTL	VC2905	AC3	1.61252
24	Image 22_Airyscan Processing_Maximum intensity projection.czi:22:c:2/3 - Image 22_Airyscan Processing_Maximum intensity proje	1.51	13489.2	10439	20893	14.969	20365.3	11223000	2	7.403	shCEP164	VC2860	AC3	1.03557
27	Image 21_Airyscan Processing_Maximum intensity projection.czi:0001-0470-0339:c:2/3 - Image 21_Airyscan Processing_Maximum intensity proje	1.571	14052.7	10333	25234	11.143	22083.1	12169601	2	5.162	shCEP164	VC2860	AC3	1.12292
30	Image 20_Airyscan Processing_Maximum intensity projection.czi:c:2/3 - Image 20_Airyscan Processing_Maximum intensity proje	0.728	17656.6	12085	24946	4.607	12848	7080308	2	2.151	shCEP164	VC2860	AC3	0.653318
33	Image 19_Airyscan Processing_Maximum intensity projection.czi:0001-0528-0654:c:2/3 - Image 19_Airyscan Processing_Maximum intensity proje	0.397	22897.3	12783	32886	2.439	9099.36	5014506	2	1.097	shCEP164	VC2860	AC3	0.462701
36	Image 10_Airyscan Processing_Maximum intensity projection.czi:0001-0624-0445:c:2/3 - Image 10_Airyscan Processing_Maximum intensity proje	0.347	26048.2	14365	48848	2.802	9028.06	4975210	2	1.369	shCEP164	VC2860	AC3	0.459075
39	Image 9_Airyscan Processing_Maximum intensity projection.czi:0001-0447-0559:c:2/3 - Image 9_Airyscan Processing_Maximum intensity projec	1.096	12420.1	10793	16982	9.009	13612.7	7501726	2	4.116	shCEP164	VC2860	AC3	0.692203
42	Image 8_Airyscan Processing_Maximum intensity projection.czi:0001-0489-0527:c:2/3 - Image 8_Airyscan Processing_Maximum intensity projec	0.67	15615.3	11934	22786	4.877	10455.9	5762046	2	2.327	shCEP164	VC2860	AC3	0.531679
45	Image 7_Airyscan Processing_Maximum intensity projection.czi:0001-0666-0579:c:2/3 - Image 7_Airyscan Processing_Maximum intensity projec	0.307	15639.2	11864	22751	2.315	4796.06	2643030	2	0.91	shCEP164	VC2860	AC3	0.243879
2	Image 38_Airyscan Processing_Maximum intensity projection.czi:c:2/3 - Image 38_Airyscan Processing_Maximum intensity proje	0.541	12365.9	10728	15054	4.21	6686.88	3685028	2	2.023	shCEP164	VC2905	AC3	0.5917
5	Image 36_Airyscan Processing_Maximum intensity projection.czi:c:2/3 - Image 36_Airyscan Processing_Maximum intensity proje	0.508	12036	10755	12809	3.183	6115.35	3370066	2	1.74	shCEP164	VC2905	AC3	0.541127
8	Image 29_Airyscan Processing_Maximum intensity projection.czi:c:2/3 - Image 29_Airyscan Processing_Maximum intensity proje	1.033	12743.1	10895	14852	6.73	13157.4	7250799	2	3.155	shCEP164	VC2905	AC3	1.16425
11	Image 28_Airyscan Processing_Maximum intensity projection.czi:c:2/3 - Image 28_Airyscan Processing_Maximum intensity proje	0.929	11806.5	10525	14375	6.543	10969.2	6044944	2	3.08	shCEP164	VC2905	AC3	0.970629
14	Image 27_Airyscan Processing_Maximum intensity projection.czi:c:2/3 - Image 27_Airyscan Processing_Maximum intensity proje	0.361	11008.4	10381	11871	2.883	3975.22	2190675	2	1.3	shCEP164	VC2905	AC3	0.351754
2	Image 35_Airyscan Processing_Maximum intensity projection.czi:c:2/3 - Image 35_Airyscan Processing_Maximum intensity proje	1.125	10736.5	10233	11864	7.883	12079.1	6656606	2	3.848	shIFT88	VC2905	AC3	1.06884
5	Image 33_Airyscan Processing_Maximum intensity projection.czi:c:2/3 - Image 33_Airyscan Processing_Maximum intensity proje	0.813	11381.8	10295	13360	6.297	9252.76	5099039	2	2.848	shIFT88	VC2905	AC3	0.818746
8	Image 32_Airyscan Processing_Maximum intensity projection.czi:c:2/3 - Image 32_Airyscan Processing_Maximum intensity proje	0.463	14134.7	11002	16977	2.757	6540.49	3604353	2	1.11	shIFT88	VC2905	AC3	0.578746
2	Image 23_Airyscan Processing_Maximum intensity projection.czi:0001-0517-0617:c:2/3 - Image 23_Airyscan Processing_Maximum intensity proje	0.413	35143	18494	55579	2.669	14513.2	7520612	2	0.856	CTL	VC2853	ARL13b	0.748729
5	Image 20_Airyscan Processing_Maximum intensity projection.czi:0001-0415-0445:c:2/3 - Image 20_Airyscan Processing_Maximum intensity proje	0.228	20290.9	13510	29072	2.014	4620.55	2394324	2	0.866	CTL	VC2853	ARL13b	0.238372
9	Image 19_Airyscan Processing_Maximum intensity projection.czi:0001-0484-0651:c:2/3 - Image 19_Airyscan Processing_Maximum intensity proje	0.376	35182.9	19510	49961	2.341	13239.7	6860665	2	0.858	CTL	VC2853	ARL13b	0.683027
12	Image 24_Airyscan Processing_Maximum intensity projection.czi:0001-0374-0684:c:2/3 - Image 24_Airyscan Processing_Maximum intensity proje	1.478	20090	11341	33938	11.916	29697.4	15388924	2	5.846	CTL	VC2853	ARL13b	1.53207
16	Image 22_Airyscan Processing_Maximum intensity projection.czi:0001-0340-0435:c:2/3 - Image 22_Airyscan Processing_Maximum intensity proje	1.519	29091.7	14739	50333	10.379	44183	22895192	2	5.009	CTL	VC2853	ARL13b	2.27938
19	Image 26_Airyscan Processing_Maximum intensity projection.czi:0002-0452-0534:c:2/3 - Image 26_Airyscan Processing_Maximum intensity proje	0.88	16056.9	10889	22698	6.403	14129.9	7321954	2	2.994	CTL	VC2853	ARL13b	0.728951
22	Image 25_Airyscan Processing_Maximum intensity projection.czi:0001-0169-0535:c:2/3 - Image 25_Airyscan Processing_Maximum intensity proje	0.482	29618.3	15815	43132	3.361	14289.3	7404567	2	1.559	CTL	VC2853	ARL13b	0.737176
25	Image 18_Airyscan Processing_Maximum intensity projection.czi:0001-0297-0434:c:2/3 - Image 18_Airyscan Processing_Maximum intensity proje	0.488	14029.2	11404	17510	3.747	6849.56	3549377	2	1.636	CTL	VC2853	ARL13b	0.353365
29	Image 17_Airyscan Processing_Maximum intensity projection.czi:0001-0591-0581:c:2/3 - Image 17_Airyscan Processing_Maximum intensity proje	0.347	39532.3	18160	56020	2.579	13732	7115806	2	1.152	CTL	VC2853	ARL13b	0.708428
33	Image 21_Airyscan Processing_Maximum intensity projection.czi:0001-0547-0714:c:2/3 - Image 21_Airyscan Processing_Maximum intensity proje	1.727	18322.9	12025	30002	12.585	31646.6	16398958	2	6.397	CTL	VC2853	ARL13b	1.63263
36	Image 16_Airyscan Processing_Maximum intensity projection.czi:0001-0547-0532:c:2/3 - Image 16_Airyscan Processing_Maximum intensity proje	1.268	20759.7	12859	36238	11.173	26320.7	13639139	2	5.272	CTL	VC2853	ARL13b	1.35787
6	Image 14_Airyscan Processing_Maximum intensity projection.czi:14:c:2/3 - Image 14_Airyscan Processing_Maximum intensity proje	0.921	16347.6	11716	27099	8.108	15048.1	7797789	2	3.827	CTL	VC2855	ARL13b	0.723299
8	Image 10_Airyscan Processing_Maximum intensity projection.czi:0001-0490-0424:c:2/3 - Image 10_Airyscan Processing_Maximum intensity proje	1.413	15783.1	11379	20752	9.307	22295.3	11553229	2	4.121	CTL	VC2855	ARL13b	1.07164
2	Image 13_Airyscan Processing_Maximum intensity projection.czi:0001-0437-0649:c:2/3 - Image 13_Airyscan Processing_Maximum intensity proje	1.787	14312.6	10864	23360	14.086	25576.5	13253486	2	6.604	CTL	VC2855	ARL13b	1.22935
5	Image 12_Airyscan Processing_Maximum intensity projection.czi:0001-0625-0631:c:2/3 - Image 12_Airyscan Processing_Maximum intensity proje	0.589	30376.1	12741	52398	3.542	17879	9264712	2	1.797	CTL	VC2855	ARL13b	0.859367
11	Image 9_Airyscan Processing_Maximum intensity projection.czi:0002-0633-0438:c:2/3 - Image 9_Airyscan Processing_Maximum intensity projec	1.772	19286.2	12069	28494	12.008	34166.5	17704761	2	5.969	CTL	VC2855	ARL13b	1.64224
14	Image 4_Airyscan Processing_Maximum intensity projection.czi:0001-0180-0575:c:2/3 - Image 4_Airyscan Processing_Maximum intensity projec	0.328	31725.4	18078	47912	2.146	10408	5393325	2	0.823	CTL	VC2855	ARL13b	0.500269
17	Image 3_Airyscan Processing_Maximum intensity projection.czi:0001-0447-0602:c:2/3 - Image 3_Airyscan Processing_Maximum intensity projec	1.333	15193.5	11567	20712	8.88	20260.3	10498715	2	4.156	CTL	VC2855	ARL13b	0.973829
1	Image 24_Airyscan Processing_Maximum intensity projection.czi:0002-0222-0190:c:2/3 - Image 24_Airyscan Processing_Maximum intensity proje	2.269	10771.9	10128	12570	16.7	24446.1	3166927	2	7.983	CTL	VC2857	ARL13b	1.54298
5	Image 26_Airyscan Processing_Maximum intensity projection.czi:0001-0185-0316:c:2/3 - Image 26_Airyscan Processing_Maximum intensity proje	0.54	12884.1	10562	15640	3.135	6961.8	901884	2	1.329	CTL	VC2857	ARL13b	0.439413
7	Image 27_Airyscan Processing_Maximum intensity projection.czi:c:2/3 - Image 27_Airyscan Processing_Maximum intensity proje	1.459	11245.5	10297	12563	8.934	16406.2	2125390	2	4.54	CTL	VC2857	ARL13b	1.03553
13	Image 28_Airyscan Processing_Maximum intensity projection.czi:0001-0175-0235:c:2/3 - Image 28_Airyscan Processing_Maximum intensity proje	2.208	11165.9	10080	13507	15.45	24650.7	3193437	2	8.315	CTL	VC2857	ARL13b	1.5559
16	Image 29_Airyscan Processing_Maximum intensity projection.czi:0001-0211-0353:c:2/3 - Image 29_Airyscan Processing_Maximum intensity proje	0.957	11751.7	10357	13641	6.533	11248.4	1457205	2	3.127	CTL	VC2857	ARL13b	0.709975
19	Image 30_Airyscan Processing_Maximum intensity projection.czi:0001-0285-0306:c:2/3 - Image 30_Airyscan Processing_Maximum intensity proje	0.934	12148.7	10444	15512	7.586	11347.2	1469997	2	3.463	CTL	VC2857	ARL13b	0.716208
1	Image 19_Airyscan Processing_Maximum intensity projection.czi:c:2/3 - Image 19_Airyscan Processing_Maximum intensity proje	1.636	11883.4	10550	15139	9.716	19446.8	2519280	2	4.196	CTL	VC2859	ARL13b	1.31811
4	Image 18_Airyscan Processing_Maximum intensity projection.czi:0002-0236-0198:c:2/3 - Image 18_Airyscan Processing_Maximum intensity proje	0.648	14305	11498	18736	4.368	9275.5	1201619	2	2.055	CTL	VC2859	ARL13b	0.628698
7	Image 12_Airyscan Processing_Maximum intensity projection.czi:0002-0303-0265:c:2/3 - Image 12_Airyscan Processing_Maximum intensity proje	1.258	11414.1	10365	13901	9.145	14361.5	1860503	2	4.399	CTL	VC2859	ARL13b	0.973432
11	Image 11_Airyscan Processing_Maximum intensity projection.czi:0001-0301-0356:c:2/3 - Image 11_Airyscan Processing_Maximum intensity proje	1.189	12077.6	10351	14857	6.935	14357.3	1859948	2	3.318	CTL	VC2859	ARL13b	0.973141
13	Image 7_Airyscan Processing_Maximum intensity projection.czi:0002-0335-0345:c:2/3 - Image 7_Airyscan Processing_Maximum intensity projec	1.474	11073.6	10383	12172	9.045	16326.5	2115064	2	4.415	CTL	VC2859	ARL13b	1.10662
17	Image 17_Airyscan Processing_Maximum intensity projection.czi:0001-0275-0374:c:2/3 - Image 17_Airyscan Processing_Maximum intensity proje	0.648	15839.8	10993	23847	4.057	10270.7	1330540	2	1.625	shCEP164	VC2859	ARL13b	0.69615
21	Image 15_Airyscan Processing_Maximum intensity projection.czi:0002-0208-0082:c:2/3 - Image 15_Airyscan Processing_Maximum intensity proje	1.397	11261.1	10144	13392	8.235	15733.7	2038260	2	3.978	shCEP164	VC2859	ARL13b	1.06644
25	Image 14_Airyscan Processing_Maximum intensity projection.czi:0002-0328-0216:c:2/3 - Image 14_Airyscan Processing_Maximum intensity proje	0.872	12101.4	10547	15317	6.937	10555.6	1367454	2	2.269	shCEP164	VC2859	ARL13b	0.715464
28	Image 13_Airyscan Processing_Maximum intensity projection.czi:0001-0186-0312:c:2/3 - Image 13_Airyscan Processing_Maximum intensity proje	0.594	15851.7	11312	24432	3.622	9421.9	1220584	2	1.713	shCEP164	VC2859	ARL13b	0.63862
17	Image 10_Airyscan Processing_Maximum intensity projection.czi:c:2/3 - Image 10_Airyscan Processing_Maximum intensity proje	0.88	12178.4	10699	15223	7.554	10716.8	1388338	2	3.702	shCEP164	VC2859	ARL13b	0.726391
35	Image 9_Airyscan Processing_Maximum intensity projection.czi:0001-0164-0267:c:2/3 - Image 9_Airyscan Processing_Maximum intensity projec	1.436	11353.7	10319	13427	8.914	16301.2	2111784	2	4.311	shCEP164	VC2859	ARL13b	1.1049
37	Image 8_Airyscan Processing_Maximum intensity projection.czi:0001-0206-0264:c:2/3 - Image 8_Airyscan Processing_Maximum intensity projec	2.516	11366.2	10246	13803	13.347	28602.4	3705373	2	6.267	shCEP164	VC2859	ARL13b	1.93868
67	Image 9_Airyscan Processing_Maximum intensity projection.czi:0002-0527-0350:c:2/3 - Image 9_Airyscan Processing_Maximum intensity projec	0.328	17456.1	12564	24585	2.297	5726.73	2967536	2	0.721	shIFT88_CEP164	VC2853	ARL13b	0.295439
71	Image 15_Airyscan Processing_Maximum intensity projection.czi:15:c:2/3 - Image 15_Airyscan Processing_Maximum intensity proje	0.376	13997	11412	17049	2.696	5267.21	2729416	2	1.071	shIFT88_CEP164	VC2853	ARL13b	0.271732
74	Image 40_Airyscan Processing_Maximum intensity projection.czi:0002-0613-0422:c:2/3 - Image 40_Airyscan Processing_Maximum intensity proje	0.38	48836.1	25433	62085	2.411	18566	9620710	2	1.006	shIFT88_CEP164	VC2853	ARL13b	0.957809
76	Image 14_Airyscan Processing_Maximum intensity projection.czi:0002-0337-0382:c:2/3 - Image 14_Airyscan Processing_Maximum intensity proje	0.261	51020.7	23149	65535	1.938	13292	6887799	2	0.747	shIFT88_CEP164	VC2853	ARL13b	0.685728
80	Image 8_Airyscan Processing_Maximum intensity projection.czi:0002-0526-0493:c:2/3 - Image 8_Airyscan Processing_Maximum intensity projec	0.297	25877.1	14541	38320	2.295	7690.37	3985077	2	0.922	shIFT88_CEP164	VC2853	ARL13b	0.396742
85	Image 33_Airyscan Processing_Maximum intensity projection.czi:0001-0584-0440:c:2/3 - Image 33_Airyscan Processing_Maximum intensity proje	0.367	30504.6	17923	45997	2.879	11184.8	5795873	2	1.4	shIFT88_CEP164	VC2853	ARL13b	0.577019
88	Image 10_Airyscan Processing_Maximum intensity projection.czi:0001-0446-0454:c:2/3 - Image 10_Airyscan Processing_Maximum intensity proje	0.558	23819	15725	36437	4.312	13284.1	6883704	2	1.972	shIFT88_CEP164	VC2853	ARL13b	0.685321
91	Image 35_Airyscan Processing_Maximum intensity projection.czi:0001-0438-0401:c:2/3 - Image 35_Airyscan Processing_Maximum intensity proje	0.648	19242.9	12360	33397	4.954	12477.3	6465608	2	2.481	shIFT88_CEP164	VC2853	ARL13b	0.643696
94	Image 34_Airyscan Processing_Maximum intensity projection.czi:0002-0469-0684:c:2/3 - Image 34_Airyscan Processing_Maximum intensity proje	0.185	30005.7	16052	48325	1.613	5558.86	2880547	2	0.674	shIFT88_CEP164	VC2853	ARL13b	0.286778
20	Image 23_Airyscan Processing_Maximum intensity projection.czi:0001-0484-0539:c:2/3 - Image 23_Airyscan Processing_Maximum intensity proje	0.336	21617	13107	40955	2.591	7258.64	3761355	2	1.017	shIFT88_CEP164	VC2855	ARL13b	0.348892
23	Image 21_Airyscan Processing_Maximum intensity projection.czi:0001-0632-0176:c:2/3 - Image 21_Airyscan Processing_Maximum intensity proje	0.232	49153.6	25108	65535	1.796	11382.8	5898435	2	0.734	shIFT88_CEP164	VC2855	ARL13b	0.547121
26	Image 20_Airyscan Processing_Maximum intensity projection.czi:0001-0715-0410:c:2/3 - Image 20_Airyscan Processing_Maximum intensity proje	0.303	37057	22368	46786	2.086	11227.4	5817952	2	0.97	shIFT88_CEP164	VC2855	ARL13b	0.539656
29	Image 19_Airyscan Processing_Maximum intensity projection.czi:0001-0575-0691:c:2/3 - Image 19_Airyscan Processing_Maximum intensity proje	0.158	40831.4	20616	65535	1.465	6461.28	3348171	2	0.586	shIFT88_CEP164	VC2855	ARL13b	0.310566
32	Image 18_Airyscan Processing_Maximum intensity projection.czi:0001-0436-0715:c:2/3 - Image 18_Airyscan Processing_Maximum intensity proje	0.438	27330.4	13613	44387	3.409	11972.4	6204004	2	1.394	shIFT88_CEP164	VC2855	ARL13b	0.575465
35	Image 17_Airyscan Processing_Maximum intensity projection.czi:0001-0483-0441:c:2/3 - Image 17_Airyscan Processing_Maximum intensity proje	0.407	15530.1	11450	21499	3.275	6323.65	3276857	2	1.523	shIFT88_CEP164	VC2855	ARL13b	0.303951
39	Image 16_Airyscan Processing_Maximum intensity projection.czi:0001-0473-0513:c:2/3 - Image 16_Airyscan Processing_Maximum intensity proje	0.471	31493	14576	49720	3.036	14829.1	7684297	2	1.154	shIFT88_CEP164	VC2855	ARL13b	0.712772
42	Image 15_Airyscan Processing_Maximum intensity projection.czi:0001-0632-0465:c:2/3 - Image 15_Airyscan Processing_Maximum intensity proje	0.272	41605.2	22302	64090	2.112	11320.8	5866340	2	0.843	shIFT88_CEP164	VC2855	ARL13b	0.544144
31	Image 38_Airyscan Processing_Maximum intensity projection.czi:0001-0363-0145:c:2/3 - Image 38_Airyscan Processing_Maximum intensity proje	0.185	15488.6	11629	20018	1.707	2869.43	371727	2	0.69	shIFT88_CEP164	VC2857	ARL13b	0.181112
34	Image 40_Airyscan Processing_Maximum intensity projection.czi:0001-0156-0309:c:2/3 - Image 40_Airyscan Processing_Maximum intensity proje	0.548	11484.8	10465	13383	4.152	6294.39	815423	2	1.907	shIFT88_CEP164	VC2857	ARL13b	0.397288
37	Image 41_Airyscan Processing_Maximum intensity projection.czi:0001-0209-0310:c:2/3 - Image 41_Airyscan Processing_Maximum intensity proje	0.286	13405.6	10876	16471	2.094	3828.76	496007	2	0.77	shIFT88_CEP164	VC2857	ARL13b	0.241663
40	Image 43_Airyscan Processing_Maximum intensity projection.czi:0001-0250-0196:c:2/3 - Image 43_Airyscan Processing_Maximum intensity proje	0.409	15455.8	11751	22018	2.82	6323.2	819155	2	1.243	shIFT88_CEP164	VC2857	ARL13b	0.399106
43	Image 44_Airyscan Processing_Maximum intensity projection.czi:0001-0260-0320:c:2/3 - Image 44_Airyscan Processing_Maximum intensity proje	0.208	12247.2	10679	14940	1.66	2552.54	330675	2	0.615	shIFT88_CEP164	VC2857	ARL13b	0.16111
46	Image 45_Airyscan Processing_Maximum intensity projection.czi:0001-0228-0261:c:2/3 - Image 45_Airyscan Processing_Maximum intensity proje	0.316	11243.8	10452	12565	2.297	3558.51	460996	2	0.942	shIFT88_CEP164	VC2857	ARL13b	0.224605
39	Image 27_Airyscan Processing_Maximum intensity projection.czi:0001-0377-0622:c:2/3 - Image 27_Airyscan Processing_Maximum intensity proje	0.336	38550.3	18192	57795	2.265	12944.6	6707754	2	0.882	shIFT88	VC2853	ARL13b	0.667804
44	Image 41_Airyscan Processing_Maximum intensity projection.czi:0001-0524-0490:c:2/3 - Image 41_Airyscan Processing_Maximum intensity proje	0.413	20189.8	13841	27053	2.701	8337.89	4320615	2	1.174	shIFT88	VC2853	ARL13b	0.430147
48	Image 30_Airyscan Processing_Maximum intensity projection.czi:0001-0400-0401:c:2/3 - Image 30_Airyscan Processing_Maximum intensity proje	0.774	24074.3	12141	49003	7.228	18629.8	9653781	2	3.59	shIFT88	VC2853	ARL13b	0.961101
51	Image 32_Airyscan Processing_Maximum intensity projection.czi:0001-0574-0469:c:2/3 - Image 32_Airyscan Processing_Maximum intensity proje	0.357	33339.7	16240	54330	2.711	11902.7	6167847	2	1.193	shIFT88	VC2853	ARL13b	0.614052
55	Image 28_Airyscan Processing_Maximum intensity projection.czi:0001-0637-0570:c:2/3 - Image 28_Airyscan Processing_Maximum intensity proje	1.179	25188.6	14605	39020	9.488	29699.9	15390216	2	4.612	shIFT88	VC2853	ARL13b	1.5322
58	Image 31_Airyscan Processing_Maximum intensity projection.czi:0002-0824-0396:c:2/3 - Image 31_Airyscan Processing_Maximum intensity proje	1.743	20895.2	10256	45485	15.6	36412.1	18868389	2	7.42	shIFT88	VC2853	ARL13b	1.87848
61	Image 43_Airyscan Processing_Maximum intensity projection.czi:0001-0495-0471:c:2/3 - Image 43_Airyscan Processing_Maximum intensity proje	0.378	36918.7	18992	62355	2.959	13964.1	7236063	2	1.483	shIFT88	VC2853	ARL13b	0.7204
64	Image 42_Airyscan Processing_Maximum intensity projection.czi:0001-0253-0702:c:2/3 - Image 42_Airyscan Processing_Maximum intensity proje	0.454	24465.1	13894	40967	3.522	11094.9	5749293	2	1.486	shIFT88	VC2853	ARL13b	0.572382
45	Image 8_Airyscan Processing_Maximum intensity projection.czi:0001-0548-0710:c:2/3 - Image 8_Airyscan Processing_Maximum intensity projec	0.332	48618.6	23175	63327	2.21	16137.7	8362394	2	1.696	shIFT88	VC2855	ARL13b	0.77567
49	Image 7_Airyscan Processing_Maximum intensity projection.czi:c:2/3 - Image 7_Airyscan Processing_Maximum intensity projec	0.255	40603	16467	65535	1.972	10342.9	5359602	2	0.731	shIFT88	VC2855	ARL13b	0.497141
52	Image 6_Airyscan Processing_Maximum intensity projection.czi:0001-0666-0497:c:2/3 - Image 6_Airyscan Processing_Maximum intensity projec	0.22	42101.1	21110	64975	1.735	9262.09	4799527	2	0.467	shIFT88	VC2855	ARL13b	0.44519
22	Image 33_Airyscan Processing_Maximum intensity projection.czi:c:2/3 - Image 33_Airyscan Processing_Maximum intensity proje	0.563	12517.8	10713	15344	4.237	7053.75	913796	2	2.084	shIFT88	VC2857	ARL13b	0.445217
25	Image 35_Airyscan Processing_Maximum intensity projection.czi:0001-0199-0270:c:2/3 - Image 35_Airyscan Processing_Maximum intensity proje	0.78	11369.9	10309	14439	5.735	8864.38	1148359	2	2.691	shIFT88	VC2857	ARL13b	0.5595
28	Image 37_Airyscan Processing_Maximum intensity projection.czi:0001-0285-0238:c:2/3 - Image 37_Airyscan Processing_Maximum intensity proje	0.401	12380.6	10673	14425	2.885	4969.53	643791	2	1.279	shIFT88	VC2857	ARL13b	0.313666
1	Image 23_Airyscan Processing_Maximum intensity projection.czi:0001-0517-0617:c:1/3 - Image 23_Airyscan Processing_Maximum intensity proje	0.413	16074.1	10768	21827	2.669	6638.21	3439854	1	0.856	CTL	VC2853	IFT88	0.529054
4	Image 20_Airyscan Processing_Maximum intensity projection.czi:0001-0415-0445:c:1/3 - Image 20_Airyscan Processing_Maximum intensity proje	0.228	14755.2	10346	23823	2.014	3359.98	1741108	1	0.866	CTL	VC2853	IFT88	0.267785
8	Image 19_Airyscan Processing_Maximum intensity projection.czi:0001-0484-0651:c:1/3 - Image 19_Airyscan Processing_Maximum intensity proje	0.376	30477.2	11228	47498	2.341	11468.9	5943061	1	0.858	CTL	VC2853	IFT88	0.91405
11	Image 24_Airyscan Processing_Maximum intensity projection.czi:0001-0374-0684:c:1/3 - Image 24_Airyscan Processing_Maximum intensity proje	1.478	14144.3	10097	36129	11.916	20908.4	10834526	1	5.846	CTL	VC2853	IFT88	1.66636
15	Image 22_Airyscan Processing_Maximum intensity projection.czi:0001-0340-0435:c:1/3 - Image 22_Airyscan Processing_Maximum intensity proje	1.519	13845.6	10204	28753	10.379	21028	10896525	1	5.009	CTL	VC2853	IFT88	1.6759
18	Image 26_Airyscan Processing_Maximum intensity projection.czi:0002-0452-0534:c:1/3 - Image 26_Airyscan Processing_Maximum intensity proje	0.88	13927.4	10123	22059	6.403	12255.9	6350885	1	2.994	CTL	VC2853	IFT88	0.976774
21	Image 25_Airyscan Processing_Maximum intensity projection.czi:0001-0169-0535:c:1/3 - Image 25_Airyscan Processing_Maximum intensity proje	0.482	15727.7	10250	22007	3.361	7587.81	3931929	1	1.559	CTL	VC2853	IFT88	0.604736
24	Image 18_Airyscan Processing_Maximum intensity projection.czi:0001-0297-0434:c:1/3 - Image 18_Airyscan Processing_Maximum intensity proje	0.488	12899.1	10462	18045	3.747	6297.81	3263466	1	1.636	CTL	VC2853	IFT88	0.501925
28	Image 17_Airyscan Processing_Maximum intensity projection.czi:0001-0591-0581:c:1/3 - Image 17_Airyscan Processing_Maximum intensity proje	0.347	23312.8	11678	42590	2.579	8098	4196307	1	1.152	CTL	VC2853	IFT88	0.645397
32	Image 21_Airyscan Processing_Maximum intensity projection.czi:0001-0547-0714:c:1/3 - Image 21_Airyscan Processing_Maximum intensity proje	1.727	13729.2	10212	19881	12.585	23712.6	12287658	1	6.397	CTL	VC2853	IFT88	1.88986
35	Image 16_Airyscan Processing_Maximum intensity projection.czi:0001-0547-0532:c:1/3 - Image 16_Airyscan Processing_Maximum intensity proje	1.268	13143.9	10282	21525	11.173	16664.8	8635555	1	5.272	CTL	VC2853	IFT88	1.32816
5	Image 14_Airyscan Processing_Maximum intensity projection.czi:14:c:1/3 - Image 14_Airyscan Processing_Maximum intensity proje	0.921	10891	10092	14356	8.108	10025.3	5195006	1	3.827	CTL	VC2855	IFT88	0.699359
7	Image 10_Airyscan Processing_Maximum intensity projection.czi:0001-0490-0424:c:1/3 - Image 10_Airyscan Processing_Maximum intensity proje	1.413	13058.6	10043	22883	9.307	18446.7	9558909	1	4.121	CTL	VC2855	IFT88	1.28683
1	Image 13_Airyscan Processing_Maximum intensity projection.czi:0001-0437-0649:c:1/3 - Image 13_Airyscan Processing_Maximum intensity proje	1.787	11311.8	9918	17256	14.086	20214.1	10474732	1	6.604	CTL	VC2855	IFT88	1.41012
4	Image 12_Airyscan Processing_Maximum intensity projection.czi:0001-0625-0631:c:1/3 - Image 12_Airyscan Processing_Maximum intensity proje	0.589	14609.7	10499	24624	3.542	8599.1	4455970	1	1.797	CTL	VC2855	IFT88	0.599869
10	Image 9_Airyscan Processing_Maximum intensity projection.czi:0002-0633-0438:c:1/3 - Image 9_Airyscan Processing_Maximum intensity projec	1.772	12520.1	10076	18825	12.008	22180	11493436	1	5.969	CTL	VC2855	IFT88	1.54726
13	Image 4_Airyscan Processing_Maximum intensity projection.czi:0001-0180-0575:c:1/3 - Image 4_Airyscan Processing_Maximum intensity projec	0.328	15405.9	10255	20449	2.146	5054.14	2619007	1	0.823	CTL	VC2855	IFT88	0.352575
16	Image 3_Airyscan Processing_Maximum intensity projection.czi:0001-0447-0602:c:1/3 - Image 3_Airyscan Processing_Maximum intensity projec	1.333	11867.7	10076	16705	8.88	15825.4	8200590	1	4.156	CTL	VC2855	IFT88	1.10398
2	Image 24_Airyscan Processing_Maximum intensity projection.czi:0002-0222-0190:c:1/3 - Image 24_Airyscan Processing_Maximum intensity proje	2.269	10131.1	10068	10414	16.7	22991.9	2978542	1	7.983	CTL	VC2857	IFT88	1.60821
4	Image 26_Airyscan Processing_Maximum intensity projection.czi:0001-0185-0316:c:1/3 - Image 26_Airyscan Processing_Maximum intensity proje	0.54	11113.5	10144	12209	3.135	6005.08	777944	1	1.329	CTL	VC2857	IFT88	0.420038
8	Image 27_Airyscan Processing_Maximum intensity projection.czi:0002-0203-0202:c:1/3 - Image 27_Airyscan Processing_Maximum intensity proje	1.459	10331.6	10077	10792	8.934	15073.1	1952679	1	4.54	CTL	VC2857	IFT88	1.05432
12	Image 28_Airyscan Processing_Maximum intensity projection.czi:0001-0175-0235:c:1/3 - Image 28_Airyscan Processing_Maximum intensity proje	2.208	10137.4	10062	10530	15.45	22380.3	2899310	1	8.315	CTL	VC2857	IFT88	1.56543
15	Image 29_Airyscan Processing_Maximum intensity projection.czi:0001-0211-0353:c:1/3 - Image 29_Airyscan Processing_Maximum intensity proje	0.957	10216.9	10070	10788	6.533	9779.37	1266894	1	3.127	CTL	VC2857	IFT88	0.684038
18	Image 30_Airyscan Processing_Maximum intensity projection.czi:0001-0285-0306:c:1/3 - Image 30_Airyscan Processing_Maximum intensity proje	0.934	10224.1	10071	10683	7.586	9549.47	1237111	1	3.463	CTL	VC2857	IFT88	0.667958
2	Image 18_Airyscan Processing_Maximum intensity projection.czi:0002-0421-0570:c:1/3 - Image 18_Airyscan Processing_Maximum intensity proje	1.203	11219.9	10049	19336	10.109	13498.4	7438764	1	4.889	CTL	VC2860	IFT88	0.994735
5	Image 17_Airyscan Processing_Maximum intensity projection.czi:0001-0240-0508:c:1/3 - Image 17_Airyscan Processing_Maximum intensity proje	1.334	11836.1	10055	20711	9.475	15786.2	8699519	1	4.402	CTL	VC2860	IFT88	1.16333
8	Image 16_Airyscan Processing_Maximum intensity projection.czi:0001-0343-0591:c:1/3 - Image 16_Airyscan Processing_Maximum intensity proje	1.121	12140.8	10001	18097	7.517	13615.1	7503036	1	3.499	CTL	VC2860	IFT88	1.00333
12	Image 15_Airyscan Processing_Maximum intensity projection.czi:15:c:1/3 - Image 15_Airyscan Processing_Maximum intensity proje	0.954	10917.3	10016	15344	9.513	10420.4	5742481	1	4.594	CTL	VC2860	IFT88	0.767903
14	Image 14_Airyscan Processing_Maximum intensity projection.czi:0001-0819-0688:c:1/3 - Image 14_Airyscan Processing_Maximum intensity proje	0.806	10567.9	10005	12875	6.036	8514.39	4692136	1	2.955	CTL	VC2860	IFT88	0.627447
17	Image 13_Airyscan Processing_Maximum intensity projection.czi:13:c:1/3 - Image 13_Airyscan Processing_Maximum intensity proje	2.003	10963.1	10027	17476	14.758	21962.6	12103238	1	7.211	CTL	VC2860	IFT88	1.61848
21	Image 12_Airyscan Processing_Maximum intensity projection.czi:12:c:1/3 - Image 12_Airyscan Processing_Maximum intensity proje	1.042	10745.2	10038	14539	7.235	11192.1	6167769	1	3.594	CTL	VC2860	IFT88	0.824774
2	Image 19_Airyscan Processing_Maximum intensity projection.czi:0002-0287-0262:c:1/3 - Image 19_Airyscan Processing_Maximum intensity proje	1.636	10488.6	10139	11475	9.716	17164.2	2223583	1	4.196	CTL	VC2859	IFT88	1.30036
5	Image 18_Airyscan Processing_Maximum intensity projection.czi:0002-0236-0198:c:1/3 - Image 18_Airyscan Processing_Maximum intensity proje	0.648	10865.9	10177	12559	4.368	7045.55	912734	1	2.055	CTL	VC2859	IFT88	0.533771
8	Image 12_Airyscan Processing_Maximum intensity projection.czi:0002-0303-0265:c:1/3 - Image 12_Airyscan Processing_Maximum intensity proje	1.258	10599.1	10072	12331	9.145	13336	1727653	1	4.399	CTL	VC2859	IFT88	1.01034
10	Image 11_Airyscan Processing_Maximum intensity projection.czi:0001-0301-0356:c:1/3 - Image 11_Airyscan Processing_Maximum intensity proje	1.189	10898.7	10119	13766	6.935	12955.9	1678402	1	3.318	CTL	VC2859	IFT88	0.981537
14	Image 7_Airyscan Processing_Maximum intensity projection.czi:0002-0335-0345:c:1/3 - Image 7_Airyscan Processing_Maximum intensity projec	1.474	10510.5	10072	11501	9.045	15496.2	2007496	1	4.415	CTL	VC2859	IFT88	1.17399
15	Image 22_Airyscan Processing_Maximum intensity projection.czi:c:1/3 - Image 22_Airyscan Processing_Maximum intensity proje	0.744	10317.8	10106	10967	6.753	7676.3	4230279	1	3.356	CTL	VC2905	IFT88	0.768499
18	Image 21_Airyscan Processing_Maximum intensity projection.czi:c:1/3 - Image 21_Airyscan Processing_Maximum intensity proje	0.599	10546.9	10063	11345	4.86	6315.72	3480488	1	2.384	CTL	VC2905	IFT88	0.632287
21	Image 20_Airyscan Processing_Maximum intensity projection.czi:c:1/3 - Image 20_Airyscan Processing_Maximum intensity proje	0.688	10999.4	10219	11829	4.766	7564.71	4168783	1	2.256	CTL	VC2905	IFT88	0.757327
27	Image 18_Airyscan Processing_Maximum intensity projection.czi:c:1/3 - Image 18_Airyscan Processing_Maximum intensity proje	2.234	10225.7	10059	11195	15.055	22841.9	12587776	1	7.375	CTL	VC2905	IFT88	2.28677
30	Image 17_Airyscan Processing_Maximum intensity projection.czi:c:1/3 - Image 17_Airyscan Processing_Maximum intensity proje	0.336	10720.5	10286	11308	2.783	3598.91	1983297	1	1.41	CTL	VC2905	IFT88	0.360298
33	Image 16_Airyscan Processing_Maximum intensity projection.czi:c:1/3 - Image 16_Airyscan Processing_Maximum intensity proje	0.639	10293.9	10070	10556	3.921	6575.16	3623462	1	2.07	CTL	VC2905	IFT88	0.658261
1	Image 19_Airyscan Processing_Maximum intensity projection.czi:0001-0205-0263:c:1/3 - Image 19_Airyscan Processing_Maximum intensity proje	1.49	10302.2	10066	10813	11.242	15348.2	8458123	1	5.646	CTL	VC2905	IFT88	1.53656
23	Image 22_Airyscan Processing_Maximum intensity projection.czi:22:c:1/3 - Image 22_Airyscan Processing_Maximum intensity proje	1.51	12251.3	10045	24239	14.969	18496.5	10193107	1	7.403	shCEP164	VC2860	IFT88	1.36305
26	Image 21_Airyscan Processing_Maximum intensity projection.czi:0001-0470-0339:c:1/3 - Image 21_Airyscan Processing_Maximum intensity proje	1.571	10853.6	10047	15903	11.143	17056	9399250	1	5.162	shCEP164	VC2860	IFT88	1.2569
29	Image 20_Airyscan Processing_Maximum intensity projection.czi:c:1/3 - Image 20_Airyscan Processing_Maximum intensity proje	0.728	11204.4	10137	14133	4.607	8152.95	4492953	1	2.151	shCEP164	VC2860	IFT88	0.600812
32	Image 19_Airyscan Processing_Maximum intensity projection.czi:0001-0528-0654:c:1/3 - Image 19_Airyscan Processing_Maximum intensity proje	0.397	11599.4	10060	15538	2.439	4609.59	2540268	1	1.097	shCEP164	VC2860	IFT88	0.339693
35	Image 10_Airyscan Processing_Maximum intensity projection.czi:0001-0624-0445:c:1/3 - Image 10_Airyscan Processing_Maximum intensity proje	0.347	12987.4	10092	16068	2.802	4501.31	2480598	1	1.369	shCEP164	VC2860	IFT88	0.331713
38	Image 9_Airyscan Processing_Maximum intensity projection.czi:0001-0447-0559:c:1/3 - Image 9_Airyscan Processing_Maximum intensity projec	1.096	10760.2	10027	14436	9.009	11793.4	6499172	1	4.116	shCEP164	VC2860	IFT88	0.86909
41	Image 8_Airyscan Processing_Maximum intensity projection.czi:0001-0489-0527:c:1/3 - Image 8_Airyscan Processing_Maximum intensity projec	0.67	11403.6	10060	15873	4.877	7635.73	4207923	1	2.327	shCEP164	VC2860	IFT88	0.562697
44	Image 7_Airyscan Processing_Maximum intensity projection.czi:0001-0666-0579:c:1/3 - Image 7_Airyscan Processing_Maximum intensity projec	0.307	13698.1	10104	21086	2.315	4200.78	2314980	1	0.91	shCEP164	VC2860	IFT88	0.309567
16	Image 17_Airyscan Processing_Maximum intensity projection.czi:0001-0275-0374:c:1/3 - Image 17_Airyscan Processing_Maximum intensity proje	0.648	11881.4	9991	15092	4.057	7704.01	998036	1	1.625	shCEP164	VC2859	IFT88	0.583656
22	Image 15_Airyscan Processing_Maximum intensity projection.czi:0002-0208-0082:c:1/3 - Image 15_Airyscan Processing_Maximum intensity proje	1.397	10431.6	10107	11347	8.235	14574.7	1888114	1	3.978	shCEP164	VC2859	IFT88	1.10418
24	Image 14_Airyscan Processing_Maximum intensity projection.czi:0002-0328-0216:c:1/3 - Image 14_Airyscan Processing_Maximum intensity proje	0.872	10420.3	10082	11552	6.937	9089.29	1177495	1	2.269	shCEP164	VC2859	IFT88	0.688604
27	Image 13_Airyscan Processing_Maximum intensity projection.czi:0001-0186-0312:c:1/3 - Image 13_Airyscan Processing_Maximum intensity proje	0.594	11738.9	10316	15104	3.622	6977.34	903898	1	1.713	shCEP164	VC2859	IFT88	0.528603
16	Image 10_Airyscan Processing_Maximum intensity projection.czi:c:1/3 - Image 10_Airyscan Processing_Maximum intensity proje	0.88	10445.3	10077	12371	7.554	9191.7	1190762	1	3.702	shCEP164	VC2859	IFT88	0.696363
34	Image 9_Airyscan Processing_Maximum intensity projection.czi:0001-0164-0267:c:1/3 - Image 9_Airyscan Processing_Maximum intensity projec	1.436	10370.5	10045	11700	8.914	14889.6	1928916	1	4.311	shCEP164	VC2859	IFT88	1.12804
38	Image 8_Airyscan Processing_Maximum intensity projection.czi:0001-0206-0264:c:1/3 - Image 8_Airyscan Processing_Maximum intensity projec	2.516	10256.3	10081	11172	13.347	25809.4	3343548	1	6.267	shCEP164	VC2859	IFT88	1.95532
1	Image 38_Airyscan Processing_Maximum intensity projection.czi:c:1/3 - Image 38_Airyscan Processing_Maximum intensity proje	0.541	10958.5	10140	12528	4.21	5925.83	3265625	1	2.023	shCEP164	VC2905	IFT88	0.593254
4	Image 36_Airyscan Processing_Maximum intensity projection.czi:c:1/3 - Image 36_Airyscan Processing_Maximum intensity proje	0.508	10519.5	10073	11164	3.183	5344.85	2945460	1	1.74	shCEP164	VC2905	IFT88	0.535091
7	Image 29_Airyscan Processing_Maximum intensity projection.czi:c:1/3 - Image 29_Airyscan Processing_Maximum intensity proje	1.033	10480.7	10090	11193	6.73	10821.5	5963529	1	3.155	shCEP164	VC2905	IFT88	1.08337
10	Image 28_Airyscan Processing_Maximum intensity projection.czi:c:1/3 - Image 28_Airyscan Processing_Maximum intensity proje	0.929	10224.3	10068	10673	6.543	9499.14	5234817	1	3.08	shCEP164	VC2905	IFT88	0.950989
13	Image 27_Airyscan Processing_Maximum intensity projection.czi:c:1/3 - Image 27_Airyscan Processing_Maximum intensity proje	0.361	10299.8	10067	10803	2.883	3719.33	2049659	1	1.3	shCEP164	VC2905	IFT88	0.372354
66	Image 9_Airyscan Processing_Maximum intensity projection.czi:0002-0527-0350:c:1/3 - Image 9_Airyscan Processing_Maximum intensity projec	0.328	15054.7	10414	25041	2.297	4938.93	2559303	1	0.721	shIFT88_CEP164	VC2853	IFT88	0.393624
70	Image 15_Airyscan Processing_Maximum intensity projection.czi:15:c:1/3 - Image 15_Airyscan Processing_Maximum intensity proje	0.376	11747.7	10137	17702	2.696	4420.78	2290805	1	1.071	shIFT88_CEP164	VC2853	IFT88	0.352329
73	Image 40_Airyscan Processing_Maximum intensity projection.czi:0002-0613-0422:c:1/3 - Image 40_Airyscan Processing_Maximum intensity proje	0.38	14235.9	10897	19365	2.411	5412.06	2804476	1	1.006	shIFT88_CEP164	VC2853	IFT88	0.431332
77	Image 14_Airyscan Processing_Maximum intensity projection.czi:0002-0337-0382:c:1/3 - Image 14_Airyscan Processing_Maximum intensity proje	0.261	16174.3	10448	25102	1.938	4213.76	2183529	1	0.747	shIFT88_CEP164	VC2853	IFT88	0.335829
79	Image 8_Airyscan Processing_Maximum intensity projection.czi:0002-0526-0493:c:1/3 - Image 8_Airyscan Processing_Maximum intensity projec	0.297	15749.4	10639	26047	2.295	4680.54	2425411	1	0.922	shIFT88_CEP164	VC2853	IFT88	0.373031
84	Image 33_Airyscan Processing_Maximum intensity projection.czi:0001-0584-0440:c:1/3 - Image 33_Airyscan Processing_Maximum intensity proje	0.367	20792.5	12368	34190	2.879	7623.78	3950568	1	1.4	shIFT88_CEP164	VC2853	IFT88	0.607602
87	Image 10_Airyscan Processing_Maximum intensity projection.czi:0001-0446-0454:c:1/3 - Image 10_Airyscan Processing_Maximum intensity proje	0.558	12496.4	10303	16923	4.312	6969.37	3611459	1	1.972	shIFT88_CEP164	VC2853	IFT88	0.555447
90	Image 35_Airyscan Processing_Maximum intensity projection.czi:0001-0438-0401:c:1/3 - Image 35_Airyscan Processing_Maximum intensity proje	0.648	12549.2	10130	19005	4.954	8137.06	4216544	1	2.481	shIFT88_CEP164	VC2853	IFT88	0.64851
93	Image 34_Airyscan Processing_Maximum intensity projection.czi:0002-0469-0684:c:1/3 - Image 34_Airyscan Processing_Maximum intensity proje	0.185	11822.4	10132	14798	1.613	2190.22	1134950	1	0.674	shIFT88_CEP164	VC2853	IFT88	0.174557
19	Image 23_Airyscan Processing_Maximum intensity projection.czi:0001-0484-0539:c:1/3 - Image 23_Airyscan Processing_Maximum intensity proje	0.336	12939.4	10168	19061	2.591	4344.83	2251450	1	1.017	shIFT88_CEP164	VC2855	IFT88	0.303094
22	Image 21_Airyscan Processing_Maximum intensity projection.czi:0001-0632-0176:c:1/3 - Image 21_Airyscan Processing_Maximum intensity proje	0.232	15201.1	10296	20253	1.796	3520.2	1824135	1	0.734	shIFT88_CEP164	VC2855	IFT88	0.245568
25	Image 20_Airyscan Processing_Maximum intensity projection.czi:0001-0715-0410:c:1/3 - Image 20_Airyscan Processing_Maximum intensity proje	0.303	13373.9	10719	16223	2.086	4051.98	2099697	1	0.97	shIFT88_CEP164	VC2855	IFT88	0.282664
28	Image 19_Airyscan Processing_Maximum intensity projection.czi:0001-0575-0691:c:1/3 - Image 19_Airyscan Processing_Maximum intensity proje	0.158	17173	11775	23063	1.465	2717.51	1408186	1	0.586	shIFT88_CEP164	VC2855	IFT88	0.189572
31	Image 18_Airyscan Processing_Maximum intensity projection.czi:0001-0436-0715:c:1/3 - Image 18_Airyscan Processing_Maximum intensity proje	0.438	13025.7	10033	22042	3.409	5706.07	2956830	1	1.394	shIFT88_CEP164	VC2855	IFT88	0.398053
34	Image 17_Airyscan Processing_Maximum intensity projection.czi:0001-0483-0441:c:1/3 - Image 17_Airyscan Processing_Maximum intensity proje	0.407	11534.9	10109	13648	3.275	4696.87	2433873	1	1.523	shIFT88_CEP164	VC2855	IFT88	0.327652
38	Image 16_Airyscan Processing_Maximum intensity projection.czi:0001-0473-0513:c:1/3 - Image 16_Airyscan Processing_Maximum intensity proje	0.471	12107.3	10111	16547	3.036	5700.95	2954179	1	1.154	shIFT88_CEP164	VC2855	IFT88	0.397696
41	Image 15_Airyscan Processing_Maximum intensity projection.czi:0001-0632-0465:c:1/3 - Image 15_Airyscan Processing_Maximum intensity proje	0.272	13168.8	10509	18589	2.112	3583.25	1856805	1	0.843	shIFT88_CEP164	VC2855	IFT88	0.249966
30	Image 38_Airyscan Processing_Maximum intensity projection.czi:0001-0363-0145:c:1/3 - Image 38_Airyscan Processing_Maximum intensity proje	0.185	10286.1	10084	10561	1.707	1905.61	246867	1	0.69	shIFT88_CEP164	VC2857	IFT88	0.133292
33	Image 40_Airyscan Processing_Maximum intensity projection.czi:0001-0156-0309:c:1/3 - Image 40_Airyscan Processing_Maximum intensity proje	0.548	10222.6	10086	10825	4.152	5602.61	725805	1	1.907	shIFT88_CEP164	VC2857	IFT88	0.391886
36	Image 41_Airyscan Processing_Maximum intensity projection.czi:0001-0209-0310:c:1/3 - Image 41_Airyscan Processing_Maximum intensity proje	0.286	10212.1	10098	10446	2.094	2916.68	377849	1	0.77	shIFT88_CEP164	VC2857	IFT88	0.204013
39	Image 43_Airyscan Processing_Maximum intensity projection.czi:0001-0250-0196:c:1/3 - Image 43_Airyscan Processing_Maximum intensity proje	0.409	10234.9	10085	10542	2.82	4187.25	542448	1	1.243	shIFT88_CEP164	VC2857	IFT88	0.292886
42	Image 44_Airyscan Processing_Maximum intensity projection.czi:0001-0260-0320:c:1/3 - Image 44_Airyscan Processing_Maximum intensity proje	0.208	10204.5	10064	10330	1.66	2126.8	275522	1	0.615	shIFT88_CEP164	VC2857	IFT88	0.148764
45	Image 45_Airyscan Processing_Maximum intensity projection.czi:0001-0228-0261:c:1/3 - Image 45_Airyscan Processing_Maximum intensity proje	0.316	10175.6	10077	10364	2.297	3220.42	417198	1	0.942	shIFT88_CEP164	VC2857	IFT88	0.225259
38	Image 27_Airyscan Processing_Maximum intensity projection.czi:0001-0377-0622:c:1/3 - Image 27_Airyscan Processing_Maximum intensity proje	0.336	16056.9	10412	21539	2.265	5391.67	2793909	1	0.882	shIFT88	VC2853	IFT88	0.429707
43	Image 41_Airyscan Processing_Maximum intensity projection.czi:0001-0524-0490:c:1/3 - Image 41_Airyscan Processing_Maximum intensity proje	0.413	11166	10260	14754	2.701	4611.28	2389523	1	1.174	shIFT88	VC2853	IFT88	0.367512
47	Image 30_Airyscan Processing_Maximum intensity projection.czi:0001-0400-0401:c:1/3 - Image 30_Airyscan Processing_Maximum intensity proje	0.774	13006.3	10064	21136	7.228	10064.9	5215529	1	3.59	shIFT88	VC2853	IFT88	0.802155
50	Image 32_Airyscan Processing_Maximum intensity projection.czi:0001-0574-0469:c:1/3 - Image 32_Airyscan Processing_Maximum intensity proje	0.357	13055.9	10615	17175	2.711	4661.12	2415349	1	1.193	shIFT88	VC2853	IFT88	0.371484
54	Image 28_Airyscan Processing_Maximum intensity projection.czi:0001-0637-0570:c:1/3 - Image 28_Airyscan Processing_Maximum intensity proje	1.179	12603.2	10215	18396	9.488	14860.5	7700567	1	4.612	shIFT88	VC2853	IFT88	1.18436
57	Image 31_Airyscan Processing_Maximum intensity projection.czi:0002-0824-0396:c:1/3 - Image 31_Airyscan Processing_Maximum intensity proje	1.743	13357.8	10092	29558	15.6	23277.3	12062070	1	7.42	shIFT88	VC2853	IFT88	1.85516
60	Image 43_Airyscan Processing_Maximum intensity projection.czi:0001-0495-0471:c:1/3 - Image 43_Airyscan Processing_Maximum intensity proje	0.378	15863.5	10446	21367	2.959	6000.19	3109240	1	1.483	shIFT88	VC2853	IFT88	0.478205
63	Image 42_Airyscan Processing_Maximum intensity projection.czi:0001-0253-0702:c:1/3 - Image 42_Airyscan Processing_Maximum intensity proje	0.454	11648.8	10098	16117	3.522	5282.76	2737475	1	1.486	shIFT88	VC2853	IFT88	0.421027
44	Image 8_Airyscan Processing_Maximum intensity projection.czi:0001-0548-0710:c:1/3 - Image 8_Airyscan Processing_Maximum intensity projec	0.332	12826.1	10494	14519	2.21	4257.31	2206094	1	1.696	shIFT88	VC2855	IFT88	0.296988
48	Image 7_Airyscan Processing_Maximum intensity projection.czi:c:1/3 - Image 7_Airyscan Processing_Maximum intensity projec	0.255	14281.8	10140	22728	1.972	3638.04	1885197	1	0.731	shIFT88	VC2855	IFT88	0.253788
51	Image 6_Airyscan Processing_Maximum intensity projection.czi:0001-0666-0497:c:1/3 - Image 6_Airyscan Processing_Maximum intensity projec	0.22	16537.6	9968	27957	1.735	3638.21	1885283	1	0.467	shIFT88	VC2855	IFT88	0.2538
21	Image 33_Airyscan Processing_Maximum intensity projection.czi:c:1/3 - Image 33_Airyscan Processing_Maximum intensity proje	0.563	10099.3	10067	10202	4.237	5690.98	737252	1	2.084	shIFT88	VC2857	IFT88	0.398067
24	Image 35_Airyscan Processing_Maximum intensity projection.czi:0001-0199-0270:c:1/3 - Image 35_Airyscan Processing_Maximum intensity proje	0.78	10125.7	10060	10295	5.735	7894.37	1022697	1	2.691	shIFT88	VC2857	IFT88	0.552188
27	Image 37_Airyscan Processing_Maximum intensity projection.czi:0001-0285-0238:c:1/3 - Image 37_Airyscan Processing_Maximum intensity proje	0.401	10215.3	10084	10386	2.885	4100.39	531195	1	1.279	shIFT88	VC2857	IFT88	0.28681
1	Image 35_Airyscan Processing_Maximum intensity projection.czi:c:1/3 - Image 35_Airyscan Processing_Maximum intensity proje	1.125	10201.2	10060	11033	7.883	11476.9	6324743	1	3.848	shIFT88	VC2905	IFT88	1.14899
4	Image 33_Airyscan Processing_Maximum intensity projection.czi:c:1/3 - Image 33_Airyscan Processing_Maximum intensity proje	0.813	10179.8	10060	11029	6.297	8275.59	4560539	1	2.848	shIFT88	VC2905	IFT88	0.828496
7	Image 32_Airyscan Processing_Maximum intensity projection.czi:c:1/3 - Image 32_Airyscan Processing_Maximum intensity proje	0.463	10428.1	10063	11265	2.757	4825.32	2659154	1	1.11	shIFT88	VC2905	IFT88	0.483078
