# Supplementary material for: Ciliary neuropeptidergic signaling dynamically regulates excitatory synapses in postnatal neocortical pyramidal neurons
Source: eLife. 2021 Mar 2;10:e65427. doi: 10.7554/eLife.65427 (PMC7952091; doi:10.7554/eLife.65427)
Supplement: Figure 1—source data 1. [file elife-65427-fig1-data1.xlsx]

## Sheet: Figure_1
Treatment	Percent
Excitatory	91.7497
Inhibitory	90.9091

## Sheet: Figure_1C
Measurement	Label	Length	GAD+	Dissociation
1	Image 15_Maximum intensity projection.czi:c:1/2 - Image 15_Maximum intensity projection #1	3.32	Y	VC2751
2	Image 15_Maximum intensity projection.czi:c:1/2 - Image 15_Maximum intensity projection #1	7.095	N	VC2751
3	Image 15_Maximum intensity projection.czi:c:2/2 - Image 15_Maximum intensity projection #1	8.562	N	VC2751
4	Image 16_Maximum intensity projection.czi:c:1/2 - Image 16_Maximum intensity projection #1	8.26	Y	VC2751
5	Image 16_Maximum intensity projection.czi:c:1/2 - Image 16_Maximum intensity projection #1	2.29	N	VC2751
6	Image 17_Maximum intensity projection.czi:c:1/2 - Image 17_Maximum intensity projection #1	9.929	Y	VC2751
7	Image 18_Maximum intensity projection.czi:c:1/2 - Image 18_Maximum intensity projection #1	6.214	N	VC2751
8	Image 18_Maximum intensity projection.czi:c:1/2 - Image 18_Maximum intensity projection #1	3.656	N	VC2751
9	Image 19_Maximum intensity projection.czi:c:1/2 - Image 19_Maximum intensity projection #1	5.442	Y	VC2751
10	Image 19_Maximum intensity projection.czi:c:1/2 - Image 19_Maximum intensity projection #1	5.655	Y	VC2751
11	Image 20_Maximum intensity projection.czi:c:2/2 - Image 20_Maximum intensity projection #1	5.985	N	VC2751
12	Image 21_Maximum intensity projection.czi:c:1/2 - Image 21_Maximum intensity projection #1	9.356	N	VC2751
13	Image 21_Maximum intensity projection.czi:c:1/2 - Image 21_Maximum intensity projection #1	5.858	N	VC2751
14	Image 21_Maximum intensity projection.czi:c:1/2 - Image 21_Maximum intensity projection #1	3.65	N	VC2751
15	Image 22_Maximum intensity projection.czi:c:1/2 - Image 22_Maximum intensity projection #1	4.139	N	VC2751
16	Image 23_Maximum intensity projection.czi:c:1/2 - Image 23_Maximum intensity projection #1	2.816	N	VC2751
17	Image 23_Maximum intensity projection.czi:c:1/2 - Image 23_Maximum intensity projection #1	9.285	N	VC2751
1	Excitatory	6.546	N	B6
2	Excitatory	2.307	N	B6
3	Excitatory	4.279	N	B6
4	Excitatory	5.384	N	B6
5	Excitatory	6.04	N	B6
6	Excitatory	5.046	N	B6
7	Excitatory	5.793	N	B6
8	Excitatory	7.229	N	B6
9	Inhibitory	3.844	Y	B6
10	Inhibitory	5.129	Y	B6
11	Inhibitory	3.508	Y	B6
12	Inhibitory	3.784	Y	B6
13	Inhibitory	7.679	Y	B6
14	Inhibitory	6.41	Y	B6
15	Inhibitory	4.916	Y	B6
16	Inhibitory	9.191	Y	B6
17	Inhibitory	7.047	Y	B6
1	Image 14_Airyscan Processing_Maximum intensity projection.czi:c:2/2 - Image 14_Airyscan Processing_Maximum intensity proje	5.964	N	VC2852
2	Image 13_Airyscan Processing_Maximum intensity projection.czi:c:2/2 - Image 13_Airyscan Processing_Maximum intensity proje	10.261	N	VC2852
3	Image 10_Airyscan Processing_Maximum intensity projection.czi:c:2/2 - Image 10_Airyscan Processing_Maximum intensity proje	3.872	N	VC2852
4	Image 12_Airyscan Processing_Maximum intensity projection.czi:c:1/2 - Image 12_Airyscan Processing_Maximum intensity proje	5.422	N	VC2852
5	Image 9_Airyscan Processing_Maximum intensity projection.czi:c:1/2 - Image 9_Airyscan Processing_Maximum intensity projec	3.844	N	VC2852
6	Image 8_Airyscan Processing_Maximum intensity projection.czi:c:2/2 - Image 8_Airyscan Processing_Maximum intensity projec	6.925	N	VC2852
7	Image 6_Airyscan Processing_Maximum intensity projection.czi:c:2/2 - Image 6_Airyscan Processing_Maximum intensity projec	4.374	N	VC2852
8	Image 5_Airyscan Processing_Maximum intensity projection.czi:c:2/2 - Image 5_Airyscan Processing_Maximum intensity projec	8.362	N	VC2852
9	Image 19_Airyscan Processing_Maximum intensity projection.czi:c:2/2 - Image 19_Airyscan Processing_Maximum intensity proje	7.246	Y	VC2852
10	Image 18_Airyscan Processing_Maximum intensity projection.czi:c:2/2 - Image 18_Airyscan Processing_Maximum intensity proje	6.662	Y	VC2852
11	Image 17_Airyscan Processing_Maximum intensity projection.czi:c:2/2 - Image 17_Airyscan Processing_Maximum intensity proje	5.843	Y	VC2852
12	Image 16_Airyscan Processing_Maximum intensity projection.czi:c:1/2 - Image 16_Airyscan Processing_Maximum intensity proje	6.41	Y	VC2852
13	Image 15_Airyscan Processing_Maximum intensity projection.czi:c:2/2 - Image 15_Airyscan Processing_Maximum intensity proje	4.933	Y	VC2852
14	Image 11_Airyscan Processing_Maximum intensity projection.czi:c:2/2 - Image 11_Airyscan Processing_Maximum intensity proje	5.28	Y	VC2852
15	Image 7_Airyscan Processing_Maximum intensity projection.czi:c:2/2 - Image 7_Airyscan Processing_Maximum intensity projec	3.931	Y	VC2852
16	Image 4_Airyscan Processing_Maximum intensity projection.czi:c:2/2 - Image 4_Airyscan Processing_Maximum intensity projec	5.012	Y	VC2852
17	Image 3_Airyscan Processing_Maximum intensity projection.czi:c:2/2 - Image 3_Airyscan Processing_Maximum intensity projec	6.766	Y	VC2852
18	Image 2_Airyscan Processing_Maximum intensity projection.czi:c:2/2 - Image 2_Airyscan Processing_Maximum intensity projec	4.315	Y	VC2852
1	Image 17_Airyscan Processing_Maximum intensity projection.czi:c:1/2 - Image 17_Airyscan Processing_Maximum intensity proje	3.564	N	VC2850
2	Image 16_Airyscan Processing_Maximum intensity projection.czi:c:1/2 - Image 16_Airyscan Processing_Maximum intensity proje	4.023	N	VC2850
3	Image 15_Airyscan Processing_Maximum intensity projection.czi:c:1/2 - Image 15_Airyscan Processing_Maximum intensity proje	2.956	N	VC2850
4	Image 13_2_Airyscan Processing_Maximum intensity projection.czi:c:1/2 - Image 13_Airyscan Processing_Maximum intensity proje	5.538	Y	VC2850
5	Image 13_2_Airyscan Processing_Maximum intensity projection.czi:c:1/2 - Image 13_Airyscan Processing_Maximum intensity proje	3.651	N	VC2850
6	Image 6_Airyscan Processing_Maximum intensity projection.czi:c:1/2 - Image 6_Airyscan Processing_Maximum intensity projec	3.263	N	VC2850
7	Image 5_Airyscan Processing_Maximum intensity projection.czi:c:1/2 - Image 5_Airyscan Processing_Maximum intensity projec	3.453	N	VC2850
8	Image 4_Airyscan Processing_Maximum intensity projection.czi:c:1/2 - Image 4_Airyscan Processing_Maximum intensity projec	4.694	N	VC2850
9	Image 4_Airyscan Processing_Maximum intensity projection.czi:c:1/2 - Image 4_Airyscan Processing_Maximum intensity projec	3.059	N	VC2850
10	Image 19_Airyscan Processing_Maximum intensity projection.czi:c:1/2 - Image 19_Airyscan Processing_Maximum intensity proje	6.443	Y	VC2850
11	Image 12_Airyscan Processing_Maximum intensity projection.czi:c:1/2 - Image 12_Airyscan Processing_Maximum intensity proje	6.437	Y	VC2850
12	Image 11_Airyscan Processing_Maximum intensity projection.czi:c:1/2 - Image 11_Airyscan Processing_Maximum intensity proje	2.719	Y	VC2850
13	Image 10_Airyscan Processing_Maximum intensity projection.czi:c:1/2 - Image 10_Airyscan Processing_Maximum intensity proje	4.399	Y	VC2850
14	Image 9_Airyscan Processing_Maximum intensity projection.czi:c:1/2 - Image 9_Airyscan Processing_Maximum intensity projec	6.748	Y	VC2850
15	Image 8_Airyscan Processing_Maximum intensity projection.czi:c:1/2 - Image 8_Airyscan Processing_Maximum intensity projec	5.144	Y	VC2850
16	Image 7_Airyscan Processing_Maximum intensity projection.czi:c:1/2 - Image 7_Airyscan Processing_Maximum intensity projec	4.276	Y	VC2850
17	Image 2_Airyscan Processing_Maximum intensity projection.czi:c:1/2 - Image 2_Airyscan Processing_Maximum intensity projec	3.591	Y	VC2850
18	Image 1_Airyscan Processing_Maximum intensity projection.czi:c:1/2 - Image 1_Airyscan Processing_Maximum intensity projec	3.062	Y	VC2850
1	MAX_Image 46_Airyscan Processing.czi:1	4.711	N	VC2862
2	MAX_Image 46_Airyscan Processing.czi:1	4.381	N	VC2862
3	MAX_Image 46_Airyscan Processing.czi:1	4.894	N	VC2862
4	MAX_Image 44_Airyscan Processing.czi:1	4.216	N	VC2862
5	MAX_Image 43_Airyscan Processing.czi:2	6.754	N	VC2862
6	MAX_Image 43_Airyscan Processing.czi:2	10.931	N	VC2862
7	MAX_Image 41_Airyscan Processing.czi:1	6.002	N	VC2862
8	MAX_Image 38_Airyscan Processing.czi:1	3.942	N	VC2862
9	MAX_Image 37_Airyscan Processing.czi:1	5.828	N	VC2862
10	MAX_Image 37_Airyscan Processing.czi:1	3.226	N	VC2862
11	MAX_Image 44_Airyscan Processing.czi:1	4.999	Y	VC2862
12	MAX_Image 43_Airyscan Processing.czi:2	7.823	Y	VC2862
13	MAX_Image 43_Airyscan Processing.czi:2	6.318	Y	VC2862
14	MAX_Image 42_Airyscan Processing.czi:2	8.493	Y	VC2862
15	MAX_Image 41_Airyscan Processing.czi:1	6.171	Y	VC2862
16	MAX_Image 40_Airyscan Processing.czi:2	5.028	Y	VC2862
17	MAX_Image 39_Airyscan Processing.czi:1	5.474	Y	VC2862
18	MAX_Image 39_Airyscan Processing.czi:1	3.334	Y	VC2862
19	MAX_Image 38_Airyscan Processing.czi:1	3.307	Y	VC2862
20	MAX_Image 38_Airyscan Processing.czi:1	3.652	Y	VC2862

## Sheet: Figure_1E_F
Figure	Image	Area	Mean	Min	Max	Perimeter	IntDen	RawIntDen	Ch	Length	Treatment	Dissociation	NormInt	Channel
37	MAX_Image 80_Airyscan Processing.tif:0003-0582-0666:1	1.034	15025	11174	23026	7.809	15541.4	8053391	1	3.126	CTL	VC2847	0.857967	ARL13b
39	MAX_Image 79_Airyscan Processing.tif:0001-0357-0546:1	1.953	13879.8	10583	21585	11.507	27106.6	14046374	1	4.737	CTL	VC2847	1.49643	ARL13b
46	MAX_Image 77_Airyscan Processing.tif:77:1	1.519	13556.3	10450	18644	10.817	20588.6	10668815	1	5.309	CTL	VC2847	1.1366	ARL13b
49	MAX_Image 76_Airyscan Processing.tif:76:1	1.443	13499.4	10505	20863	9.435	19486.2	10097585	1	4.042	CTL	VC2847	1.07575	ARL13b
52	MAX_Image 74_Airyscan Processing.tif:74:1	1.218	14779.7	10897	19987	7.478	17997.2	9325968	1	3.11	CTL	VC2847	0.993541	ARL13b
55	MAX_Image 19_Airyscan Processing.tif:19:1	0.718	19119.8	11571	26705	4.546	13725.8	7112568	1	1.803	CTL	VC2847	0.757737	ARL13b
58	MAX_Image 18_Airyscan Processing.tif:18:1	0.797	15499.9	10448	20167	3.85	12353.5	6401475	1	2.865	CTL	VC2847	0.68198	ARL13b
38	MAX_Image 80_Airyscan Processing.tif:0003-0582-0666:2	1.034	15911.4	11045	23562	7.809	16458.3	8528524	2	3.126	CTL	VC2847	0.80066	AC3
40	MAX_Image 79_Airyscan Processing.tif:0001-0357-0546:2	1.953	15973.8	10482	31586	11.507	31196.1	16165505	2	4.737	CTL	VC2847	1.51762	AC3
47	MAX_Image 77_Airyscan Processing.tif:77:2	1.519	13263.6	10576	16633	10.817	20144	10438421	2	5.309	CTL	VC2847	0.979961	AC3
50	MAX_Image 76_Airyscan Processing.tif:76:2	1.443	15720.6	10408	30622	9.435	22692.4	11758990	2	4.042	CTL	VC2847	1.10394	AC3
53	MAX_Image 74_Airyscan Processing.tif:74:2	1.218	16632.7	11664	22930	7.478	20253.7	10495258	2	3.11	CTL	VC2847	0.985297	AC3
56	MAX_Image 19_Airyscan Processing.tif:19:2	0.718	26666.7	12747	46383	4.546	19143.6	9920005	2	1.803	CTL	VC2847	0.931292	AC3
59	MAX_Image 18_Airyscan Processing.tif:18:2	0.797	17569.9	10391	24633	3.85	14003.3	7256379	2	2.865	CTL	VC2847	0.681231	AC3
60	MAX_Image 84_Airyscan Processing-1.tif:84:1	0.637	20160.4	12629	24803	3.492	12838.8	6652923	1	2.382	shARL13b_1	VC2847	0.708768	ARL13b
63	MAX_Image 83_Airyscan Processing.tif:83:1	0.529	17403	12588	24353	4.294	9202.07	4768423	1	2.459	shARL13b_1	VC2847	0.508003	ARL13b
70	MAX_Image 81_Airyscan Processing.tif:8`:1	0.596	11125.1	10223	12605	7.089	6633.98	3437664	1	3.282	shARL13b_1	VC2847	0.366231	ARL13b
73	MAX_Image 17_Airyscan Processing.tif:17:1	0.606	14201.3	10939	17084	4.387	8605.35	4459207	1	1.797	shARL13b_1	VC2847	0.475061	ARL13b
76	MAX_Image 16_Airyscan Processing-1.tif:16:1	0.83	14349.6	11872	16634	5.989	11907.4	6170323	1	2.677	shARL13b_1	VC2847	0.657355	ARL13b
83	MAX_Image 15_Airyscan Processing-2.tif:0001-0351-0498:1	0.795	15690.9	11630	19375	5.337	12475.4	6464644	1	2.36	shARL13b_1	VC2847	0.68871	ARL13b
85	MAX_Image 14_Airyscan Processing.tif:14:1	0.546	10074.4	10016	10238	5.351	5501.95	2851059	1	1.982	shARL13b_1	VC2847	0.303737	ARL13b
92	MAX_Image 11_Airyscan Processing.tif:1	0.714	16580.6	12157	20451	4.976	11838.9	6134814	1	2.059	shARL13b_1	VC2847	0.653572	ARL13b
95	MAX_Image 10_Airyscan Processing.tif:10:1	0.465	18310.7	12496	22957	3.905	8515.95	4412885	1	1.65	shARL13b_1	VC2847	0.470126	ARL13b
61	MAX_Image 84_Airyscan Processing-1.tif:84:2	0.637	26289.8	13434	32938	3.492	16742.2	8675638	2	2.382	shARL13b_1	VC2847	0.814471	AC3
64	MAX_Image 83_Airyscan Processing.tif:83:2	0.529	20741.8	13086	33175	4.294	10967.5	5683259	2	2.459	shARL13b_1	VC2847	0.533546	AC3
69	MAX_Image 81_Airyscan Processing.tif:8`:2	0.596	11704.1	10292	13796	7.089	6979.26	3616582	2	3.282	shARL13b_1	VC2847	0.339526	AC3
74	MAX_Image 17_Airyscan Processing.tif:17:2	0.606	16993.5	12030	21703	4.387	10297.3	5335953	2	1.797	shARL13b_1	VC2847	0.500941	AC3
77	MAX_Image 16_Airyscan Processing-1.tif:16:2	0.83	15348.8	11419	17879	5.989	12736.6	6599996	2	2.677	shARL13b_1	VC2847	0.619609	AC3
82	MAX_Image 15_Airyscan Processing-2.tif:0001-0351-0498:2	0.795	16138.1	11027	19397	5.337	12831	6648894	2	2.36	shARL13b_1	VC2847	0.6242	AC3
86	MAX_Image 14_Airyscan Processing.tif:14:2	0.546	11227.8	10360	12088	5.351	6131.87	3177477	2	1.982	shARL13b_1	VC2847	0.298302	AC3
93	MAX_Image 11_Airyscan Processing.tif:2	0.714	15858.3	11891	20727	4.976	11323.2	5867589	2	2.059	shARL13b_1	VC2847	0.550851	AC3
96	MAX_Image 10_Airyscan Processing.tif:10:2	0.465	23312.3	12353	31491	3.905	10842.1	5618268	2	1.65	shARL13b_1	VC2847	0.527444	AC3
4	MAX_Image 8_Airyscan Processing.tif:0001-0306-0531:1	1.685	12389.6	10056	16098	14.192	20872.9	10816152	1	6.428	shARL13b_2	VC2847	1.1523	ARL13b
107	MAX_Image 6_Airyscan Processing.tif:0001-0494-0515:1	1.223	11106.6	10151	13176	9.683	13588.8	7041600	1	4.018	shARL13b_2	VC2847	0.750176	ARL13b
14	MAX_Image 5_Airyscan Processing.tif:0001-0514-0528:1	0.303	30091.5	14435	51138	2.094	9117.05	4724366	1	0.708	shARL13b_2	VC2847	0.50331	ARL13b
17	MAX_Image 4_Airyscan Processing.tif:0001-0374-0407:1	0.785	15759.6	10791	23604	4.447	12378	6414163	1	1.75	shARL13b_2	VC2847	0.683332	ARL13b
20	MAX_Image 3_Airyscan Processing.tif:0001-0403-0426:1	0.65	14493.6	10378	21156	4.047	9425.8	4884357	1	1.627	shARL13b_2	VC2847	0.520354	ARL13b
23	MAX_Image 2_Airyscan Processing.tif:1	0.459	11676	10381	13445	3.508	5362.68	2778887	1	1.396	shARL13b_2	VC2847	0.296048	ARL13b
5	MAX_Image 8_Airyscan Processing.tif:0001-0306-0531:2	1.685	14387.4	10103	20758	14.192	24238.6	12560186	2	6.428	shARL13b_2	VC2847	1.17915	AC3
108	MAX_Image 6_Airyscan Processing.tif:0001-0494-0515:2	1.223	11841.9	10180	15888	9.683	14488.4	7507741	2	4.018	shARL13b_2	VC2847	0.704829	AC3
15	MAX_Image 5_Airyscan Processing.tif:0001-0514-0528:2	0.303	26741.5	13172	46281	2.094	8102.08	4198418	2	0.708	shARL13b_2	VC2847	0.394148	AC3
18	MAX_Image 4_Airyscan Processing.tif:0001-0374-0407:2	0.785	16426.7	10512	26768	4.447	12902	6685666	2	1.75	shARL13b_2	VC2847	0.627652	AC3
21	MAX_Image 3_Airyscan Processing.tif:0001-0403-0426:2	0.65	13729.7	10529	19217	4.047	8929	4626922	2	1.627	shARL13b_2	VC2847	0.434377	AC3
24	MAX_Image 2_Airyscan Processing.tif:2	0.459	13537	10305	19217	3.508	6217.44	3221818	2	1.396	shARL13b_2	VC2847	0.302465	AC3
1	MAX_Image 51_Airyscan Processing.tif:0001-0148-0528:1	1.139	14136.7	11103	18151	9.463	16095.7	8340642	1	4.318	CTL	VC2848	0.945638	ARL13b
9	MAX_Image 48_Airyscan Processing.tif:48:1	0.783	15563.7	11052	23064	5.082	12194.1	6318871	1	2.922	CTL	VC2848	0.716415	ARL13b
18	MAX_Image 47_Airyscan Processing.tif:0001-0545-0599:1	1.594	13387.6	10734	16803	10.929	21339.9	11058147	1	4.936	CTL	VC2848	1.25374	ARL13b
22	MAX_Image 15_Airyscan Processing.tif:0002-0401-0498:1	1.108	12076.9	10319	14915	8.582	13377.6	6932143	1	3.806	CTL	VC2848	0.785946	ARL13b
25	MAX_Image 14_Airyscan Processing.tif:14:1	0.917	13452.6	10282	23956	6.993	12331.4	6390005	1	3.158	CTL	VC2848	0.72448	ARL13b
29	MAX_Image 13_Airyscan Processing.tif:13:1	0.654	15230	11031	21125	5.445	9963.46	5162968	1	2.379	CTL	VC2848	0.585362	ARL13b
32	MAX_Image 12_Airyscan Processing.tif:0002-0411-0434:1	1.901	13829.5	10896	18518	13.064	26287.7	13622054	1	5.953	CTL	VC2848	1.54443	ARL13b
34	MAX_Image 11_Airyscan Processing.tif:0001-0692-0355:1	1.602	15344.8	10768	21547	10.488	24578.1	12736145	1	4.644	CTL	VC2848	1.44399	ARL13b
2	MAX_Image 51_Airyscan Processing.tif:0001-0148-0528:2	1.139	21962.3	12023	34630	9.463	25005.8	12957751	2	4.318	CTL	VC2848	1.14749	AC3
10	MAX_Image 48_Airyscan Processing.tif:48:2	0.783	24801.5	11984	45165	5.082	19431.8	10069394	2	2.922	CTL	VC2848	0.891705	AC3
19	MAX_Image 47_Airyscan Processing.tif:0001-0545-0599:2	1.594	14430.5	10783	19905	10.929	23002.4	11919634	2	4.936	CTL	VC2848	1.05555	AC3
21	MAX_Image 15_Airyscan Processing.tif:0002-0401-0498:2	1.108	15572.2	11000	24572	8.582	17249.3	8938439	2	3.806	CTL	VC2848	0.791552	AC3
26	MAX_Image 14_Airyscan Processing.tif:14:2	0.917	14968.6	10855	31683	6.993	13721	7110075	2	3.158	CTL	VC2848	0.629639	AC3
28	MAX_Image 13_Airyscan Processing.tif:13:2	0.654	19186.5	11378	28404	5.445	12551.8	6504236	2	2.379	CTL	VC2848	0.575989	AC3
31	MAX_Image 12_Airyscan Processing.tif:0002-0411-0434:2	1.901	21168.2	10914	36980	13.064	40237.5	20850679	2	5.953	CTL	VC2848	1.84645	AC3
35	MAX_Image 11_Airyscan Processing.tif:0001-0692-0355:2	1.602	14443.6	10847	20354	10.488	23134.7	11988178	2	4.644	CTL	VC2848	1.06162	AC3
111	MAX_Image 45_Airyscan Processing.tif:0001-0362-0405:1	0.716	20223.3	11236	26035	6.052	14478.9	7502837	1	2.612	shARL13b_1	VC2848	0.85065	ARL13b
114	MAX_Image 44_Airyscan Processing.tif:0001-0475-0408:1	0.897	19230.4	12442	28547	6.205	17256.4	8942118	1	2.945	shARL13b_1	VC2848	1.01383	ARL13b
117	MAX_Image 43_Airyscan Processing.tif:0001-0384-0537:1	0.739	17312.6	11300	26462	4.92	12795.9	6630729	1	2.112	shARL13b_1	VC2848	0.751773	ARL13b
121	MAX_Image 42_Airyscan Processing.tif:0001-0487-0428:1	0.766	15769.6	10738	22758	5.884	12081.5	6260522	1	2.575	shARL13b_1	VC2848	0.7098	ARL13b
124	MAX_Image 41_Airyscan Processing.tif:0001-0312-0656:1	0.49	20292.1	11103	30358	2.693	9946.51	5154184	1	0.972	shARL13b_1	VC2848	0.584367	ARL13b
131	MAX_Image 8_Airyscan Processing.tif:0001-0504-0602:1	0.583	14148.7	11142	17174	3.337	8245.83	4272911	1	1.595	shARL13b_1	VC2848	0.48445	ARL13b
134	MAX_Image 7_Airyscan Processing.tif:0001-0642-0589:1	1.031	14644.9	10440	19549	8.603	15091.8	7820401	1	3.957	shARL13b_1	VC2848	0.886655	ARL13b
137	MAX_Image 6_Airyscan Processing.tif:0002-0509-0485:1	0.895	12147.1	10887	14068	9.718	10876.8	5636232	1	4.16	shARL13b_1	VC2848	0.63902	ARL13b
148	MAX_Image 4_Airyscan Processing.tif:0001-0524-0307:1	0.712	14445.5	11053	20536	5.458	10286.6	5330403	1	2.562	shARL13b_1	VC2848	0.604346	ARL13b
152	MAX_Image 3_Airyscan Processing.tif:0001-0455-0603:1	0.369	16831	11720	21731	2.265	6203.74	3214720	1	1.337	shARL13b_1	VC2848	0.364476	ARL13b
112	MAX_Image 45_Airyscan Processing.tif:0001-0362-0405:2	0.716	31881.1	14085	45275	6.052	22825.3	11827873	2	2.612	shARL13b_1	VC2848	1.04743	AC3
115	MAX_Image 44_Airyscan Processing.tif:0001-0475-0408:2	0.897	19282	11739	29129	6.205	17302.7	8966114	2	2.945	shARL13b_1	VC2848	0.794003	AC3
118	MAX_Image 43_Airyscan Processing.tif:0001-0384-0537:2	0.739	21085.5	11628	34527	4.92	15584.5	8075760	2	2.112	shARL13b_1	VC2848	0.715156	AC3
122	MAX_Image 42_Airyscan Processing.tif:0001-0487-0428:2	0.766	20452.1	12369	33118	5.884	15669	8119502	2	2.575	shARL13b_1	VC2848	0.71903	AC3
125	MAX_Image 41_Airyscan Processing.tif:0001-0312-0656:2	0.49	34337.9	12835	59736	2.693	16831.3	8721830	2	0.972	shARL13b_1	VC2848	0.77237	AC3
132	MAX_Image 8_Airyscan Processing.tif:0001-0504-0602:2	0.583	22104.5	12279	28740	3.337	12882.5	6675565	2	1.595	shARL13b_1	VC2848	0.591161	AC3
135	MAX_Image 7_Airyscan Processing.tif:0001-0642-0589:2	1.031	17238.2	11346	25994	8.603	17764.1	9205195	2	3.957	shARL13b_1	VC2848	0.815175	AC3
138	MAX_Image 6_Airyscan Processing.tif:0002-0509-0485:2	0.895	13389.8	11204	16541	9.718	11989.5	6212853	2	4.16	shARL13b_1	VC2848	0.550185	AC3
149	MAX_Image 4_Airyscan Processing.tif:0001-0524-0307:2	0.712	24228.4	13108	43479	5.458	17252.9	8940283	2	2.562	shARL13b_1	VC2848	0.791715	AC3
153	MAX_Image 3_Airyscan Processing.tif:0001-0455-0603:2	0.369	21012.5	13387	27699	2.265	7744.99	4013380	2	1.337	shARL13b_1	VC2848	0.355409	AC3
42	MAX_Image 40_Airyscan Processing.tif:40n:1	0.895	19029.6	11891	31660	6.731	17039.5	8829716	1	2.919	shARL13b_2	VC2848	1.00109	ARL13b
51	MAX_Image 37_Airyscan Processing.tif:37:1	0.733	18779.1	11246	29595	4.574	13771.1	7136055	1	1.921	shARL13b_2	VC2848	0.809065	ARL13b
61	MAX_Image 35_Airyscan Processing.tif:0002-0644-0698:1	0.477	19599.4	13032	25913	3.591	9342.21	4841042	1	1.473	shARL13b_2	VC2848	0.548863	ARL13b
63	MAX_Image 34_Airyscan Processing.tif:0001-0715-0565:1	0.629	17212.7	11258	23480	3.971	10828.7	5611324	1	1.339	shARL13b_2	VC2848	0.636196	ARL13b
69	MAX_Image 33_Airyscan Processing.tif:33:1	0.621	10298.5	10051	10809	3.351	6399.4	3316108	1	1.144	shARL13b_2	VC2848	0.375971	ARL13b
76	MAX_Image 31_Airyscan Processing.tif:31:1	0.482	17767.9	10908	27733	3.365	8572.11	4441985	1	1.218	shARL13b_2	VC2848	0.503619	ARL13b
79	MAX_Image 30_Airyscan Processing.tif:0002-0582-0215:1	0.226	18483.1	12359	27612	1.844	4173.23	2162528	1	0.573	shARL13b_2	VC2848	0.245181	ARL13b
85	MAX_Image 26_Airyscan Processing.tif:26:1	0.295	22180.9	12907	31438	2.04	6549.09	3393674	1	0.527	shARL13b_2	VC2848	0.384765	ARL13b
94	MAX_Image 22_Airyscan Processing.tif:0002-0506-0442:1	0.61	21270.8	11494	29741	3.854	12971.2	6721565	1	1.544	shARL13b_2	VC2848	0.762072	ARL13b
97	MAX_Image 21_Airyscan Processing.tif:21:1	0.309	29423	12708	47498	2.163	9084.84	4707675	1	0.629	shARL13b_2	VC2848	0.533743	ARL13b
103	MAX_Image 19_Airyscan Processing.tif:19:1	0.969	14010.5	10376	18773	7.028	13572.8	7033282	1	2.897	shARL13b_2	VC2848	0.797413	ARL13b
106	MAX_Image 18_Airyscan Processing.tif:18:1	0.222	11704.5	10456	12608	1.945	2597.53	1346016	1	0.601	shARL13b_2	VC2848	0.152607	ARL13b
109	MAX_Image 17_Airyscan Processing.tif:0002-0625-0650:1	0.251	19219.7	12452	28468	1.888	4821.7	2498557	1	0.615	shARL13b_2	VC2848	0.283279	ARL13b
41	MAX_Image 40_Airyscan Processing.tif:40n:2	0.895	24101.2	13148	40867	6.731	21580.8	11182966	2	2.919	shARL13b_2	VC2848	0.990318	AC3
52	MAX_Image 37_Airyscan Processing.tif:37:2	0.733	22598.3	12428	39302	4.574	16571.8	8587365	2	1.921	shARL13b_2	VC2848	0.760462	AC3
60	MAX_Image 35_Airyscan Processing.tif:0002-0644-0698:2	0.477	26084.6	12348	36328	3.591	12433.4	6442888	2	1.473	shARL13b_2	VC2848	0.570556	AC3
64	MAX_Image 34_Airyscan Processing.tif:0001-0715-0565:2	0.629	19024.2	12071	26388	3.971	11968.4	6201895	2	1.339	shARL13b_2	VC2848	0.549215	AC3
68	MAX_Image 33_Airyscan Processing.tif:33:2	0.621	10952	10328	11875	3.351	6805.51	3526549	2	1.144	shARL13b_2	VC2848	0.312297	AC3
75	MAX_Image 31_Airyscan Processing.tif:31:2	0.482	29440.7	12920	52826	3.365	14203.6	7360178	2	1.218	shARL13b_2	VC2848	0.651787	AC3
78	MAX_Image 30_Airyscan Processing.tif:0002-0582-0215:2	0.226	16717	11566	23218	1.844	3774.45	1955885	2	0.573	shARL13b_2	VC2848	0.173205	AC3
84	MAX_Image 26_Airyscan Processing.tif:26:2	0.295	27761.5	13183	41052	2.04	8196.8	4247503	2	0.527	shARL13b_2	VC2848	0.376142	AC3
93	MAX_Image 22_Airyscan Processing.tif:0002-0506-0442:2	0.61	25525.6	12914	37074	3.854	15565.9	8066092	2	1.544	shARL13b_2	VC2848	0.7143	AC3
96	MAX_Image 21_Airyscan Processing.tif:21:2	0.309	34071.5	13438	53368	2.163	10520.2	5451440	2	0.629	shARL13b_2	VC2848	0.482757	AC3
102	MAX_Image 19_Airyscan Processing.tif:19:2	0.969	17866.8	11274	25575	7.028	17308.6	8969150	2	2.897	shARL13b_2	VC2848	0.794271	AC3
105	MAX_Image 18_Airyscan Processing.tif:18:2	0.222	11849.5	10599	13270	1.945	2629.71	1362688	2	0.601	shARL13b_2	VC2848	0.120674	AC3
108	MAX_Image 17_Airyscan Processing.tif:0002-0625-0650:2	0.251	20348.6	12493	30905	1.888	5104.9	2645312	2	0.615	shARL13b_2	VC2848	0.234258	AC3
1	Image 7_Airyscan Processing_Maximum intensity projection.czi:0001-0492-0490:c:1/3 - Image 7_Airyscan Processing_Maximum intensity projec	0.921	13841.7	10482	20498	6.329	12741.4	6602477	1	3.046	CTL	VC2851	0.954855	ARL13b
3	Image 22_Airyscan Processing_Maximum intensity projection.czi:0001-0452-0722:c:1/3 - Image 22_Airyscan Processing_Maximum intensity proje	1.619	12698.2	10520	18982	9.529	20559.7	10653822	1	4.143	CTL	VC2851	1.54076	ARL13b
7	Image 25_Airyscan Processing_Maximum intensity projection.czi:0001-0494-0534:c:1/3 - Image 25_Airyscan Processing_Maximum intensity proje	1.146	13165	10636	17450	7.717	15091	7819990	1	3.707	CTL	VC2851	1.13093	ARL13b
10	Image 21_Airyscan Processing_Maximum intensity projection.czi:0001-0411-0541:c:1/3 - Image 21_Airyscan Processing_Maximum intensity proje	0.372	18862.8	11035	28154	2.254	7025.44	3640516	1	1.224	CTL	VC2851	0.526494	ARL13b
13	Image 24_Airyscan Processing_Maximum intensity projection.czi:0001-0251-0452:c:1/3 - Image 24_Airyscan Processing_Maximum intensity proje	1.287	11581.5	10330	14279	7.471	14907.4	7724894	1	3.347	CTL	VC2851	1.11718	ARL13b
16	Image 4_Airyscan Processing_Maximum intensity projection.czi:c:1/3 - Image 4_Airyscan Processing_Maximum intensity projec	1.64	11141.6	10132	13235	10.597	18275.8	9470363	1	4.802	CTL	VC2851	1.36961	ARL13b
19	Image 23_Airyscan Processing_Maximum intensity projection.czi:0001-0359-0542:c:1/3 - Image 23_Airyscan Processing_Maximum intensity proje	0.374	12052	10407	14042	2.407	4512.02	2338086	1	1.09	CTL	VC2851	0.338136	ARL13b
22	Image 6_Airyscan Processing_Maximum intensity projection.czi:0001-0516-0435:c:1/3 - Image 6_Airyscan Processing_Maximum intensity projec	1.214	11235.2	10172	12936	8.217	13637.7	7066940	1	3.59	CTL	VC2851	1.02203	ARL13b
2	Image 7_Airyscan Processing_Maximum intensity projection.czi:0001-0492-0490:c:2/3 - Image 7_Airyscan Processing_Maximum intensity projec	0.921	21806.3	11428	42187	6.329	20073	10401628	2	3.046	CTL	VC2851	0.685932	AC3
4	Image 22_Airyscan Processing_Maximum intensity projection.czi:0001-0452-0722:c:2/3 - Image 22_Airyscan Processing_Maximum intensity proje	1.619	33301.6	13556	65535	9.529	53918.6	27940072	2	4.143	CTL	VC2851	1.8425	AC3
8	Image 25_Airyscan Processing_Maximum intensity projection.czi:0001-0494-0534:c:2/3 - Image 25_Airyscan Processing_Maximum intensity proje	1.146	28528.7	12848	52321	7.717	32702.4	16946058	2	3.707	CTL	VC2851	1.1175	AC3
11	Image 21_Airyscan Processing_Maximum intensity projection.czi:0001-0411-0541:c:2/3 - Image 21_Airyscan Processing_Maximum intensity proje	0.372	46441.6	19382	65535	2.254	17297.2	8963236	2	1.224	CTL	VC2851	0.591077	AC3
14	Image 24_Airyscan Processing_Maximum intensity projection.czi:0001-0251-0452:c:2/3 - Image 24_Airyscan Processing_Maximum intensity proje	1.287	26251	11958	58411	7.471	33789.6	17509444	2	3.347	CTL	VC2851	1.15465	AC3
17	Image 4_Airyscan Processing_Maximum intensity projection.czi:c:2/3 - Image 4_Airyscan Processing_Maximum intensity projec	1.64	23574.7	12366	42168	10.597	38670.2	20038516	2	4.802	CTL	VC2851	1.32143	AC3
20	Image 23_Airyscan Processing_Maximum intensity projection.czi:0001-0359-0542:c:2/3 - Image 23_Airyscan Processing_Maximum intensity proje	0.374	37839.4	15910	56208	2.407	14166.3	7340852	2	1.09	CTL	VC2851	0.48409	AC3
23	Image 6_Airyscan Processing_Maximum intensity projection.czi:0001-0516-0435:c:2/3 - Image 6_Airyscan Processing_Maximum intensity projec	1.214	19354.6	11554	32029	8.217	23493.4	12174048	2	3.59	CTL	VC2851	0.802813	AC3
27	Image 13_Airyscan Processing_Maximum intensity projection.czi:0001-0384-0511:c:1/3 - Image 13_Airyscan Processing_Maximum intensity proje	0.592	12496.8	10377	14687	4.729	7403.68	3836517	1	2.001	shARL13b_1	VC2851	0.55484	ARL13b
30	Image 11_Airyscan Processing_Maximum intensity projection.czi:0001-0605-0403:c:1/3 - Image 11_Airyscan Processing_Maximum intensity proje	0.247	21379.5	13336	31893	1.831	5281.02	2736576	1	0.529	shARL13b_1	VC2851	0.395766	ARL13b
33	Image 8_Airyscan Processing_Maximum intensity projection.czi:0001-0561-0123:c:1/3 - Image 8_Airyscan Processing_Maximum intensity projec	0.577	13024	10643	16330	3.467	7514.93	3894166	1	1.179	shARL13b_1	VC2851	0.563177	ARL13b
38	Image 32_Airyscan Processing_Maximum intensity projection.czi:0001-0535-0837:c:1/3 - Image 32_Airyscan Processing_Maximum intensity proje	1.878	11244.8	10063	12656	11.875	21114.3	10941207	1	5.242	shARL13b_1	VC2851	1.58233	ARL13b
41	Image 12_Airyscan Processing_Maximum intensity projection.czi:0001-0489-0400:c:1/3 - Image 12_Airyscan Processing_Maximum intensity proje	0.563	11490.1	10366	13856	4.712	6474.65	3355102	1	2.007	shARL13b_1	VC2851	0.485217	ARL13b
44	Image 14_Airyscan Processing_Maximum intensity projection.czi:14:c:1/3 - Image 14_Airyscan Processing_Maximum intensity proje	0.326	17797.6	10740	28271	2.281	5804.42	3007794	1	1.017	shARL13b_1	VC2851	0.434989	ARL13b
47	Image 30_Airyscan Processing_Maximum intensity projection.czi:0001-0517-0551:c:1/3 - Image 30_Airyscan Processing_Maximum intensity proje	0.618	13290.5	10812	16529	5.463	8207.35	4252972	1	2.351	shARL13b_1	VC2851	0.615068	ARL13b
50	Image 9_Airyscan Processing_Maximum intensity projection.czi:0001-0596-0390:c:1/3 - Image 9_Airyscan Processing_Maximum intensity projec	0.367	14108.6	10869	18610	2.354	5173.07	2680636	1	0.795	shARL13b_1	VC2851	0.387676	ARL13b
53	Image 10_Airyscan Processing_Maximum intensity projection.czi:0001-0423-0296:c:1/3 - Image 10_Airyscan Processing_Maximum intensity proje	0.679	13357	10907	16348	4.895	9073.23	4701659	1	2.071	shARL13b_1	VC2851	0.679958	ARL13b
28	Image 13_Airyscan Processing_Maximum intensity projection.czi:0001-0384-0511:c:2/3 - Image 13_Airyscan Processing_Maximum intensity proje	0.592	41513.3	11856	62955	4.729	24594.4	12744578	2	2.001	shARL13b_1	VC2851	0.840437	AC3
31	Image 11_Airyscan Processing_Maximum intensity projection.czi:0001-0605-0403:c:2/3 - Image 11_Airyscan Processing_Maximum intensity proje	0.247	50417	19657	65535	1.831	12453.7	6453371	2	0.529	shARL13b_1	VC2851	0.425565	AC3
34	Image 8_Airyscan Processing_Maximum intensity projection.czi:0001-0561-0123:c:2/3 - Image 8_Airyscan Processing_Maximum intensity projec	0.577	28945.7	15172	46908	3.467	16701.9	8654756	2	1.179	shARL13b_1	VC2851	0.570735	AC3
39	Image 32_Airyscan Processing_Maximum intensity projection.czi:0001-0535-0837:c:2/3 - Image 32_Airyscan Processing_Maximum intensity proje	1.878	30250.5	12587	53800	11.875	56800.9	29433695	2	5.242	shARL13b_1	VC2851	1.94099	AC3
42	Image 12_Airyscan Processing_Maximum intensity projection.czi:0001-0489-0400:c:2/3 - Image 12_Airyscan Processing_Maximum intensity proje	0.563	27723.4	14293	53695	4.712	15622.1	8095219	2	2.007	shARL13b_1	VC2851	0.533836	AC3
45	Image 14_Airyscan Processing_Maximum intensity projection.czi:14:c:2/3 - Image 14_Airyscan Processing_Maximum intensity proje	0.326	42049.1	16719	65535	2.281	13713.7	7106301	2	1.017	shARL13b_1	VC2851	0.468623	AC3
48	Image 30_Airyscan Processing_Maximum intensity projection.czi:0001-0517-0551:c:2/3 - Image 30_Airyscan Processing_Maximum intensity proje	0.618	32919.6	14196	56874	5.463	20329	10534274	2	2.351	shARL13b_1	VC2851	0.694679	AC3
51	Image 9_Airyscan Processing_Maximum intensity projection.czi:0001-0596-0390:c:2/3 - Image 9_Airyscan Processing_Maximum intensity projec	0.367	54056.8	16647	65535	2.354	19820.5	10270793	2	0.795	shARL13b_1	VC2851	0.677304	AC3
54	Image 10_Airyscan Processing_Maximum intensity projection.czi:0001-0423-0296:c:2/3 - Image 10_Airyscan Processing_Maximum intensity proje	0.679	33250.9	12224	58314	4.895	22586.9	11704327	2	2.071	shARL13b_1	VC2851	0.771838	AC3
59	Image 16_Airyscan Processing_Maximum intensity projection.czi:0001-0479-0541:c:1/3 - Image 16_Airyscan Processing_Maximum intensity proje	0.421	11030.2	10342	11742	3.003	4640.33	2404574	1	1.283	shARL13b_2	VC2851	0.347751	ARL13b
61	Image 19_Airyscan Processing_Maximum intensity projection.czi:c:1/3 - Image 19_Airyscan Processing_Maximum intensity proje	0.305	17268.8	13085	21884	2.625	5265.37	2728466	1	1.227	shARL13b_2	VC2851	0.394593	ARL13b
62	Image 19_Airyscan Processing_Maximum intensity projection.czi:c:1/3 - Image 19_Airyscan Processing_Maximum intensity proje	0.305	17268.8	13085	21884	2.625	5265.37	2728466	1	1.227	shARL13b_2	VC2851	0.394593	ARL13b
64	Image 26_Airyscan Processing_Maximum intensity projection.czi:0001-0391-0563:c:1/3 - Image 26_Airyscan Processing_Maximum intensity proje	0.284	15124.6	11289	18772	1.997	4290.54	2223318	1	0.912	shARL13b_2	VC2851	0.321538	ARL13b
67	Image 17_Airyscan Processing_Maximum intensity projection.czi:0002-0460-0369:c:1/3 - Image 17_Airyscan Processing_Maximum intensity proje	0.349	14730	11199	19630	2.243	5145.06	2666122	1	1.214	shARL13b_2	VC2851	0.385577	ARL13b
70	Image 20_Airyscan Processing_Maximum intensity projection.czi:0001-0631-0442:c:1/3 - Image 20_Airyscan Processing_Maximum intensity proje	0.363	14571.5	11325	17804	2.577	5286.57	2739451	1	1.037	shARL13b_2	VC2851	0.396182	ARL13b
74	Image 29_Airyscan Processing_Maximum intensity projection.czi:0001-0418-0581:c:1/3 - Image 29_Airyscan Processing_Maximum intensity proje	0.944	12050.6	10368	13865	6.561	11371.8	5892747	1	2.875	shARL13b_2	VC2851	0.852214	ARL13b
77	Image 18_Airyscan Processing_Maximum intensity projection.czi:0001-0531-0531:c:1/3 - Image 18_Airyscan Processing_Maximum intensity proje	0.616	13736.7	10970	16339	4.509	8456.34	4381996	1	1.824	shARL13b_2	VC2851	0.633728	ARL13b
80	Image 27_Airyscan Processing_Maximum intensity projection.czi:0001-0533-0609:c:1/3 - Image 27_Airyscan Processing_Maximum intensity proje	0.338	19146.8	10989	28163	2.308	6466.15	3350696	1	0.758	shARL13b_2	VC2851	0.48458	ARL13b
83	Image 28_Airyscan Processing_Maximum intensity projection.czi:0001-0550-0504:c:1/3 - Image 28_Airyscan Processing_Maximum intensity proje	0.436	14559.1	11273	19604	3.137	6349.71	3290357	1	1.037	shARL13b_2	VC2851	0.475854	ARL13b
60	Image 16_Airyscan Processing_Maximum intensity projection.czi:0001-0479-0541:c:2/3 - Image 16_Airyscan Processing_Maximum intensity proje	0.421	38224.6	12241	58874	3.003	16080.9	8332972	2	1.283	shARL13b_2	VC2851	0.549515	AC3
65	Image 26_Airyscan Processing_Maximum intensity projection.czi:0001-0391-0563:c:2/3 - Image 26_Airyscan Processing_Maximum intensity proje	0.284	51717.7	24170	64545	1.997	14671.3	7602508	2	0.912	shARL13b_2	VC2851	0.501345	AC3
68	Image 17_Airyscan Processing_Maximum intensity projection.czi:0002-0460-0369:c:2/3 - Image 17_Airyscan Processing_Maximum intensity proje	0.349	44924.3	20336	62956	2.243	15691.7	8131299	2	1.214	shARL13b_2	VC2851	0.536216	AC3
71	Image 20_Airyscan Processing_Maximum intensity projection.czi:0001-0631-0442:c:2/3 - Image 20_Airyscan Processing_Maximum intensity proje	0.363	45809.4	19157	62297	2.577	16619.7	8612164	2	1.037	shARL13b_2	VC2851	0.567926	AC3
75	Image 29_Airyscan Processing_Maximum intensity projection.czi:0001-0418-0581:c:2/3 - Image 29_Airyscan Processing_Maximum intensity proje	0.944	37253.4	15441	56356	6.561	35154.9	18216905	2	2.875	shARL13b_2	VC2851	1.20131	AC3
78	Image 18_Airyscan Processing_Maximum intensity projection.czi:0001-0531-0531:c:2/3 - Image 18_Airyscan Processing_Maximum intensity proje	0.616	30892.2	12736	49657	4.509	19017.4	9854625	2	1.824	shARL13b_2	VC2851	0.64986	AC3
81	Image 27_Airyscan Processing_Maximum intensity projection.czi:0001-0533-0609:c:2/3 - Image 27_Airyscan Processing_Maximum intensity proje	0.338	51728.8	23495	65535	2.308	17469.5	9052534	2	0.758	shARL13b_2	VC2851	0.596966	AC3
84	Image 28_Airyscan Processing_Maximum intensity projection.czi:0001-0550-0504:c:2/3 - Image 28_Airyscan Processing_Maximum intensity proje	0.436	47899.4	24934	65535	3.137	20890.5	10825258	2	1.037	shARL13b_2	VC2851	0.713868	AC3
2	Image 29_Airyscan Processing_Maximum intensity projection.czi:0001-0498-0600:c:1/3 - Image 29_Airyscan Processing_Maximum intensity proje	0.477	13889.4	11300	15887	2.936	6620.51	3430683	1	1.202	CTL	VC2852	0.488617	ARL13b
7	Image 30_Airyscan Processing_Maximum intensity projection.czi:0001-0493-0289:c:1/3 - Image 30_Airyscan Processing_Maximum intensity proje	2.055	11375.3	10136	13820	17.407	23378.8	12114648	1	8.163	CTL	VC2852	1.72544	ARL13b
11	Image 41_Airyscan Processing_Maximum intensity projection.czi:0002-0327-0482:c:1/3 - Image 41_Airyscan Processing_Maximum intensity proje	1.833	11528.1	10075	14308	16.797	21134.6	10951724	1	8.24	CTL	VC2852	1.55981	ARL13b
14	Image 28_Airyscan Processing_Maximum intensity projection.czi:0002-0440-0572:c:1/3 - Image 28_Airyscan Processing_Maximum intensity proje	0.938	12948.3	10910	16708	6.919	12144	6292897	1	3.226	CTL	VC2852	0.89627	ARL13b
17	Image 26_Airyscan Processing_Maximum intensity projection.czi:0001-0412-0516:c:1/3 - Image 26_Airyscan Processing_Maximum intensity proje	0.583	12191.9	10498	15041	4.388	7105.43	3681966	1	1.817	CTL	VC2852	0.524406	ARL13b
20	Image 46_Airyscan Processing_Maximum intensity projection.czi:0001-0402-0608:c:1/3 - Image 46_Airyscan Processing_Maximum intensity proje	1	15722.3	10618	21353	8.223	15716.5	8144154	1	3.643	CTL	VC2852	1.15994	ARL13b
25	Image 27_Airyscan Processing_Maximum intensity projection.czi:27:c:1/3 - Image 27_Airyscan Processing_Maximum intensity proje	0.511	13497.3	10802	16686	3.901	6902.44	3576779	1	1.689	CTL	VC2852	0.509425	ARL13b
3	Image 45_Airyscan Processing_Maximum intensity projection.czi:0003-0397-0418:c:1/3 - Image 45_Airyscan Processing_Maximum intensity proje	0.718	12857.2	10811	15514	5.051	9230	4782895	1	2.194	CTL	VC2852	0.681207	ARL13b
26	Image 42_Airyscan Processing_Maximum intensity projection.czi:0001-0412-0512:c:1/3 - Image 42_Airyscan Processing_Maximum intensity proje	1.397	12756.6	10326	18588	10.793	17823.2	9235803	1	5.043	CTL	VC2852	1.31542	ARL13b
29	Image 43_Airyscan Processing_Maximum intensity projection.czi:0001-0557-0466:c:1/3 - Image 43_Airyscan Processing_Maximum intensity proje	1.16	14051.3	11288	21020	9.395	16296.8	8444836	1	4.36	CTL	VC2852	1.20276	ARL13b
32	Image 44_Airyscan Processing_Maximum intensity projection.czi:0001-0691-0514:c:1/3 - Image 44_Airyscan Processing_Maximum intensity proje	0.88	14423	11243	19741	6.682	12692	6576880	1	3.256	CTL	VC2852	0.936717	ARL13b
1	Image 29_Airyscan Processing_Maximum intensity projection.czi:0001-0498-0600:c:2/3 - Image 29_Airyscan Processing_Maximum intensity proje	0.477	45720.5	23683	62649	2.936	21793.1	11292964	2	1.202	CTL	VC2852	0.75004	AC3
8	Image 30_Airyscan Processing_Maximum intensity projection.czi:0001-0493-0289:c:2/3 - Image 30_Airyscan Processing_Maximum intensity proje	2.055	21792.4	10608	42821	17.407	44788.5	23208951	2	8.163	CTL	VC2852	1.54146	AC3
10	Image 41_Airyscan Processing_Maximum intensity projection.czi:0002-0327-0482:c:2/3 - Image 41_Airyscan Processing_Maximum intensity proje	1.833	26208.9	11084	59454	16.797	48048.8	24898409	2	8.24	CTL	VC2852	1.65367	AC3
15	Image 28_Airyscan Processing_Maximum intensity projection.czi:0002-0440-0572:c:2/3 - Image 28_Airyscan Processing_Maximum intensity proje	0.938	40314.9	17599	54825	6.919	37810.5	19593032	2	3.226	CTL	VC2852	1.3013	AC3
18	Image 26_Airyscan Processing_Maximum intensity projection.czi:0001-0412-0516:c:2/3 - Image 26_Airyscan Processing_Maximum intensity proje	0.583	19394.8	12400	33772	4.388	11303.2	5857220	2	1.817	CTL	VC2852	0.389016	AC3
21	Image 46_Airyscan Processing_Maximum intensity projection.czi:0001-0402-0608:c:2/3 - Image 46_Airyscan Processing_Maximum intensity proje	1	23087.5	12468	37796	8.223	23079	11959322	2	3.643	CTL	VC2852	0.794297	AC3
24	Image 27_Airyscan Processing_Maximum intensity projection.czi:27:c:2/3 - Image 27_Airyscan Processing_Maximum intensity proje	0.511	37580.2	14944	58346	3.901	19218.3	9958756	2	1.689	CTL	VC2852	0.661426	AC3
4	Image 45_Airyscan Processing_Maximum intensity projection.czi:0003-0397-0418:c:2/3 - Image 45_Airyscan Processing_Maximum intensity proje	0.718	26867.3	16083	41313	5.051	19287.6	9994648	2	2.194	CTL	VC2852	0.66381	AC3
27	Image 42_Airyscan Processing_Maximum intensity projection.czi:0001-0412-0512:c:2/3 - Image 42_Airyscan Processing_Maximum intensity proje	1.397	23600.3	13449	39084	10.793	32973.7	17086639	2	5.043	CTL	VC2852	1.13484	AC3
30	Image 43_Airyscan Processing_Maximum intensity projection.czi:0001-0557-0466:c:2/3 - Image 43_Airyscan Processing_Maximum intensity proje	1.16	29889.3	15288	59697	9.395	34665.8	17963472	2	4.36	CTL	VC2852	1.19307	AC3
33	Image 44_Airyscan Processing_Maximum intensity projection.czi:0001-0691-0514:c:2/3 - Image 44_Airyscan Processing_Maximum intensity proje	0.88	30280.6	14054	58037	6.682	26646.5	13807974	2	3.256	CTL	VC2852	0.917078	AC3
35	Image 32_Airyscan Processing_Maximum intensity projection.czi:0001-0640-0544:c:1/3 - Image 32_Airyscan Processing_Maximum intensity proje	0.326	19523.4	12348	27488	2.079	6367.25	3299449	1	1.253	shARL13b_1	VC2852	0.469926	ARL13b
39	Image 49_Airyscan Processing_Maximum intensity projection.czi:49:c:1/3 - Image 49_Airyscan Processing_Maximum intensity proje	0.428	12344.6	10815	13722	2.424	5288.6	2740501	1	1.486	shARL13b_1	VC2852	0.390318	ARL13b
41	Image 40_Airyscan Processing_Maximum intensity projection.czi:0001-0355-0685:c:1/3 - Image 40_Airyscan Processing_Maximum intensity proje	0.353	13626.1	11153	16082	2.331	4812.1	2493583	1	1.287	shARL13b_1	VC2852	0.35515	ARL13b
44	Image 50_Airyscan Processing_Maximum intensity projection.czi:c:1/3 - Image 50_Airyscan Processing_Maximum intensity proje	0.255	15978.9	11937	19720	1.865	4070.35	2109215	1	0.512	shARL13b_1	VC2852	0.300406	ARL13b
47	Image 52_Airyscan Processing_Maximum intensity projection.czi:0001-0620-0505:c:1/3 - Image 52_Airyscan Processing_Maximum intensity proje	0.415	12148.4	10632	13579	2.917	5040.45	2611912	1	1.418	shARL13b_1	VC2852	0.372003	ARL13b
50	Image 35_Airyscan Processing_Maximum intensity projection.czi:0001-0496-0439:c:1/3 - Image 35_Airyscan Processing_Maximum intensity proje	0.876	13094.9	10719	16048	6.924	11472.8	5945078	1	3.104	shARL13b_1	VC2852	0.846732	ARL13b
53	Image 54_Airyscan Processing_Maximum intensity projection.czi:0001-0685-0446:c:1/3 - Image 54_Airyscan Processing_Maximum intensity proje	0.299	11960.3	10298	13482	2.193	3577.54	1853845	1	0.778	shARL13b_1	VC2852	0.264035	ARL13b
56	Image 39_Airyscan Processing_Maximum intensity projection.czi:0001-0644-0497:c:1/3 - Image 39_Airyscan Processing_Maximum intensity proje	0.554	12893.6	10713	15876	4.368	7141.11	3700453	1	1.955	shARL13b_1	VC2852	0.52704	ARL13b
59	Image 48_Airyscan Processing_Maximum intensity projection.czi:c:1/3 - Image 48_Airyscan Processing_Maximum intensity proje	0.452	12330.4	11032	14833	3.958	5568.06	2885312	1	1.754	shARL13b_1	VC2852	0.410943	ARL13b
62	Image 34_Airyscan Processing_Maximum intensity projection.czi:0001-0440-0462:c:1/3 - Image 34_Airyscan Processing_Maximum intensity proje	0.865	13810.5	11156	16648	6.461	11939.8	6187096	1	2.888	shARL13b_1	VC2852	0.881201	ARL13b
65	Image 55_Airyscan Processing_Maximum intensity projection.czi:55:c:1/3 - Image 55_Airyscan Processing_Maximum intensity proje	2.115	11134.2	10073	12920	18.411	23549.5	12203110	1	8.605	shARL13b_1	VC2852	1.73804	ARL13b
69	Image 36_Airyscan Processing_Maximum intensity projection.czi:0002-0313-0402:c:1/3 - Image 36_Airyscan Processing_Maximum intensity proje	0.469	12514.8	10050	17404	5.616	5868.68	3041093	1	2.506	shARL13b_1	VC2852	0.43313	ARL13b
71	Image 37_Airyscan Processing_Maximum intensity projection.czi:0001-0465-0570:c:1/3 - Image 37_Airyscan Processing_Maximum intensity proje	0.531	17909.2	11746	23812	5.319	9504.28	4925027	1	2.514	shARL13b_1	VC2852	0.70145	ARL13b
74	Image 53_Airyscan Processing_Maximum intensity projection.czi:0001-0366-0535:c:1/3 - Image 53_Airyscan Processing_Maximum intensity proje	0.27	18625.8	13353	22284	2.063	5032.14	2607605	1	0.685	shARL13b_1	VC2852	0.37139	ARL13b
77	Image 47_Airyscan Processing_Maximum intensity projection.czi:0001-0589-0525:c:1/3 - Image 47_Airyscan Processing_Maximum intensity proje	0.284	12097.9	10524	13629	2.427	3431.93	1778391	1	0.959	shARL13b_1	VC2852	0.253289	ARL13b
36	Image 32_Airyscan Processing_Maximum intensity projection.czi:0001-0640-0544:c:2/3 - Image 32_Airyscan Processing_Maximum intensity proje	0.326	48994.7	18319	65535	2.079	15978.9	8280111	2	1.253	shARL13b_1	VC2852	0.549936	AC3
38	Image 49_Airyscan Processing_Maximum intensity projection.czi:0001-0457-0541:c:2/3 - Image 49_Airyscan Processing_Maximum intensity proje	0.428	43453.4	15753	61554	2.424	18616.1	9646660	2	1.486	shARL13b_1	VC2852	0.640698	AC3
42	Image 40_Airyscan Processing_Maximum intensity projection.czi:0001-0355-0685:c:2/3 - Image 40_Airyscan Processing_Maximum intensity proje	0.353	43882.5	17837	59329	2.331	15497.2	8030500	2	1.287	shARL13b_1	VC2852	0.533358	AC3
45	Image 50_Airyscan Processing_Maximum intensity projection.czi:c:2/3 - Image 50_Airyscan Processing_Maximum intensity proje	0.255	43519.5	16938	59614	1.865	11085.8	5744577	2	0.512	shARL13b_1	VC2852	0.381535	AC3
48	Image 52_Airyscan Processing_Maximum intensity projection.czi:0001-0620-0505:c:2/3 - Image 52_Airyscan Processing_Maximum intensity proje	0.415	20293.2	12071	27673	2.917	8419.74	4363028	2	1.418	shARL13b_1	VC2852	0.289777	AC3
51	Image 35_Airyscan Processing_Maximum intensity projection.czi:0001-0496-0439:c:2/3 - Image 35_Airyscan Processing_Maximum intensity proje	0.876	34697.1	16870	53330	6.924	30399.1	15752496	2	3.104	shARL13b_1	VC2852	1.04623	AC3
54	Image 54_Airyscan Processing_Maximum intensity projection.czi:0001-0685-0446:c:2/3 - Image 54_Airyscan Processing_Maximum intensity proje	0.299	45991.5	22066	61182	2.193	13756.9	7128679	2	0.778	shARL13b_1	VC2852	0.473462	AC3
57	Image 39_Airyscan Processing_Maximum intensity projection.czi:0001-0644-0497:c:2/3 - Image 39_Airyscan Processing_Maximum intensity proje	0.554	34335.9	13419	56589	4.368	19017	9854402	2	1.955	shARL13b_1	VC2852	0.654495	AC3
60	Image 48_Airyscan Processing_Maximum intensity projection.czi:c:2/3 - Image 48_Airyscan Processing_Maximum intensity proje	0.452	17158.3	11467	24056	3.958	7748.2	4015043	2	1.754	shARL13b_1	VC2852	0.266665	AC3
63	Image 34_Airyscan Processing_Maximum intensity projection.czi:0001-0440-0462:c:2/3 - Image 34_Airyscan Processing_Maximum intensity proje	0.865	37613.6	16350	56474	6.461	32518.7	16850891	2	2.888	shARL13b_1	VC2852	1.11918	AC3
66	Image 55_Airyscan Processing_Maximum intensity projection.czi:55:c:2/3 - Image 55_Airyscan Processing_Maximum intensity proje	2.115	13189.4	10259	18179	18.411	27896.2	14455542	2	8.605	shARL13b_1	VC2852	0.960087	AC3
68	Image 36_Airyscan Processing_Maximum intensity projection.czi:0002-0313-0402:c:2/3 - Image 36_Airyscan Processing_Maximum intensity proje	0.469	18121.3	10694	34317	5.616	8497.81	4403480	2	2.506	shARL13b_1	VC2852	0.292464	AC3
72	Image 37_Airyscan Processing_Maximum intensity projection.czi:0001-0465-0570:c:2/3 - Image 37_Airyscan Processing_Maximum intensity proje	0.531	47675.7	28498	64508	5.319	25301.2	13110812	2	2.514	shARL13b_1	VC2852	0.870775	AC3
75	Image 53_Airyscan Processing_Maximum intensity projection.czi:0001-0366-0535:c:2/3 - Image 53_Airyscan Processing_Maximum intensity proje	0.27	34646.4	16924	54591	2.063	9360.45	4850495	2	0.685	shARL13b_1	VC2852	0.322153	AC3
78	Image 47_Airyscan Processing_Maximum intensity projection.czi:0001-0589-0525:c:2/3 - Image 47_Airyscan Processing_Maximum intensity proje	0.284	23603.9	14436	32562	2.427	6695.94	3469770	2	0.959	shARL13b_1	VC2852	0.23045	AC3
80	Image 25_Airyscan Processing_Maximum intensity projection.czi:0001-0476-0420:c:1/3 - Image 25_Airyscan Processing_Maximum intensity proje	0.334	12259.4	10677	14491	2.37	4092.86	2120879	1	0.74	shARL13b_2	VC2852	0.302068	ARL13b
83	Image 56_Airyscan Processing_Maximum intensity projection.czi:0001-0383-0483:c:1/3 - Image 56_Airyscan Processing_Maximum intensity proje	0.338	12273.8	10265	14376	2.712	4145.04	2147919	1	0.973	shARL13b_2	VC2852	0.305919	ARL13b
86	Image 57_Airyscan Processing_Maximum intensity projection.czi:c:1/3 - Image 57_Airyscan Processing_Maximum intensity proje	0.272	12777.3	10966	15939	2.503	3476.72	1801601	1	1.105	shARL13b_2	VC2852	0.256594	ARL13b
90	Image 61_Airyscan Processing_Maximum intensity projection.czi:0002-0384-0761:c:1/3 - Image 61_Airyscan Processing_Maximum intensity proje	0.652	10999.8	10176	12550	6.066	7174.85	3717937	1	2.595	shARL13b_2	VC2852	0.52953	ARL13b
93	Image 65_Airyscan Processing_Maximum intensity projection.czi:0002-0482-0402:c:1/3 - Image 65_Airyscan Processing_Maximum intensity proje	0.683	11521.3	10495	13605	4.836	7870.77	4078554	1	1.827	shARL13b_2	VC2852	0.580891	ARL13b
96	Image 24_Airyscan Processing_Maximum intensity projection.czi:0001-0473-0335:c:1/3 - Image 24_Airyscan Processing_Maximum intensity proje	0.351	12351.8	10776	13867	2.644	4338.23	2248028	1	1.053	shARL13b_2	VC2852	0.320177	ARL13b
99	Image 62_Airyscan Processing_Maximum intensity projection.czi:0001-0279-0436:c:1/3 - Image 62_Airyscan Processing_Maximum intensity proje	0.347	13485.6	10827	15958	2.265	4684.38	2427402	1	1.621	shARL13b_2	VC2852	0.345724	ARL13b
104	Image 63_Airyscan Processing_Maximum intensity projection.czi:0002-0376-0661:c:1/3 - Image 63_Airyscan Processing_Maximum intensity proje	0.197	11006.5	10144	12058	2.003	2166.51	1122664	1	0.634	shARL13b_2	VC2852	0.159896	ARL13b
106	Image 60_Airyscan Processing_Maximum intensity projection.czi:0001-0487-0502:c:1/3 - Image 60_Airyscan Processing_Maximum intensity proje	0.984	12548.5	11103	15123	9.962	12350.1	6399724	1	4.595	shARL13b_2	VC2852	0.911485	ARL13b
109	Image 59_Airyscan Processing_Maximum intensity projection.czi:c:1/3 - Image 59_Airyscan Processing_Maximum intensity proje	0.16	21766.9	14769	29547	1.484	3486.46	1806649	1	0.501	shARL13b_2	VC2852	0.257313	ARL13b
112	Image 64_Airyscan Processing_Maximum intensity projection.czi:c:1/3 - Image 64_Airyscan Processing_Maximum intensity proje	0.394	13083	10747	15586	3.028	5150.49	2668935	1	1.212	shARL13b_2	VC2852	0.380125	ARL13b
81	Image 25_Airyscan Processing_Maximum intensity projection.czi:0001-0476-0420:c:2/3 - Image 25_Airyscan Processing_Maximum intensity proje	0.334	29803.1	14708	53779	2.37	9949.9	5155943	2	0.74	shARL13b_2	VC2852	0.34244	AC3
84	Image 56_Airyscan Processing_Maximum intensity projection.czi:0001-0383-0483:c:2/3 - Image 56_Airyscan Processing_Maximum intensity proje	0.338	17079.9	11122	23057	2.712	5768.11	2988981	2	0.973	shARL13b_2	VC2852	0.198518	AC3
87	Image 57_Airyscan Processing_Maximum intensity projection.czi:c:2/3 - Image 57_Airyscan Processing_Maximum intensity proje	0.272	21592.7	12542	34730	2.503	5875.4	3044576	2	1.105	shARL13b_2	VC2852	0.20221	AC3
89	Image 61_Airyscan Processing_Maximum intensity projection.czi:0002-0384-0761:c:2/3 - Image 61_Airyscan Processing_Maximum intensity proje	0.652	17268.4	12242	32340	6.066	11263.7	5836732	2	2.595	shARL13b_2	VC2852	0.387656	AC3
94	Image 65_Airyscan Processing_Maximum intensity projection.czi:0002-0482-0402:c:2/3 - Image 65_Airyscan Processing_Maximum intensity proje	0.683	37944.9	18070	61836	4.836	25921.9	13432492	2	1.827	shARL13b_2	VC2852	0.89214	AC3
97	Image 24_Airyscan Processing_Maximum intensity projection.czi:0001-0473-0335:c:2/3 - Image 24_Airyscan Processing_Maximum intensity proje	0.351	47402.1	20828	64561	2.644	16648.7	8627186	2	1.053	shARL13b_2	VC2852	0.572988	AC3
100	Image 62_Airyscan Processing_Maximum intensity projection.czi:0001-0279-0436:c:2/3 - Image 62_Airyscan Processing_Maximum intensity proje	0.347	55156.7	29309	65535	2.265	19159.4	9928208	2	1.621	shARL13b_2	VC2852	0.659397	AC3
103	Image 63_Airyscan Processing_Maximum intensity projection.czi:0002-0376-0661:c:2/3 - Image 63_Airyscan Processing_Maximum intensity proje	0.197	16107	12307	20464	2.003	3170.48	1642913	2	0.634	shARL13b_2	VC2852	0.109117	AC3
107	Image 60_Airyscan Processing_Maximum intensity projection.czi:0001-0487-0502:c:2/3 - Image 60_Airyscan Processing_Maximum intensity proje	0.984	32816	18732	58873	9.962	32297.4	16736182	2	4.595	shARL13b_2	VC2852	1.11156	AC3
110	Image 59_Airyscan Processing_Maximum intensity projection.czi:c:2/3 - Image 59_Airyscan Processing_Maximum intensity proje	0.16	31079.1	15610	48597	1.484	4978.03	2579566	2	0.501	shARL13b_2	VC2852	0.171326	AC3
113	Image 64_Airyscan Processing_Maximum intensity projection.czi:c:2/3 - Image 64_Airyscan Processing_Maximum intensity proje	0.394	46675.7	18885	63450	3.028	18375.2	9521833	2	1.212	shARL13b_2	VC2852	0.632407	AC3

## Sheet: Figure_1H_I
Treatment	Cell	Dendritic Nodes	Total dendritic length	Dissociation
CTL	Image 6.czi	23	1569.64	VC2604
CTL	Image 8.ome.czi	21	1760.35	VC2604
CTL	Image 10.czi	8	1035.67	VC2604
CTL	Image 24.ome.czi	22	1920.69	VC2604
CTL	Image 27.ome.czi	16	1128.23	VC2604
CTL	Image 29.ome.czi	18	1465.67	VC2604
CTL	Image 31.ome.czi	12	1327.07	VC2604
CTL	Image 33	23	1731.19	VC2604
CTL	Image 45.czi	31	2435.06	VC2604
shARL13b_1	Image 16.czi	32	2306.37	VC2604
shARL13b_1	Image 18.ome.czi	21	1556.55	VC2604
shARL13b_1	Image 20.czi	9	867.315	VC2604
shARL13b_1	Image 22.czi	28	1938.1	VC2604
shARL13b_1	Image 38.czi	16	1579	VC2604
shARL13b_1	Image 41.czi	20	1681.4	VC2604
shARL13b_1	Image 53.czi	21	1378.19	VC2604
shARL13b_1	Image 55.czi	13	1357.54	VC2604
CTL	Image 8_Maximum intensity projection	22	1981.37	VC2605
CTL	Image 12_Maximum intensity projection.ome	28	2021.33	VC2605
CTL	Image 14_Maximum intensity projection.ome	22	2319.1	VC2605
CTL	Image 16_Maximum intensity projection.ome	23	1613.57	VC2605
CTL	Image 20_Maximum intensity projection	15	1264.37	VC2605
CTL	Image 22_Maximum intensity projection.ome	17	1590.63	VC2605
CTL	Image 32_Maximum intensity projection	24	2214.36	VC2605
CTL	Image 34_Maximum intensity projection	7	1109.47	VC2605
CTL	Image 36_Maximum intensity projection	27	2473.6	VC2605
CTL	Image41_Maximum intensity projection	24	1858.59	VC2605
shARL13b_1	Image 2_Maximum intensity projection	9	1889.62	VC2605
shARL13b_1	Image 4_Maximum intensity projection	14	3334.81	VC2605
shARL13b_1	Image6_Maximum intensity projection	17	3287.56	VC2605
shARL13b_1	Image 18_Maximum intensity projection	22	1667.32	VC2605
shARL13b_1	Image24_Maximum intensity projection	14	1380.03	VC2605
shARL13b_1	Image26_Maximum intensity projection	21	2100.72	VC2605
shARL13b_1	Image28_Maximum intensity projection	23	1507.03	VC2605
shARL13b_1	Image30_Maximum intensity projection	25	1809.41	VC2605
CTL	Image 3_Maximum intensity projection.czi	14	1030.32	VC2614
CTL	Image 6_Maximum intensity projection.czi	15	924.613	VC2614
CTL	Image 9_Maximum intensity projection.czi	22	1332.52	VC2614
CTL	Image 11_Maximum intensity projection.ome.czi	23	1955.4	VC2614
CTL	Image 13_Maximum intensity projection.czi	29	2425.32	VC2614
CTL	Image 25_Maximum intensity projection.czi	11	957.781	VC2614
CTL	Image 29_Maximum intensity projection.czi	24	1755.41	VC2614
CTL	Image 31_Maximum intensity projection.czi	15	1572.51	VC2614
CTL	Image 33_Maximum intensity projection.czi	17	1903.3	VC2614
CTL	Image 39_Maximum intensity projection.czi	29	2690.4	VC2614
CTL	Image 7_Maximum intensity projection	18	1702.97	VC2614
CTL	Image 10_Maximum intensity projection	37	2549.8	VC2614
CTL	Image 12_Maximum intensity projection	19	2086.59	VC2614
shARL13b_1	Image 3_Maximum intensity projection	20	1674.71	VC2614
shARL13b_1	Image 15_Maximum intensity projection	16	1559.31	VC2614
shARL13b_1	Image 17_Maximum intensity projection	9	823.324	VC2614
shARL13b_1	Image 19_Maximum intensity projection	22	1847.45	VC2614
shARL13b_1	Image 35_Maximum intensity projection	17	1501.64	VC2614
shARL13b_1	Image 37_Maximum intensity projection	22	2467.49	VC2614
shARL13b_1	Image 41_Maximum intensity projection	23	1585.92	VC2614
shARL13b_1	Image 5_Maximum intensity projection	34	2117.77	VC2614
shARL13b_1	Image 21_Maximum intensity projection	19	958.966	VC2614
shARL13b_1	Image 23_Maximum intensity projection	16	1477.14	VC2614
shARL13b_1	Image 43_Maximum intensity projection	21	1559.48	VC2614
shARL13b_1	Image 45_Maximum intensity projection	13	1101.12	VC2614
