# Supplementary material for: Ciliary neuropeptidergic signaling dynamically regulates excitatory synapses in postnatal neocortical pyramidal neurons
Source: eLife. 2021 Mar 2;10:e65427. doi: 10.7554/eLife.65427 (PMC7952091; doi:10.7554/eLife.65427)
Supplement: Figure 2—figure supplement 1—source data 1. [file elife-65427-fig2-figsupp1-data1.xlsx]

## Sheet: SuppFig2A_24h
Image.Name	Hour	Minute	Sec	Summary.Statistic	Area	Average.intensity	Total.intensity	Image	Overlay	Treatment	NormAvgAVG	NormAvgTOT	Dissociation	Time
Red	1 day, 13:00:00	1 day, 6:00:00	137	Average	0.074052	31721.2	141978	Copy of Image 11_Maximum intensity projection.tif	GRB_R	CTL	1.22469	1.14331	VC2604	24h
Red	1 day, 17:00:00	1 day, 15:00:00	142	Average	0.10164	25944.1	150917	Copy of Image 23_Maximum intensity projection.tif	GRB_R	CTL	1.00165	1.2153	VC2604	24h
Red	1 day, 22:00:00	2 days, 1:00:00	360	Average	0.0951618	24271.9	135986	Copy of Image 32_Maximum intensity projection.tif	GRB_R	CTL	0.937087	1.09506	VC2604	24h
Red	2 days, 1:00:00	2 days, 5:00:00	145	Average	0.082368	21309.5	102249	Copy of Image 42_Maximum intensity projection.tif	GRB_R	CTL	0.822714	0.823384	VC2604	24h
Red	2 days, 4:00:00	1 day, 4:00:00	458	Average	0.069696	22677.1	90708.5	Copy of Image 44_Maximum intensity projection.tif	GRB_R	CTL	0.875515	0.730454	VC2604	24h
Red	2 days, 9:00:00	12:00:00	536	Average	0.092928	23196	129393	Copy of Image 46_Maximum intensity projection.tif	GRB_R	CTL	0.895546	1.04197	VC2604	24h
Red	2 days, 11:00:00	1 day, 15:00:00	877	Average	0.075504	30592.2	135348	Copy of Image 5_Maximum intensity projection.tif	GRB_R	CTL	1.1811	1.08993	VC2604	24h
Red	03:00:00	01:00:00	454	Average	0.068244	27499.8	106869	Copy of Image 7_Maximum intensity projection.tif	GRB_R	CTL	1.06171	0.860591	VC2604	24h
Blue	1 day, 13:00:00	1 day, 6:00:00	177	Average	0.074052	18135	84574.6	Copy of Image 11_Maximum intensity projection.tif	GRB_B	CTL	1.03201	0.984089	VC2604	24h
Blue	1 day, 17:00:00	1 day, 15:00:00	217	Average	0.10164	25074.5	153203	Copy of Image 23_Maximum intensity projection.tif	GRB_B	CTL	1.42691	1.78263	VC2604	24h
Blue	1 day, 22:00:00	2 days, 1:00:00	410	Average	0.0951618	14960.4	87347.1	Copy of Image 32_Maximum intensity projection.tif	GRB_B	CTL	0.851349	1.01635	VC2604	24h
Blue	2 days, 1:00:00	2 days, 5:00:00	199	Average	0.082368	17790.8	83027.6	Copy of Image 42_Maximum intensity projection.tif	GRB_B	CTL	1.01242	0.966089	VC2604	24h
Blue	2 days, 4:00:00	1 day, 4:00:00	484	Average	0.069696	18558.1	74232.4	Copy of Image 44_Maximum intensity projection.tif	GRB_B	CTL	1.05609	0.86375	VC2604	24h
Blue	2 days, 9:00:00	12:00:00	576	Average	0.092928	14268	76746.2	Copy of Image 46_Maximum intensity projection.tif	GRB_B	CTL	0.811951	0.893	VC2604	24h
Blue	2 days, 11:00:00	1 day, 15:00:00	929	Average	0.075504	15015.9	63279	Copy of Image 5_Maximum intensity projection.tif	GRB_B	CTL	0.854509	0.736299	VC2604	24h
Blue	03:00:00	01:00:00	494	Average	0.068244	16777.5	65126.1	Copy of Image 7_Maximum intensity projection.tif	GRB_B	CTL	0.954757	0.757791	VC2604	24h
Red	2 days, 5:00:00	20:00:00	93	Average	0.0890037	28922.1	150085	Copy of Image 15_Maximum intensity projection.tif	GRB_R	shARL13b_1	1.11662	1.2086	VC2604	24h
Red	2 days, 11:00:00	1 day, 18:00:00	84	Average	0.0931514	29766.2	159580	Copy of Image 17_Maximum intensity projection.tif	GRB_R	shARL13b_1	1.14921	1.28506	VC2604	24h
Red	03:00:00	2 days, 5:00:00	588	Average	0.0887535	32036.5	174163	Copy of Image 19_Maximum intensity projection.tif	GRB_R	shARL13b_1	1.23686	1.40249	VC2604	24h
Red	06:00:00	1 day, 13:00:00	364	Average	0.110552	26986.3	172157	Copy of Image 21_Maximum intensity projection.tif	GRB_R	shARL13b_1	1.04188	1.38634	VC2604	24h
Red	12:00:00	1 day, 3:00:00	832	Average	0.100188	26147.2	148879	Copy of Image 37_Maximum intensity projection.tif	GRB_R	shARL13b_1	1.00949	1.19889	VC2604	24h
Red	13:00:00	2 days, 2:00:00	477	Average	0.0830991	24217.9	119107	Copy of Image 40_Maximum intensity projection.tif	GRB_R	shARL13b_1	0.935	0.959144	VC2604	24h
Red	15:00:00	1 day, 7:00:00	983	Average	0.108671	27045.8	175881	Copy of Image 48_Maximum intensity projection.tif	GRB_R	shARL13b_1	1.04418	1.41633	VC2604	24h
Red	1 day, 8:00:00	2 days, 8:00:00	723	Average	0.0940896	24260.2	132681	Copy of Image 50_Maximum intensity projection.tif	GRB_R	shARL13b_1	0.936633	1.06845	VC2604	24h
Red	1 day, 10:00:00	2 days, 9:00:00	10	Average	0.088572	29616.2	154452	Copy of Image 54_Maximum intensity projection.tif	GRB_R	shARL13b_1	1.14342	1.24377	VC2604	24h
Blue	2 days, 5:00:00	20:00:00	133	Average	0.0890037	21585.8	111561	Copy of Image 15_Maximum intensity projection.tif	GRB_B	shARL13b_1	1.22838	1.2981	VC2604	24h
Blue	2 days, 11:00:00	1 day, 18:00:00	153	Average	0.0931514	17575.9	100768	Copy of Image 17_Maximum intensity projection.tif	GRB_B	shARL13b_1	1.00019	1.17251	VC2604	24h
Blue	03:00:00	2 days, 5:00:00	635	Average	0.0887535	22301.8	118535	Copy of Image 19_Maximum intensity projection.tif	GRB_B	shARL13b_1	1.26913	1.37924	VC2604	24h
Blue	06:00:00	1 day, 13:00:00	419	Average	0.110552	20308.2	131783	Copy of Image 21_Maximum intensity projection.tif	GRB_B	shARL13b_1	1.15568	1.53339	VC2604	24h
Blue	12:00:00	1 day, 3:00:00	887	Average	0.100188	17631.1	109862	Copy of Image 37_Maximum intensity projection.tif	GRB_B	shARL13b_1	1.00333	1.27832	VC2604	24h
Blue	13:00:00	2 days, 2:00:00	538	Average	0.0830991	20604.8	106350	Copy of Image 40_Maximum intensity projection.tif	GRB_B	shARL13b_1	1.17256	1.23746	VC2604	24h
Blue	15:00:00	1 day, 8:00:00	35	Average	0.108671	18866.4	125403	Copy of Image 48_Maximum intensity projection.tif	GRB_B	shARL13b_1	1.07363	1.45916	VC2604	24h
Blue	1 day, 8:00:00	2 days, 8:00:00	802	Average	0.0940896	22394.3	120612	Copy of Image 50_Maximum intensity projection.tif	GRB_B	shARL13b_1	1.27439	1.40341	VC2604	24h
Blue	1 day, 10:00:00	2 days, 9:00:00	73	Average	0.088572	20604.5	106898	Copy of Image 54_Maximum intensity projection.tif	GRB_B	shARL13b_1	1.17254	1.24383	VC2604	24h
Red	04:05:00	06:05:00	10	Average	0.106165	23904.8	153216	Copy of Image 13_Maximum intensity projection.tif	GRB_R	CTL	1.02736	1.1002	VC2605	24h
Red	01:04:00	03:02:00	8	Average	0.0960028	22679.2	126803	Copy of Image 19_Maximum intensity projection.tif	GRB_R	CTL	0.974693	0.910539	VC2605	24h
Red	04:03:00	03:03:00	68	Average	0.092928	21038.2	119603	Copy of Image 21_Maximum intensity projection.tif	GRB_R	CTL	0.90417	0.858835	VC2605	24h
Red	05:05:00	07:06:00	19	Average	0.109626	24140.1	159159	Copy of Image 31_Maximum intensity projection.tif	GRB_R	CTL	1.03748	1.14288	VC2605	24h
Red	07:04:00	07:00:00	98	Average	0.097768	24220.1	136424	Copy of Image 33_Maximum intensity projection.tif	GRB_R	CTL	1.04092	0.979624	VC2605	24h
Red	00:03:00	03:06:00	57	Average	0.100876	23625.7	140365	Copy of Image 40_Maximum intensity projection.tif	GRB_R	CTL	1.01537	1.00792	VC2605	24h
Blue	04:05:00	06:05:00	67	Average	0.106165	25459.1	155755	Copy of Image 13_Maximum intensity projection.tif	GRB_B	CTL	1.38998	1.39152	VC2605	24h
Blue	01:04:00	03:02:00	63	Average	0.0960028	15893.9	89041.7	Copy of Image 19_Maximum intensity projection.tif	GRB_B	CTL	0.867753	0.795501	VC2605	24h
Blue	04:03:00	03:04:00	21	Average	0.092928	18518.7	123253	Copy of Image 21_Maximum intensity projection.tif	GRB_B	CTL	1.01106	1.10115	VC2605	24h
Blue	05:05:00	07:06:00	59	Average	0.109626	16044.3	107078	Copy of Image 31_Maximum intensity projection.tif	GRB_B	CTL	0.875962	0.956635	VC2605	24h
Blue	07:04:00	07:01:00	58	Average	0.097768	19026.4	109664	Copy of Image 33_Maximum intensity projection.tif	GRB_B	CTL	1.03877	0.979744	VC2605	24h
Blue	00:03:00	03:07:00	47	Average	0.100876	14954.7	86797.3	Copy of Image 40_Maximum intensity projection.tif	GRB_B	CTL	0.816473	0.77545	VC2605	24h
Red	09:02:00	00:03:00	86	Average	0.103554	23785.1	148726	Copy of Image 17_Maximum intensity projection.tif	GRB_R	shARL13b_1	1.02222	1.06796	VC2605	24h
Red	04:00:00	05:08:00	81	Average	0.0993813	25449.5	151298	Copy of Image 23_Maximum intensity projection.tif	GRB_R	shARL13b_1	1.09375	1.08643	VC2605	24h
Red	07:04:00	06:00:00	25	Average	0.107158	27216.6	167666	Copy of Image 27_Maximum intensity projection.tif	GRB_R	shARL13b_1	1.1697	1.20396	VC2605	24h
Red	00:01:00	00:07:00	84	Average	0.0840452	23044.7	111303	Copy of Image 29_Maximum intensity projection.tif	GRB_R	shARL13b_1	0.990402	0.799233	VC2605	24h
Red	01:02:00	01:06:00	38	Average	0.0996653	29545.8	175692	Copy of Image 37.ome_Maximum intensity projection.tif	GRB_R	shARL13b_1	1.2698	1.26159	VC2605	24h
Blue	09:02:00	00:04:00	60	Average	0.103554	19576.7	120236	Copy of Image 17_Maximum intensity projection.tif	GRB_B	shARL13b_1	1.06882	1.07419	VC2605	24h
Blue	04:00:00	05:09:00	29	Average	0.0993813	17262.5	98901.8	Copy of Image 23_Maximum intensity projection.tif	GRB_B	shARL13b_1	0.942471	0.883591	VC2605	24h
Blue	07:04:00	06:00:00	79	Average	0.107158	21139.8	132429	Copy of Image 27_Maximum intensity projection.tif	GRB_B	shARL13b_1	1.15416	1.18313	VC2605	24h
Blue	00:01:00	00:08:00	47	Average	0.0840452	28180.4	140686	Copy of Image 29_Maximum intensity projection.tif	GRB_B	shARL13b_1	1.53855	1.25689	VC2605	24h
Blue	01:02:00	01:06:00	88	Average	0.0996653	17843.2	107025	Copy of Image 37.ome_Maximum intensity projection.tif	GRB_B	shARL13b_1	0.974179	0.956167	VC2605	24h
Red	08:05:00	03:07:00	20	Average	0.11212	24534.8	159360	Copy of Image 12_Maximum intensity projection.tif	GRB_R	CTL	1.12481	1.26342	VC2614	24h
Red	03:01:00	03:09:00	83	Average	0.103519	24312.6	153696	Copy of Image 24_Maximum intensity projection.tif	GRB_R	CTL	1.11463	1.21851	VC2614	24h
Red	05:01:00	07:05:00	18	Average	0.104339	23810.1	144402	Copy of Image 28_Maximum intensity projection.tif	GRB_R	CTL	1.09159	1.14483	VC2614	24h
Red	03:03:00	00:00:00	41	Average	0.0919394	20564.2	110793	Copy of Image 30_Maximum intensity projection.tif	GRB_R	CTL	0.942776	0.878375	VC2614	24h
Red	06:05:00	02:04:00	26	Average	0.100188	19899.9	118709	Copy of Image 32_Maximum intensity projection.tif	GRB_R	CTL	0.912322	0.941132	VC2614	24h
Red	08:05:00	05:07:00	45	Average	0.078408	18416.5	84579.5	Copy of Image 4_Maximum intensity projection.tif	GRB_R	CTL	0.844316	0.670552	VC2614	24h
Red	03:03:00	02:02:00	37	Average	0.078408	19968.2	92975	Copy of Image 11_Maximum intensity projection.tif	GRB_R	CTL	0.915454	0.737112	VC2614	24h
Red	06:03:00	09:04:00	99	Average	0.109989	22992.5	144559	Copy of Image 9_Maximum intensity projection.tif	GRB_R	CTL	1.05411	1.14607	VC2614	24h
Blue	08:05:00	03:07:00	70	Average	0.11212	18269.5	126733	Copy of Image 12_Maximum intensity projection.tif	GRB_B	CTL	0.962078	1.1516	VC2614	24h
Blue	03:01:00	04:00:00	43	Average	0.103519	13497.5	85535.6	Copy of Image 24_Maximum intensity projection.tif	GRB_B	CTL	0.710783	0.777243	VC2614	24h
Blue	05:01:00	07:05:00	88	Average	0.104339	20968	128750	Copy of Image 28_Maximum intensity projection.tif	GRB_B	CTL	1.10418	1.16992	VC2614	24h
Blue	03:03:00	00:00:00	92	Average	0.0919394	19267.5	106408	Copy of Image 30_Maximum intensity projection.tif	GRB_B	CTL	1.01463	0.966902	VC2614	24h
Blue	06:05:00	02:04:00	66	Average	0.100188	22424	122095	Copy of Image 32_Maximum intensity projection.tif	GRB_B	CTL	1.18085	1.10945	VC2614	24h
Blue	08:05:00	05:07:00	85	Average	0.078408	19088.1	86654	Copy of Image 4_Maximum intensity projection.tif	GRB_B	CTL	1.00518	0.787405	VC2614	24h
Blue	03:03:00	02:02:00	90	Average	0.078408	16489.1	76977.4	Copy of Image 11_Maximum intensity projection.tif	GRB_B	CTL	0.86832	0.699476	VC2614	24h
Blue	06:03:00	09:05:00	49	Average	0.109989	21913.6	147248	Copy of Image 9_Maximum intensity projection.tif	GRB_B	CTL	1.15397	1.33801	VC2614	24h
Red	00:00:00	07:06:00	84	Average	0.0972076	25531	150919	Copy of Image 14_Maximum intensity projection.tif	GRB_R	shARL13b_1	1.17048	1.1965	VC2614	24h
Red	04:01:00	07:06:00	34	Average	0.110352	24441.5	153060	Copy of Image 16_Maximum intensity projection.tif	GRB_R	shARL13b_1	1.12054	1.21347	VC2614	24h
Red	04:02:00	05:09:00	96	Average	0.114418	27250.1	174787	Copy of Image 40_Maximum intensity projection.tif	GRB_R	shARL13b_1	1.2493	1.38573	VC2614	24h
Red	02:00:00	04:08:00	88	Average	0.104544	28496.8	173436	Copy of Image 22_Maximum intensity projection.tif	GRB_R	shARL13b_1	1.30645	1.37501	VC2614	24h
Red	04:05:00	07:09:00	37	Average	0.104544	26340.8	154619	Copy of Image 42_Maximum intensity projection.tif	GRB_R	shARL13b_1	1.20761	1.22583	VC2614	24h
Red	06:05:00	08:05:00	9	Average	0.1089	29734.5	190349	Copy of Image 44_Maximum intensity projection.tif	GRB_R	shARL13b_1	1.3632	1.5091	VC2614	24h
Red	09:01:00	01:05:00	78	Average	0.128369	28891	236828	Copy of Image 4_sh_Maximum intensity projection.ome.tif	GRB_R	shARL13b_1	1.32452	1.87759	VC2614	24h
Blue	00:00:00	07:07:00	74	Average	0.0972076	14868	85022.2	Copy of Image 14_Maximum intensity projection.tif	GRB_B	shARL13b_1	0.782953	0.772577	VC2614	24h
Blue	04:01:00	07:07:00	8	Average	0.110352	23091.7	154479	Copy of Image 16_Maximum intensity projection.tif	GRB_B	shARL13b_1	1.21601	1.40372	VC2614	24h
Blue	04:02:00	06:00:00	26	Average	0.114418	13817.8	92013.3	Copy of Image 40_Maximum intensity projection.tif	GRB_B	shARL13b_1	0.727648	0.836104	VC2614	24h
Blue	02:00:00	04:09:00	18	Average	0.104544	14334.1	90680.3	Copy of Image 22_Maximum intensity projection.tif	GRB_B	shARL13b_1	0.754836	0.823991	VC2614	24h
Blue	04:05:00	07:09:00	77	Average	0.104544	13209.5	81581.3	Copy of Image 42_Maximum intensity projection.tif	GRB_B	shARL13b_1	0.695618	0.741311	VC2614	24h
Blue	06:05:00	08:05:00	69	Average	0.1089	14214.2	91341.6	Copy of Image 44_Maximum intensity projection.tif	GRB_B	shARL13b_1	0.748521	0.83	VC2614	24h
Blue	09:01:00	01:06:00	28	Average	0.128369	18852	173608	Copy of Image 4_sh_Maximum intensity projection.ome.tif	GRB_B	shARL13b_1	0.99275	1.57754	VC2614	24h
Red	00:02:00	03:06:00	27	Average	0.111804	19623.2	126181	Copy of Image 12_Maximum intensity projection.tif	GRB_R	CTL	0.865252	0.834396	VC2666	24h
Red	08:00:00	03:00:00	11	Average	0.105844	25086.4	158957	Copy of Image 16_Maximum intensity projection.tif	GRB_R	CTL	1.10615	1.05113	VC2666	24h
Red	00:04:00	09:08:00	62	Average	0.118096	23327.8	168535	Copy of Image 6_Maximum intensity projection.tif	GRB_R	CTL	1.0286	1.11447	VC2666	24h
Blue	00:02:00	03:07:00	77	Average	0.111804	14147.2	104197	Copy of Image 12_Maximum intensity projection.tif	GRB_B	CTL	0.888938	0.952043	VC2666	24h
Blue	08:00:00	03:01:00	61	Average	0.105844	16304.1	102367	Copy of Image 16_Maximum intensity projection.tif	GRB_B	CTL	1.02446	0.935324	VC2666	24h
Blue	00:05:00	00:00:00	12	Average	0.118096	17293	121773	Copy of Image 6_Maximum intensity projection.tif	GRB_B	CTL	1.0866	1.11263	VC2666	24h
Red	06:02:00	05:06:00	11	Average	0.099792	19868.6	115705	Copy of Image 10_Maximum intensity projection.tif	GRB_R	shARL13b_1	0.876076	0.765121	VC2666	24h
Red	05:01:00	04:00:00	92	Average	0.16335	26851.6	279979	Copy of Image 14_Maximum intensity projection.tif	GRB_R	shARL13b_1	1.18398	1.85142	VC2666	24h
Red	04:01:00	03:02:00	50	Average	0.128357	21725.1	185698	Copy of Image 8_Maximum intensity projection.tif	GRB_R	shARL13b_1	0.957933	1.22796	VC2666	24h
Blue	06:02:00	05:07:00	21	Average	0.099792	15966.5	95646.5	Copy of Image 10_Maximum intensity projection.tif	GRB_B	shARL13b_1	1.00325	0.873915	VC2666	24h
Blue	05:01:00	04:02:00	29	Average	0.16335	17155.9	179619	Copy of Image 14_Maximum intensity projection.tif	GRB_B	shARL13b_1	1.07799	1.64116	VC2666	24h
Blue	04:01:00	03:04:00	30	Average	0.128357	24005.5	191623	Copy of Image 8_Maximum intensity projection.tif	GRB_B	shARL13b_1	1.50838	1.75084	VC2666	24h

## Sheet: SuppFig2A_48h
Image.Name	Hour	Minute	Sec	Summary.Statistic	Area	Average.intensity	Total.intensity	Image	Overlay	Treatment	NormAvgAVG	NormAvgTOT	Dissociation	SLIDE	Time
Red	1 day, 16:00:00	1 day, 21:00:00	455	Average	0.0823824	10101	123745	10.tif	GRB_R	CTL	1.06198	1.23522	VC2866	s5	48h
Red	1 day, 18:00:00	1 day, 14:00:00	520	Average	0.0645187	9319.64	83989.3	7.tif	GRB_R	CTL	0.979833	0.838375	VC2866	s3	48h
Red	1 day, 20:00:00	1 day, 23:00:00	860	Average	0.0641155	8132.94	72341.5	8.tif	GRB_R	CTL	0.855069	0.722107	VC2866	s3	48h
Red	2 days, 5:00:00	1 day, 0:00:00	56	Average	0.0822614	10492.2	120648	9.tif	GRB_R	CTL	1.10312	1.2043	VC2866	s4	48h
Blue	1 day, 16:00:00	1 day, 21:00:00	585	Average	0.0823824	12642.4	147912	10.tif	GRB_B	CTL	0.974567	1.06634	VC2866	s5	48h
Blue	1 day, 18:00:00	1 day, 14:00:00	930	Average	0.0645187	10381.2	96107.8	7.tif	GRB_B	CTL	0.80026	0.69287	VC2866	s3	48h
Blue	1 day, 20:00:00	2 days, 0:00:00	261	Average	0.0641155	16050.2	155548	8.tif	GRB_B	CTL	1.23727	1.1214	VC2866	s3	48h
Blue	2 days, 5:00:00	1 day, 0:00:00	403	Average	0.0822614	12815.4	155271	9.tif	GRB_B	CTL	0.987906	1.1194	VC2866	s4	48h
Red	2 days, 8:00:00	1 day, 15:00:00	721	Average	0.0812936	9641.71	115873	11.tif	GRB_R	shIFT88_CEP164	1.01369	1.15664	VC2866	s6	48h
Red	2 days, 9:00:00	1 day, 5:00:00	214	Average	0.0967781	10947.4	154132	12.tif	GRB_R	shIFT88_CEP164	1.15097	1.53854	VC2866	s6	48h
Red	2 days, 10:00:00	2 days, 4:00:00	544	Average	0.0836728	10079.5	126209	13.tif	GRB_R	shIFT88_CEP164	1.05973	1.25981	VC2866	s7	48h
Red	01:00:00	1 day, 13:00:00	383	Average	0.0758336	9661.51	103602	15.tif	GRB_R	shIFT88_CEP164	1.01578	1.03415	VC2866	s8	48h
Red	03:00:00	1 day, 14:00:00	868	Average	0.110431	12011.1	189048	16.tif	GRB_R	shIFT88_CEP164	1.2628	1.88706	VC2866	s8	48h
Blue	2 days, 8:00:00	1 day, 15:00:00	901	Average	0.0812936	11723	135275	11.tif	GRB_B	shIFT88_CEP164	0.903698	0.975235	VC2866	s6	48h
Blue	2 days, 9:00:00	1 day, 5:00:00	334	Average	0.0967781	11047.8	156458	12.tif	GRB_B	shIFT88_CEP164	0.851643	1.12795	VC2866	s6	48h
Blue	2 days, 10:00:00	2 days, 4:00:00	744	Average	0.0836728	9314.19	113576	13.tif	GRB_B	shIFT88_CEP164	0.718007	0.818805	VC2866	s7	48h
Blue	01:00:00	1 day, 13:00:00	713	Average	0.0758336	11518.6	123104	15.tif	GRB_B	shIFT88_CEP164	0.887935	0.887491	VC2866	s8	48h
Blue	03:00:00	1 day, 15:00:00	258	Average	0.110431	13598.4	213125	16.tif	GRB_B	shIFT88_CEP164	1.04827	1.53648	VC2866	s8	48h
Red	04:00:00	2 days, 6:00:00	234	Average	0.117343	13090	229990	17.tif	GRB_R	shARL13b_2	1.37623	2.29575	VC2866	s9	48h
Red	07:00:00	05:00:00	231	Average	0.0811617	10239	115632	19.tif	GRB_R	shARL13b_2	1.07649	1.15423	VC2866	s10	48h
Red	08:00:00	1 day, 17:00:00	162	Average	0.0832292	9242.93	110563	2.tif	GRB_R	shARL13b_2	0.971768	1.10363	VC2866	s1	48h
Red	09:00:00	1 day, 5:00:00	569	Average	0.101617	10830.3	161132	4.tif	GRB_R	shARL13b_2	1.13866	1.60841	VC2866	s2	48h
Red	10:00:00	21:00:00	385	Average	0.0759336	10323.4	116513	5.tif	GRB_R	shARL13b_2	1.08536	1.16303	VC2866	s2	48h
Blue	04:00:00	2 days, 6:00:00	584	Average	0.117343	12686	224015	17.tif	GRB_B	shARL13b_2	0.977928	1.61499	VC2866	s9	48h
Blue	07:00:00	05:00:00	552	Average	0.0811617	11522.1	125303	19.tif	GRB_B	shARL13b_2	0.888206	0.903346	VC2866	s10	48h
Blue	08:00:00	1 day, 17:00:00	502	Average	0.0832292	9316.03	110954	2.tif	GRB_B	shARL13b_2	0.718149	0.799899	VC2866	s1	48h
Blue	09:00:00	1 day, 5:00:00	869	Average	0.101617	11959	180128	4.tif	GRB_B	shARL13b_2	0.921888	1.29859	VC2866	s2	48h
Blue	10:00:00	21:00:00	755	Average	0.0759336	10017.7	124850	5.tif	GRB_B	shARL13b_2	0.772237	0.900084	VC2866	s2	48h
Red	1 day, 12:00:00	06:00:00	220	Average	0.0893815	9270.47	121202	14.tif	GRB_R	CTL	1.19304	1.37185	VC2868	s10_68	48h
Red	1 day, 12:00:00	1 day, 18:00:00	108	Average	0.070769	7769.21	91003.3	15.tif	GRB_R	CTL	0.999838	1.03004	VC2868	s11_68	48h
Red	1 day, 12:00:00	2 days, 9:00:00	558	Average	0.080415	8778.76	100745	16.tif	GRB_R	CTL	1.12976	1.1403	VC2868	s11_68	48h
Red	1 day, 13:00:00	1 day, 9:00:00	777	Average	0.08137	8335.58	100258	17.tif	GRB_R	CTL	1.07273	1.13479	VC2868	s11_68	48h
Red	1 day, 13:00:00	2 days, 6:00:00	468	Average	0.0601407	7617.41	70279.3	7.tif	GRB_R	CTL	0.980303	0.795472	VC2868	s8_68	48h
Red	1 day, 14:00:00	16:00:00	450	Average	0.0508085	6279.2	46965.4	8.tif	GRB_R	CTL	0.808085	0.531589	VC2868	s8_68	48h
Red	1 day, 14:00:00	1 day, 14:00:00	827	Average	0.0983178	6342.65	87992.5	9.tif	GRB_R	CTL	0.816251	0.995962	VC2868	s9_68	48h
Blue	1 day, 12:00:00	06:00:00	350	Average	0.0893815	12330.2	155821	14.tif	GRB_B	CTL	0.96596	1.0464	VC2868	s10_68	48h
Blue	1 day, 12:00:00	1 day, 18:00:00	238	Average	0.070769	12070.1	126483	15.tif	GRB_B	CTL	0.945581	0.84939	VC2868	s10_68	48h
Blue	1 day, 12:00:00	2 days, 9:00:00	705	Average	0.080415	14998	170280	16.tif	GRB_B	CTL	1.17496	1.14351	VC2868	s11_68	48h
Blue	1 day, 13:00:00	1 day, 9:00:00	938	Average	0.08137	11616.5	138519	17.tif	GRB_B	CTL	0.910046	0.930212	VC2868	s11_68	48h
Blue	1 day, 13:00:00	2 days, 6:00:00	598	Average	0.0601407	14841.7	140989	7.tif	GRB_B	CTL	1.16271	0.946801	VC2868	s8_68	48h
Blue	1 day, 14:00:00	16:00:00	580	Average	0.0508085	9136.88	76268.7	8.tif	GRB_B	CTL	0.715792	0.512177	VC2868	s8_68	48h
Blue	1 day, 14:00:00	1 day, 15:00:00	588	Average	0.0983178	14359.6	234015	9.tif	GRB_B	CTL	1.12494	1.57151	VC2868	s9_68	48h
Red	1 day, 15:00:00	09:00:00	970	Average	0.0759336	9140.47	98319.8	18.tif	GRB_R	shIFT88_CEP164	1.17631	1.11285	VC2868	s3_68	48h
Red	1 day, 15:00:00	1 day, 9:00:00	777	Average	0.0886125	8138.32	103181	19.tif	GRB_R	shIFT88_CEP164	1.04734	1.16787	VC2868	s3_68	48h
Red	1 day, 15:00:00	2 days, 8:00:00	737	Average	0.101617	8810.74	133950	20.tif	GRB_R	shIFT88_CEP164	1.13387	1.51614	VC2868	s3_68	48h
Red	1 day, 16:00:00	1 day, 9:00:00	508	Average	0.0800922	7289.63	86521.3	22.tif	GRB_R	shIFT88_CEP164	0.93812	0.979311	VC2868	s4_68	48h
Red	1 day, 16:00:00	2 days, 3:00:00	986	Average	0.0728524	7592.92	79459.7	24.tif	GRB_R	shIFT88_CEP164	0.97715	0.899382	VC2868	s4_68	48h
Red	1 day, 17:00:00	11:00:00	552	Average	0.061696	7087.53	58876	2.tif	GRB_R	shIFT88_CEP164	0.912111	0.666401	VC2868	s1_68	48h
Red	1 day, 17:00:00	1 day, 3:00:00	25	Average	0.066315	6996.95	64382.3	3.tif	GRB_R	shIFT88_CEP164	0.900454	0.728725	VC2868	s1_68	48h
Red	1 day, 17:00:00	2 days, 2:00:00	271	Average	0.0618689	7515.9	66602.8	4.tif	GRB_R	shIFT88_CEP164	0.967239	0.753859	VC2868	s2_68	48h
Red	1 day, 18:00:00	09:00:00	238	Average	0.102447	8735.09	130347	5.tif	GRB_R	shIFT88_CEP164	1.12414	1.47536	VC2868	s2_68	48h
Blue	1 day, 15:00:00	10:00:00	198	Average	0.0759336	18066.6	205139	18.tif	GRB_B	shIFT88_CEP164	1.41536	1.3776	VC2868	s3_68	48h
Blue	1 day, 15:00:00	1 day, 10:00:00	25	Average	0.0886125	12662.8	176011	19.tif	GRB_B	shIFT88_CEP164	0.99202	1.18199	VC2868	s3_68	48h
Blue	1 day, 15:00:00	2 days, 9:00:00	7	Average	0.101617	16849.4	261283	20.tif	GRB_B	shIFT88_CEP164	1.32	1.75463	VC2868	s3_68	48h
Blue	1 day, 16:00:00	1 day, 9:00:00	848	Average	0.0800922	9811.75	126461	22.tif	GRB_B	shIFT88_CEP164	0.768663	0.849237	VC2868	s4_68	48h
Blue	1 day, 16:00:00	2 days, 4:00:00	258	Average	0.0728524	13390.8	149863	24.tif	GRB_B	shIFT88_CEP164	1.04905	1.00639	VC2868	s4_68	48h
Blue	1 day, 17:00:00	11:00:00	747	Average	0.061696	14911.9	132829	2.tif	GRB_B	shIFT88_CEP164	1.16821	0.892003	VC2868	s1_68	48h
Blue	1 day, 17:00:00	1 day, 3:00:00	328	Average	0.066315	16823.8	157639	3.tif	GRB_B	shIFT88_CEP164	1.318	1.05861	VC2868	s1_68	48h
Blue	1 day, 17:00:00	2 days, 2:00:00	562	Average	0.0618689	9944.27	97246.3	4.tif	GRB_B	shIFT88_CEP164	0.779045	0.653051	VC2868	s2_68	48h
Blue	1 day, 18:00:00	09:00:00	488	Average	0.102447	11072.3	165167	5.tif	GRB_B	shIFT88_CEP164	0.867412	1.10917	VC2868	s2_68	48h
Red	1 day, 18:00:00	2 days, 3:00:00	138	Average	0.0842906	9053.96	115072	10.tif	GRB_R	shARL13b_2	1.16518	1.30247	VC2868	s5_68	48h
Red	1 day, 19:00:00	08:00:00	778	Average	0.0739445	7960.18	83558.5	11.tif	GRB_R	shARL13b_2	1.02442	0.945775	VC2868	s5_68	48h
Red	1 day, 19:00:00	1 day, 8:00:00	369	Average	0.086531	7307.34	90412.5	12.tif	GRB_R	shARL13b_2	0.940399	1.02335	VC2868	s6_68	48h
Red	1 day, 20:00:00	09:00:00	408	Average	0.0783903	7420.38	81940.6	13.tif	GRB_R	shARL13b_2	0.954946	0.927463	VC2868	s6_68	48h
Red	1 day, 20:00:00	1 day, 3:00:00	128	Average	0.0667769	9672.86	93256.8	25.tif	GRB_R	shARL13b_2	1.24482	1.05555	VC2868	s7_68	48h
Blue	1 day, 18:00:00	2 days, 3:00:00	474	Average	0.0842906	15460.2	199391	10.tif	GRB_B	shARL13b_2	1.21117	1.33899	VC2868	s5_68	48h
Blue	1 day, 19:00:00	09:00:00	66	Average	0.0739445	12296.8	134335	11.tif	GRB_B	shARL13b_2	0.963341	0.902118	VC2868	s5_68	48h
Blue	1 day, 19:00:00	1 day, 8:00:00	610	Average	0.086531	12801.6	167130	12.tif	GRB_B	shARL13b_2	1.00289	1.12235	VC2868	s6_68	48h
Blue	1 day, 20:00:00	09:00:00	687	Average	0.0783903	13083.7	150406	13.tif	GRB_B	shARL13b_2	1.02499	1.01004	VC2868	s6_68	48h
Blue	1 day, 20:00:00	1 day, 3:00:00	388	Average	0.0667769	13766.9	131190	25.tif	GRB_B	shARL13b_2	1.07852	0.881	VC2868	s7_68	48h
Red	2 days, 6:00:00	1 day, 11:00:00	877	Average	0.0725836	17382.4	182481	24.tif	GRB_R	CTL	0.984207	1.07557	VC2869	s3_69	48h
Red	2 days, 8:00:00	1 day, 6:00:00	620	Average	0.0663264	17048.4	163620	25.tif	GRB_R	CTL	0.965297	0.964403	VC2869	s3_69	48h
Red	2 days, 11:00:00	2 days, 6:00:00	514	Average	0.0637123	19188.6	170548	2.tif	GRB_R	CTL	1.08647	1.00524	VC2869	s1_69	48h
Red	04:00:00	2 days, 2:00:00	988	Average	0.0567472	17604	131140	4.tif	GRB_R	CTL	0.996757	0.77296	VC2869	s1_69	48h
Red	06:00:00	23:00:00	864	Average	0.0542799	15882.1	117911	5.tif	GRB_R	CTL	0.899261	0.694987	VC2869	s1_69	48h
Red	08:00:00	2 days, 7:00:00	698	Average	0.0717771	17054.9	174289	7.tif	GRB_R	CTL	0.965666	1.02729	VC2869	s2_69	48h
Red	10:00:00	1 day, 10:00:00	275	Average	0.0965362	20441.5	285367	8.tif	GRB_R	CTL	1.15741	1.682	VC2869	s2_69	48h
Red	13:00:00	09:00:00	94	Average	0.0592766	16688.6	131920	9.tif	GRB_R	CTL	0.944923	0.777556	VC2869	s2_69	48h
Blue	2 days, 6:00:00	1 day, 12:00:00	7	Average	0.0725836	15476.9	166472	24.tif	GRB_B	CTL	1.16941	1.26943	VC2869	s3_69	48h
Blue	2 days, 8:00:00	1 day, 6:00:00	800	Average	0.0663264	10273	104017	25.tif	GRB_B	CTL	0.776213	0.793182	VC2869	s3_69	48h
Blue	2 days, 11:00:00	2 days, 6:00:00	834	Average	0.0637123	10778.4	99540	2.tif	GRB_B	CTL	0.814402	0.759039	VC2869	s1_69	48h
Blue	04:00:00	2 days, 3:00:00	118	Average	0.0567472	14822.1	112041	4.tif	GRB_B	CTL	1.11994	0.854365	VC2869	s1_69	48h
Blue	06:00:00	1 day, 0:00:00	234	Average	0.0542799	19352.3	157751	5.tif	GRB_B	CTL	1.46223	1.20293	VC2869	s1_69	48h
Blue	08:00:00	2 days, 8:00:00	118	Average	0.0717771	10271.1	115636	7.tif	GRB_B	CTL	0.77607	0.88178	VC2869	s2_69	48h
Blue	10:00:00	1 day, 10:00:00	655	Average	0.0965362	14490.5	202058	8.tif	GRB_B	CTL	1.09488	1.54079	VC2869	s2_69	48h
Blue	13:00:00	09:00:00	394	Average	0.0592766	10413.7	91599.4	9.tif	GRB_B	CTL	0.786846	0.698488	VC2869	s2_69	48h
Red	17:00:00	2 days, 10:00:00	435	Average	0.0805018	19545.6	247661	12.tif	GRB_R	shIFT88_CEP164	1.10669	1.45975	VC2869	s4_69	48h
Red	20:00:00	1 day, 1:00:00	65	Average	0.0878701	19367.5	243717	13.tif	GRB_R	shIFT88_CEP164	1.0966	1.43651	VC2869	s4_69	48h
Red	1 day, 1:00:00	20:00:00	537	Average	0.083373	19297.3	242874	16.tif	GRB_R	shIFT88_CEP164	1.09263	1.43154	VC2869	s4_69	48h
Red	1 day, 3:00:00	17:00:00	591	Average	0.0683495	17226	166404	17.tif	GRB_R	shIFT88_CEP164	0.975352	0.980809	VC2869	s4_69	48h
Red	1 day, 4:00:00	2 days, 11:00:00	271	Average	0.0596798	18292.1	158705	18.tif	GRB_R	shIFT88_CEP164	1.03572	0.935435	VC2869	s5_69	48h
Red	1 day, 6:00:00	1 day, 14:00:00	126	Average	0.0962521	20952	323121	19.tif	GRB_R	shIFT88_CEP164	1.18632	1.90453	VC2869	s5_69	48h
Red	1 day, 13:00:00	06:00:00	393	Average	0.089892	15439	201448	22.tif	GRB_R	shIFT88_CEP164	0.874168	1.18737	VC2869	s5_69	48h
Red	1 day, 15:00:00	1 day, 16:00:00	310	Average	0.0666061	14817.7	136703	23.tif	GRB_R	shIFT88_CEP164	0.838991	0.805752	VC2869	s5_69	48h
Red	1 day, 17:00:00	15:00:00	304	Average	0.0940431	18225.1	259958	27.tif	GRB_R	shIFT88_CEP164	1.03192	1.53224	VC2869	s6_69	48h
Red	1 day, 22:00:00	15:00:00	319	Average	0.101099	16281.2	244421	20_again.tif	GRB_R	shIFT88_CEP164	0.921857	1.44065	VC2869	s5_69	48h
Blue	17:00:00	2 days, 10:00:00	835	Average	0.0805018	16834.2	211152	12.tif	GRB_B	shIFT88_CEP164	1.27197	1.61013	VC2869	s4_69	48h
Blue	20:00:00	1 day, 1:00:00	195	Average	0.0878701	15477.3	196371	13.tif	GRB_B	shIFT88_CEP164	1.16944	1.49742	VC2869	s4_69	48h
Blue	1 day, 1:00:00	20:00:00	902	Average	0.083373	14519.6	182103	16.tif	GRB_B	shIFT88_CEP164	1.09708	1.38862	VC2869	s4_69	48h
Blue	1 day, 3:00:00	17:00:00	882	Average	0.0683495	25244.4	239432	17.tif	GRB_B	shIFT88_CEP164	1.90743	1.82578	VC2869	s4_69	48h
Blue	1 day, 4:00:00	2 days, 11:00:00	631	Average	0.0596798	16090	145438	18.tif	GRB_B	shIFT88_CEP164	1.21574	1.10903	VC2869	s5_69	48h
Blue	1 day, 6:00:00	1 day, 14:00:00	396	Average	0.0962521	14629	221561	19.tif	GRB_B	shIFT88_CEP164	1.10535	1.68951	VC2869	s5_69	48h
Blue	1 day, 13:00:00	06:00:00	764	Average	0.089892	12160.7	151593	22.tif	GRB_B	shIFT88_CEP164	0.918843	1.15597	VC2869	s5_69	48h
Blue	1 day, 15:00:00	1 day, 16:00:00	720	Average	0.0666061	12111.1	109887	23.tif	GRB_B	shIFT88_CEP164	0.915097	0.837942	VC2869	s5_69	48h
Blue	1 day, 17:00:00	15:00:00	654	Average	0.0940431	18404.2	276249	27.tif	GRB_B	shIFT88_CEP164	1.3906	2.10653	VC2869	s6_69	48h
Blue	1 day, 22:00:00	15:00:00	559	Average	0.101099	11739.9	176928	20_again.tif	GRB_B	shIFT88_CEP164	0.887049	1.34916	VC2869	s5_69	48h
Red	04:00:00	19:00:00	381	Average	0.0874823	14300.1	180001	12.tif	GRB_R	CTL	1.10182	1.29253	VC2870	s2_70	48h
Red	06:00:00	2 days, 3:00:00	341	Average	0.0714669	14606.5	147459	14.tif	GRB_R	CTL	1.12543	1.05885	VC2870	s2_70	48h
Red	09:00:00	06:00:00	899	Average	0.0750786	11252	116887	15.tif	GRB_R	CTL	0.86696	0.839329	VC2870	s2_70	48h
Red	11:00:00	2 days, 5:00:00	71	Average	0.0772802	11469.5	122886	1.tif	GRB_R	CTL	0.883722	0.882408	VC2870	s1_70	48h
Red	15:00:00	2 days, 5:00:00	394	Average	0.0626369	13180.9	117409	21.tif	GRB_R	CTL	1.01558	0.843073	VC2870	s3_70	48h
Red	1 day, 2:00:00	16:00:00	163	Average	0.0842776	14357.3	170581	3.tif	GRB_R	CTL	1.10623	1.22489	VC2870	s1_70	48h
Red	1 day, 6:00:00	19:00:00	750	Average	0.0755723	11684.2	119616	4.tif	GRB_R	CTL	0.900263	0.858925	VC2870	s1_70	48h
Blue	04:00:00	19:00:00	712	Average	0.0874823	20416.8	259522	12.tif	GRB_B	CTL	1.23463	1.39052	VC2870	s2_70	48h
Blue	06:00:00	2 days, 3:00:00	651	Average	0.0714669	20083.6	208010	14.tif	GRB_B	CTL	1.21448	1.11452	VC2870	s2_70	48h
Blue	09:00:00	07:00:00	199	Average	0.0750786	13005.5	143348	15.tif	GRB_B	CTL	0.786461	0.768063	VC2870	s2_70	48h
Blue	11:00:00	2 days, 5:00:00	321	Average	0.0772802	17183.7	192198	1.tif	GRB_B	CTL	1.03912	1.0298	VC2870	s1_70	48h
Blue	15:00:00	2 days, 5:00:00	704	Average	0.0626369	13521.8	130470	21.tif	GRB_B	CTL	0.817681	0.699062	VC2870	s3_70	48h
Blue	1 day, 2:00:00	16:00:00	443	Average	0.0842776	14874.7	188911	3.tif	GRB_B	CTL	0.899495	1.01219	VC2870	s1_70	48h
Blue	1 day, 6:00:00	20:00:00	20	Average	0.0755723	16671.3	183995	4.tif	GRB_B	CTL	1.00813	0.985847	VC2870	s1_70	48h
Red	1 day, 9:00:00	09:00:00	469	Average	0.092907	17656.6	222412	10.tif	GRB_R	shIFT88_CEP164	1.36043	1.59707	VC2870	s4_70	48h
Red	1 day, 12:00:00	09:00:00	769	Average	0.083192	13152.8	153703	17.tif	GRB_R	shIFT88_CEP164	1.01342	1.10369	VC2870	s5_70	48h
Red	1 day, 13:00:00	2 days, 11:00:00	384	Average	0.0725836	13268.3	137080	18.tif	GRB_R	shIFT88_CEP164	1.02232	0.984324	VC2870	s6_70	48h
Red	1 day, 17:00:00	1 day, 16:00:00	643	Average	0.0862938	13676.5	174302	20.tif	GRB_R	shIFT88_CEP164	1.05377	1.25161	VC2870	s6_70	48h
Red	1 day, 20:00:00	1 day, 0:00:00	823	Average	0.0758095	12042.2	124728	28.tif	GRB_R	shIFT88_CEP164	0.927846	0.895634	VC2870	s7_70	48h
Red	1 day, 22:00:00	00:00:00	759	Average	0.089026	14074.2	181693	29.tif	GRB_R	shIFT88_CEP164	1.08441	1.30468	VC2870	s7_70	48h
Red	2 days, 2:00:00	06:00:00	493	Average	0.0809042	14761.8	178709	31.tif	GRB_R	shIFT88_CEP164	1.13739	1.28325	VC2870	s7_70	48h
Red	2 days, 7:00:00	23:00:00	786	Average	0.0866164	13058.7	157135	8.tif	GRB_R	shIFT88_CEP164	1.00617	1.12833	VC2870	s4_70	48h
Blue	1 day, 9:00:00	09:00:00	769	Average	0.092907	12692.6	172484	10.tif	GRB_B	shIFT88_CEP164	0.767537	0.924171	VC2870	s4_70	48h
Blue	1 day, 12:00:00	10:00:00	169	Average	0.083192	13859.2	158643	17.tif	GRB_B	shIFT88_CEP164	0.838085	0.85001	VC2870	s5_70	48h
Blue	1 day, 13:00:00	2 days, 11:00:00	674	Average	0.0725836	14200.4	138478	18.tif	GRB_B	shIFT88_CEP164	0.858718	0.741966	VC2870	s6_70	48h
Blue	1 day, 17:00:00	1 day, 17:00:00	23	Average	0.0862938	12007.5	151611	20.tif	GRB_B	shIFT88_CEP164	0.726111	0.812334	VC2870	s6_70	48h
Blue	1 day, 20:00:00	1 day, 1:00:00	103	Average	0.0758095	17940.4	225373	28.tif	GRB_B	shIFT88_CEP164	1.08488	1.20755	VC2870	s7_70	48h
Blue	1 day, 22:00:00	01:00:00	119	Average	0.089026	13872.9	182737	29.tif	GRB_B	shIFT88_CEP164	0.838913	0.979108	VC2870	s7_70	48h
Blue	2 days, 2:00:00	06:00:00	753	Average	0.0809042	15546.9	183479	31.tif	GRB_B	shIFT88_CEP164	0.940141	0.983084	VC2870	s7_70	48h
Blue	2 days, 7:00:00	1 day, 0:00:00	76	Average	0.0866164	16140.8	204621	8.tif	GRB_B	shIFT88_CEP164	0.976055	1.09636	VC2870	s4_70	48h
Red	08:00:00	2 days, 5:00:00	66	Average	0.0974694	14585.5	209841	24.tif	GRB_R	shARL13b_2	1.12381	1.5068	VC2870	s9_70	48h
Red	11:00:00	21:00:00	479	Average	0.0852392	14117.6	175236	25.tif	GRB_R	shARL13b_2	1.08776	1.25832	VC2870	s9_70	48h
Red	13:00:00	1 day, 8:00:00	900	Average	0.08842	15725.2	220495	26.tif	GRB_R	shARL13b_2	1.21162	1.5833	VC2870	s9_70	48h
Red	16:00:00	11:00:00	73	Average	0.0853646	14139.4	173452	33.tif	GRB_R	shARL13b_2	1.08944	1.2455	VC2870	s10_70	48h
Red	19:00:00	22:00:00	28	Average	0.0807492	13998.4	160003	34.tif	GRB_R	shARL13b_2	1.07857	1.14893	VC2870	s10_70	48h
Red	1 day, 2:00:00	1 day, 0:00:00	332	Average	0.102827	11372.5	173353	7.tif	GRB_R	shARL13b_2	0.87625	1.24479	VC2870	s8_70	48h
Blue	08:00:00	2 days, 5:00:00	436	Average	0.0974694	13485.8	196397	24.tif	GRB_B	shARL13b_2	0.815506	1.0523	VC2870	s9_70	48h
Blue	11:00:00	21:00:00	910	Average	0.0852392	11163.2	130878	25.tif	GRB_B	shARL13b_2	0.675051	0.701246	VC2870	s9_70	48h
Blue	13:00:00	1 day, 9:00:00	200	Average	0.08842	15589	216253	26.tif	GRB_B	shARL13b_2	0.942687	1.15869	VC2870	s9_70	48h
Blue	16:00:00	11:00:00	423	Average	0.0853646	10648	134653	33.tif	GRB_B	shARL13b_2	0.643901	0.721472	VC2870	s10_70	48h
Blue	19:00:00	22:00:00	419	Average	0.0807492	18807.2	229938	34.tif	GRB_B	shARL13b_2	1.13729	1.23201	VC2870	s10_70	48h
Blue	1 day, 2:00:00	1 day, 0:00:00	735	Average	0.102827	18443.8	266114	7.tif	GRB_B	shARL13b_2	1.11532	1.42584	VC2870	s8_70	48h
Red	04:00:00	1 day, 16:00:00	10	Average	0.0849833	10670.5	126057	Copy of Image 40_Maximum intensity projection.tif	GRB_R	CTL	0.949511	1.03494	VC2872	s_1	48h
Red	07:00:00	1 day, 12:00:00	413	Average	0.091165	12698.9	172808	Copy of Image 41_Maximum intensity projection.tif	GRB_R	CTL	1.13	1.41877	VC2872	s_1	48h
Red	10:00:00	06:00:00	853	Average	0.0854253	11657.9	148952	Copy of Image 42_Maximum intensity projection.tif	GRB_R	CTL	1.03738	1.22291	VC2872	s_1	48h
Red	12:00:00	1 day, 13:00:00	520	Average	0.0588733	9087.9	74080.1	Copy of Image 43_Maximum intensity projection.tif	GRB_R	CTL	0.808683	0.608204	VC2872	s_1	48h
Red	14:00:00	19:00:00	950	Average	0.0549561	11324.4	85610.6	Copy of Image 44_Maximum intensity projection.tif	GRB_R	CTL	1.0077	0.702871	VC2872	s_1	48h
Red	17:00:00	06:00:00	513	Average	0.0659301	11987.8	123300	Copy of Image 45_Maximum intensity projection.tif	GRB_R	CTL	1.06673	1.01231	VC2872	s_1	48h
Blue	04:00:00	1 day, 16:00:00	402	Average	0.0849833	14231.7	173922	Copy of Image 40_Maximum intensity projection.tif	GRB_B	CTL	0.998895	1.0525	VC2872	s_1	48h
Blue	07:00:00	1 day, 12:00:00	707	Average	0.091165	15719.1	219988	Copy of Image 41_Maximum intensity projection.tif	GRB_B	CTL	1.1033	1.33127	VC2872	s_1	48h
Blue	10:00:00	07:00:00	236	Average	0.0854253	15626.9	203861	Copy of Image 42_Maximum intensity projection.tif	GRB_B	CTL	1.09683	1.23368	VC2872	s_1	48h
Blue	12:00:00	1 day, 13:00:00	884	Average	0.0588733	12155.7	109080	Copy of Image 43_Maximum intensity projection.tif	GRB_B	CTL	0.853188	0.660106	VC2872	s_1	48h
Blue	14:00:00	20:00:00	280	Average	0.0549561	10326.7	78121.3	Copy of Image 44_Maximum intensity projection.tif	GRB_B	CTL	0.724815	0.472756	VC2872	s_1	48h
Blue	17:00:00	06:00:00	863	Average	0.0659301	17424.3	206506	Copy of Image 45_Maximum intensity projection.tif	GRB_B	CTL	1.22298	1.24969	VC2872	s_1	48h
Red	1 day, 7:00:00	15:00:00	434	Average	0.0671984	13703.5	126005	Copy of Image 25_Maximum intensity projection.tif	GRB_R	shIFT88_CEP164	1.2194	1.03451	VC2872	s_2	48h
Red	1 day, 10:00:00	2 days, 10:00:00	921	Average	0.0967781	14642.8	198094	Copy of Image 26_Maximum intensity projection.tif	GRB_R	shIFT88_CEP164	1.30299	1.62637	VC2872	s_2	48h
Red	1 day, 12:00:00	2 days, 9:00:00	206	Average	0.0887133	13171.8	157848	Copy of Image 27_Maximum intensity projection.tif	GRB_R	shIFT88_CEP164	1.17208	1.29595	VC2872	s_2	48h
Red	1 day, 14:00:00	2 days, 8:00:00	725	Average	0.0985549	14624.7	219147	Copy of Image 28_Maximum intensity projection.tif	GRB_R	shIFT88_CEP164	1.30137	1.79922	VC2872	s_2	48h
Red	1 day, 21:00:00	06:00:00	896	Average	0.0689544	12025.3	118497	Copy of Image 29_Maximum intensity projection.tif	GRB_R	shIFT88_CEP164	1.07007	0.972873	VC2872	s_2	48h
Red	2 days, 2:00:00	01:00:00	135	Average	0.0950845	16195.7	220917	Copy of Image 31_Maximum intensity projection.tif	GRB_R	shIFT88_CEP164	1.44117	1.81375	VC2872	s_2	48h
Red	2 days, 5:00:00	16:00:00	596	Average	0.0826336	11699.7	134278	Copy of Image 35_Maximum intensity projection.tif	GRB_R	shIFT88_CEP164	1.04109	1.10243	VC2872	s_3	48h
Blue	1 day, 7:00:00	15:00:00	796	Average	0.0671984	13385.4	131735	Copy of Image 25_Maximum intensity projection.tif	GRB_B	shIFT88_CEP164	0.939499	0.797205	VC2872	s_2	48h
Blue	1 day, 10:00:00	2 days, 11:00:00	295	Average	0.0967781	14232.4	199289	Copy of Image 26_Maximum intensity projection.tif	GRB_B	shIFT88_CEP164	0.998943	1.20601	VC2872	s_2	48h
Blue	1 day, 12:00:00	2 days, 9:00:00	593	Average	0.0887133	21807.5	275689	Copy of Image 27_Maximum intensity projection.tif	GRB_B	shIFT88_CEP164	1.53063	1.66835	VC2872	s_2	48h
Blue	1 day, 14:00:00	2 days, 9:00:00	85	Average	0.0985549	12708.5	203408	Copy of Image 28_Maximum intensity projection.tif	GRB_B	shIFT88_CEP164	0.89199	1.23093	VC2872	s_2	48h
Blue	1 day, 21:00:00	07:00:00	233	Average	0.0689544	18631.6	204988	Copy of Image 29_Maximum intensity projection.tif	GRB_B	shIFT88_CEP164	1.30772	1.2405	VC2872	s_2	48h
Blue	2 days, 2:00:00	01:00:00	548	Average	0.0950845	13167	195448	Copy of Image 31_Maximum intensity projection.tif	GRB_B	shIFT88_CEP164	0.924168	1.18276	VC2872	s_2	48h
Blue	2 days, 5:00:00	16:00:00	984	Average	0.0826336	14790.4	174248	Copy of Image 35_Maximum intensity projection.tif	GRB_B	shIFT88_CEP164	1.03811	1.05448	VC2872	s_3	48h
Red	05:00:00	2 days, 6:00:00	20	Average	0.0872581	13710.2	177363	Copy of Image 37_Maximum intensity projection.tif	GRB_R	shARL13b_2	1.22	1.45616	VC2872	s_4	48h
Red	08:00:00	11:00:00	574	Average	0.0908395	13553.3	180848	Copy of Image 38_Maximum intensity projection.tif	GRB_R	shARL13b_2	1.20604	1.48478	VC2872	s_4	48h
Red	09:00:00	2 days, 1:00:00	720	Average	0.0807492	13039.9	149961	Copy of Image 39_Maximum intensity projection.tif	GRB_R	shARL13b_2	1.16035	1.23119	VC2872	s_4	48h
Blue	05:00:00	2 days, 6:00:00	376	Average	0.0872581	29974.7	390956	Copy of Image 37_Maximum intensity projection.tif	GRB_B	shARL13b_2	2.10387	2.36589	VC2872	s_4	48h
Blue	08:00:00	11:00:00	924	Average	0.0908395	16981.9	223885	Copy of Image 38_Maximum intensity projection.tif	GRB_B	shARL13b_2	1.19193	1.35485	VC2872	s_4	48h
Blue	09:00:00	2 days, 2:00:00	84	Average	0.0807492	12805.1	154544	Copy of Image 39_Maximum intensity projection.tif	GRB_B	shARL13b_2	0.898763	0.935234	VC2872	s_4	48h

## Sheet: SuppFig2B_24h
Image.Name	Minute	Summary.Statistic	Area	Average.intensity	Total.intensity	Image	Overlay	Treatment	NormAvgAVG	NormAvgTOT	Dissociation	SLIDE
Maximum-2	19	Average	0.0519329	18222.1	180579	Copy of c6 D.tif	GRB_R	CTL	0.846006	0.703071	VC2589	VC2589_S2
Maximum-3	5	Average	0.064954	12131.4	152791	Copy of c8 D.tif	GRB_B	CTL	0.682451	0.777372	VC2589	VC2589_S3
Maximum-3	11	Average	0.0544904	16828.3	167598	Copy of c5 D.tif	GRB_B	CTL	0.946672	0.852705	VC2589	VC2589_S2
Maximum-3	59	Average	0.0641212	15106.4	174338	Copy of c7 D.tif	GRB_B	CTL	0.849811	0.886998	VC2589	VC2589_S3
Maximum-2	59	Average	0.0641212	19865.1	242282	Copy of c7 D.tif	GRB_R	CTL	0.922291	0.943307	VC2589	VC2589_S3
Maximum-2	11	Average	0.0544904	23421.3	247599	Copy of c5 D.tif	GRB_R	CTL	1.08739	0.964007	VC2589	VC2589_S2
Maximum-2	5	Average	0.064954	22292.4	278428	Copy of c8 D.tif	GRB_R	CTL	1.03498	1.08404	VC2589	VC2589_S3
Maximum-3	46	Average	0.0724486	18348.6	230078	Copy of c2 D.tif	GRB_B	CTL	1.0322	1.17059	VC2589	VC2589_S1
Maximum-2	46	Average	0.0724486	23893.7	335329	Copy of c2 D.tif	GRB_R	CTL	1.10933	1.30558	VC2589	VC2589_S1
Maximum-3	19	Average	0.0519329	26466.5	257937	Copy of c6 D.tif	GRB_B	CTL	1.48887	1.31233	VC2589	VC2589_S2
Maximum-2	31	Average	0.0435476	15175	119650	sh c6 D.tif	GRB_R	shARL13b_1	0.704538	0.465848	VC2589	VC2589_S5
Maximum-3	15	Average	0.0454678	12840	95145.5	s2 c6 D.tif	GRB_B	shARL13b_1	0.722311	0.484081	VC2589	VC2589_S9
Maximum-2	27	Average	0.0408044	16754.3	124352	s2 c3 D.tif	GRB_R	shARL13b_1	0.777862	0.484153	VC2589	VC2589_S8
Maximum-3	16	Average	0.0442334	11913.4	95760.9	sh c4 D.tif	GRB_B	shARL13b_1	0.670186	0.487212	VC2589	VC2589_S4
Maximum-2	41	Average	0.0367688	18833.2	128707	sh c7 D.tif	GRB_R	shARL13b_1	0.87438	0.501111	VC2589	VC2589_S6
Maximum-2	16	Average	0.0442334	15971.1	136453	sh c4 D.tif	GRB_R	shARL13b_1	0.741501	0.53127	VC2589	VC2589_S4
Maximum-3	41	Average	0.0367688	13669.4	105294	sh c7 D.tif	GRB_B	shARL13b_1	0.76897	0.535715	VC2589	VC2589_S6
Maximum-2	28	Average	0.0527696	15732.1	144669	s2 c4 D.tif	GRB_R	shARL13b_1	0.730404	0.563259	VC2589	VC2589_S8
Maximum-2	15	Average	0.0454678	18635	145432	s2 c6 D.tif	GRB_R	shARL13b_1	0.86518	0.56623	VC2589	VC2589_S9
Maximum-3	31	Average	0.0435476	15273.5	115483	sh c6 D.tif	GRB_B	shARL13b_1	0.859211	0.587553	VC2589	VC2589_S5
Maximum-3	0	Average	0.0510055	11419.1	116247	s2 c1 D.tif	GRB_B	shARL13b_1	0.642381	0.591442	VC2589	VC2589_S7
Maximum-2	0	Average	0.0510055	15563.9	157764	s2 c1 D.tif	GRB_R	shARL13b_1	0.722594	0.614242	VC2589	VC2589_S7
Maximum-2	35	Average	0.0489653	17065.3	163358	s2 c5 D.tif	GRB_R	shARL13b_1	0.792301	0.636023	VC2589	VC2589_S9
Maximum-3	28	Average	0.0527696	13311.5	133471	s2 c4 D.tif	GRB_B	shARL13b_1	0.748838	0.679075	VC2589	VC2589_S8
Maximum-3	27	Average	0.0408044	17919.2	135014	s2 c3 D.tif	GRB_B	shARL13b_1	1.00804	0.686926	VC2589	VC2589_S8
Maximum-2	19	Average	0.0507973	18497.2	178504	s2 c2 D.tif	GRB_R	shARL13b_1	0.858781	0.69499	VC2589	VC2589_S7
Maximum-3	35	Average	0.0489653	21443	196028	s2 c5 D.tif	GRB_B	shARL13b_1	1.20628	0.997353	VC2589	VC2589_S9
Maximum-3	19	Average	0.0507973	21380.6	202813	s2 c2 D.tif	GRB_B	shARL13b_1	1.20277	1.03187	VC2589	VC2589_S7
Blue	56	Average	0.0882816	14400.5	74231.7	Copy of Image 2_Maximum intensity projection.tif	GRB_B	CTL	0.944072	0.967193	VC2616	VC2616_S1
Red	59	Average	0.086328	18149.2	93972.3	Copy of Image 5_Maximum intensity projection.tif	GRB_R	CTL	0.980318	0.998155	VC2616	VC2616_S2
Red	56	Average	0.0882816	18877.9	94319.6	Copy of Image 2_Maximum intensity projection.tif	GRB_R	CTL	1.01968	1.00184	VC2616	VC2616_S1
Blue	59	Average	0.086328	16106.7	79267.6	Copy of Image 5_Maximum intensity projection.tif	GRB_B	CTL	1.05593	1.03281	VC2616	VC2616_S2
Blue	2	Average	0.113053	11532.5	78008.4	Copy of Image 14_Maximum intensity projection.tif	GRB_B	shARL13b_1	0.756054	1.0164	VC2616	VC2616_S4
Red	5	Average	0.110352	22671.6	160921	Copy of Image 8_Maximum intensity projection.tif	GRB_R	shARL13b_1	1.2246	1.70928	VC2616	VC2616_S5
Blue	5	Average	0.110352	19489.2	132270	Copy of Image 8_Maximum intensity projection.tif	GRB_B	shARL13b_1	1.27768	1.72339	VC2616	VC2616_S5
Red	2	Average	0.113053	27974.7	189174	Copy of Image 14_Maximum intensity projection.tif	GRB_R	shARL13b_1	1.51104	2.00937	VC2616	VC2616_S4
Blue	21	Average	0.0840897	12410.1	59301.2	Copy of Image 6_Maximum intensity projection.tif	GRB_B	CTL	0.760197	0.688765	VC2617	VC2617_S3
Red	21	Average	0.0840897	16660.3	78582.1	Copy of Image 6_Maximum intensity projection.tif	GRB_R	CTL	1.0218	0.885347	VC2617	VC2617_S3
Blue	19	Average	0.102221	14002.5	79874.5	Copy of Image 21_Maximum intensity projection.tif	GRB_B	CTL	0.857745	0.927716	VC2617	VC2617_S2
Red	19	Average	0.102221	13774.8	82942.2	Copy of Image 21_Maximum intensity projection.tif	GRB_R	CTL	0.844826	0.93447	VC2617	VC2617_S2
Red	11	Average	0.0908226	18479.6	104751	Copy of Image 16_Maximum intensity projection.tif	GRB_R	CTL	1.13338	1.18018	VC2617	VC2617_S1
Blue	11	Average	0.0908226	22561.8	119118	Copy of Image 16_Maximum intensity projection.tif	GRB_B	CTL	1.38206	1.38352	VC2617	VC2617_S1
Blue	31	Average	0.0904924	13546.1	70099.9	Copy of Image 3_Maximum intensity projection.tif	GRB_B	shARL13b_1	0.829785	0.814188	VC2617	VC2617_S6
Red	30	Average	0.077616	14285.5	75838.4	Copy of Image 25_Maximum intensity projection.tif	GRB_R	shARL13b_1	0.876148	0.854435	VC2617	VC2617_S5
Blue	27	Average	0.0949889	14434.2	76352.3	Copy of Image 12_Maximum intensity projection.tif	GRB_B	shARL13b_1	0.884189	0.886807	VC2617	VC2617_S4
Blue	30	Average	0.077616	16437.3	79571.7	Copy of Image 25_Maximum intensity projection.tif	GRB_B	shARL13b_1	1.00689	0.9242	VC2617	VC2617_S5
Red	27	Average	0.0949889	14807.3	83765	Copy of Image 12_Maximum intensity projection.tif	GRB_R	shARL13b_1	0.908152	0.94374	VC2617	VC2617_S4
Red	31	Average	0.0904924	15906.9	85276.6	Copy of Image 3_Maximum intensity projection.tif	GRB_R	shARL13b_1	0.97559	0.960771	VC2617	VC2617_S6
Blue	33	Average	0.0935259	19725.7	106001	Copy of Image 9_Maximum intensity projection.tif	GRB_B	shARL13b_1	1.20833	1.23117	VC2617	VC2617_S7
Red	33	Average	0.0935259	22339.8	130054	Copy of Image 9_Maximum intensity projection.tif	GRB_R	shARL13b_1	1.37013	1.46526	VC2617	VC2617_S7
Blue	53	Average	0.093456	12380.3	68772.7	Copy of Image 16_Maximum intensity projection.tif	GRB_B	CTL	0.814676	0.74288	VC2619	VC2619_S2
Red	53	Average	0.093456	20359.9	111302	Copy of Image 16_Maximum intensity projection.tif	GRB_R	CTL	0.906659	0.80593	VC2619	VC2619_S2
Red	50	Average	0.0969363	21500.8	130072	Copy of Image 12_Maximum intensity projection.tif	GRB_R	CTL	0.957464	0.941839	VC2619	VC2619_S1
Blue	56	Average	0.107033	13941.5	93159.1	Copy of Image 7_Maximum intensity projection.tif	GRB_B	CTL	0.917408	1.0063	VC2619	VC2619_S3
Blue	50	Average	0.0969363	19268.1	115796	Copy of Image 12_Maximum intensity projection.tif	GRB_B	CTL	1.26792	1.25082	VC2619	VC2619_S1
Red	56	Average	0.107033	25507.3	172938	Copy of Image 7_Maximum intensity projection.tif	GRB_R	CTL	1.13588	1.25223	VC2619	VC2619_S3
Red	0	Average	0.0944917	16771.1	94281.2	Copy of Image 2_Maximum intensity projection.tif	GRB_R	shARL13b_1	0.746842	0.682682	VC2619	VC2619_S5
Red	2	Average	0.098604	16827.7	104307	Copy of Image 9_Maximum intensity projection.tif	GRB_R	shARL13b_1	0.749365	0.755278	VC2619	VC2619_S6
Blue	0	Average	0.0944917	14241.5	78568.6	Copy of Image 2_Maximum intensity projection.tif	GRB_B	shARL13b_1	0.937148	0.848694	VC2619	VC2619_S5
Red	57	Average	0.109707	18581.8	126379	Copy of Image 19_Maximum intensity projection.tif	GRB_R	shARL13b_1	0.827478	0.9151	VC2619	VC2619_S4
Blue	2	Average	0.098604	20206.9	122444	Copy of Image 9_Maximum intensity projection.tif	GRB_B	shARL13b_1	1.3297	1.32263	VC2619	VC2619_S6
Blue	57	Average	0.109707	25890.9	173202	Copy of Image 19_Maximum intensity projection.tif	GRB_B	shARL13b_1	1.70373	1.87092	VC2619	VC2619_S4
Red	7	Average	0.08712	7919.4	42299.3	6.tif	GRB_R	CTL	0.656015	0.50546	VC2885	VC2885_S2
Blue	7	Average	0.08712	5268.47	28140.9	6.tif	GRB_B	CTL	0.84978	0.678786	VC2885	VC2885_S2
Red	10	Average	0.0991366	13080.2	83250.8	7.tif	GRB_R	CTL	1.08352	0.994814	VC2885	VC2885_S2
Blue	12	Average	0.12584	5695.96	43161.1	8.tif	GRB_B	CTL	0.918732	1.04109	VC2885	VC2885_S2
Blue	4	Average	0.126946	6012.51	43813.5	12.tif	GRB_B	CTL	0.96979	1.05683	VC2885	VC2885_S4
Red	12	Average	0.12584	13144.9	95946.2	8.tif	GRB_R	CTL	1.08888	1.14652	VC2885	VC2885_S2
Blue	10	Average	0.0991366	7822.28	50715.1	7.tif	GRB_B	CTL	1.2617	1.2233	VC2885	VC2885_S2
Red	4	Average	0.126946	14143.3	113243	12.tif	GRB_R	CTL	1.17158	1.35321	VC2885	VC2885_S4
Red	17	Average	0.11616	11283.7	77014.5	2.tif	GRB_R	shARL13b_1	0.934703	0.920292	VC2885	VC2885_S1
Blue	20	Average	0.114301	5559.87	38932.2	9.tif	GRB_B	shARL13b_1	0.896782	0.939085	VC2885	VC2885_S3
Red	20	Average	0.114301	13134	88547.6	9.tif	GRB_R	shARL13b_1	1.08798	1.05811	VC2885	VC2885_S3
Red	15	Average	0.120134	12972.4	98265.5	11.tif	GRB_R	shARL13b_1	1.07459	1.17423	VC2885	VC2885_S3
Blue	17	Average	0.11616	7053.43	51274.1	2.tif	GRB_B	shARL13b_1	1.13769	1.23678	VC2885	VC2885_S1
Blue	15	Average	0.120134	8993.16	71433.6	11.tif	GRB_B	shARL13b_1	1.45056	1.72305	VC2885	VC2885_S3
Red	19	Average	0.157574	16366.9	146347	3.tif	GRB_R	shARL13b_1	1.35578	1.74879	VC2885	VC2885_S1
Blue	19	Average	0.157574	8877.11	86008.4	3.tif	GRB_B	shARL13b_1	1.43184	2.07461	VC2885	VC2885_S1

## Sheet: SuppFig2b_48h
Image.Name	Minute	Summary.Statistic	Area	Average.intensity	Total.intensity	Image	Overlay	Treatment	NormAvgAVG	NormAvgTOT	Dissociation
Red	47	Average	0.084942	10397.2	53851.8	Copy of Image 1_Maximum intensity projection.tif	GRB_R	CTL	1.37721	0.984791	VC2901
Red	49	Average	0.114501	7795.29	55486.2	Copy of Image 2_Maximum intensity projection.tif	GRB_R	CTL	1.03256	1.01468	VC2901
Red	52	Average	0.136488	6952.26	58645.3	Copy of Image 3_Maximum intensity projection.tif	GRB_R	CTL	0.920895	1.07245	VC2901
Red	55	Average	0.0901241	6340.25	35481.7	Copy of Image 4_Maximum intensity projection.tif	GRB_R	CTL	0.839828	0.648857	VC2901
Red	57	Average	0.107033	5527.13	38655.9	Copy of Image 5_Maximum intensity projection.tif	GRB_R	CTL	0.732122	0.706904	VC2901
Red	0	Average	0.164076	8284.68	85979.7	Copy of Image 6_Maximum intensity projection.tif	GRB_R	CTL	1.09739	1.57232	VC2901
Red	2	Average	0.105291	6983.37	45160.3	Copy of Image 10_Maximum intensity projection.tif	GRB_R	shARL13b_2	0.925015	0.82585	VC2901
Red	5	Average	0.106378	7456.77	49598.8	Copy of Image 11_Maximum intensity projection.tif	GRB_R	shARL13b_2	0.987721	0.907017	VC2901
Red	7	Average	0.12147	10586.8	88400.5	Copy of Image 12_Maximum intensity projection.tif	GRB_R	shARL13b_2	1.40233	1.61659	VC2901
Red	9	Average	0.0991828	8845.55	64983.9	Copy of Image 13_Maximum intensity projection.tif	GRB_R	shARL13b_2	1.17168	1.18837	VC2901
Red	11	Average	0.108346	8314.2	55538.5	Copy of Image 7_Maximum intensity projection.tif	GRB_R	shARL13b_2	1.1013	1.01564	VC2901
Red	12	Average	0.094743	8507.99	45608.3	Copy of Image 8_Maximum intensity projection.tif	GRB_R	shARL13b_2	1.12697	0.834042	VC2901
Red	14	Average	0.12584	10986.1	77957.4	Copy of Image 9_Maximum intensity projection.tif	GRB_R	shARL13b_2	1.45521	1.42561	VC2901
Red	15	Average	0.135907	11109.2	90743.7	Copy of Image 14_Maximum intensity projection.tif	GRB_R	sh1826	1.47152	1.65944	VC2901
Red	18	Average	0.118338	8837.76	65574.2	Copy of Image 15_Maximum intensity projection.tif	GRB_R	sh1826	1.17065	1.19916	VC2901
Red	20	Average	0.112586	5608.47	41595.2	Copy of Image 16_Maximum intensity projection.tif	GRB_R	sh1826	0.742897	0.760654	VC2901
Red	22	Average	0.121968	9581.23	70375.7	Copy of Image 17_Maximum intensity projection.tif	GRB_R	sh1826	1.26913	1.28697	VC2901
Blue	47	Average	0.084942	7291.9	36932.8	Copy of Image 1_Maximum intensity projection.tif	GRB_B	CTL	0.938766	0.639726	VC2901
Blue	49	Average	0.114501	9602.69	72491.6	Copy of Image 2_Maximum intensity projection.tif	GRB_B	CTL	1.23626	1.25565	VC2901
Blue	52	Average	0.136488	6294	50508.3	Copy of Image 3_Maximum intensity projection.tif	GRB_B	CTL	0.810296	0.874873	VC2901
Blue	55	Average	0.0901241	7155.55	37510.2	Copy of Image 4_Maximum intensity projection.tif	GRB_B	CTL	0.921212	0.649728	VC2901
Blue	57	Average	0.107033	6720.68	44417.8	Copy of Image 5_Maximum intensity projection.tif	GRB_B	CTL	0.865227	0.769377	VC2901
Blue	0	Average	0.164076	9540.4	104532	Copy of Image 6_Maximum intensity projection.tif	GRB_B	CTL	1.22824	1.81064	VC2901
Blue	2	Average	0.105291	5976.06	36320.1	Copy of Image 10_Maximum intensity projection.tif	GRB_B	shARL13b_2	0.769364	0.629114	VC2901
Blue	5	Average	0.106378	8028.43	51372.4	Copy of Image 11_Maximum intensity projection.tif	GRB_B	shARL13b_2	1.03359	0.889841	VC2901
Blue	7	Average	0.12147	9132.88	71174	Copy of Image 12_Maximum intensity projection.tif	GRB_B	shARL13b_2	1.17578	1.23283	VC2901
Blue	9	Average	0.0991828	9261.63	57488.2	Copy of Image 13_Maximum intensity projection.tif	GRB_B	shARL13b_2	1.19235	0.995773	VC2901
Blue	11	Average	0.108346	5621.39	37091.8	Copy of Image 7_Maximum intensity projection.tif	GRB_B	shARL13b_2	0.723703	0.64248	VC2901
Blue	12	Average	0.094743	6785.61	33477.4	Copy of Image 8_Maximum intensity projection.tif	GRB_B	shARL13b_2	0.873586	0.579874	VC2901
Blue	14	Average	0.12584	6223.18	48053	Copy of Image 9_Maximum intensity projection.tif	GRB_B	shARL13b_2	0.801179	0.832343	VC2901
Blue	15	Average	0.135907	7538.14	58906.8	Copy of Image 14_Maximum intensity projection.tif	GRB_B	sh1826	0.970467	1.02035	VC2901
Blue	18	Average	0.118338	7796.24	57371.1	Copy of Image 15_Maximum intensity projection.tif	GRB_B	sh1826	1.0037	0.993745	VC2901
Blue	20	Average	0.112586	6534.79	42344.2	Copy of Image 16_Maximum intensity projection.tif	GRB_B	sh1826	0.841295	0.73346	VC2901
Blue	22	Average	0.121968	8094.22	60924.1	Copy of Image 17_Maximum intensity projection.tif	GRB_B	sh1826	1.04206	1.05529	VC2901
Red	34	Average	0.079376	8883.05	41178.7	10.tif	GRB_R	CTL	0.861123	0.606108	VC2900
Red	39	Average	0.107712	11535.1	77030.3	2.tif	GRB_R	CTL	1.11821	1.13381	VC2900
Red	43	Average	0.109824	10547.9	70165.3	4.tif	GRB_R	CTL	1.02252	1.03276	VC2900
Red	46	Average	0.0970766	10444.5	57902.4	5.tif	GRB_R	CTL	1.01249	0.852264	VC2900
Red	50	Average	0.11088	11020.4	75702.5	6.tif	GRB_R	CTL	1.06832	1.11426	VC2900
Red	53	Average	0.136903	11901.3	105143	7.tif	GRB_R	CTL	1.15371	1.5476	VC2900
Red	58	Average	0.089056	7877.44	48454.4	9.tif	GRB_R	CTL	0.763638	0.7132	VC2900
Red	1	Average	0.109024	9447.64	62090.7	12.tif	GRB_R	shARL13b_2	0.915854	0.913912	VC2900
Red	13	Average	0.126946	7718.3	56763.3	16.tif	GRB_R	shARL13b_2	0.748212	0.835497	VC2900
Red	16	Average	0.0991828	8801.78	55447.6	17.tif	GRB_R	shARL13b_2	0.853244	0.816132	VC2900
Red	17	Average	0.13068	10227.7	76771.6	18.tif	GRB_R	sh1826	0.991473	1.13	VC2900
Red	21	Average	0.090024	9760.93	53557.9	20.tif	GRB_R	sh1826	0.946224	0.788318	VC2900
Red	24	Average	0.103092	10944.3	64389.1	21.tif	GRB_R	sh1826	1.06094	0.947741	VC2900
Red	27	Average	0.099099	10223.2	58852.8	22.tif	GRB_R	sh1826	0.991033	0.866254	VC2900
Red	32	Average	0.110767	10967.4	77019.5	23.tif	GRB_R	sh1826	1.06318	1.13365	VC2900
Red	37	Average	0.0924229	11572.9	62018.4	25.tif	GRB_R	sh1826	1.12188	0.912847	VC2900
Blue	34	Average	0.079376	3751.81	16340.3	10.tif	GRB_B	CTL	0.701521	0.458243	VC2900
Blue	39	Average	0.107712	6747.9	46497	2.tif	GRB_B	CTL	1.26174	1.30395	VC2900
Blue	43	Average	0.109824	7289.32	46325.9	4.tif	GRB_B	CTL	1.36297	1.29915	VC2900
Blue	46	Average	0.0970766	4588.26	25676.8	5.tif	GRB_B	CTL	0.857921	0.720071	VC2900
Blue	50	Average	0.11088	5649.09	45953.7	6.tif	GRB_B	CTL	1.05628	1.28871	VC2900
Blue	53	Average	0.136903	4839.62	43966.5	7.tif	GRB_B	CTL	0.90492	1.23298	VC2900
Blue	58	Average	0.089056	4570.81	24850.6	9.tif	GRB_B	CTL	0.854658	0.696901	VC2900
Blue	1	Average	0.109024	7854.29	62217.8	12.tif	GRB_B	shARL13b_2	1.46861	1.74482	VC2900
Blue	13	Average	0.126946	5026.46	41432.1	16.tif	GRB_B	shARL13b_2	0.939857	1.16191	VC2900
Blue	16	Average	0.0991828	6806.92	40565.8	17.tif	GRB_B	shARL13b_2	1.27277	1.13762	VC2900
Blue	17	Average	0.13068	7042.5	58790.6	18.tif	GRB_B	sh1826	1.31682	1.64871	VC2900
Blue	21	Average	0.090024	7244.21	40352.2	20.tif	GRB_B	sh1826	1.35453	1.13163	VC2900
Blue	24	Average	0.103092	5732.19	34827.5	21.tif	GRB_B	sh1826	1.07181	0.976691	VC2900
Blue	27	Average	0.099099	5493.48	30138.6	22.tif	GRB_B	sh1826	1.02718	0.845198	VC2900
Blue	32	Average	0.110767	5547.94	36009.7	23.tif	GRB_B	sh1826	1.03736	1.00984	VC2900
Blue	37	Average	0.0924229	4876.24	29909.5	25.tif	GRB_B	sh1826	0.911768	0.838772	VC2900
Red	1	Average	0.128053	11462.1	96558.4	10.tif	GRB_R	CTL	0.988549	0.917675	VC2903
Red	9	Average	0.167376	12780	142600	12.tif	GRB_R	CTL	1.10221	1.35525	VC2903
Red	11	Average	0.132422	12629.3	112700	13.tif	GRB_R	CTL	1.08921	1.07108	VC2903
Red	13	Average	0.132996	10188.6	89905.7	14.tif	GRB_R	CTL	0.878713	0.854449	VC2903
Red	15	Average	0.124261	9549.58	73438.7	15.tif	GRB_R	CTL	0.823603	0.697949	VC2903
Red	17	Average	0.126129	8953.51	68611.5	16.tif	GRB_R	CTL	0.772195	0.652072	VC2903
Red	18	Average	0.13728	11101.1	97164.8	32.tif	GRB_R	CTL	0.957414	0.923438	VC2903
Red	20	Average	0.165149	15770.3	169637	34.tif	GRB_R	CTL	1.36011	1.6122	VC2903
Red	22	Average	0.150441	11399.3	115425	35.tif	GRB_R	CTL	0.983133	1.09698	VC2903
Red	24	Average	0.140637	12266.6	106124	37.tif	GRB_R	CTL	1.05793	1.00858	VC2903
Red	26	Average	0.152299	11963.5	109104	38.tif	GRB_R	CTL	1.03179	1.03691	VC2903
Red	27	Average	0.12453	11074.8	81379.7	39.tif	GRB_R	CTL	0.955143	0.773419	VC2903
Red	31	Average	0.126248	9740.91	77263.3	22.tif	GRB_R	sh1826	0.840104	0.734298	VC2903
Red	34	Average	0.0899078	10916	62808	23.tif	GRB_R	sh1826	0.941451	0.596917	VC2903
Red	35	Average	0.152271	10264.1	98296	24.tif	GRB_R	sh1826	0.88523	0.934189	VC2903
Red	37	Average	0.139036	13833.7	123366	25.tif	GRB_R	sh1826	1.19308	1.17245	VC2903
Red	41	Average	0.156146	12465	121534	26.tif	GRB_R	sh1826	1.07504	1.15504	VC2903
Red	44	Average	0.174937	12740.8	153572	28.tif	GRB_R	sh1826	1.09883	1.45952	VC2903
Red	46	Average	0.127776	11150.5	88016.8	29.tif	GRB_R	sh1826	0.961672	0.836497	VC2903
Red	50	Average	0.146362	9422.36	85942	30.tif	GRB_R	sh1826	0.812631	0.816778	VC2903
Red	51	Average	0.164906	14963.6	150010	31.tif	GRB_R	sh1826	1.29054	1.42567	VC2903
Red	54	Average	0.146678	11886.6	112214	5.tif	GRB_R	sh1826	1.02516	1.06647	VC2903
Red	57	Average	0.140885	14520.3	129807	7.tif	GRB_R	sh1826	1.2523	1.23366	VC2903
Red	59	Average	0.125779	10819.1	80926.2	8.tif	GRB_R	sh1826	0.933095	0.769109	VC2903
Red	1	Average	0.14948	13819	134499	9.tif	GRB_R	sh1826	1.19182	1.27826	VC2903
Red	2	Average	0.13068	11469.7	100959	17.tif	GRB_R	shARL13b_2	0.989204	0.959495	VC2903
Red	5	Average	0.127292	10244.9	78060	19.tif	GRB_R	shARL13b_2	0.883572	0.741869	VC2903
Red	7	Average	0.145864	11978.8	107602	20.tif	GRB_R	shARL13b_2	1.03311	1.02264	VC2903
Red	9	Average	0.113727	9059.53	64668.4	21.tif	GRB_R	shARL13b_2	0.781339	0.614597	VC2903
Red	12	Average	0.126677	10543.6	82902.4	40.tif	GRB_R	shARL13b_2	0.909332	0.78789	VC2903
Red	14	Average	0.108803	7929.45	54232.2	41.tif	GRB_R	shARL13b_2	0.683875	0.515414	VC2903
Red	16	Average	0.126448	8905.62	76003.2	42.tif	GRB_R	shARL13b_2	0.768065	0.722322	VC2903
Red	18	Average	0.167065	10205.7	111807	43.tif	GRB_R	shARL13b_2	0.880194	1.0626	VC2903
Red	20	Average	0.143889	10192.6	84682.2	44.tif	GRB_R	shARL13b_2	0.879063	0.804805	VC2903
Blue	1	Average	0.128053	8153.79	68640.8	10.tif	GRB_B	CTL	1.07211	1.01739	VC2903
Blue	9	Average	0.167376	6598.27	69146.7	12.tif	GRB_B	CTL	0.867582	1.02489	VC2903
Blue	11	Average	0.132422	9991.52	96204.5	13.tif	GRB_B	CTL	1.31375	1.42594	VC2903
Blue	13	Average	0.132996	6384.65	54421.1	14.tif	GRB_B	CTL	0.839493	0.806627	VC2903
Blue	15	Average	0.124261	6418.01	50184.7	15.tif	GRB_B	CTL	0.84388	0.743834	VC2903
Blue	17	Average	0.126129	11434.1	84556.3	16.tif	GRB_B	CTL	1.50343	1.25329	VC2903
Blue	18	Average	0.13728	5721.18	45531.5	32.tif	GRB_B	CTL	0.752257	0.674866	VC2903
Blue	20	Average	0.165149	7456.64	78809.7	34.tif	GRB_B	CTL	0.980445	1.16811	VC2903
Blue	22	Average	0.150441	8055.68	83003.8	35.tif	GRB_B	CTL	1.05921	1.23028	VC2903
Blue	24	Average	0.140637	5669.02	53774.7	37.tif	GRB_B	CTL	0.745398	0.797046	VC2903
Blue	26	Average	0.152299	8696.75	76351.1	38.tif	GRB_B	CTL	1.1435	1.13167	VC2903
Blue	27	Average	0.12453	6684.69	48985.1	39.tif	GRB_B	CTL	0.878945	0.726055	VC2903
Blue	31	Average	0.126248	6310.3	50574.6	22.tif	GRB_B	sh1826	0.829718	0.749614	VC2903
Blue	34	Average	0.0899078	7261.69	36355.2	23.tif	GRB_B	sh1826	0.954812	0.538855	VC2903
Blue	35	Average	0.152271	5882.49	54366.9	24.tif	GRB_B	sh1826	0.773467	0.805823	VC2903
Blue	37	Average	0.139036	5980.14	50786.2	25.tif	GRB_B	sh1826	0.786306	0.75275	VC2903
Blue	41	Average	0.156146	7432.15	68423.7	26.tif	GRB_B	sh1826	0.977226	1.01417	VC2903
Blue	44	Average	0.174937	11376.6	151334	28.tif	GRB_B	sh1826	1.49587	2.24306	VC2903
Blue	46	Average	0.127776	6841.75	53410.2	29.tif	GRB_B	sh1826	0.899596	0.791643	VC2903
Blue	50	Average	0.146362	5566.72	51513.9	30.tif	GRB_B	sh1826	0.731947	0.763536	VC2903
Blue	51	Average	0.164906	9709.97	104543	31.tif	GRB_B	sh1826	1.27673	1.54953	VC2903
Blue	54	Average	0.146678	6993.16	67900.2	5.tif	GRB_B	sh1826	0.919504	1.00641	VC2903
Blue	57	Average	0.140885	10234.1	94748.8	7.tif	GRB_B	sh1826	1.34564	1.40436	VC2903
Blue	59	Average	0.125779	5997.47	44547.7	8.tif	GRB_B	sh1826	0.788585	0.660284	VC2903
Blue	1	Average	0.14948	6776.72	63612.9	9.tif	GRB_B	sh1826	0.891045	0.942868	VC2903
Blue	2	Average	0.13068	7663.71	61021	17.tif	GRB_B	shARL13b_2	1.00767	0.90445	VC2903
Blue	5	Average	0.127292	6819.33	52571	19.tif	GRB_B	shARL13b_2	0.896648	0.779205	VC2903
Blue	7	Average	0.145864	7681.94	69666.6	20.tif	GRB_B	shARL13b_2	1.01007	1.0326	VC2903
Blue	9	Average	0.113727	6541.65	43898.5	21.tif	GRB_B	shARL13b_2	0.860137	0.650662	VC2903
Blue	12	Average	0.126677	6991.86	54839.8	40.tif	GRB_B	shARL13b_2	0.919333	0.812833	VC2903
Blue	14	Average	0.108803	11610.5	81001.7	41.tif	GRB_B	shARL13b_2	1.52663	1.2006	VC2903
Blue	16	Average	0.126448	8905.2	73845.7	42.tif	GRB_B	shARL13b_2	1.17091	1.09454	VC2903
Blue	18	Average	0.167065	12281.9	129670	43.tif	GRB_B	shARL13b_2	1.6149	1.92197	VC2903
Blue	20	Average	0.143889	5411.27	44433.5	44.tif	GRB_B	shARL13b_2	0.711507	0.658591	VC2903
