# Supplementary material for: Ciliary neuropeptidergic signaling dynamically regulates excitatory synapses in postnatal neocortical pyramidal neurons
Source: eLife. 2021 Mar 2;10:e65427. doi: 10.7554/eLife.65427 (PMC7952091; doi:10.7554/eLife.65427)
Supplement: Figure 2—source data 1. [file elife-65427-fig2-data1.xlsx]

## Sheet: Figure_2C_24h
Image.Name	Hour	Minute	Sec	Summary.Statistic	Area	Average.intensity	Total.intensity	Image	Overlay	Treatment	NormAvgAVG	NormAvgTOT	Dissociation	Time
Red	1 day, 13:00:00	1 day, 6:00:00	137	Average	0.074052	31721.2	141978	Copy of Image 11_Maximum intensity projection.tif	GRB_R	CTL	1.22469	1.14331	VC2604	24h
Red	1 day, 17:00:00	1 day, 15:00:00	142	Average	0.10164	25944.1	150917	Copy of Image 23_Maximum intensity projection.tif	GRB_R	CTL	1.00165	1.2153	VC2604	24h
Red	1 day, 22:00:00	2 days, 1:00:00	360	Average	0.0951618	24271.9	135986	Copy of Image 32_Maximum intensity projection.tif	GRB_R	CTL	0.937087	1.09506	VC2604	24h
Red	2 days, 1:00:00	2 days, 5:00:00	145	Average	0.082368	21309.5	102249	Copy of Image 42_Maximum intensity projection.tif	GRB_R	CTL	0.822714	0.823384	VC2604	24h
Red	2 days, 4:00:00	1 day, 4:00:00	458	Average	0.069696	22677.1	90708.5	Copy of Image 44_Maximum intensity projection.tif	GRB_R	CTL	0.875515	0.730454	VC2604	24h
Red	2 days, 9:00:00	12:00:00	536	Average	0.092928	23196	129393	Copy of Image 46_Maximum intensity projection.tif	GRB_R	CTL	0.895546	1.04197	VC2604	24h
Red	2 days, 11:00:00	1 day, 15:00:00	877	Average	0.075504	30592.2	135348	Copy of Image 5_Maximum intensity projection.tif	GRB_R	CTL	1.1811	1.08993	VC2604	24h
Red	03:00:00	01:00:00	454	Average	0.068244	27499.8	106869	Copy of Image 7_Maximum intensity projection.tif	GRB_R	CTL	1.06171	0.860591	VC2604	24h
Blue	1 day, 13:00:00	1 day, 6:00:00	177	Average	0.074052	18135	84574.6	Copy of Image 11_Maximum intensity projection.tif	GRB_B	CTL	1.03201	0.984089	VC2604	24h
Blue	1 day, 17:00:00	1 day, 15:00:00	217	Average	0.10164	25074.5	153203	Copy of Image 23_Maximum intensity projection.tif	GRB_B	CTL	1.42691	1.78263	VC2604	24h
Blue	1 day, 22:00:00	2 days, 1:00:00	410	Average	0.0951618	14960.4	87347.1	Copy of Image 32_Maximum intensity projection.tif	GRB_B	CTL	0.851349	1.01635	VC2604	24h
Blue	2 days, 1:00:00	2 days, 5:00:00	199	Average	0.082368	17790.8	83027.6	Copy of Image 42_Maximum intensity projection.tif	GRB_B	CTL	1.01242	0.966089	VC2604	24h
Blue	2 days, 4:00:00	1 day, 4:00:00	484	Average	0.069696	18558.1	74232.4	Copy of Image 44_Maximum intensity projection.tif	GRB_B	CTL	1.05609	0.86375	VC2604	24h
Blue	2 days, 9:00:00	12:00:00	576	Average	0.092928	14268	76746.2	Copy of Image 46_Maximum intensity projection.tif	GRB_B	CTL	0.811951	0.893	VC2604	24h
Blue	2 days, 11:00:00	1 day, 15:00:00	929	Average	0.075504	15015.9	63279	Copy of Image 5_Maximum intensity projection.tif	GRB_B	CTL	0.854509	0.736299	VC2604	24h
Blue	03:00:00	01:00:00	494	Average	0.068244	16777.5	65126.1	Copy of Image 7_Maximum intensity projection.tif	GRB_B	CTL	0.954757	0.757791	VC2604	24h
Red	2 days, 5:00:00	20:00:00	93	Average	0.0890037	28922.1	150085	Copy of Image 15_Maximum intensity projection.tif	GRB_R	shARL13b_1	1.11662	1.2086	VC2604	24h
Red	2 days, 11:00:00	1 day, 18:00:00	84	Average	0.0931514	29766.2	159580	Copy of Image 17_Maximum intensity projection.tif	GRB_R	shARL13b_1	1.14921	1.28506	VC2604	24h
Red	03:00:00	2 days, 5:00:00	588	Average	0.0887535	32036.5	174163	Copy of Image 19_Maximum intensity projection.tif	GRB_R	shARL13b_1	1.23686	1.40249	VC2604	24h
Red	06:00:00	1 day, 13:00:00	364	Average	0.110552	26986.3	172157	Copy of Image 21_Maximum intensity projection.tif	GRB_R	shARL13b_1	1.04188	1.38634	VC2604	24h
Red	12:00:00	1 day, 3:00:00	832	Average	0.100188	26147.2	148879	Copy of Image 37_Maximum intensity projection.tif	GRB_R	shARL13b_1	1.00949	1.19889	VC2604	24h
Red	13:00:00	2 days, 2:00:00	477	Average	0.0830991	24217.9	119107	Copy of Image 40_Maximum intensity projection.tif	GRB_R	shARL13b_1	0.935	0.959144	VC2604	24h
Red	15:00:00	1 day, 7:00:00	983	Average	0.108671	27045.8	175881	Copy of Image 48_Maximum intensity projection.tif	GRB_R	shARL13b_1	1.04418	1.41633	VC2604	24h
Red	1 day, 8:00:00	2 days, 8:00:00	723	Average	0.0940896	24260.2	132681	Copy of Image 50_Maximum intensity projection.tif	GRB_R	shARL13b_1	0.936633	1.06845	VC2604	24h
Red	1 day, 10:00:00	2 days, 9:00:00	10	Average	0.088572	29616.2	154452	Copy of Image 54_Maximum intensity projection.tif	GRB_R	shARL13b_1	1.14342	1.24377	VC2604	24h
Blue	2 days, 5:00:00	20:00:00	133	Average	0.0890037	21585.8	111561	Copy of Image 15_Maximum intensity projection.tif	GRB_B	shARL13b_1	1.22838	1.2981	VC2604	24h
Blue	2 days, 11:00:00	1 day, 18:00:00	153	Average	0.0931514	17575.9	100768	Copy of Image 17_Maximum intensity projection.tif	GRB_B	shARL13b_1	1.00019	1.17251	VC2604	24h
Blue	03:00:00	2 days, 5:00:00	635	Average	0.0887535	22301.8	118535	Copy of Image 19_Maximum intensity projection.tif	GRB_B	shARL13b_1	1.26913	1.37924	VC2604	24h
Blue	06:00:00	1 day, 13:00:00	419	Average	0.110552	20308.2	131783	Copy of Image 21_Maximum intensity projection.tif	GRB_B	shARL13b_1	1.15568	1.53339	VC2604	24h
Blue	12:00:00	1 day, 3:00:00	887	Average	0.100188	17631.1	109862	Copy of Image 37_Maximum intensity projection.tif	GRB_B	shARL13b_1	1.00333	1.27832	VC2604	24h
Blue	13:00:00	2 days, 2:00:00	538	Average	0.0830991	20604.8	106350	Copy of Image 40_Maximum intensity projection.tif	GRB_B	shARL13b_1	1.17256	1.23746	VC2604	24h
Blue	15:00:00	1 day, 8:00:00	35	Average	0.108671	18866.4	125403	Copy of Image 48_Maximum intensity projection.tif	GRB_B	shARL13b_1	1.07363	1.45916	VC2604	24h
Blue	1 day, 8:00:00	2 days, 8:00:00	802	Average	0.0940896	22394.3	120612	Copy of Image 50_Maximum intensity projection.tif	GRB_B	shARL13b_1	1.27439	1.40341	VC2604	24h
Blue	1 day, 10:00:00	2 days, 9:00:00	73	Average	0.088572	20604.5	106898	Copy of Image 54_Maximum intensity projection.tif	GRB_B	shARL13b_1	1.17254	1.24383	VC2604	24h
Red	04:05:00	06:05:00	10	Average	0.106165	23904.8	153216	Copy of Image 13_Maximum intensity projection.tif	GRB_R	CTL	1.02736	1.1002	VC2605	24h
Red	01:04:00	03:02:00	8	Average	0.0960028	22679.2	126803	Copy of Image 19_Maximum intensity projection.tif	GRB_R	CTL	0.974693	0.910539	VC2605	24h
Red	04:03:00	03:03:00	68	Average	0.092928	21038.2	119603	Copy of Image 21_Maximum intensity projection.tif	GRB_R	CTL	0.90417	0.858835	VC2605	24h
Red	05:05:00	07:06:00	19	Average	0.109626	24140.1	159159	Copy of Image 31_Maximum intensity projection.tif	GRB_R	CTL	1.03748	1.14288	VC2605	24h
Red	07:04:00	07:00:00	98	Average	0.097768	24220.1	136424	Copy of Image 33_Maximum intensity projection.tif	GRB_R	CTL	1.04092	0.979624	VC2605	24h
Red	00:03:00	03:06:00	57	Average	0.100876	23625.7	140365	Copy of Image 40_Maximum intensity projection.tif	GRB_R	CTL	1.01537	1.00792	VC2605	24h
Blue	04:05:00	06:05:00	67	Average	0.106165	25459.1	155755	Copy of Image 13_Maximum intensity projection.tif	GRB_B	CTL	1.38998	1.39152	VC2605	24h
Blue	01:04:00	03:02:00	63	Average	0.0960028	15893.9	89041.7	Copy of Image 19_Maximum intensity projection.tif	GRB_B	CTL	0.867753	0.795501	VC2605	24h
Blue	04:03:00	03:04:00	21	Average	0.092928	18518.7	123253	Copy of Image 21_Maximum intensity projection.tif	GRB_B	CTL	1.01106	1.10115	VC2605	24h
Blue	05:05:00	07:06:00	59	Average	0.109626	16044.3	107078	Copy of Image 31_Maximum intensity projection.tif	GRB_B	CTL	0.875962	0.956635	VC2605	24h
Blue	07:04:00	07:01:00	58	Average	0.097768	19026.4	109664	Copy of Image 33_Maximum intensity projection.tif	GRB_B	CTL	1.03877	0.979744	VC2605	24h
Blue	00:03:00	03:07:00	47	Average	0.100876	14954.7	86797.3	Copy of Image 40_Maximum intensity projection.tif	GRB_B	CTL	0.816473	0.77545	VC2605	24h
Red	09:02:00	00:03:00	86	Average	0.103554	23785.1	148726	Copy of Image 17_Maximum intensity projection.tif	GRB_R	shARL13b_1	1.02222	1.06796	VC2605	24h
Red	04:00:00	05:08:00	81	Average	0.0993813	25449.5	151298	Copy of Image 23_Maximum intensity projection.tif	GRB_R	shARL13b_1	1.09375	1.08643	VC2605	24h
Red	07:04:00	06:00:00	25	Average	0.107158	27216.6	167666	Copy of Image 27_Maximum intensity projection.tif	GRB_R	shARL13b_1	1.1697	1.20396	VC2605	24h
Red	00:01:00	00:07:00	84	Average	0.0840452	23044.7	111303	Copy of Image 29_Maximum intensity projection.tif	GRB_R	shARL13b_1	0.990402	0.799233	VC2605	24h
Red	01:02:00	01:06:00	38	Average	0.0996653	29545.8	175692	Copy of Image 37.ome_Maximum intensity projection.tif	GRB_R	shARL13b_1	1.2698	1.26159	VC2605	24h
Blue	09:02:00	00:04:00	60	Average	0.103554	19576.7	120236	Copy of Image 17_Maximum intensity projection.tif	GRB_B	shARL13b_1	1.06882	1.07419	VC2605	24h
Blue	04:00:00	05:09:00	29	Average	0.0993813	17262.5	98901.8	Copy of Image 23_Maximum intensity projection.tif	GRB_B	shARL13b_1	0.942471	0.883591	VC2605	24h
Blue	07:04:00	06:00:00	79	Average	0.107158	21139.8	132429	Copy of Image 27_Maximum intensity projection.tif	GRB_B	shARL13b_1	1.15416	1.18313	VC2605	24h
Blue	00:01:00	00:08:00	47	Average	0.0840452	28180.4	140686	Copy of Image 29_Maximum intensity projection.tif	GRB_B	shARL13b_1	1.53855	1.25689	VC2605	24h
Blue	01:02:00	01:06:00	88	Average	0.0996653	17843.2	107025	Copy of Image 37.ome_Maximum intensity projection.tif	GRB_B	shARL13b_1	0.974179	0.956167	VC2605	24h
Red	08:05:00	03:07:00	20	Average	0.11212	24534.8	159360	Copy of Image 12_Maximum intensity projection.tif	GRB_R	CTL	1.12481	1.26342	VC2614	24h
Red	03:01:00	03:09:00	83	Average	0.103519	24312.6	153696	Copy of Image 24_Maximum intensity projection.tif	GRB_R	CTL	1.11463	1.21851	VC2614	24h
Red	05:01:00	07:05:00	18	Average	0.104339	23810.1	144402	Copy of Image 28_Maximum intensity projection.tif	GRB_R	CTL	1.09159	1.14483	VC2614	24h
Red	03:03:00	00:00:00	41	Average	0.0919394	20564.2	110793	Copy of Image 30_Maximum intensity projection.tif	GRB_R	CTL	0.942776	0.878375	VC2614	24h
Red	06:05:00	02:04:00	26	Average	0.100188	19899.9	118709	Copy of Image 32_Maximum intensity projection.tif	GRB_R	CTL	0.912322	0.941132	VC2614	24h
Red	08:05:00	05:07:00	45	Average	0.078408	18416.5	84579.5	Copy of Image 4_Maximum intensity projection.tif	GRB_R	CTL	0.844316	0.670552	VC2614	24h
Red	03:03:00	02:02:00	37	Average	0.078408	19968.2	92975	Copy of Image 11_Maximum intensity projection.tif	GRB_R	CTL	0.915454	0.737112	VC2614	24h
Red	06:03:00	09:04:00	99	Average	0.109989	22992.5	144559	Copy of Image 9_Maximum intensity projection.tif	GRB_R	CTL	1.05411	1.14607	VC2614	24h
Blue	08:05:00	03:07:00	70	Average	0.11212	18269.5	126733	Copy of Image 12_Maximum intensity projection.tif	GRB_B	CTL	0.962078	1.1516	VC2614	24h
Blue	03:01:00	04:00:00	43	Average	0.103519	13497.5	85535.6	Copy of Image 24_Maximum intensity projection.tif	GRB_B	CTL	0.710783	0.777243	VC2614	24h
Blue	05:01:00	07:05:00	88	Average	0.104339	20968	128750	Copy of Image 28_Maximum intensity projection.tif	GRB_B	CTL	1.10418	1.16992	VC2614	24h
Blue	03:03:00	00:00:00	92	Average	0.0919394	19267.5	106408	Copy of Image 30_Maximum intensity projection.tif	GRB_B	CTL	1.01463	0.966902	VC2614	24h
Blue	06:05:00	02:04:00	66	Average	0.100188	22424	122095	Copy of Image 32_Maximum intensity projection.tif	GRB_B	CTL	1.18085	1.10945	VC2614	24h
Blue	08:05:00	05:07:00	85	Average	0.078408	19088.1	86654	Copy of Image 4_Maximum intensity projection.tif	GRB_B	CTL	1.00518	0.787405	VC2614	24h
Blue	03:03:00	02:02:00	90	Average	0.078408	16489.1	76977.4	Copy of Image 11_Maximum intensity projection.tif	GRB_B	CTL	0.86832	0.699476	VC2614	24h
Blue	06:03:00	09:05:00	49	Average	0.109989	21913.6	147248	Copy of Image 9_Maximum intensity projection.tif	GRB_B	CTL	1.15397	1.33801	VC2614	24h
Red	00:00:00	07:06:00	84	Average	0.0972076	25531	150919	Copy of Image 14_Maximum intensity projection.tif	GRB_R	shARL13b_1	1.17048	1.1965	VC2614	24h
Red	04:01:00	07:06:00	34	Average	0.110352	24441.5	153060	Copy of Image 16_Maximum intensity projection.tif	GRB_R	shARL13b_1	1.12054	1.21347	VC2614	24h
Red	04:02:00	05:09:00	96	Average	0.114418	27250.1	174787	Copy of Image 40_Maximum intensity projection.tif	GRB_R	shARL13b_1	1.2493	1.38573	VC2614	24h
Red	02:00:00	04:08:00	88	Average	0.104544	28496.8	173436	Copy of Image 22_Maximum intensity projection.tif	GRB_R	shARL13b_1	1.30645	1.37501	VC2614	24h
Red	04:05:00	07:09:00	37	Average	0.104544	26340.8	154619	Copy of Image 42_Maximum intensity projection.tif	GRB_R	shARL13b_1	1.20761	1.22583	VC2614	24h
Red	06:05:00	08:05:00	9	Average	0.1089	29734.5	190349	Copy of Image 44_Maximum intensity projection.tif	GRB_R	shARL13b_1	1.3632	1.5091	VC2614	24h
Red	09:01:00	01:05:00	78	Average	0.128369	28891	236828	Copy of Image 4_sh_Maximum intensity projection.ome.tif	GRB_R	shARL13b_1	1.32452	1.87759	VC2614	24h
Blue	00:00:00	07:07:00	74	Average	0.0972076	14868	85022.2	Copy of Image 14_Maximum intensity projection.tif	GRB_B	shARL13b_1	0.782953	0.772577	VC2614	24h
Blue	04:01:00	07:07:00	8	Average	0.110352	23091.7	154479	Copy of Image 16_Maximum intensity projection.tif	GRB_B	shARL13b_1	1.21601	1.40372	VC2614	24h
Blue	04:02:00	06:00:00	26	Average	0.114418	13817.8	92013.3	Copy of Image 40_Maximum intensity projection.tif	GRB_B	shARL13b_1	0.727648	0.836104	VC2614	24h
Blue	02:00:00	04:09:00	18	Average	0.104544	14334.1	90680.3	Copy of Image 22_Maximum intensity projection.tif	GRB_B	shARL13b_1	0.754836	0.823991	VC2614	24h
Blue	04:05:00	07:09:00	77	Average	0.104544	13209.5	81581.3	Copy of Image 42_Maximum intensity projection.tif	GRB_B	shARL13b_1	0.695618	0.741311	VC2614	24h
Blue	06:05:00	08:05:00	69	Average	0.1089	14214.2	91341.6	Copy of Image 44_Maximum intensity projection.tif	GRB_B	shARL13b_1	0.748521	0.83	VC2614	24h
Blue	09:01:00	01:06:00	28	Average	0.128369	18852	173608	Copy of Image 4_sh_Maximum intensity projection.ome.tif	GRB_B	shARL13b_1	0.99275	1.57754	VC2614	24h
Red	00:02:00	03:06:00	27	Average	0.111804	19623.2	126181	Copy of Image 12_Maximum intensity projection.tif	GRB_R	CTL	0.865252	0.834396	VC2666	24h
Red	08:00:00	03:00:00	11	Average	0.105844	25086.4	158957	Copy of Image 16_Maximum intensity projection.tif	GRB_R	CTL	1.10615	1.05113	VC2666	24h
Red	00:04:00	09:08:00	62	Average	0.118096	23327.8	168535	Copy of Image 6_Maximum intensity projection.tif	GRB_R	CTL	1.0286	1.11447	VC2666	24h
Blue	00:02:00	03:07:00	77	Average	0.111804	14147.2	104197	Copy of Image 12_Maximum intensity projection.tif	GRB_B	CTL	0.888938	0.952043	VC2666	24h
Blue	08:00:00	03:01:00	61	Average	0.105844	16304.1	102367	Copy of Image 16_Maximum intensity projection.tif	GRB_B	CTL	1.02446	0.935324	VC2666	24h
Blue	00:05:00	00:00:00	12	Average	0.118096	17293	121773	Copy of Image 6_Maximum intensity projection.tif	GRB_B	CTL	1.0866	1.11263	VC2666	24h
Red	06:02:00	05:06:00	11	Average	0.099792	19868.6	115705	Copy of Image 10_Maximum intensity projection.tif	GRB_R	shARL13b_1	0.876076	0.765121	VC2666	24h
Red	05:01:00	04:00:00	92	Average	0.16335	26851.6	279979	Copy of Image 14_Maximum intensity projection.tif	GRB_R	shARL13b_1	1.18398	1.85142	VC2666	24h
Red	04:01:00	03:02:00	50	Average	0.128357	21725.1	185698	Copy of Image 8_Maximum intensity projection.tif	GRB_R	shARL13b_1	0.957933	1.22796	VC2666	24h
Blue	06:02:00	05:07:00	21	Average	0.099792	15966.5	95646.5	Copy of Image 10_Maximum intensity projection.tif	GRB_B	shARL13b_1	1.00325	0.873915	VC2666	24h
Blue	05:01:00	04:02:00	29	Average	0.16335	17155.9	179619	Copy of Image 14_Maximum intensity projection.tif	GRB_B	shARL13b_1	1.07799	1.64116	VC2666	24h
Blue	04:01:00	03:04:00	30	Average	0.128357	24005.5	191623	Copy of Image 8_Maximum intensity projection.tif	GRB_B	shARL13b_1	1.50838	1.75084	VC2666	24h

## Sheet: Figure_2C_48h
Image.Name	Hour	Minute	Sec	Summary.Statistic	Area	Average.intensity	Total.intensity	Image	Overlay	Treatment	NormAvgAVG	NormAvgTOT	Dissociation	SLIDE	Time
Red	1 day, 16:00:00	1 day, 21:00:00	455	Average	0.0823824	10101	123745	10.tif	GRB_R	CTL	1.06198	1.23522	VC2866	s5	48h
Red	1 day, 18:00:00	1 day, 14:00:00	520	Average	0.0645187	9319.64	83989.3	7.tif	GRB_R	CTL	0.979833	0.838375	VC2866	s3	48h
Red	1 day, 20:00:00	1 day, 23:00:00	860	Average	0.0641155	8132.94	72341.5	8.tif	GRB_R	CTL	0.855069	0.722107	VC2866	s3	48h
Red	2 days, 5:00:00	1 day, 0:00:00	56	Average	0.0822614	10492.2	120648	9.tif	GRB_R	CTL	1.10312	1.2043	VC2866	s4	48h
Blue	1 day, 16:00:00	1 day, 21:00:00	585	Average	0.0823824	12642.4	147912	10.tif	GRB_B	CTL	0.974567	1.06634	VC2866	s5	48h
Blue	1 day, 18:00:00	1 day, 14:00:00	930	Average	0.0645187	10381.2	96107.8	7.tif	GRB_B	CTL	0.80026	0.69287	VC2866	s3	48h
Blue	1 day, 20:00:00	2 days, 0:00:00	261	Average	0.0641155	16050.2	155548	8.tif	GRB_B	CTL	1.23727	1.1214	VC2866	s3	48h
Blue	2 days, 5:00:00	1 day, 0:00:00	403	Average	0.0822614	12815.4	155271	9.tif	GRB_B	CTL	0.987906	1.1194	VC2866	s4	48h
Red	2 days, 8:00:00	1 day, 15:00:00	721	Average	0.0812936	9641.71	115873	11.tif	GRB_R	shIFT88_CEP164	1.01369	1.15664	VC2866	s6	48h
Red	2 days, 9:00:00	1 day, 5:00:00	214	Average	0.0967781	10947.4	154132	12.tif	GRB_R	shIFT88_CEP164	1.15097	1.53854	VC2866	s6	48h
Red	2 days, 10:00:00	2 days, 4:00:00	544	Average	0.0836728	10079.5	126209	13.tif	GRB_R	shIFT88_CEP164	1.05973	1.25981	VC2866	s7	48h
Red	01:00:00	1 day, 13:00:00	383	Average	0.0758336	9661.51	103602	15.tif	GRB_R	shIFT88_CEP164	1.01578	1.03415	VC2866	s8	48h
Red	03:00:00	1 day, 14:00:00	868	Average	0.110431	12011.1	189048	16.tif	GRB_R	shIFT88_CEP164	1.2628	1.88706	VC2866	s8	48h
Blue	2 days, 8:00:00	1 day, 15:00:00	901	Average	0.0812936	11723	135275	11.tif	GRB_B	shIFT88_CEP164	0.903698	0.975235	VC2866	s6	48h
Blue	2 days, 9:00:00	1 day, 5:00:00	334	Average	0.0967781	11047.8	156458	12.tif	GRB_B	shIFT88_CEP164	0.851643	1.12795	VC2866	s6	48h
Blue	2 days, 10:00:00	2 days, 4:00:00	744	Average	0.0836728	9314.19	113576	13.tif	GRB_B	shIFT88_CEP164	0.718007	0.818805	VC2866	s7	48h
Blue	01:00:00	1 day, 13:00:00	713	Average	0.0758336	11518.6	123104	15.tif	GRB_B	shIFT88_CEP164	0.887935	0.887491	VC2866	s8	48h
Blue	03:00:00	1 day, 15:00:00	258	Average	0.110431	13598.4	213125	16.tif	GRB_B	shIFT88_CEP164	1.04827	1.53648	VC2866	s8	48h
Red	04:00:00	2 days, 6:00:00	234	Average	0.117343	13090	229990	17.tif	GRB_R	shARL13b_2	1.37623	2.29575	VC2866	s9	48h
Red	07:00:00	05:00:00	231	Average	0.0811617	10239	115632	19.tif	GRB_R	shARL13b_2	1.07649	1.15423	VC2866	s10	48h
Red	08:00:00	1 day, 17:00:00	162	Average	0.0832292	9242.93	110563	2.tif	GRB_R	shARL13b_2	0.971768	1.10363	VC2866	s1	48h
Red	09:00:00	1 day, 5:00:00	569	Average	0.101617	10830.3	161132	4.tif	GRB_R	shARL13b_2	1.13866	1.60841	VC2866	s2	48h
Red	10:00:00	21:00:00	385	Average	0.0759336	10323.4	116513	5.tif	GRB_R	shARL13b_2	1.08536	1.16303	VC2866	s2	48h
Blue	04:00:00	2 days, 6:00:00	584	Average	0.117343	12686	224015	17.tif	GRB_B	shARL13b_2	0.977928	1.61499	VC2866	s9	48h
Blue	07:00:00	05:00:00	552	Average	0.0811617	11522.1	125303	19.tif	GRB_B	shARL13b_2	0.888206	0.903346	VC2866	s10	48h
Blue	08:00:00	1 day, 17:00:00	502	Average	0.0832292	9316.03	110954	2.tif	GRB_B	shARL13b_2	0.718149	0.799899	VC2866	s1	48h
Blue	09:00:00	1 day, 5:00:00	869	Average	0.101617	11959	180128	4.tif	GRB_B	shARL13b_2	0.921888	1.29859	VC2866	s2	48h
Blue	10:00:00	21:00:00	755	Average	0.0759336	10017.7	124850	5.tif	GRB_B	shARL13b_2	0.772237	0.900084	VC2866	s2	48h
Red	1 day, 12:00:00	06:00:00	220	Average	0.0893815	9270.47	121202	14.tif	GRB_R	CTL	1.19304	1.37185	VC2868	s10_68	48h
Red	1 day, 12:00:00	1 day, 18:00:00	108	Average	0.070769	7769.21	91003.3	15.tif	GRB_R	CTL	0.999838	1.03004	VC2868	s11_68	48h
Red	1 day, 12:00:00	2 days, 9:00:00	558	Average	0.080415	8778.76	100745	16.tif	GRB_R	CTL	1.12976	1.1403	VC2868	s11_68	48h
Red	1 day, 13:00:00	1 day, 9:00:00	777	Average	0.08137	8335.58	100258	17.tif	GRB_R	CTL	1.07273	1.13479	VC2868	s11_68	48h
Red	1 day, 13:00:00	2 days, 6:00:00	468	Average	0.0601407	7617.41	70279.3	7.tif	GRB_R	CTL	0.980303	0.795472	VC2868	s8_68	48h
Red	1 day, 14:00:00	16:00:00	450	Average	0.0508085	6279.2	46965.4	8.tif	GRB_R	CTL	0.808085	0.531589	VC2868	s8_68	48h
Red	1 day, 14:00:00	1 day, 14:00:00	827	Average	0.0983178	6342.65	87992.5	9.tif	GRB_R	CTL	0.816251	0.995962	VC2868	s9_68	48h
Blue	1 day, 12:00:00	06:00:00	350	Average	0.0893815	12330.2	155821	14.tif	GRB_B	CTL	0.96596	1.0464	VC2868	s10_68	48h
Blue	1 day, 12:00:00	1 day, 18:00:00	238	Average	0.070769	12070.1	126483	15.tif	GRB_B	CTL	0.945581	0.84939	VC2868	s10_68	48h
Blue	1 day, 12:00:00	2 days, 9:00:00	705	Average	0.080415	14998	170280	16.tif	GRB_B	CTL	1.17496	1.14351	VC2868	s11_68	48h
Blue	1 day, 13:00:00	1 day, 9:00:00	938	Average	0.08137	11616.5	138519	17.tif	GRB_B	CTL	0.910046	0.930212	VC2868	s11_68	48h
Blue	1 day, 13:00:00	2 days, 6:00:00	598	Average	0.0601407	14841.7	140989	7.tif	GRB_B	CTL	1.16271	0.946801	VC2868	s8_68	48h
Blue	1 day, 14:00:00	16:00:00	580	Average	0.0508085	9136.88	76268.7	8.tif	GRB_B	CTL	0.715792	0.512177	VC2868	s8_68	48h
Blue	1 day, 14:00:00	1 day, 15:00:00	588	Average	0.0983178	14359.6	234015	9.tif	GRB_B	CTL	1.12494	1.57151	VC2868	s9_68	48h
Red	1 day, 15:00:00	09:00:00	970	Average	0.0759336	9140.47	98319.8	18.tif	GRB_R	shIFT88_CEP164	1.17631	1.11285	VC2868	s3_68	48h
Red	1 day, 15:00:00	1 day, 9:00:00	777	Average	0.0886125	8138.32	103181	19.tif	GRB_R	shIFT88_CEP164	1.04734	1.16787	VC2868	s3_68	48h
Red	1 day, 15:00:00	2 days, 8:00:00	737	Average	0.101617	8810.74	133950	20.tif	GRB_R	shIFT88_CEP164	1.13387	1.51614	VC2868	s3_68	48h
Red	1 day, 16:00:00	1 day, 9:00:00	508	Average	0.0800922	7289.63	86521.3	22.tif	GRB_R	shIFT88_CEP164	0.93812	0.979311	VC2868	s4_68	48h
Red	1 day, 16:00:00	2 days, 3:00:00	986	Average	0.0728524	7592.92	79459.7	24.tif	GRB_R	shIFT88_CEP164	0.97715	0.899382	VC2868	s4_68	48h
Red	1 day, 17:00:00	11:00:00	552	Average	0.061696	7087.53	58876	2.tif	GRB_R	shIFT88_CEP164	0.912111	0.666401	VC2868	s1_68	48h
Red	1 day, 17:00:00	1 day, 3:00:00	25	Average	0.066315	6996.95	64382.3	3.tif	GRB_R	shIFT88_CEP164	0.900454	0.728725	VC2868	s1_68	48h
Red	1 day, 17:00:00	2 days, 2:00:00	271	Average	0.0618689	7515.9	66602.8	4.tif	GRB_R	shIFT88_CEP164	0.967239	0.753859	VC2868	s2_68	48h
Red	1 day, 18:00:00	09:00:00	238	Average	0.102447	8735.09	130347	5.tif	GRB_R	shIFT88_CEP164	1.12414	1.47536	VC2868	s2_68	48h
Blue	1 day, 15:00:00	10:00:00	198	Average	0.0759336	18066.6	205139	18.tif	GRB_B	shIFT88_CEP164	1.41536	1.3776	VC2868	s3_68	48h
Blue	1 day, 15:00:00	1 day, 10:00:00	25	Average	0.0886125	12662.8	176011	19.tif	GRB_B	shIFT88_CEP164	0.99202	1.18199	VC2868	s3_68	48h
Blue	1 day, 15:00:00	2 days, 9:00:00	7	Average	0.101617	16849.4	261283	20.tif	GRB_B	shIFT88_CEP164	1.32	1.75463	VC2868	s3_68	48h
Blue	1 day, 16:00:00	1 day, 9:00:00	848	Average	0.0800922	9811.75	126461	22.tif	GRB_B	shIFT88_CEP164	0.768663	0.849237	VC2868	s4_68	48h
Blue	1 day, 16:00:00	2 days, 4:00:00	258	Average	0.0728524	13390.8	149863	24.tif	GRB_B	shIFT88_CEP164	1.04905	1.00639	VC2868	s4_68	48h
Blue	1 day, 17:00:00	11:00:00	747	Average	0.061696	14911.9	132829	2.tif	GRB_B	shIFT88_CEP164	1.16821	0.892003	VC2868	s1_68	48h
Blue	1 day, 17:00:00	1 day, 3:00:00	328	Average	0.066315	16823.8	157639	3.tif	GRB_B	shIFT88_CEP164	1.318	1.05861	VC2868	s1_68	48h
Blue	1 day, 17:00:00	2 days, 2:00:00	562	Average	0.0618689	9944.27	97246.3	4.tif	GRB_B	shIFT88_CEP164	0.779045	0.653051	VC2868	s2_68	48h
Blue	1 day, 18:00:00	09:00:00	488	Average	0.102447	11072.3	165167	5.tif	GRB_B	shIFT88_CEP164	0.867412	1.10917	VC2868	s2_68	48h
Red	1 day, 18:00:00	2 days, 3:00:00	138	Average	0.0842906	9053.96	115072	10.tif	GRB_R	shARL13b_2	1.16518	1.30247	VC2868	s5_68	48h
Red	1 day, 19:00:00	08:00:00	778	Average	0.0739445	7960.18	83558.5	11.tif	GRB_R	shARL13b_2	1.02442	0.945775	VC2868	s5_68	48h
Red	1 day, 19:00:00	1 day, 8:00:00	369	Average	0.086531	7307.34	90412.5	12.tif	GRB_R	shARL13b_2	0.940399	1.02335	VC2868	s6_68	48h
Red	1 day, 20:00:00	09:00:00	408	Average	0.0783903	7420.38	81940.6	13.tif	GRB_R	shARL13b_2	0.954946	0.927463	VC2868	s6_68	48h
Red	1 day, 20:00:00	1 day, 3:00:00	128	Average	0.0667769	9672.86	93256.8	25.tif	GRB_R	shARL13b_2	1.24482	1.05555	VC2868	s7_68	48h
Blue	1 day, 18:00:00	2 days, 3:00:00	474	Average	0.0842906	15460.2	199391	10.tif	GRB_B	shARL13b_2	1.21117	1.33899	VC2868	s5_68	48h
Blue	1 day, 19:00:00	09:00:00	66	Average	0.0739445	12296.8	134335	11.tif	GRB_B	shARL13b_2	0.963341	0.902118	VC2868	s5_68	48h
Blue	1 day, 19:00:00	1 day, 8:00:00	610	Average	0.086531	12801.6	167130	12.tif	GRB_B	shARL13b_2	1.00289	1.12235	VC2868	s6_68	48h
Blue	1 day, 20:00:00	09:00:00	687	Average	0.0783903	13083.7	150406	13.tif	GRB_B	shARL13b_2	1.02499	1.01004	VC2868	s6_68	48h
Blue	1 day, 20:00:00	1 day, 3:00:00	388	Average	0.0667769	13766.9	131190	25.tif	GRB_B	shARL13b_2	1.07852	0.881	VC2868	s7_68	48h
Red	2 days, 6:00:00	1 day, 11:00:00	877	Average	0.0725836	17382.4	182481	24.tif	GRB_R	CTL	0.984207	1.07557	VC2869	s3_69	48h
Red	2 days, 8:00:00	1 day, 6:00:00	620	Average	0.0663264	17048.4	163620	25.tif	GRB_R	CTL	0.965297	0.964403	VC2869	s3_69	48h
Red	2 days, 11:00:00	2 days, 6:00:00	514	Average	0.0637123	19188.6	170548	2.tif	GRB_R	CTL	1.08647	1.00524	VC2869	s1_69	48h
Red	04:00:00	2 days, 2:00:00	988	Average	0.0567472	17604	131140	4.tif	GRB_R	CTL	0.996757	0.77296	VC2869	s1_69	48h
Red	06:00:00	23:00:00	864	Average	0.0542799	15882.1	117911	5.tif	GRB_R	CTL	0.899261	0.694987	VC2869	s1_69	48h
Red	08:00:00	2 days, 7:00:00	698	Average	0.0717771	17054.9	174289	7.tif	GRB_R	CTL	0.965666	1.02729	VC2869	s2_69	48h
Red	10:00:00	1 day, 10:00:00	275	Average	0.0965362	20441.5	285367	8.tif	GRB_R	CTL	1.15741	1.682	VC2869	s2_69	48h
Red	13:00:00	09:00:00	94	Average	0.0592766	16688.6	131920	9.tif	GRB_R	CTL	0.944923	0.777556	VC2869	s2_69	48h
Blue	2 days, 6:00:00	1 day, 12:00:00	7	Average	0.0725836	15476.9	166472	24.tif	GRB_B	CTL	1.16941	1.26943	VC2869	s3_69	48h
Blue	2 days, 8:00:00	1 day, 6:00:00	800	Average	0.0663264	10273	104017	25.tif	GRB_B	CTL	0.776213	0.793182	VC2869	s3_69	48h
Blue	2 days, 11:00:00	2 days, 6:00:00	834	Average	0.0637123	10778.4	99540	2.tif	GRB_B	CTL	0.814402	0.759039	VC2869	s1_69	48h
Blue	04:00:00	2 days, 3:00:00	118	Average	0.0567472	14822.1	112041	4.tif	GRB_B	CTL	1.11994	0.854365	VC2869	s1_69	48h
Blue	06:00:00	1 day, 0:00:00	234	Average	0.0542799	19352.3	157751	5.tif	GRB_B	CTL	1.46223	1.20293	VC2869	s1_69	48h
Blue	08:00:00	2 days, 8:00:00	118	Average	0.0717771	10271.1	115636	7.tif	GRB_B	CTL	0.77607	0.88178	VC2869	s2_69	48h
Blue	10:00:00	1 day, 10:00:00	655	Average	0.0965362	14490.5	202058	8.tif	GRB_B	CTL	1.09488	1.54079	VC2869	s2_69	48h
Blue	13:00:00	09:00:00	394	Average	0.0592766	10413.7	91599.4	9.tif	GRB_B	CTL	0.786846	0.698488	VC2869	s2_69	48h
Red	17:00:00	2 days, 10:00:00	435	Average	0.0805018	19545.6	247661	12.tif	GRB_R	shIFT88_CEP164	1.10669	1.45975	VC2869	s4_69	48h
Red	20:00:00	1 day, 1:00:00	65	Average	0.0878701	19367.5	243717	13.tif	GRB_R	shIFT88_CEP164	1.0966	1.43651	VC2869	s4_69	48h
Red	1 day, 1:00:00	20:00:00	537	Average	0.083373	19297.3	242874	16.tif	GRB_R	shIFT88_CEP164	1.09263	1.43154	VC2869	s4_69	48h
Red	1 day, 3:00:00	17:00:00	591	Average	0.0683495	17226	166404	17.tif	GRB_R	shIFT88_CEP164	0.975352	0.980809	VC2869	s4_69	48h
Red	1 day, 4:00:00	2 days, 11:00:00	271	Average	0.0596798	18292.1	158705	18.tif	GRB_R	shIFT88_CEP164	1.03572	0.935435	VC2869	s5_69	48h
Red	1 day, 6:00:00	1 day, 14:00:00	126	Average	0.0962521	20952	323121	19.tif	GRB_R	shIFT88_CEP164	1.18632	1.90453	VC2869	s5_69	48h
Red	1 day, 13:00:00	06:00:00	393	Average	0.089892	15439	201448	22.tif	GRB_R	shIFT88_CEP164	0.874168	1.18737	VC2869	s5_69	48h
Red	1 day, 15:00:00	1 day, 16:00:00	310	Average	0.0666061	14817.7	136703	23.tif	GRB_R	shIFT88_CEP164	0.838991	0.805752	VC2869	s5_69	48h
Red	1 day, 17:00:00	15:00:00	304	Average	0.0940431	18225.1	259958	27.tif	GRB_R	shIFT88_CEP164	1.03192	1.53224	VC2869	s6_69	48h
Red	1 day, 22:00:00	15:00:00	319	Average	0.101099	16281.2	244421	20_again.tif	GRB_R	shIFT88_CEP164	0.921857	1.44065	VC2869	s5_69	48h
Blue	17:00:00	2 days, 10:00:00	835	Average	0.0805018	16834.2	211152	12.tif	GRB_B	shIFT88_CEP164	1.27197	1.61013	VC2869	s4_69	48h
Blue	20:00:00	1 day, 1:00:00	195	Average	0.0878701	15477.3	196371	13.tif	GRB_B	shIFT88_CEP164	1.16944	1.49742	VC2869	s4_69	48h
Blue	1 day, 1:00:00	20:00:00	902	Average	0.083373	14519.6	182103	16.tif	GRB_B	shIFT88_CEP164	1.09708	1.38862	VC2869	s4_69	48h
Blue	1 day, 3:00:00	17:00:00	882	Average	0.0683495	25244.4	239432	17.tif	GRB_B	shIFT88_CEP164	1.90743	1.82578	VC2869	s4_69	48h
Blue	1 day, 4:00:00	2 days, 11:00:00	631	Average	0.0596798	16090	145438	18.tif	GRB_B	shIFT88_CEP164	1.21574	1.10903	VC2869	s5_69	48h
Blue	1 day, 6:00:00	1 day, 14:00:00	396	Average	0.0962521	14629	221561	19.tif	GRB_B	shIFT88_CEP164	1.10535	1.68951	VC2869	s5_69	48h
Blue	1 day, 13:00:00	06:00:00	764	Average	0.089892	12160.7	151593	22.tif	GRB_B	shIFT88_CEP164	0.918843	1.15597	VC2869	s5_69	48h
Blue	1 day, 15:00:00	1 day, 16:00:00	720	Average	0.0666061	12111.1	109887	23.tif	GRB_B	shIFT88_CEP164	0.915097	0.837942	VC2869	s5_69	48h
Blue	1 day, 17:00:00	15:00:00	654	Average	0.0940431	18404.2	276249	27.tif	GRB_B	shIFT88_CEP164	1.3906	2.10653	VC2869	s6_69	48h
Blue	1 day, 22:00:00	15:00:00	559	Average	0.101099	11739.9	176928	20_again.tif	GRB_B	shIFT88_CEP164	0.887049	1.34916	VC2869	s5_69	48h
Red	04:00:00	19:00:00	381	Average	0.0874823	14300.1	180001	12.tif	GRB_R	CTL	1.10182	1.29253	VC2870	s2_70	48h
Red	06:00:00	2 days, 3:00:00	341	Average	0.0714669	14606.5	147459	14.tif	GRB_R	CTL	1.12543	1.05885	VC2870	s2_70	48h
Red	09:00:00	06:00:00	899	Average	0.0750786	11252	116887	15.tif	GRB_R	CTL	0.86696	0.839329	VC2870	s2_70	48h
Red	11:00:00	2 days, 5:00:00	71	Average	0.0772802	11469.5	122886	1.tif	GRB_R	CTL	0.883722	0.882408	VC2870	s1_70	48h
Red	15:00:00	2 days, 5:00:00	394	Average	0.0626369	13180.9	117409	21.tif	GRB_R	CTL	1.01558	0.843073	VC2870	s3_70	48h
Red	1 day, 2:00:00	16:00:00	163	Average	0.0842776	14357.3	170581	3.tif	GRB_R	CTL	1.10623	1.22489	VC2870	s1_70	48h
Red	1 day, 6:00:00	19:00:00	750	Average	0.0755723	11684.2	119616	4.tif	GRB_R	CTL	0.900263	0.858925	VC2870	s1_70	48h
Blue	04:00:00	19:00:00	712	Average	0.0874823	20416.8	259522	12.tif	GRB_B	CTL	1.23463	1.39052	VC2870	s2_70	48h
Blue	06:00:00	2 days, 3:00:00	651	Average	0.0714669	20083.6	208010	14.tif	GRB_B	CTL	1.21448	1.11452	VC2870	s2_70	48h
Blue	09:00:00	07:00:00	199	Average	0.0750786	13005.5	143348	15.tif	GRB_B	CTL	0.786461	0.768063	VC2870	s2_70	48h
Blue	11:00:00	2 days, 5:00:00	321	Average	0.0772802	17183.7	192198	1.tif	GRB_B	CTL	1.03912	1.0298	VC2870	s1_70	48h
Blue	15:00:00	2 days, 5:00:00	704	Average	0.0626369	13521.8	130470	21.tif	GRB_B	CTL	0.817681	0.699062	VC2870	s3_70	48h
Blue	1 day, 2:00:00	16:00:00	443	Average	0.0842776	14874.7	188911	3.tif	GRB_B	CTL	0.899495	1.01219	VC2870	s1_70	48h
Blue	1 day, 6:00:00	20:00:00	20	Average	0.0755723	16671.3	183995	4.tif	GRB_B	CTL	1.00813	0.985847	VC2870	s1_70	48h
Red	1 day, 9:00:00	09:00:00	469	Average	0.092907	17656.6	222412	10.tif	GRB_R	shIFT88_CEP164	1.36043	1.59707	VC2870	s4_70	48h
Red	1 day, 12:00:00	09:00:00	769	Average	0.083192	13152.8	153703	17.tif	GRB_R	shIFT88_CEP164	1.01342	1.10369	VC2870	s5_70	48h
Red	1 day, 13:00:00	2 days, 11:00:00	384	Average	0.0725836	13268.3	137080	18.tif	GRB_R	shIFT88_CEP164	1.02232	0.984324	VC2870	s6_70	48h
Red	1 day, 17:00:00	1 day, 16:00:00	643	Average	0.0862938	13676.5	174302	20.tif	GRB_R	shIFT88_CEP164	1.05377	1.25161	VC2870	s6_70	48h
Red	1 day, 20:00:00	1 day, 0:00:00	823	Average	0.0758095	12042.2	124728	28.tif	GRB_R	shIFT88_CEP164	0.927846	0.895634	VC2870	s7_70	48h
Red	1 day, 22:00:00	00:00:00	759	Average	0.089026	14074.2	181693	29.tif	GRB_R	shIFT88_CEP164	1.08441	1.30468	VC2870	s7_70	48h
Red	2 days, 2:00:00	06:00:00	493	Average	0.0809042	14761.8	178709	31.tif	GRB_R	shIFT88_CEP164	1.13739	1.28325	VC2870	s7_70	48h
Red	2 days, 7:00:00	23:00:00	786	Average	0.0866164	13058.7	157135	8.tif	GRB_R	shIFT88_CEP164	1.00617	1.12833	VC2870	s4_70	48h
Blue	1 day, 9:00:00	09:00:00	769	Average	0.092907	12692.6	172484	10.tif	GRB_B	shIFT88_CEP164	0.767537	0.924171	VC2870	s4_70	48h
Blue	1 day, 12:00:00	10:00:00	169	Average	0.083192	13859.2	158643	17.tif	GRB_B	shIFT88_CEP164	0.838085	0.85001	VC2870	s5_70	48h
Blue	1 day, 13:00:00	2 days, 11:00:00	674	Average	0.0725836	14200.4	138478	18.tif	GRB_B	shIFT88_CEP164	0.858718	0.741966	VC2870	s6_70	48h
Blue	1 day, 17:00:00	1 day, 17:00:00	23	Average	0.0862938	12007.5	151611	20.tif	GRB_B	shIFT88_CEP164	0.726111	0.812334	VC2870	s6_70	48h
Blue	1 day, 20:00:00	1 day, 1:00:00	103	Average	0.0758095	17940.4	225373	28.tif	GRB_B	shIFT88_CEP164	1.08488	1.20755	VC2870	s7_70	48h
Blue	1 day, 22:00:00	01:00:00	119	Average	0.089026	13872.9	182737	29.tif	GRB_B	shIFT88_CEP164	0.838913	0.979108	VC2870	s7_70	48h
Blue	2 days, 2:00:00	06:00:00	753	Average	0.0809042	15546.9	183479	31.tif	GRB_B	shIFT88_CEP164	0.940141	0.983084	VC2870	s7_70	48h
Blue	2 days, 7:00:00	1 day, 0:00:00	76	Average	0.0866164	16140.8	204621	8.tif	GRB_B	shIFT88_CEP164	0.976055	1.09636	VC2870	s4_70	48h
Red	08:00:00	2 days, 5:00:00	66	Average	0.0974694	14585.5	209841	24.tif	GRB_R	shARL13b_2	1.12381	1.5068	VC2870	s9_70	48h
Red	11:00:00	21:00:00	479	Average	0.0852392	14117.6	175236	25.tif	GRB_R	shARL13b_2	1.08776	1.25832	VC2870	s9_70	48h
Red	13:00:00	1 day, 8:00:00	900	Average	0.08842	15725.2	220495	26.tif	GRB_R	shARL13b_2	1.21162	1.5833	VC2870	s9_70	48h
Red	16:00:00	11:00:00	73	Average	0.0853646	14139.4	173452	33.tif	GRB_R	shARL13b_2	1.08944	1.2455	VC2870	s10_70	48h
Red	19:00:00	22:00:00	28	Average	0.0807492	13998.4	160003	34.tif	GRB_R	shARL13b_2	1.07857	1.14893	VC2870	s10_70	48h
Red	1 day, 2:00:00	1 day, 0:00:00	332	Average	0.102827	11372.5	173353	7.tif	GRB_R	shARL13b_2	0.87625	1.24479	VC2870	s8_70	48h
Blue	08:00:00	2 days, 5:00:00	436	Average	0.0974694	13485.8	196397	24.tif	GRB_B	shARL13b_2	0.815506	1.0523	VC2870	s9_70	48h
Blue	11:00:00	21:00:00	910	Average	0.0852392	11163.2	130878	25.tif	GRB_B	shARL13b_2	0.675051	0.701246	VC2870	s9_70	48h
Blue	13:00:00	1 day, 9:00:00	200	Average	0.08842	15589	216253	26.tif	GRB_B	shARL13b_2	0.942687	1.15869	VC2870	s9_70	48h
Blue	16:00:00	11:00:00	423	Average	0.0853646	10648	134653	33.tif	GRB_B	shARL13b_2	0.643901	0.721472	VC2870	s10_70	48h
Blue	19:00:00	22:00:00	419	Average	0.0807492	18807.2	229938	34.tif	GRB_B	shARL13b_2	1.13729	1.23201	VC2870	s10_70	48h
Blue	1 day, 2:00:00	1 day, 0:00:00	735	Average	0.102827	18443.8	266114	7.tif	GRB_B	shARL13b_2	1.11532	1.42584	VC2870	s8_70	48h
Red	04:00:00	1 day, 16:00:00	10	Average	0.0849833	10670.5	126057	Copy of Image 40_Maximum intensity projection.tif	GRB_R	CTL	0.949511	1.03494	VC2872	s_1	48h
Red	07:00:00	1 day, 12:00:00	413	Average	0.091165	12698.9	172808	Copy of Image 41_Maximum intensity projection.tif	GRB_R	CTL	1.13	1.41877	VC2872	s_1	48h
Red	10:00:00	06:00:00	853	Average	0.0854253	11657.9	148952	Copy of Image 42_Maximum intensity projection.tif	GRB_R	CTL	1.03738	1.22291	VC2872	s_1	48h
Red	12:00:00	1 day, 13:00:00	520	Average	0.0588733	9087.9	74080.1	Copy of Image 43_Maximum intensity projection.tif	GRB_R	CTL	0.808683	0.608204	VC2872	s_1	48h
Red	14:00:00	19:00:00	950	Average	0.0549561	11324.4	85610.6	Copy of Image 44_Maximum intensity projection.tif	GRB_R	CTL	1.0077	0.702871	VC2872	s_1	48h
Red	17:00:00	06:00:00	513	Average	0.0659301	11987.8	123300	Copy of Image 45_Maximum intensity projection.tif	GRB_R	CTL	1.06673	1.01231	VC2872	s_1	48h
Blue	04:00:00	1 day, 16:00:00	402	Average	0.0849833	14231.7	173922	Copy of Image 40_Maximum intensity projection.tif	GRB_B	CTL	0.998895	1.0525	VC2872	s_1	48h
Blue	07:00:00	1 day, 12:00:00	707	Average	0.091165	15719.1	219988	Copy of Image 41_Maximum intensity projection.tif	GRB_B	CTL	1.1033	1.33127	VC2872	s_1	48h
Blue	10:00:00	07:00:00	236	Average	0.0854253	15626.9	203861	Copy of Image 42_Maximum intensity projection.tif	GRB_B	CTL	1.09683	1.23368	VC2872	s_1	48h
Blue	12:00:00	1 day, 13:00:00	884	Average	0.0588733	12155.7	109080	Copy of Image 43_Maximum intensity projection.tif	GRB_B	CTL	0.853188	0.660106	VC2872	s_1	48h
Blue	14:00:00	20:00:00	280	Average	0.0549561	10326.7	78121.3	Copy of Image 44_Maximum intensity projection.tif	GRB_B	CTL	0.724815	0.472756	VC2872	s_1	48h
Blue	17:00:00	06:00:00	863	Average	0.0659301	17424.3	206506	Copy of Image 45_Maximum intensity projection.tif	GRB_B	CTL	1.22298	1.24969	VC2872	s_1	48h
Red	1 day, 7:00:00	15:00:00	434	Average	0.0671984	13703.5	126005	Copy of Image 25_Maximum intensity projection.tif	GRB_R	shIFT88_CEP164	1.2194	1.03451	VC2872	s_2	48h
Red	1 day, 10:00:00	2 days, 10:00:00	921	Average	0.0967781	14642.8	198094	Copy of Image 26_Maximum intensity projection.tif	GRB_R	shIFT88_CEP164	1.30299	1.62637	VC2872	s_2	48h
Red	1 day, 12:00:00	2 days, 9:00:00	206	Average	0.0887133	13171.8	157848	Copy of Image 27_Maximum intensity projection.tif	GRB_R	shIFT88_CEP164	1.17208	1.29595	VC2872	s_2	48h
Red	1 day, 14:00:00	2 days, 8:00:00	725	Average	0.0985549	14624.7	219147	Copy of Image 28_Maximum intensity projection.tif	GRB_R	shIFT88_CEP164	1.30137	1.79922	VC2872	s_2	48h
Red	1 day, 21:00:00	06:00:00	896	Average	0.0689544	12025.3	118497	Copy of Image 29_Maximum intensity projection.tif	GRB_R	shIFT88_CEP164	1.07007	0.972873	VC2872	s_2	48h
Red	2 days, 2:00:00	01:00:00	135	Average	0.0950845	16195.7	220917	Copy of Image 31_Maximum intensity projection.tif	GRB_R	shIFT88_CEP164	1.44117	1.81375	VC2872	s_2	48h
Red	2 days, 5:00:00	16:00:00	596	Average	0.0826336	11699.7	134278	Copy of Image 35_Maximum intensity projection.tif	GRB_R	shIFT88_CEP164	1.04109	1.10243	VC2872	s_3	48h
Blue	1 day, 7:00:00	15:00:00	796	Average	0.0671984	13385.4	131735	Copy of Image 25_Maximum intensity projection.tif	GRB_B	shIFT88_CEP164	0.939499	0.797205	VC2872	s_2	48h
Blue	1 day, 10:00:00	2 days, 11:00:00	295	Average	0.0967781	14232.4	199289	Copy of Image 26_Maximum intensity projection.tif	GRB_B	shIFT88_CEP164	0.998943	1.20601	VC2872	s_2	48h
Blue	1 day, 12:00:00	2 days, 9:00:00	593	Average	0.0887133	21807.5	275689	Copy of Image 27_Maximum intensity projection.tif	GRB_B	shIFT88_CEP164	1.53063	1.66835	VC2872	s_2	48h
Blue	1 day, 14:00:00	2 days, 9:00:00	85	Average	0.0985549	12708.5	203408	Copy of Image 28_Maximum intensity projection.tif	GRB_B	shIFT88_CEP164	0.89199	1.23093	VC2872	s_2	48h
Blue	1 day, 21:00:00	07:00:00	233	Average	0.0689544	18631.6	204988	Copy of Image 29_Maximum intensity projection.tif	GRB_B	shIFT88_CEP164	1.30772	1.2405	VC2872	s_2	48h
Blue	2 days, 2:00:00	01:00:00	548	Average	0.0950845	13167	195448	Copy of Image 31_Maximum intensity projection.tif	GRB_B	shIFT88_CEP164	0.924168	1.18276	VC2872	s_2	48h
Blue	2 days, 5:00:00	16:00:00	984	Average	0.0826336	14790.4	174248	Copy of Image 35_Maximum intensity projection.tif	GRB_B	shIFT88_CEP164	1.03811	1.05448	VC2872	s_3	48h
Red	05:00:00	2 days, 6:00:00	20	Average	0.0872581	13710.2	177363	Copy of Image 37_Maximum intensity projection.tif	GRB_R	shARL13b_2	1.22	1.45616	VC2872	s_4	48h
Red	08:00:00	11:00:00	574	Average	0.0908395	13553.3	180848	Copy of Image 38_Maximum intensity projection.tif	GRB_R	shARL13b_2	1.20604	1.48478	VC2872	s_4	48h
Red	09:00:00	2 days, 1:00:00	720	Average	0.0807492	13039.9	149961	Copy of Image 39_Maximum intensity projection.tif	GRB_R	shARL13b_2	1.16035	1.23119	VC2872	s_4	48h
Blue	05:00:00	2 days, 6:00:00	376	Average	0.0872581	29974.7	390956	Copy of Image 37_Maximum intensity projection.tif	GRB_B	shARL13b_2	2.10387	2.36589	VC2872	s_4	48h
Blue	08:00:00	11:00:00	924	Average	0.0908395	16981.9	223885	Copy of Image 38_Maximum intensity projection.tif	GRB_B	shARL13b_2	1.19193	1.35485	VC2872	s_4	48h
Blue	09:00:00	2 days, 2:00:00	84	Average	0.0807492	12805.1	154544	Copy of Image 39_Maximum intensity projection.tif	GRB_B	shARL13b_2	0.898763	0.935234	VC2872	s_4	48h

## Sheet: Figure_2D_24h
Count	Image	Treatment	Order_Analysed	Distance	Density	Dissociation	Time
8	Copy of Image 11_Maximum intensity projection.tif	CTL	12	329.774	0.024259	VC2604	24h
6	Copy of Image 23_Maximum intensity projection.tif	CTL	13	160.239	0.037444	VC2604	24h
13	Copy of Image 32_Maximum intensity projection.tif	CTL	15	234.319	0.0554798	VC2604	24h
11	Copy of Image 42_Maximum intensity projection.tif	CTL	16	395.373	0.0278218	VC2604	24h
12	Copy of Image 44_Maximum intensity projection.tif	CTL	17	377.309	0.0318041	VC2604	24h
12	Copy of Image 46_Maximum intensity projection.tif	CTL	18	125.91	0.095306	VC2604	24h
6	Copy of Image 5_Maximum intensity projection.tif	CTL	19	461.853	0.0129911	VC2604	24h
12	Copy of Image 7_Maximum intensity projection.tif	CTL	20	266.187	0.0450811	VC2604	24h
37	Copy of Image 15_Maximum intensity projection.tif	shARL13b_1	2	345.516	0.107086	VC2604	24h
26	Copy of Image 17_Maximum intensity projection.tif	shARL13b_1	3	391.935	0.0663375	VC2604	24h
32	Copy of Image 19_Maximum intensity projection.tif	shARL13b_1	4	333.395	0.0959822	VC2604	24h
29	Copy of Image 21_Maximum intensity projection.tif	shARL13b_1	5	354.067	0.0819053	VC2604	24h
20	Copy of Image 37_Maximum intensity projection.tif	shARL13b_1	7	180.961	0.110521	VC2604	24h
13	Copy of Image 40_Maximum intensity projection.tif	shARL13b_1	8	269.955	0.0481562	VC2604	24h
38	Copy of Image 48_Maximum intensity projection.tif	shARL13b_1	9	405.379	0.0937395	VC2604	24h
10	Copy of Image 50_Maximum intensity projection.tif	shARL13b_1	10	237.06	0.0421834	VC2604	24h
12	Copy of Image 54_Maximum intensity projection.tif	shARL13b_1	11	181.504	0.0661143	VC2604	24h
43	Copy of Image 13_Maximum intensity projection.tif	CTL	2	386.613	0.111222	VC2605	24h
51	Copy of Image 19_Maximum intensity projection.tif	CTL	4	480.132	0.106221	VC2605	24h
18	Copy of Image 21_Maximum intensity projection.tif	CTL	5	188.955	0.0952606	VC2605	24h
24	Copy of Image 31_Maximum intensity projection.tif	CTL	6	282.676	0.0849029	VC2605	24h
18	Copy of Image 33_Maximum intensity projection.tif	CTL	7	178.079	0.101079	VC2605	24h
38	Copy of Image 40_Maximum intensity projection.tif	CTL	9	637.452	0.0596123	VC2605	24h
88	Copy of Image 17_Maximum intensity projection.tif	shARL13b_1	12	818.474	0.107517	VC2605	24h
27	Copy of Image 23_Maximum intensity projection.tif	shARL13b_1	14	278.852	0.0968255	VC2605	24h
80	Copy of Image 27_Maximum intensity projection.tif	shARL13b_1	16	504.499	0.158573	VC2605	24h
17	Copy of Image 29_Maximum intensity projection.tif	shARL13b_1	17	314.274	0.054093	VC2605	24h
25	Copy of Image 37.ome_Maximum intensity projection.tif	shARL13b_1	20	126.496	0.197635	VC2605	24h
23	Copy of Image 12_Maximum intensity projection.tif	CTL	2	251.674	0.0913881	VC2614	24h
17	Copy of Image 24_Maximum intensity projection.tif	CTL	3	239.627	0.0709436	VC2614	24h
85	Copy of Image 28_Maximum intensity projection.tif	CTL	4	1239.28	0.0685881	VC2614	24h
47	Copy of Image 30_Maximum intensity projection.tif	CTL	6	356.455	0.131854	VC2614	24h
8	Copy of Image 32_Maximum intensity projection.tif	CTL	7	101.033	0.0791818	VC2614	24h
8	Copy of Image 4_Maximum intensity projection.tif	CTL	9	243.452	0.0328607	VC2614	24h
8	Copy of Image 11_Maximum intensity projection.tif	CTL	11	100.28	0.0797768	VC2614	24h
32	Copy of Image 9_Maximum intensity projection.tif	CTL	13	381.783	0.0838174	VC2614	24h
38	Copy of Image 14_Maximum intensity projection.tif	shARL13b_1	14	460.617	0.0824981	VC2614	24h
18	Copy of Image 16_Maximum intensity projection.tif	shARL13b_1	15	191.292	0.094097	VC2614	24h
30	Copy of Image 40_Maximum intensity projection.tif	shARL13b_1	20	396.332	0.0756941	VC2614	24h
55	Copy of Image 22_Maximum intensity projection.tif	shARL13b_1	23	522.265	0.10531	VC2614	24h
18	Copy of Image 42_Maximum intensity projection.tif	shARL13b_1	24	895.924	0.020091	VC2614	24h
16	Copy of Image 44_Maximum intensity projection.tif	shARL13b_1	25	437.278	0.03659	VC2614	24h
49	Copy of Image 4_sh_Maximum intensity projection.ome.tif	shARL13b_1	26	464.512	0.105487	VC2614	24h
12	Copy of Image 12_Maximum intensity projection.tif	CTL	2	245.856	0.048809	VC2666	24h
67	Copy of Image 16_Maximum intensity projection.tif	CTL	4	712.799	0.0939956	VC2666	24h
36	Copy of Image 6_Maximum intensity projection.tif	CTL	5	458.996	0.0784321	VC2666	24h
22	Copy of Image 10_Maximum intensity projection.tif	shARL13b_1	1	319.99	0.0687521	VC2666	24h
8	Copy of Image 14_Maximum intensity projection.tif	shARL13b_1	3	117.871	0.067871	VC2666	24h
30	Copy of Image 8_Maximum intensity projection.tif	shARL13b_1	6	583.578	0.051407	VC2666	24h

## Sheet: Figure_2D_48h
Count	Image	Treatment	Order_Analysed	Distance	Density	Dissociation	SLIDE	Time
20	10.tif	CTL	1	354.114	0.056479	VC2866	s5	48h
9	7.tif	CTL	2	219.967	0.0409152	VC2866	s3	48h
30	8.tif	CTL	3	394.539	0.0760382	VC2866	s3	48h
42	9.tif	CTL	4	264.494	0.158794	VC2866	s4	48h
10	11.tif	shIFT88_CEP164	5	142.463	0.0701938	VC2866	s6	48h
21	12.tif	shIFT88_CEP164	6	350.358	0.0599387	VC2866	s6	48h
36	13.tif	shIFT88_CEP164	7	244.066	0.147501	VC2866	s7	48h
67	15.tif	shIFT88_CEP164	9	540.884	0.123871	VC2866	s8	48h
28	16.tif	shIFT88_CEP164	10	673.039	0.0416023	VC2866	s8	48h
18	17.tif	shARL13b_2	11	76.7701	0.234466	VC2866	s9	48h
44	19.tif	shARL13b_2	13	316.339	0.139091	VC2866	s10	48h
15	2.tif	shARL13b_2	14	220.861	0.0679159	VC2866	s1	48h
6	4.tif	shARL13b_2	15	153.244	0.0391534	VC2866	s2	48h
13	5.tif	shARL13b_2	16	263.454	0.0493445	VC2866	s2	48h
70	14.tif	CTL	1	859.883	0.0814064	VC2868	s10_68	48h
12	15.tif	CTL	2	221.285	0.0542288	VC2868	s11_68	48h
38	16.tif	CTL	3	324.75	0.117013	VC2868	s11_68	48h
19	17.tif	CTL	4	394.66	0.0481427	VC2868	s11_68	48h
7	7.tif	CTL	5	156.233	0.0448049	VC2868	s8_68	48h
18	8.tif	CTL	6	187.598	0.09595	VC2868	s8_68	48h
11	9.tif	CTL	7	318.151	0.0345748	VC2868	s9_68	48h
13	18.tif	shIFT88_CEP164	8	112.987	0.115057	VC2868	s3_68	48h
72	19.tif	shIFT88_CEP164	9	799.258	0.0900836	VC2868	s3_68	48h
19	20.tif	shIFT88_CEP164	10	133.502	0.14232	VC2868	s3_68	48h
29	22.tif	shIFT88_CEP164	11	230.117	0.126023	VC2868	s4_68	48h
27	24.tif	shIFT88_CEP164	12	204.824	0.13182	VC2868	s4_68	48h
8	2.tif	shIFT88_CEP164	13	87.2413	0.0916997	VC2868	s1_68	48h
44	3.tif	shIFT88_CEP164	14	774.568	0.0568059	VC2868	s1_68	48h
21	4.tif	shIFT88_CEP164	15	492.658	0.0426259	VC2868	s2_68	48h
35	5.tif	shIFT88_CEP164	16	440.676	0.0794234	VC2868	s2_68	48h
31	10.tif	shARL13b_2	17	274.048	0.113119	VC2868	s5_68	48h
16	11.tif	shARL13b_2	18	160.779	0.0995152	VC2868	s5_68	48h
51	12.tif	shARL13b_2	19	512.099	0.0995901	VC2868	s6_68	48h
40	13.tif	shARL13b_2	20	301.739	0.132565	VC2868	s6_68	48h
15	25.tif	shARL13b_2	21	223.612	0.0670804	VC2868	s7_68	48h
13	24.tif	CTL	1	267.231	0.048647	VC2869	s3_69	48h
29	25.tif	CTL	2	189.034	0.153412	VC2869	s3_69	48h
9	2.tif	CTL	4	205.573	0.04378	VC2869	s1_69	48h
11	4.tif	CTL	6	158.521	0.0693913	VC2869	s1_69	48h
23	5.tif	CTL	7	303.075	0.0758887	VC2869	s1_69	48h
9	7.tif	CTL	8	97.3103	0.0924876	VC2869	s2_69	48h
10	8.tif	CTL	9	134.976	0.0740875	VC2869	s2_69	48h
18	9.tif	CTL	10	534.963	0.0336472	VC2869	s2_69	48h
22	12.tif	shIFT88_CEP164	12	244.366	0.0900288	VC2869	s4_69	48h
66	13.tif	shIFT88_CEP164	13	628.154	0.10507	VC2869	s4_69	48h
37	16.tif	shIFT88_CEP164	15	294.952	0.125444	VC2869	s4_69	48h
12	17.tif	shIFT88_CEP164	16	77.1258	0.15559	VC2869	s4_69	48h
18	18.tif	shIFT88_CEP164	17	134.546	0.133783	VC2869	s5_69	48h
23	19.tif	shIFT88_CEP164	18	334.286	0.0688033	VC2869	s5_69	48h
13	22.tif	shIFT88_CEP164	21	196.828	0.0660476	VC2869	s5_69	48h
17	23.tif	shIFT88_CEP164	22	252.345	0.0673681	VC2869	s5_69	48h
46	27.tif	shIFT88_CEP164	23	241.684	0.190331	VC2869	s6_69	48h
14	20_again.tif	shIFT88_CEP164	26	183.143	0.0764428	VC2869	s5_69	48h
19	12.tif	CTL	1	335.837	0.056575	VC2870	s2_70	48h
13	14.tif	CTL	2	177.62	0.07319	VC2870	s2_70	48h
32	15.tif	CTL	3	306.396	0.10444	VC2870	s2_70	48h
17	1.tif	CTL	4	484.153	0.0351129	VC2870	s1_70	48h
27	21.tif	CTL	5	257.968	0.104664	VC2870	s3_70	48h
36	3.tif	CTL	8	587.94	0.0612307	VC2870	s1_70	48h
17	4.tif	CTL	9	194.129	0.0875708	VC2870	s1_70	48h
10	10.tif	shIFT88_CEP164	10	142.985	0.0699374	VC2870	s4_70	48h
13	17.tif	shIFT88_CEP164	11	202.5	0.0641976	VC2870	s5_70	48h
31	18.tif	shIFT88_CEP164	12	525.916	0.0589448	VC2870	s6_70	48h
18	20.tif	shIFT88_CEP164	13	248.812	0.0723439	VC2870	s6_70	48h
9	28.tif	shIFT88_CEP164	14	208.201	0.0432275	VC2870	s7_70	48h
49	29.tif	shIFT88_CEP164	15	582.831	0.0840724	VC2870	s7_70	48h
82	31.tif	shIFT88_CEP164	16	781.524	0.104923	VC2870	s7_70	48h
30	8.tif	shIFT88_CEP164	17	516.808	0.0580486	VC2870	s4_70	48h
28	24.tif	shARL13b_2	19	252.138	0.11105	VC2870	s9_70	48h
39	25.tif	shARL13b_2	20	256.953	0.151779	VC2870	s9_70	48h
33	26.tif	shARL13b_2	21	482.712	0.0683637	VC2870	s9_70	48h
46	33.tif	shARL13b_2	22	399.626	0.115108	VC2870	s10_70	48h
16	34.tif	shARL13b_2	23	222.355	0.0719569	VC2870	s10_70	48h
24	7.tif	shARL13b_2	26	213.316	0.112509	VC2870	s8_70	48h
24	Copy of Image 40_Maximum intensity projection.tif	CTL	4	345.698	0.0694248	VC2872	s_1	48h
25	Copy of Image 41_Maximum intensity projection.tif	CTL	5	437.237	0.0571772	VC2872	s_1	48h
13	Copy of Image 42_Maximum intensity projection.tif	CTL	6	195.387	0.0665347	VC2872	s_1	48h
9	Copy of Image 43_Maximum intensity projection.tif	CTL	7	114.009	0.0789408	VC2872	s_1	48h
14	Copy of Image 44_Maximum intensity projection.tif	CTL	8	420.611	0.0332849	VC2872	s_1	48h
12	Copy of Image 45_Maximum intensity projection.tif	CTL	9	120.638	0.099471	VC2872	s_1	48h
31	Copy of Image 25_Maximum intensity projection.tif	shIFT88_CEP164	16	273.038	0.113537	VC2872	s_2	48h
21	Copy of Image 26_Maximum intensity projection.tif	shIFT88_CEP164	17	146.795	0.143057	VC2872	s_2	48h
27	Copy of Image 27_Maximum intensity projection.tif	shIFT88_CEP164	18	208.975	0.129202	VC2872	s_2	48h
64	Copy of Image 28_Maximum intensity projection.tif	shIFT88_CEP164	19	836.036	0.0765518	VC2872	s_2	48h
16	Copy of Image 29_Maximum intensity projection.tif	shIFT88_CEP164	20	154.4	0.103627	VC2872	s_2	48h
10	Copy of Image 31_Maximum intensity projection.tif	shIFT88_CEP164	22	130.642	0.0765449	VC2872	s_2	48h
26	Copy of Image 35_Maximum intensity projection.tif	shIFT88_CEP164	24	345.693	0.0752113	VC2872	s_3	48h
46	Copy of Image 37_Maximum intensity projection.tif	shARL13b_2	29	256.945	0.179027	VC2872	s_4	48h
33	Copy of Image 38_Maximum intensity projection.tif	shARL13b_2	30	180.036	0.183297	VC2872	s_4	48h
8	Copy of Image 39_Maximum intensity projection.tif	shARL13b_2	31	115.673	0.0691603	VC2872	s_4	48h

## Sheet: Figure_2_F_24h
Image.Name	Minute	Summary.Statistic	Area	Average.intensity	Total.intensity	Image	Overlay	Treatment	NormAvgAVG	NormAvgTOT	Dissociation	SLIDE
Maximum-3	5	Average	0.064954	12131.4	152791	Copy of c8 D.tif	GRB_B	CTL	0.682451	0.777372	VC2589	VC2589_S3
Maximum-3	11	Average	0.0544904	16828.3	167598	Copy of c5 D.tif	GRB_B	CTL	0.946672	0.852705	VC2589	VC2589_S2
Maximum-3	59	Average	0.0641212	15106.4	174338	Copy of c7 D.tif	GRB_B	CTL	0.849811	0.886998	VC2589	VC2589_S3
Maximum-3	46	Average	0.0724486	18348.6	230078	Copy of c2 D.tif	GRB_B	CTL	1.0322	1.17059	VC2589	VC2589_S1
Maximum-3	19	Average	0.0519329	26466.5	257937	Copy of c6 D.tif	GRB_B	CTL	1.48887	1.31233	VC2589	VC2589_S2
Maximum-3	15	Average	0.0454678	12840	95145.5	s2 c6 D.tif	GRB_B	shARL13b_1	0.722311	0.484081	VC2589	VC2589_S9
Maximum-3	16	Average	0.0442334	11913.4	95760.9	sh c4 D.tif	GRB_B	shARL13b_1	0.670186	0.487212	VC2589	VC2589_S4
Maximum-3	41	Average	0.0367688	13669.4	105294	sh c7 D.tif	GRB_B	shARL13b_1	0.76897	0.535715	VC2589	VC2589_S6
Maximum-3	31	Average	0.0435476	15273.5	115483	sh c6 D.tif	GRB_B	shARL13b_1	0.859211	0.587553	VC2589	VC2589_S5
Maximum-3	0	Average	0.0510055	11419.1	116247	s2 c1 D.tif	GRB_B	shARL13b_1	0.642381	0.591442	VC2589	VC2589_S7
Maximum-3	28	Average	0.0527696	13311.5	133471	s2 c4 D.tif	GRB_B	shARL13b_1	0.748838	0.679075	VC2589	VC2589_S8
Maximum-3	27	Average	0.0408044	17919.2	135014	s2 c3 D.tif	GRB_B	shARL13b_1	1.00804	0.686926	VC2589	VC2589_S8
Maximum-3	35	Average	0.0489653	21443	196028	s2 c5 D.tif	GRB_B	shARL13b_1	1.20628	0.997353	VC2589	VC2589_S9
Maximum-3	19	Average	0.0507973	21380.6	202813	s2 c2 D.tif	GRB_B	shARL13b_1	1.20277	1.03187	VC2589	VC2589_S7
Blue	56	Average	0.0882816	14400.5	74231.7	Copy of Image 2_Maximum intensity projection.tif	GRB_B	CTL	0.944072	0.967193	VC2616	VC2616_S1
Blue	59	Average	0.086328	16106.7	79267.6	Copy of Image 5_Maximum intensity projection.tif	GRB_B	CTL	1.05593	1.03281	VC2616	VC2616_S2
Blue	2	Average	0.113053	11532.5	78008.4	Copy of Image 14_Maximum intensity projection.tif	GRB_B	shARL13b_1	0.756054	1.0164	VC2616	VC2616_S4
Blue	5	Average	0.110352	19489.2	132270	Copy of Image 8_Maximum intensity projection.tif	GRB_B	shARL13b_1	1.27768	1.72339	VC2616	VC2616_S5
Blue	21	Average	0.0840897	12410.1	59301.2	Copy of Image 6_Maximum intensity projection.tif	GRB_B	CTL	0.760197	0.688765	VC2617	VC2617_S3
Blue	19	Average	0.102221	14002.5	79874.5	Copy of Image 21_Maximum intensity projection.tif	GRB_B	CTL	0.857745	0.927716	VC2617	VC2617_S2
Blue	11	Average	0.0908226	22561.8	119118	Copy of Image 16_Maximum intensity projection.tif	GRB_B	CTL	1.38206	1.38352	VC2617	VC2617_S1
Blue	31	Average	0.0904924	13546.1	70099.9	Copy of Image 3_Maximum intensity projection.tif	GRB_B	shARL13b_1	0.829785	0.814188	VC2617	VC2617_S6
Blue	27	Average	0.0949889	14434.2	76352.3	Copy of Image 12_Maximum intensity projection.tif	GRB_B	shARL13b_1	0.884189	0.886807	VC2617	VC2617_S4
Blue	30	Average	0.077616	16437.3	79571.7	Copy of Image 25_Maximum intensity projection.tif	GRB_B	shARL13b_1	1.00689	0.9242	VC2617	VC2617_S5
Blue	33	Average	0.0935259	19725.7	106001	Copy of Image 9_Maximum intensity projection.tif	GRB_B	shARL13b_1	1.20833	1.23117	VC2617	VC2617_S7
Blue	53	Average	0.093456	12380.3	68772.7	Copy of Image 16_Maximum intensity projection.tif	GRB_B	CTL	0.814676	0.74288	VC2619	VC2619_S2
Blue	56	Average	0.107033	13941.5	93159.1	Copy of Image 7_Maximum intensity projection.tif	GRB_B	CTL	0.917408	1.0063	VC2619	VC2619_S3
Blue	50	Average	0.0969363	19268.1	115796	Copy of Image 12_Maximum intensity projection.tif	GRB_B	CTL	1.26792	1.25082	VC2619	VC2619_S1
Blue	0	Average	0.0944917	14241.5	78568.6	Copy of Image 2_Maximum intensity projection.tif	GRB_B	shARL13b_1	0.937148	0.848694	VC2619	VC2619_S5
Blue	2	Average	0.098604	20206.9	122444	Copy of Image 9_Maximum intensity projection.tif	GRB_B	shARL13b_1	1.3297	1.32263	VC2619	VC2619_S6
Blue	57	Average	0.109707	25890.9	173202	Copy of Image 19_Maximum intensity projection.tif	GRB_B	shARL13b_1	1.70373	1.87092	VC2619	VC2619_S4
Blue	7	Average	0.08712	5268.47	28140.9	6.tif	GRB_B	CTL	0.84978	0.678786	VC2885	VC2885_S2
Blue	12	Average	0.12584	5695.96	43161.1	8.tif	GRB_B	CTL	0.918732	1.04109	VC2885	VC2885_S2
Blue	4	Average	0.126946	6012.51	43813.5	12.tif	GRB_B	CTL	0.96979	1.05683	VC2885	VC2885_S4
Blue	10	Average	0.0991366	7822.28	50715.1	7.tif	GRB_B	CTL	1.2617	1.2233	VC2885	VC2885_S2
Blue	20	Average	0.114301	5559.87	38932.2	9.tif	GRB_B	shARL13b_1	0.896782	0.939085	VC2885	VC2885_S3
Blue	17	Average	0.11616	7053.43	51274.1	2.tif	GRB_B	shARL13b_1	1.13769	1.23678	VC2885	VC2885_S1
Blue	15	Average	0.120134	8993.16	71433.6	11.tif	GRB_B	shARL13b_1	1.45056	1.72305	VC2885	VC2885_S3
Blue	19	Average	0.157574	8877.11	86008.4	3.tif	GRB_B	shARL13b_1	1.43184	2.07461	VC2885	VC2885_S1
Maximum-2	19	Average	0.0519329	18222.1	180579	Copy of c6 D.tif	GRB_R	CTL	0.846006	0.703071	VC2589	VC2589_S2
Maximum-2	59	Average	0.0641212	19865.1	242282	Copy of c7 D.tif	GRB_R	CTL	0.922291	0.943307	VC2589	VC2589_S3
Maximum-2	11	Average	0.0544904	23421.3	247599	Copy of c5 D.tif	GRB_R	CTL	1.08739	0.964007	VC2589	VC2589_S2
Maximum-2	5	Average	0.064954	22292.4	278428	Copy of c8 D.tif	GRB_R	CTL	1.03498	1.08404	VC2589	VC2589_S3
Maximum-2	46	Average	0.0724486	23893.7	335329	Copy of c2 D.tif	GRB_R	CTL	1.10933	1.30558	VC2589	VC2589_S1
Maximum-2	31	Average	0.0435476	15175	119650	sh c6 D.tif	GRB_R	shARL13b_1	0.704538	0.465848	VC2589	VC2589_S5
Maximum-2	27	Average	0.0408044	16754.3	124352	s2 c3 D.tif	GRB_R	shARL13b_1	0.777862	0.484153	VC2589	VC2589_S8
Maximum-2	41	Average	0.0367688	18833.2	128707	sh c7 D.tif	GRB_R	shARL13b_1	0.87438	0.501111	VC2589	VC2589_S6
Maximum-2	16	Average	0.0442334	15971.1	136453	sh c4 D.tif	GRB_R	shARL13b_1	0.741501	0.53127	VC2589	VC2589_S4
Maximum-2	28	Average	0.0527696	15732.1	144669	s2 c4 D.tif	GRB_R	shARL13b_1	0.730404	0.563259	VC2589	VC2589_S8
Maximum-2	15	Average	0.0454678	18635	145432	s2 c6 D.tif	GRB_R	shARL13b_1	0.86518	0.56623	VC2589	VC2589_S9
Maximum-2	0	Average	0.0510055	15563.9	157764	s2 c1 D.tif	GRB_R	shARL13b_1	0.722594	0.614242	VC2589	VC2589_S7
Maximum-2	35	Average	0.0489653	17065.3	163358	s2 c5 D.tif	GRB_R	shARL13b_1	0.792301	0.636023	VC2589	VC2589_S9
Maximum-2	19	Average	0.0507973	18497.2	178504	s2 c2 D.tif	GRB_R	shARL13b_1	0.858781	0.69499	VC2589	VC2589_S7
Red	59	Average	0.086328	18149.2	93972.3	Copy of Image 5_Maximum intensity projection.tif	GRB_R	CTL	0.980318	0.998155	VC2616	VC2616_S2
Red	56	Average	0.0882816	18877.9	94319.6	Copy of Image 2_Maximum intensity projection.tif	GRB_R	CTL	1.01968	1.00184	VC2616	VC2616_S1
Red	5	Average	0.110352	22671.6	160921	Copy of Image 8_Maximum intensity projection.tif	GRB_R	shARL13b_1	1.2246	1.70928	VC2616	VC2616_S5
Red	2	Average	0.113053	27974.7	189174	Copy of Image 14_Maximum intensity projection.tif	GRB_R	shARL13b_1	1.51104	2.00937	VC2616	VC2616_S4
Red	21	Average	0.0840897	16660.3	78582.1	Copy of Image 6_Maximum intensity projection.tif	GRB_R	CTL	1.0218	0.885347	VC2617	VC2617_S3
Red	19	Average	0.102221	13774.8	82942.2	Copy of Image 21_Maximum intensity projection.tif	GRB_R	CTL	0.844826	0.93447	VC2617	VC2617_S2
Red	11	Average	0.0908226	18479.6	104751	Copy of Image 16_Maximum intensity projection.tif	GRB_R	CTL	1.13338	1.18018	VC2617	VC2617_S1
Red	30	Average	0.077616	14285.5	75838.4	Copy of Image 25_Maximum intensity projection.tif	GRB_R	shARL13b_1	0.876148	0.854435	VC2617	VC2617_S5
Red	27	Average	0.0949889	14807.3	83765	Copy of Image 12_Maximum intensity projection.tif	GRB_R	shARL13b_1	0.908152	0.94374	VC2617	VC2617_S4
Red	31	Average	0.0904924	15906.9	85276.6	Copy of Image 3_Maximum intensity projection.tif	GRB_R	shARL13b_1	0.97559	0.960771	VC2617	VC2617_S6
Red	33	Average	0.0935259	22339.8	130054	Copy of Image 9_Maximum intensity projection.tif	GRB_R	shARL13b_1	1.37013	1.46526	VC2617	VC2617_S7
Red	53	Average	0.093456	20359.9	111302	Copy of Image 16_Maximum intensity projection.tif	GRB_R	CTL	0.906659	0.80593	VC2619	VC2619_S2
Red	50	Average	0.0969363	21500.8	130072	Copy of Image 12_Maximum intensity projection.tif	GRB_R	CTL	0.957464	0.941839	VC2619	VC2619_S1
Red	56	Average	0.107033	25507.3	172938	Copy of Image 7_Maximum intensity projection.tif	GRB_R	CTL	1.13588	1.25223	VC2619	VC2619_S3
Red	0	Average	0.0944917	16771.1	94281.2	Copy of Image 2_Maximum intensity projection.tif	GRB_R	shARL13b_1	0.746842	0.682682	VC2619	VC2619_S5
Red	2	Average	0.098604	16827.7	104307	Copy of Image 9_Maximum intensity projection.tif	GRB_R	shARL13b_1	0.749365	0.755278	VC2619	VC2619_S6
Red	57	Average	0.109707	18581.8	126379	Copy of Image 19_Maximum intensity projection.tif	GRB_R	shARL13b_1	0.827478	0.9151	VC2619	VC2619_S4
Red	7	Average	0.08712	7919.4	42299.3	6.tif	GRB_R	CTL	0.656015	0.50546	VC2885	VC2885_S2
Red	10	Average	0.0991366	13080.2	83250.8	7.tif	GRB_R	CTL	1.08352	0.994814	VC2885	VC2885_S2
Red	12	Average	0.12584	13144.9	95946.2	8.tif	GRB_R	CTL	1.08888	1.14652	VC2885	VC2885_S2
Red	4	Average	0.126946	14143.3	113243	12.tif	GRB_R	CTL	1.17158	1.35321	VC2885	VC2885_S4
Red	17	Average	0.11616	11283.7	77014.5	2.tif	GRB_R	shARL13b_1	0.934703	0.920292	VC2885	VC2885_S1
Red	20	Average	0.114301	13134	88547.6	9.tif	GRB_R	shARL13b_1	1.08798	1.05811	VC2885	VC2885_S3
Red	15	Average	0.120134	12972.4	98265.5	11.tif	GRB_R	shARL13b_1	1.07459	1.17423	VC2885	VC2885_S3
Red	19	Average	0.157574	16366.9	146347	3.tif	GRB_R	shARL13b_1	1.35578	1.74879	VC2885	VC2885_S1

## Sheet: Figure_2_G_24h
Count	Image	Treatment	Order_Analysed	Distance	Density	Dissociation	SLIDE
28	Copy of c2 D.tif	CTL	2	128.731	0.217508	VC2589	VC2589_S1
46	Copy of c5 D.tif	CTL	5	186.829	0.246215	VC2589	VC2589_S2
22	Copy of c6 D.tif	CTL	6	99.4034	0.22132	VC2589	VC2589_S2
17	Copy of c7 D.tif	CTL	7	242.387	0.0701357	VC2589	VC2589_S3
7	Copy of c8 D.tif	CTL	8	204.476	0.0342339	VC2589	VC2589_S3
17	sh c4 D.tif	shARL13b_1	12	211.953	0.0802064	VC2589	VC2589_S4
17	sh c6 D.tif	shARL13b_1	14	154.617	0.109949	VC2589	VC2589_S5
13	sh c7 D.tif	shARL13b_1	15	152.875	0.085037	VC2589	VC2589_S6
16	s2 c1 D.tif	shARL13b_1	16	365.807	0.0437389	VC2589	VC2589_S7
28	s2 c2 D.tif	shARL13b_1	17	126.042	0.222149	VC2589	VC2589_S7
22	s2 c3 D.tif	shARL13b_1	18	83.6979	0.26285	VC2589	VC2589_S8
19	s2 c4 D.tif	shARL13b_1	19	123.807	0.153464	VC2589	VC2589_S8
5	s2 c5 D.tif	shARL13b_1	20	20.0105	0.249869	VC2589	VC2589_S9
15	s2 c6 D.tif	shARL13b_1	21	192.147	0.0780654	VC2589	VC2589_S9
15	Copy of Image 2_Maximum intensity projection.tif	CTL	1	167.507	0.0895485	VC2616	VC2616_S1
22	Copy of Image 5_Maximum intensity projection.tif	CTL	2	337.944	0.0650996	VC2616	VC2616_S2
43	Copy of Image 14_Maximum intensity projection.tif	shARL13b_1	4	651.99	0.0659519	VC2616	VC2616_S4
15	Copy of Image 8_Maximum intensity projection.tif	shARL13b_1	5	160.32	0.0935631	VC2616	VC2616_S5
80	Copy of Image 16_Maximum intensity projection.tif	CTL	1	513.329	0.155845	VC2617	VC2617_S1
15	Copy of Image 21_Maximum intensity projection.tif	CTL	2	309.277	0.0485002	VC2617	VC2617_S2
23	Copy of Image 6_Maximum intensity projection.tif	CTL	3	117.66	0.195478	VC2617	VC2617_S3
31	Copy of Image 12_Maximum intensity projection.tif	shARL13b_1	4	275.397	0.112565	VC2617	VC2617_S4
11	Copy of Image 25_Maximum intensity projection.tif	shARL13b_1	5	166.215	0.0661792	VC2617	VC2617_S5
31	Copy of Image 3_Maximum intensity projection.tif	shARL13b_1	6	255.146	0.121499	VC2617	VC2617_S6
68	Copy of Image 9_Maximum intensity projection.tif	shARL13b_1	7	466.477	0.145773	VC2617	VC2617_S7
71	Copy of Image 12_Maximum intensity projection.tif	CTL	1	349.675	0.203046	VC2619	VC2619_S1
22	Copy of Image 16_Maximum intensity projection.tif	CTL	2	235.388	0.0934629	VC2619	VC2619_S2
14	Copy of Image 7_Maximum intensity projection.tif	CTL	3	173.3	0.0807849	VC2619	VC2619_S3
27	Copy of Image 19_Maximum intensity projection.tif	shARL13b_1	4	95.1333	0.283812	VC2619	VC2619_S4
26	Copy of Image 2_Maximum intensity projection.tif	shARL13b_1	5	311.86	0.0833707	VC2619	VC2619_S5
44	Copy of Image 9_Maximum intensity projection.tif	shARL13b_1	6	495.742	0.0887558	VC2619	VC2619_S6
21	12.tif	CTL	1	544.986	0.0385331	VC2885	VC2885_S4
23	6.tif	CTL	2	851.772	0.0270025	VC2885	VC2885_S2
29	7.tif	CTL	3	345.397	0.0839614	VC2885	VC2885_S2
9	8.tif	CTL	4	281.735	0.0319449	VC2885	VC2885_S2
19	11.tif	shARL13b_1	6	519.126	0.0366	VC2885	VC2885_S3
15	2.tif	shARL13b_1	7	335.392	0.0447238	VC2885	VC2885_S1
23	3.tif	shARL13b_1	8	428.545	0.05367	VC2885	VC2885_S1
25	9.tif	shARL13b_1	9	456.699	0.0547407	VC2885	VC2885_S3

## Sheet: Figure_2F_48h
Image.Name	Minute	Summary.Statistic	Area	Average.intensity	Total.intensity	Image	Overlay	Treatment	NormAvgAVG	NormAvgTOT	Dissociation
Red	47	Average	0.084942	10397.2	53851.8	Copy of Image 1_Maximum intensity projection.tif	GRB_R	CTL	1.37721	0.984791	VC2901
Red	49	Average	0.114501	7795.29	55486.2	Copy of Image 2_Maximum intensity projection.tif	GRB_R	CTL	1.03256	1.01468	VC2901
Red	52	Average	0.136488	6952.26	58645.3	Copy of Image 3_Maximum intensity projection.tif	GRB_R	CTL	0.920895	1.07245	VC2901
Red	55	Average	0.0901241	6340.25	35481.7	Copy of Image 4_Maximum intensity projection.tif	GRB_R	CTL	0.839828	0.648857	VC2901
Red	57	Average	0.107033	5527.13	38655.9	Copy of Image 5_Maximum intensity projection.tif	GRB_R	CTL	0.732122	0.706904	VC2901
Red	0	Average	0.164076	8284.68	85979.7	Copy of Image 6_Maximum intensity projection.tif	GRB_R	CTL	1.09739	1.57232	VC2901
Red	2	Average	0.105291	6983.37	45160.3	Copy of Image 10_Maximum intensity projection.tif	GRB_R	shARL13b_2	0.925015	0.82585	VC2901
Red	5	Average	0.106378	7456.77	49598.8	Copy of Image 11_Maximum intensity projection.tif	GRB_R	shARL13b_2	0.987721	0.907017	VC2901
Red	7	Average	0.12147	10586.8	88400.5	Copy of Image 12_Maximum intensity projection.tif	GRB_R	shARL13b_2	1.40233	1.61659	VC2901
Red	9	Average	0.0991828	8845.55	64983.9	Copy of Image 13_Maximum intensity projection.tif	GRB_R	shARL13b_2	1.17168	1.18837	VC2901
Red	11	Average	0.108346	8314.2	55538.5	Copy of Image 7_Maximum intensity projection.tif	GRB_R	shARL13b_2	1.1013	1.01564	VC2901
Red	12	Average	0.094743	8507.99	45608.3	Copy of Image 8_Maximum intensity projection.tif	GRB_R	shARL13b_2	1.12697	0.834042	VC2901
Red	14	Average	0.12584	10986.1	77957.4	Copy of Image 9_Maximum intensity projection.tif	GRB_R	shARL13b_2	1.45521	1.42561	VC2901
Red	15	Average	0.135907	11109.2	90743.7	Copy of Image 14_Maximum intensity projection.tif	GRB_R	sh1826	1.47152	1.65944	VC2901
Red	18	Average	0.118338	8837.76	65574.2	Copy of Image 15_Maximum intensity projection.tif	GRB_R	sh1826	1.17065	1.19916	VC2901
Red	20	Average	0.112586	5608.47	41595.2	Copy of Image 16_Maximum intensity projection.tif	GRB_R	sh1826	0.742897	0.760654	VC2901
Red	22	Average	0.121968	9581.23	70375.7	Copy of Image 17_Maximum intensity projection.tif	GRB_R	sh1826	1.26913	1.28697	VC2901
Blue	47	Average	0.084942	7291.9	36932.8	Copy of Image 1_Maximum intensity projection.tif	GRB_B	CTL	0.938766	0.639726	VC2901
Blue	49	Average	0.114501	9602.69	72491.6	Copy of Image 2_Maximum intensity projection.tif	GRB_B	CTL	1.23626	1.25565	VC2901
Blue	52	Average	0.136488	6294	50508.3	Copy of Image 3_Maximum intensity projection.tif	GRB_B	CTL	0.810296	0.874873	VC2901
Blue	55	Average	0.0901241	7155.55	37510.2	Copy of Image 4_Maximum intensity projection.tif	GRB_B	CTL	0.921212	0.649728	VC2901
Blue	57	Average	0.107033	6720.68	44417.8	Copy of Image 5_Maximum intensity projection.tif	GRB_B	CTL	0.865227	0.769377	VC2901
Blue	0	Average	0.164076	9540.4	104532	Copy of Image 6_Maximum intensity projection.tif	GRB_B	CTL	1.22824	1.81064	VC2901
Blue	2	Average	0.105291	5976.06	36320.1	Copy of Image 10_Maximum intensity projection.tif	GRB_B	shARL13b_2	0.769364	0.629114	VC2901
Blue	5	Average	0.106378	8028.43	51372.4	Copy of Image 11_Maximum intensity projection.tif	GRB_B	shARL13b_2	1.03359	0.889841	VC2901
Blue	7	Average	0.12147	9132.88	71174	Copy of Image 12_Maximum intensity projection.tif	GRB_B	shARL13b_2	1.17578	1.23283	VC2901
Blue	9	Average	0.0991828	9261.63	57488.2	Copy of Image 13_Maximum intensity projection.tif	GRB_B	shARL13b_2	1.19235	0.995773	VC2901
Blue	11	Average	0.108346	5621.39	37091.8	Copy of Image 7_Maximum intensity projection.tif	GRB_B	shARL13b_2	0.723703	0.64248	VC2901
Blue	12	Average	0.094743	6785.61	33477.4	Copy of Image 8_Maximum intensity projection.tif	GRB_B	shARL13b_2	0.873586	0.579874	VC2901
Blue	14	Average	0.12584	6223.18	48053	Copy of Image 9_Maximum intensity projection.tif	GRB_B	shARL13b_2	0.801179	0.832343	VC2901
Blue	15	Average	0.135907	7538.14	58906.8	Copy of Image 14_Maximum intensity projection.tif	GRB_B	sh1826	0.970467	1.02035	VC2901
Blue	18	Average	0.118338	7796.24	57371.1	Copy of Image 15_Maximum intensity projection.tif	GRB_B	sh1826	1.0037	0.993745	VC2901
Blue	20	Average	0.112586	6534.79	42344.2	Copy of Image 16_Maximum intensity projection.tif	GRB_B	sh1826	0.841295	0.73346	VC2901
Blue	22	Average	0.121968	8094.22	60924.1	Copy of Image 17_Maximum intensity projection.tif	GRB_B	sh1826	1.04206	1.05529	VC2901
Red	34	Average	0.079376	8883.05	41178.7	10.tif	GRB_R	CTL	0.861123	0.606108	VC2900
Red	39	Average	0.107712	11535.1	77030.3	2.tif	GRB_R	CTL	1.11821	1.13381	VC2900
Red	43	Average	0.109824	10547.9	70165.3	4.tif	GRB_R	CTL	1.02252	1.03276	VC2900
Red	46	Average	0.0970766	10444.5	57902.4	5.tif	GRB_R	CTL	1.01249	0.852264	VC2900
Red	50	Average	0.11088	11020.4	75702.5	6.tif	GRB_R	CTL	1.06832	1.11426	VC2900
Red	53	Average	0.136903	11901.3	105143	7.tif	GRB_R	CTL	1.15371	1.5476	VC2900
Red	58	Average	0.089056	7877.44	48454.4	9.tif	GRB_R	CTL	0.763638	0.7132	VC2900
Red	1	Average	0.109024	9447.64	62090.7	12.tif	GRB_R	shARL13b_2	0.915854	0.913912	VC2900
Red	13	Average	0.126946	7718.3	56763.3	16.tif	GRB_R	shARL13b_2	0.748212	0.835497	VC2900
Red	16	Average	0.0991828	8801.78	55447.6	17.tif	GRB_R	shARL13b_2	0.853244	0.816132	VC2900
Red	17	Average	0.13068	10227.7	76771.6	18.tif	GRB_R	sh1826	0.991473	1.13	VC2900
Red	21	Average	0.090024	9760.93	53557.9	20.tif	GRB_R	sh1826	0.946224	0.788318	VC2900
Red	24	Average	0.103092	10944.3	64389.1	21.tif	GRB_R	sh1826	1.06094	0.947741	VC2900
Red	27	Average	0.099099	10223.2	58852.8	22.tif	GRB_R	sh1826	0.991033	0.866254	VC2900
Red	32	Average	0.110767	10967.4	77019.5	23.tif	GRB_R	sh1826	1.06318	1.13365	VC2900
Red	37	Average	0.0924229	11572.9	62018.4	25.tif	GRB_R	sh1826	1.12188	0.912847	VC2900
Blue	34	Average	0.079376	3751.81	16340.3	10.tif	GRB_B	CTL	0.701521	0.458243	VC2900
Blue	39	Average	0.107712	6747.9	46497	2.tif	GRB_B	CTL	1.26174	1.30395	VC2900
Blue	43	Average	0.109824	7289.32	46325.9	4.tif	GRB_B	CTL	1.36297	1.29915	VC2900
Blue	46	Average	0.0970766	4588.26	25676.8	5.tif	GRB_B	CTL	0.857921	0.720071	VC2900
Blue	50	Average	0.11088	5649.09	45953.7	6.tif	GRB_B	CTL	1.05628	1.28871	VC2900
Blue	53	Average	0.136903	4839.62	43966.5	7.tif	GRB_B	CTL	0.90492	1.23298	VC2900
Blue	58	Average	0.089056	4570.81	24850.6	9.tif	GRB_B	CTL	0.854658	0.696901	VC2900
Blue	1	Average	0.109024	7854.29	62217.8	12.tif	GRB_B	shARL13b_2	1.46861	1.74482	VC2900
Blue	13	Average	0.126946	5026.46	41432.1	16.tif	GRB_B	shARL13b_2	0.939857	1.16191	VC2900
Blue	16	Average	0.0991828	6806.92	40565.8	17.tif	GRB_B	shARL13b_2	1.27277	1.13762	VC2900
Blue	17	Average	0.13068	7042.5	58790.6	18.tif	GRB_B	sh1826	1.31682	1.64871	VC2900
Blue	21	Average	0.090024	7244.21	40352.2	20.tif	GRB_B	sh1826	1.35453	1.13163	VC2900
Blue	24	Average	0.103092	5732.19	34827.5	21.tif	GRB_B	sh1826	1.07181	0.976691	VC2900
Blue	27	Average	0.099099	5493.48	30138.6	22.tif	GRB_B	sh1826	1.02718	0.845198	VC2900
Blue	32	Average	0.110767	5547.94	36009.7	23.tif	GRB_B	sh1826	1.03736	1.00984	VC2900
Blue	37	Average	0.0924229	4876.24	29909.5	25.tif	GRB_B	sh1826	0.911768	0.838772	VC2900
Red	1	Average	0.128053	11462.1	96558.4	10.tif	GRB_R	CTL	0.988549	0.917675	VC2903
Red	9	Average	0.167376	12780	142600	12.tif	GRB_R	CTL	1.10221	1.35525	VC2903
Red	11	Average	0.132422	12629.3	112700	13.tif	GRB_R	CTL	1.08921	1.07108	VC2903
Red	13	Average	0.132996	10188.6	89905.7	14.tif	GRB_R	CTL	0.878713	0.854449	VC2903
Red	15	Average	0.124261	9549.58	73438.7	15.tif	GRB_R	CTL	0.823603	0.697949	VC2903
Red	17	Average	0.126129	8953.51	68611.5	16.tif	GRB_R	CTL	0.772195	0.652072	VC2903
Red	18	Average	0.13728	11101.1	97164.8	32.tif	GRB_R	CTL	0.957414	0.923438	VC2903
Red	20	Average	0.165149	15770.3	169637	34.tif	GRB_R	CTL	1.36011	1.6122	VC2903
Red	22	Average	0.150441	11399.3	115425	35.tif	GRB_R	CTL	0.983133	1.09698	VC2903
Red	24	Average	0.140637	12266.6	106124	37.tif	GRB_R	CTL	1.05793	1.00858	VC2903
Red	26	Average	0.152299	11963.5	109104	38.tif	GRB_R	CTL	1.03179	1.03691	VC2903
Red	27	Average	0.12453	11074.8	81379.7	39.tif	GRB_R	CTL	0.955143	0.773419	VC2903
Red	31	Average	0.126248	9740.91	77263.3	22.tif	GRB_R	sh1826	0.840104	0.734298	VC2903
Red	34	Average	0.0899078	10916	62808	23.tif	GRB_R	sh1826	0.941451	0.596917	VC2903
Red	35	Average	0.152271	10264.1	98296	24.tif	GRB_R	sh1826	0.88523	0.934189	VC2903
Red	37	Average	0.139036	13833.7	123366	25.tif	GRB_R	sh1826	1.19308	1.17245	VC2903
Red	41	Average	0.156146	12465	121534	26.tif	GRB_R	sh1826	1.07504	1.15504	VC2903
Red	44	Average	0.174937	12740.8	153572	28.tif	GRB_R	sh1826	1.09883	1.45952	VC2903
Red	46	Average	0.127776	11150.5	88016.8	29.tif	GRB_R	sh1826	0.961672	0.836497	VC2903
Red	50	Average	0.146362	9422.36	85942	30.tif	GRB_R	sh1826	0.812631	0.816778	VC2903
Red	51	Average	0.164906	14963.6	150010	31.tif	GRB_R	sh1826	1.29054	1.42567	VC2903
Red	54	Average	0.146678	11886.6	112214	5.tif	GRB_R	sh1826	1.02516	1.06647	VC2903
Red	57	Average	0.140885	14520.3	129807	7.tif	GRB_R	sh1826	1.2523	1.23366	VC2903
Red	59	Average	0.125779	10819.1	80926.2	8.tif	GRB_R	sh1826	0.933095	0.769109	VC2903
Red	1	Average	0.14948	13819	134499	9.tif	GRB_R	sh1826	1.19182	1.27826	VC2903
Red	2	Average	0.13068	11469.7	100959	17.tif	GRB_R	shARL13b_2	0.989204	0.959495	VC2903
Red	5	Average	0.127292	10244.9	78060	19.tif	GRB_R	shARL13b_2	0.883572	0.741869	VC2903
Red	7	Average	0.145864	11978.8	107602	20.tif	GRB_R	shARL13b_2	1.03311	1.02264	VC2903
Red	9	Average	0.113727	9059.53	64668.4	21.tif	GRB_R	shARL13b_2	0.781339	0.614597	VC2903
Red	12	Average	0.126677	10543.6	82902.4	40.tif	GRB_R	shARL13b_2	0.909332	0.78789	VC2903
Red	14	Average	0.108803	7929.45	54232.2	41.tif	GRB_R	shARL13b_2	0.683875	0.515414	VC2903
Red	16	Average	0.126448	8905.62	76003.2	42.tif	GRB_R	shARL13b_2	0.768065	0.722322	VC2903
Red	18	Average	0.167065	10205.7	111807	43.tif	GRB_R	shARL13b_2	0.880194	1.0626	VC2903
Red	20	Average	0.143889	10192.6	84682.2	44.tif	GRB_R	shARL13b_2	0.879063	0.804805	VC2903
Blue	1	Average	0.128053	8153.79	68640.8	10.tif	GRB_B	CTL	1.07211	1.01739	VC2903
Blue	9	Average	0.167376	6598.27	69146.7	12.tif	GRB_B	CTL	0.867582	1.02489	VC2903
Blue	11	Average	0.132422	9991.52	96204.5	13.tif	GRB_B	CTL	1.31375	1.42594	VC2903
Blue	13	Average	0.132996	6384.65	54421.1	14.tif	GRB_B	CTL	0.839493	0.806627	VC2903
Blue	15	Average	0.124261	6418.01	50184.7	15.tif	GRB_B	CTL	0.84388	0.743834	VC2903
Blue	17	Average	0.126129	11434.1	84556.3	16.tif	GRB_B	CTL	1.50343	1.25329	VC2903
Blue	18	Average	0.13728	5721.18	45531.5	32.tif	GRB_B	CTL	0.752257	0.674866	VC2903
Blue	20	Average	0.165149	7456.64	78809.7	34.tif	GRB_B	CTL	0.980445	1.16811	VC2903
Blue	22	Average	0.150441	8055.68	83003.8	35.tif	GRB_B	CTL	1.05921	1.23028	VC2903
Blue	24	Average	0.140637	5669.02	53774.7	37.tif	GRB_B	CTL	0.745398	0.797046	VC2903
Blue	26	Average	0.152299	8696.75	76351.1	38.tif	GRB_B	CTL	1.1435	1.13167	VC2903
Blue	27	Average	0.12453	6684.69	48985.1	39.tif	GRB_B	CTL	0.878945	0.726055	VC2903
Blue	31	Average	0.126248	6310.3	50574.6	22.tif	GRB_B	sh1826	0.829718	0.749614	VC2903
Blue	34	Average	0.0899078	7261.69	36355.2	23.tif	GRB_B	sh1826	0.954812	0.538855	VC2903
Blue	35	Average	0.152271	5882.49	54366.9	24.tif	GRB_B	sh1826	0.773467	0.805823	VC2903
Blue	37	Average	0.139036	5980.14	50786.2	25.tif	GRB_B	sh1826	0.786306	0.75275	VC2903
Blue	41	Average	0.156146	7432.15	68423.7	26.tif	GRB_B	sh1826	0.977226	1.01417	VC2903
Blue	44	Average	0.174937	11376.6	151334	28.tif	GRB_B	sh1826	1.49587	2.24306	VC2903
Blue	46	Average	0.127776	6841.75	53410.2	29.tif	GRB_B	sh1826	0.899596	0.791643	VC2903
Blue	50	Average	0.146362	5566.72	51513.9	30.tif	GRB_B	sh1826	0.731947	0.763536	VC2903
Blue	51	Average	0.164906	9709.97	104543	31.tif	GRB_B	sh1826	1.27673	1.54953	VC2903
Blue	54	Average	0.146678	6993.16	67900.2	5.tif	GRB_B	sh1826	0.919504	1.00641	VC2903
Blue	57	Average	0.140885	10234.1	94748.8	7.tif	GRB_B	sh1826	1.34564	1.40436	VC2903
Blue	59	Average	0.125779	5997.47	44547.7	8.tif	GRB_B	sh1826	0.788585	0.660284	VC2903
Blue	1	Average	0.14948	6776.72	63612.9	9.tif	GRB_B	sh1826	0.891045	0.942868	VC2903
Blue	2	Average	0.13068	7663.71	61021	17.tif	GRB_B	shARL13b_2	1.00767	0.90445	VC2903
Blue	5	Average	0.127292	6819.33	52571	19.tif	GRB_B	shARL13b_2	0.896648	0.779205	VC2903
Blue	7	Average	0.145864	7681.94	69666.6	20.tif	GRB_B	shARL13b_2	1.01007	1.0326	VC2903
Blue	9	Average	0.113727	6541.65	43898.5	21.tif	GRB_B	shARL13b_2	0.860137	0.650662	VC2903
Blue	12	Average	0.126677	6991.86	54839.8	40.tif	GRB_B	shARL13b_2	0.919333	0.812833	VC2903
Blue	14	Average	0.108803	11610.5	81001.7	41.tif	GRB_B	shARL13b_2	1.52663	1.2006	VC2903
Blue	16	Average	0.126448	8905.2	73845.7	42.tif	GRB_B	shARL13b_2	1.17091	1.09454	VC2903
Blue	18	Average	0.167065	12281.9	129670	43.tif	GRB_B	shARL13b_2	1.6149	1.92197	VC2903
Blue	20	Average	0.143889	5411.27	44433.5	44.tif	GRB_B	shARL13b_2	0.711507	0.658591	VC2903

## Sheet: Figure_2G_48h
Count	Image	Treatment	Order_Analysed	Distance	Density	Dissociation
9	10.tif	CTL	1	255.223	0.0352633	VC2900
22	2.tif	CTL	2	503.637	0.0436823	VC2900
33	4.tif	CTL	3	323.794	0.101917	VC2900
21	5.tif	CTL	4	542.783	0.0386895	VC2900
22	6.tif	CTL	5	592.931	0.0371038	VC2900
14	7.tif	CTL	6	484.64	0.0288874	VC2900
9	9.tif	CTL	7	129.009	0.0697626	VC2900
35	12.tif	shARL13b_2	8	812.152	0.0430954	VC2900
7	16.tif	shARL13b_2	12	162.144	0.0431715	VC2900
13	17.tif	shARL13b_2	13	174.377	0.074551	VC2900
22	18.tif	sh1826	14	390.159	0.0563872	VC2900
12	20.tif	sh1826	15	299.577	0.0400564	VC2900
36	21.tif	sh1826	16	474.729	0.0758328	VC2900
32	22.tif	sh1826	17	1065.67	0.030028	VC2900
14	23.tif	sh1826	18	185.461	0.0754874	VC2900
23	25.tif	sh1826	20	481.443	0.047773	VC2900
40	Copy of Image 1_Maximum intensity projection.tif	CTL	1	373.723	0.107031	VC2901
21	Copy of Image 2_Maximum intensity projection.tif	CTL	2	406.127	0.0517079	VC2901
18	Copy of Image 3_Maximum intensity projection.tif	CTL	3	503.308	0.0357634	VC2901
29	Copy of Image 4_Maximum intensity projection.tif	CTL	4	170.647	0.169941	VC2901
14	Copy of Image 5_Maximum intensity projection.tif	CTL	5	299.007	0.0468216	VC2901
36	Copy of Image 6_Maximum intensity projection.tif	CTL	6	293.916	0.122484	VC2901
70	Copy of Image 10_Maximum intensity projection.tif	shARL13b_2	7	601.302	0.116414	VC2901
38	Copy of Image 11_Maximum intensity projection.tif	shARL13b_2	8	441.43	0.0860838	VC2901
35	Copy of Image 12_Maximum intensity projection.tif	shARL13b_2	9	229.518	0.152493	VC2901
13	Copy of Image 13_Maximum intensity projection.tif	shARL13b_2	10	285.401	0.0455499	VC2901
55	Copy of Image 7_Maximum intensity projection.tif	shARL13b_2	11	301.4	0.182482	VC2901
16	Copy of Image 8_Maximum intensity projection.tif	shARL13b_2	12	247.764	0.0645775	VC2901
9	Copy of Image 9_Maximum intensity projection.tif	shARL13b_2	13	120.916	0.0744319	VC2901
15	Copy of Image 14_Maximum intensity projection.tif	sh1826	14	347.623	0.0431502	VC2901
72	Copy of Image 15_Maximum intensity projection.tif	sh1826	15	428.634	0.167976	VC2901
13	Copy of Image 16_Maximum intensity projection.tif	sh1826	16	410.104	0.0316993	VC2901
43	Copy of Image 17_Maximum intensity projection.tif	sh1826	17	179.377	0.239718	VC2901
63	10.tif	CTL	1	880.921	0.0715161	VC2903
33	12.tif	CTL	2	215.43	0.153182	VC2903
20	13.tif	CTL	3	294.406	0.0679334	VC2903
79	14.tif	CTL	4	499.389	0.158193	VC2903
38	15.tif	CTL	5	368.716	0.10306	VC2903
67	16.tif	CTL	6	294.746	0.227314	VC2903
33	32.tif	CTL	7	231.293	0.142676	VC2903
23	34.tif	CTL	8	113.005	0.203531	VC2903
41	35.tif	CTL	9	215.072	0.190634	VC2903
28	37.tif	CTL	10	137.16	0.204141	VC2903
27	38.tif	CTL	11	162.039	0.166627	VC2903
34	39.tif	CTL	12	390.352	0.0871009	VC2903
57	22.tif	sh1826	13	492.957	0.115629	VC2903
25	23.tif	sh1826	14	110.152	0.226959	VC2903
23	24.tif	sh1826	15	493.78	0.0465795	VC2903
49	25.tif	sh1826	16	271.777	0.180295	VC2903
26	26.tif	sh1826	17	180.053	0.144402	VC2903
25	28.tif	sh1826	19	490.663	0.0509515	VC2903
117	29.tif	sh1826	20	842.125	0.138934	VC2903
30	30.tif	sh1826	21	168.496	0.178045	VC2903
28	31.tif	sh1826	22	206.074	0.135874	VC2903
55	5.tif	sh1826	24	541.671	0.101538	VC2903
35	7.tif	sh1826	26	274.404	0.127549	VC2903
32	8.tif	sh1826	27	394.239	0.0811691	VC2903
38	9.tif	sh1826	28	209.487	0.181396	VC2903
22	17.tif	shARL13b_2	29	178.911	0.122966	VC2903
36	19.tif	shARL13b_2	31	384.335	0.0936684	VC2903
35	20.tif	shARL13b_2	32	315.915	0.110789	VC2903
74	21.tif	shARL13b_2	33	433.342	0.170766	VC2903
74	40.tif	shARL13b_2	34	370.988	0.199467	VC2903
45	41.tif	shARL13b_2	35	281.593	0.159805	VC2903
70	42.tif	shARL13b_2	36	298.509	0.234499	VC2903
34	43.tif	shARL13b_2	37	225.799	0.150577	VC2903
31	44.tif	shARL13b_2	38	203.444	0.152376	VC2903
