# Supplementary material for: Ciliary neuropeptidergic signaling dynamically regulates excitatory synapses in postnatal neocortical pyramidal neurons
Source: eLife. 2021 Mar 2;10:e65427. doi: 10.7554/eLife.65427 (PMC7952091; doi:10.7554/eLife.65427)
Supplement: Figure 3—source data 1. [file elife-65427-fig3-data1.xlsx]

## Sheet: Figure_3A
Cell	Treatment	Dissociation	AVG_AmpY
Cell_11	CTL	VC2658	11.9659
Cell_07	CTL	VC2661	9.96986
Cell_12	CTL	VC2680	10.79
Cell_04	CTL	VC2682	9.96279
Cell_03	CTL	VC2683	8.60439
Cell_08	CTL	VC2810	10.4781
Cell_04	CTL	VC2836	9.82943
Cell_07	CTL	VC2836	10.8902
Cell_02	CTL	VC2838	9.06302
Cell_04	CTL	VC2838	10.3653
Cell_02	CTL	VC2839	11.5619
Cell_05	CTL	VC2839	9.26081
Cell_01	CTL	VC2840	12.8268
Cell_05	CTL	VC2840	12.4403
Cell_03	CTL	VC2842	10.2529
Cell_06	CTL	VC2842	11.8312
Cell_10	CTL	VC2842	10.948
Cell_11	CTL	VC2842	12.4924
Cell_02	CTL	VC2843	9.67216
Cell_03	CTL	VC2843	11.5057
Cell_01	CTL	VC2845	13.2285
Cell_02	CTL	VC2845	8.69067
Cell_13	CTL	VC2845	9.18102
Cell_05	CTL	VC2848	9.49293
Cell_12	shARL13b_1	VC2658	10.4212
Cell_12	shARL13b_1	VC2661	12.336
Cell_05	shARL13b_1	VC2680	13.8722
Cell_07	shARL13b_1	VC2681	11.301
Cell_10	shARL13b_1	VC2681	11.314
Cell_02	shARL13b_1	VC2682	16.4448
Cell_05	shARL13b_1	VC2682	10.424
Cell_08	shARL13b_1	VC2682	15.1111
Cell_13	shARL13b_1	VC2683	9.81747
Cell_15	shARL13b_1	VC2683	10.5956
Cell_17	shARL13b_1	VC2683	12.0107
Cell_01	shARL13b_1	VC2842	10.0068
Cell_02	shARL13b_1	VC2842	10.2745
Cell_07	shARL13b_1	VC2842	12.472
Cell_08	shARL13b_1	VC2842	12.2299
Cell_09	shARL13b_1	VC2842	14.0091
Cell_13	shARL13b_1	VC2842	12.9057
Cell_14	shARL13b_1	VC2842	16.7458
Cell_01	shARL13b_1	VC2843	11.0889
Cell_04	shARL13b_1	VC2843	13.0488
Cell_09	shARL13b_1	VC2843	11.8591
Cell_15	shARL13b_1	VC2845	10.4281
Cell_08	shARL13b_1	VC2848	10.8339
Cell_09	shARL13b_1	VC2848	11.6738
Cell_04	shARL13b_2	VC2810	13.9217
Cell_06	shARL13b_2	VC2836	9.99501
Cell_09	shARL13b_2	VC2836	10.9636
Cell_04	shARL13b_2	VC2837	16.8918
Cell_09	shARL13b_2	VC2837	13.6084
Cell_06	shARL13b_2	VC2838	10.2987
Cell_03	shARL13b_2	VC2839	12.2048
Cell_06	shARL13b_2	VC2839	10.3953
Cell_07	shARL13b_2	VC2839	13.5949
Cell_06	shARL13b_2	VC2840	14.0089
Cell_09	shARL13b_2	VC2840	14.0534
Cell_04	shARL13b_2	VC2842	11.3924
Cell_12	shARL13b_2	VC2842	13.6375
Cell_05	shARL13b_2	VC2843	11.6201
Cell_06	shARL13b_2	VC2843	10.3045
Cell_07	shARL13b_2	VC2845	11.1827
Cell_09	shARL13b_2	VC2845	13.4032
Cell_10	shARL13b_2	VC2845	11.1727
Cell_11	shARL13b_2	VC2845	10.2337
Cell_12	shARL13b_2	VC2845	10.6108
Cell_01	shARL13b_2	VC2848	15.5019
Cell_02	shARL13b_2	VC2848	11.1187
Cell_07	shARL13b_2	VC2848	11.8495

## Sheet: Figure_3B_C
Cell	Recording	M_strtX	M_pkX	M_pkY	M_base	M_rise	M_endX	M_decay	M_HW	M_HR	M_area	Treatment	Dissociation	Abs_AmpY	IMI_Manual_calc	IMI_Manual
Cell_11	1	5707.25	5708.77	-9.80001	-32.1739	0.626637	5715.15	0	3.49988	5707.91	-40.2704	CTL	VC2658	9.80001	227.08	227.08
Cell_11	1	8900.41	8902.57	-9.12378	-30.8236	1.79883	8912.23	0	3.64123	8901.82	-38.34	CTL	VC2658	9.12378	418.88	418.88
Cell_11	2	1698.06	1701.77	-9.02309	-32.56	1.85832	1708.57	0	2.841	1700.5	-30.8684	CTL	VC2658	9.02309	1698.06	1698.06
Cell_11	2	12413	12416.7	-6.17126	-31.6824	1.01694	12420.4	0	4.01372	12414.4	-19.6273	CTL	VC2658	6.17126	3482.51	3482.51
Cell_11	2	19455	19456.3	-19.174	-36.3863	0.482434	19468.2	0	3.17898	19455.8	-78.8345	CTL	VC2658	19.174	1026.1	1026.1
Cell_11	3	1407.27	1408.05	-7.04369	-30.737	0.325933	1416.26	0	1.72764	1407.8	-22.2326	CTL	VC2658	7.04369	1407.27	1407.27
Cell_11	3	7020.92	7023.24	-6.63681	-28.4826	0.357602	7029.14	0	3.48803	7021.47	-32.7144	CTL	VC2658	6.63681	1516.47	1516.47
Cell_11	3	15833.6	15836.4	-9.39289	-27.0875	1.45819	15843	0	2.00768	15835.4	-24.8089	CTL	VC2658	9.39289	341.4	341.4
Cell_11	3	19085.2	19086.8	-8.00403	-27.567	0.471072	19099.4	0	3.01464	19086.4	-33.8832	CTL	VC2658	8.00403	323.6	323.6
Cell_11	4	8061.62	8064.98	-8.3826	-27.634	1.11149	8069.67	0	3.05645	8063.84	-27.7011	CTL	VC2658	8.3826	2429.62	2429.62
Cell_11	4	13780	13782.6	-14.7918	-28.2136	0.645669	13792.7	0	4.35821	13781.6	-78.2283	CTL	VC2658	14.7918	1032.8	1032.8
Cell_11	5	6691.95	6695.13	-7.60856	-26.9004	1.20247	6702.12	0	3.47445	6694.41	-31.5715	CTL	VC2658	7.60856	691.35	691.35
Cell_11	5	15987.4	15989.4	-11.8179	-27.2626	1.19294	15995.6	0	4.38265	15988	-48.7276	CTL	VC2658	11.8179	348.8	348.8
Cell_11	5	19189.4	19193.6	-14.5358	-28.5731	1.87437	19207.4	0	5.20034	19192.7	-96.9239	CTL	VC2658	14.5358	1267	1267
Cell_11	6	7194.53	7196.8	-8.02897	-29.3487	0.771349	7200.11	0	2.36599	7195.7	-23.0777	CTL	VC2658	8.02897	2887.11	2887.11
Cell_11	6	15435.3	15436.5	-16.7801	-28.1112	0.715107	15447.8	0	4.15217	15436	-81.5234	CTL	VC2658	16.7801	1763.1	1763.1
Cell_11	7	1843.87	1847.54	-21.4193	-29.0808	0.648606	1858.37	0	4.22384	1846.19	-108.26	CTL	VC2658	21.4193	1843.87	1843.87
Cell_11	7	14986.1	14987.9	-9.32307	-27.2064	1.1607	14995.9	0	2.03761	14987.4	-30.0021	CTL	VC2658	9.32307	1994.5	1994.5
Cell_11	9	5845.07	5849.34	-19.5583	-28.58	0.471044	5861.24	0	3.99477	5848.43	-98.9575	CTL	VC2658	19.5583	983.51	983.51
Cell_11	9	13825	13825.7	-10.6995	-27.3372	0.300239	13836	0	4.87986	13825.5	-53.9211	CTL	VC2658	10.6995	994	994
Cell_11	10	7359.94	7364.16	-18.5256	-25.8892	0.715063	7377.1	0	4.28835	7363.39	-93.8299	CTL	VC2658	18.5256	1112.85	1112.85
Cell_11	10	13174.6	13175.7	-7.63958	-26.9001	0.332068	13184.5	0	3.53806	13175.4	-36.5191	CTL	VC2658	7.63958	400.6	400.6
Cell_11	10	17011.4	17013.3	-31.9672	-25.7413	0.548963	17032.5	0	3.29897	17012.6	-163.828	CTL	VC2658	31.9672	1639.3	1639.3
Cell_12	1	4290.13	4291.13	-10.5355	-28.5694	0.369998	4298.47	0	1.96384	4290.87	-24.8552	shARL13b_1	VC2658	10.5355	3617.36	3617.36
Cell_12	1	6230.15	6233.84	-13.6942	-28.8961	0.392521	6245.42	0	1.77198	6233.63	-39.1702	shARL13b_1	VC2658	13.6942	458.92	458.92
Cell_12	1	7866.13	7867.03	-11.4754	-29.7597	0.602669	7872.13	0	1.80403	7866.72	-25.694	shARL13b_1	VC2658	11.4754	1382.01	1382.01
Cell_12	1	8573.38	8575.86	-9.2276	-29.8226	0.4687	8581.18	0	2.22498	8575.58	-24.7994	shARL13b_1	VC2658	9.2276	692.36	692.36
Cell_12	1	10939.7	10940.7	-15.0474	-28.9161	0.471059	10949.6	0	2.26907	10940.2	-54.8737	shARL13b_1	VC2658	15.0474	1271.3	1271.3
Cell_12	1	11133.6	11134.6	-7.19319	-29.6902	0.297195	11142.4	0	2.5674	11134.1	-26.0896	shARL13b_1	VC2658	7.19319	193.9	193.9
Cell_12	1	12261.1	12263.9	-7.15115	-28.737	1.2341	12267.3	0	1.60506	12263.2	-14.5752	shARL13b_1	VC2658	7.15115	1127.5	1127.5
Cell_12	1	12958.3	12959.8	-8.21362	-29.0786	0.938631	12971	0	5.27407	12959.2	-43.4775	shARL13b_1	VC2658	8.21362	650.4	650.4
Cell_12	1	14876.6	14877.3	-5.66886	-29.1943	0.333536	14884.3	0	3.49185	14877.1	-21.4156	shARL13b_1	VC2658	5.66886	1918.3	1918.3
Cell_12	1	16963.4	16965.2	-5.89426	-29.0972	0.890124	16973.6	0	3.28629	16964	-25.5289	shARL13b_1	VC2658	5.89426	2086.8	2086.8
Cell_12	2	1442.69	1444.44	-14.9931	-29.1776	0.478595	1449.95	0	1.66328	1444	-33.2991	shARL13b_1	VC2658	14.9931	1442.69	1442.69
Cell_12	2	2124.79	2126.67	-12.0979	-29.4304	0.543123	2133.43	0	2.99072	2126.04	-41.0034	shARL13b_1	VC2658	12.0979	104.77	104.77
Cell_12	2	2410.98	2413.8	-5.66486	-28.8077	1.97707	2429.51	0	4.96738	2411.73	-51.5811	shARL13b_1	VC2658	5.66486	286.19	286.19
Cell_12	2	2771.8	2774.51	-12.0832	-27.9921	0.75742	2782.42	0	2.91935	2773.95	-43.0904	shARL13b_1	VC2658	12.0832	360.82	360.82
Cell_12	2	5401.98	5402.65	-17.2574	-28.6408	0.321817	5408.85	0	1.66595	5402.62	-36.7249	shARL13b_1	VC2658	17.2574	878.98	878.98
Cell_12	2	7433.77	7436.54	-9.23295	-29.7439	0.784967	7447.22	0	4.02069	7435.65	-51.8446	shARL13b_1	VC2658	9.23295	1876.91	1876.91
Cell_12	2	10010.4	10014.1	-5.88162	-30.2145	0.732846	10019.9	0	2.54505	10013.2	-24.0438	shARL13b_1	VC2658	5.88162	409.29	409.29
Cell_12	2	12921.7	12923	-11.7025	-30.4301	0.374011	12933.2	0	2.55422	12922.6	-39.2616	shARL13b_1	VC2658	11.7025	1938.6	1938.6
Cell_12	2	13527.1	13531	-21.7952	-29.8339	0.545385	13546.8	0	2.38896	13530.6	-104.675	shARL13b_1	VC2658	21.7952	605.4	605.4
Cell_12	2	13841.8	13846.3	-9.00148	-30.2378	0.83297	13852.7	0	1.8016	13845.5	-20.1965	shARL13b_1	VC2658	9.00148	314.7	314.7
Cell_12	2	17450.6	17452.4	-6.68178	-33.5829	0.403003	17461.4	0	2.70914	17452.1	-22.2331	shARL13b_1	VC2658	6.68178	2273.7	2273.7
Cell_12	2	19382.4	19384.8	-21.6978	-32.4337	0.478583	19390.6	0	1.97686	19384.3	-45.35	shARL13b_1	VC2658	21.6978	1931.8	1931.8
Cell_12	2	19909.2	19913.4	-7.69214	-31.5594	1.14473	19919.5	0	2.20962	19912.3	-25.7622	shARL13b_1	VC2658	7.69214	345.2	345.2
Cell_07	1	2587.59	2588.55	-7.25959	-33.8899	0.405191	2595.5	0	2.49213	2588.21	-21.1026	CTL	VC2661	7.25959	238.97	238.97
Cell_07	1	4123.96	4125.17	-8.47817	-33.4954	0.386469	4132.15	0	3.09944	4124.54	-34.4976	CTL	VC2661	8.47817	1008.14	1008.14
Cell_07	1	4205.16	4205.95	-10.195	-33.2132	0.451756	4214.62	0	1.99237	4205.62	-33.1277	CTL	VC2661	10.195	81.2	81.2
Cell_07	1	4994.88	4997.35	-12.5552	-33.0071	1.41298	5008.73	0	3.57155	4995.86	-59.3574	CTL	VC2661	12.5552	789.72	789.72
Cell_07	1	5246.74	5247.89	-8.09436	-32.3654	0.621237	5254.21	0	2.18837	5247.36	-24.9203	CTL	VC2661	8.09436	251.86	251.86
Cell_07	1	7253.65	7256.99	-11.4948	-30.8143	0.602961	7264.37	0	3.57979	7256.16	-40.9689	CTL	VC2661	11.4948	937.74	937.74
Cell_07	1	9615.96	9619.39	-8.85855	-29.8257	0.522582	9627.45	0	2.82457	9618.82	-30.7416	CTL	VC2661	8.85855	2362.31	2362.31
Cell_07	1	13299.7	13302.1	-20.1583	-27.7355	0.692951	13321.2	0	4.6273	13300.5	-115.691	CTL	VC2661	20.1583	2751.3	2751.3
Cell_07	1	13738	13740.8	-16.0064	-28.0854	0.598318	13751	0	3.8943	13739.8	-74.323	CTL	VC2661	16.0064	388.6	388.6
Cell_07	1	17399.5	17401	-13.5002	-25.9404	0.54681	17413.3	0	2.67364	17400.7	-51.3508	CTL	VC2661	13.5002	3661.5	3661.5
Cell_07	1	17806.7	17810.5	-7.29402	-26.5863	1.26655	17823.5	0	4.02985	17809.3	-41.0636	CTL	VC2661	7.29402	407.2	407.2
Cell_07	1	18315.4	18318.8	-6.47379	-25.2828	1.71027	18325	0	3.13424	18317.3	-22.8026	CTL	VC2661	6.47379	508.7	508.7
Cell_07	2	534.683	536.866	-9.43548	-21.9059	1.2622	551.492	0	5.8299	535.639	-61.5979	CTL	VC2661	9.43548	534.68	534.683
Cell_07	2	646.257	649.238	-6.18598	-22.2376	1.16701	656.117	0	3.03672	647.766	-24.8974	CTL	VC2661	6.18598	111.57	111.574
Cell_07	2	4704.23	4708.22	-9.18177	-19.3458	1.64678	4715.04	0	4.18846	4706.88	-35.4095	CTL	VC2661	9.18177	4057.97	4057.97
Cell_07	2	7618.77	7620.09	-9.71333	-18.8875	0.457941	7630.15	0	2.47319	7619.28	-36.6079	CTL	VC2661	9.71333	166.46	166.46
Cell_07	2	8655	8655.84	-10.1934	-18.4257	0.482456	8665.32	0	3.25798	8655.56	-42.6004	CTL	VC2661	10.1934	1036.23	1036.23
Cell_07	2	10357.5	10361.6	-6.13445	-17.7607	1.43436	10369.4	0	3.59528	10360.8	-24.402	CTL	VC2661	6.13445	1702.5	1702.5
Cell_07	2	10437.2	10441.2	-6.32089	-17.8857	1.39631	10452.7	0	6.65172	10439.2	-47.3119	CTL	VC2661	6.32089	79.7	79.7
Cell_07	2	14016.5	14017.5	-5.93684	-17.3601	0.635251	14026.9	0	2.47809	14017	-23.7882	CTL	VC2661	5.93684	3579.3	3579.3
Cell_07	2	14425.3	14428.8	-5.26993	-17.3799	0.568028	14440.4	0	3.54509	14428.6	-33.3338	CTL	VC2661	5.26993	408.8	408.8
Cell_07	3	5924.14	5927.32	-6.74562	-13.1944	2.11142	5935.11	0	3.8935	5926.93	-26.4801	CTL	VC2661	6.74562	5305.69	5305.69
Cell_07	3	19909.1	19911	-8.50101	-12.4951	0.379711	19919.1	0	4.0975	19909.8	-39.936	CTL	VC2661	8.50101	13985	13985
Cell_12	1	5425.12	5429.04	-8.34772	-19.1296	0.531001	5436.13	0	2.85357	5428.71	-26.8867	shARL13b_1	VC2661	8.34772	910.37	910.369
Cell_12	1	12284.5	12285.7	-11.822	-20.0323	0.443108	12294.3	0	2.09128	12285.1	-46.5895	shARL13b_1	VC2661	11.822	5761.25	5761.25
Cell_12	2	3329.91	3330.97	-8.9043	-20.7097	0.680605	3335.39	0	1.67683	3330.57	-21.3144	shARL13b_1	VC2661	8.9043	3329.91	3329.91
Cell_12	3	995.376	996.551	-9.55898	-18.8644	0.796262	999.674	0	2.2376	995.972	-19.9744	shARL13b_1	VC2661	9.55898	995.38	995.376
Cell_12	3	7387.97	7389.55	-6.98019	-16.9209	0.803967	7392.63	0	1.78222	7389.02	-12.6572	shARL13b_1	VC2661	6.98019	2072.05	2072.05
Cell_12	3	12810.8	12812.6	-26.9768	-17.6513	0.544494	12818.5	0	2.72983	12811.5	-80.4989	shARL13b_1	VC2661	26.9768	5422.85	5422.85
Cell_12	3	16200.1	16202.1	-19.2044	-17.8072	0.643162	16218	0	3.73897	16201	-118.217	shARL13b_1	VC2661	19.2044	844.28	844.28
Cell_12	4	2177.96	2178.86	-12.5995	-21.9096	0.361154	2187.57	0	2.17054	2178.67	-49.7253	shARL13b_1	VC2661	12.5995	657.53	657.531
Cell_12	4	8151.73	8152.96	-20.237	-16.3841	0.489376	8160.7	0	2.99155	8152.44	-64.4164	shARL13b_1	VC2661	20.237	1048.32	1048.32
Cell_12	4	10004.9	10007.1	-8.19997	-16.5371	0.675093	10013.5	0	2.57735	10006.5	-20.8445	shARL13b_1	VC2661	8.19997	1652.62	1652.62
Cell_12	4	15377.2	15378	-9.94399	-17.3568	0.329012	15383	0	3.01928	15377.7	-26.7231	shARL13b_1	VC2661	9.94399	1185.5	1185.5
Cell_12	4	19480.1	19482.5	-8.21582	-17.9861	0.371905	19487.4	0	2.0745	19482.3	-20.3669	shARL13b_1	VC2661	8.21582	1173.29	1173.29
Cell_12	6	3260.15	3261.18	-7.40553	-21.0488	0.335207	3274.14	0	3.69721	3260.98	-48.9277	shARL13b_1	VC2661	7.40553	3260.15	3260.15
Cell_12	6	15682.5	15685.9	-8.42571	-20.102	1.93514	15712.9	0	6.16986	15683.4	-68.3236	shARL13b_1	VC2661	8.42571	3117.9	3117.9
Cell_12	6	18835.3	18837.5	-24.0104	-20.362	0.607354	18845.6	0	3.24676	18836.8	-79.1233	shARL13b_1	VC2661	24.0104	1920.43	1920.43
Cell_12	7	17610.1	17611.8	-13.569	-21.2881	0.77106	17615.5	0	2.37391	17611.4	-31.8043	shARL13b_1	VC2661	13.569	6069.18	6069.18
Cell_12	8	5546.5	5547.61	-22.9285	-21.7002	0.48349	5558.08	0	2.79565	5547.3	-78.9446	shARL13b_1	VC2661	22.9285	962.3	962.299
Cell_12	8	11613.7	11615.3	-6.36093	-21.3186	1.03311	11624.5	0	2.42862	11614.3	-29.66	shARL13b_1	VC2661	6.36093	694.99	694.995
Cell_12	8	16573.7	16575.5	-17.4789	-19.4408	0.654965	16584.5	0	2.64613	16574.6	-61.5881	shARL13b_1	VC2661	17.4789	3303.94	3303.94
Cell_12	9	9940.45	9941.31	-16.1004	-20.1238	0.309834	9956.06	0	2.34858	9941	-71.3685	shARL13b_1	VC2661	16.1004	4349.58	4349.58
Cell_12	9	16435.1	16436.7	-11.3309	-19.4243	0.499294	16444.3	0	2.84469	16435.7	-40.8028	shARL13b_1	VC2661	11.3309	5677.69	5677.69
Cell_12	10	2912.49	2913.67	-8.0398	-20.628	0.574831	2921.56	0	2.60817	2913.22	-30.0727	shARL13b_1	VC2661	8.0398	2912.49	2912.49
Cell_12	10	16883.5	16886.6	-6.24183	-18.9167	0.902612	16892.5	0	2.60789	16884.9	-19.5278	shARL13b_1	VC2661	6.24183	13702.5	13702.5
Cell_12	1	10671	10672.9	-10.0192	-63.5583	0.863205	10683.6	0	5.36915	10671.9	-55.3593	CTL	VC2680	10.0192	248.9	248.9
Cell_12	1	17218.3	17222.9	-9.35371	-58.267	1.78369	17232.4	0	3.58505	17221.3	-38.8493	CTL	VC2680	9.35371	353.5	353.5
Cell_12	2	7388.71	7391.15	-10.2189	-53.7276	1.12797	7401.04	0	3.8024	7390.32	-52.8836	CTL	VC2680	10.2189	597.35	597.35
Cell_12	2	13539.3	13546	-10.6214	-48.6497	0.611059	13553.3	0	4.65344	13545.2	-46.6822	CTL	VC2680	10.6214	395.9	395.9
Cell_12	3	2688.79	2692.13	-20.2256	-44.9354	1.09973	2707.6	0	4.98927	2690.39	-130.802	CTL	VC2680	20.2256	929.78	929.78
Cell_12	3	10992.5	10997.8	-8.78571	-43.088	0.860987	11005.4	0	3.97069	10996.6	-45.5683	CTL	VC2680	8.78571	628.2	628.2
Cell_12	3	15577.2	15581.7	-11.7393	-39.5299	1.98587	15599.3	0	3.88229	15580.2	-91.07	CTL	VC2680	11.7393	286.1	286.1
Cell_12	4	6353.66	6355.81	-9.58922	-38.7018	0.888656	6364.06	0	3.77084	6354.74	-39.7044	CTL	VC2680	9.58922	2243.29	2243.29
Cell_12	4	9797.26	9799.15	-8.04471	-35.7904	1.00493	9810.97	0	5.96873	9798.26	-45.1123	CTL	VC2680	8.04471	267.73	267.73
Cell_12	5	1569.02	1572.41	-14.1981	-34.111	2.35985	1580.8	0	6.26558	1570.16	-88.2175	CTL	VC2680	14.1981	316.77	316.77
Cell_12	5	9332.87	9334.27	-11.0979	-31.3214	0.807367	9342.28	0	3.00663	9333.58	-41.2411	CTL	VC2680	11.0979	2412.35	2412.35
Cell_12	6	6308.85	6310.62	-8.10978	-27.553	0.884234	6317.59	0	3.10776	6310.05	-24.1974	CTL	VC2680	8.10978	178.13	178.13
Cell_12	6	11588.8	11590.7	-11.536	-27.319	1.29024	11601.7	0	6.29747	11589.8	-74.2737	CTL	VC2680	11.536	108.4	108.4
Cell_12	6	18151.1	18153.9	-8.17118	-24.7206	0.729117	18165.3	0	5.48088	18153.2	-47.348	CTL	VC2680	8.17118	331.1	331.1
Cell_12	7	7610.68	7612.1	-7.41327	-25.4113	1.00293	7619.32	0	4.53749	7611.39	-38.7671	CTL	VC2680	7.41327	70.55	70.55
Cell_12	7	13983.8	13986.5	-14.7338	-23.6691	0.922291	14000.1	0	4.86842	13985	-84.6071	CTL	VC2680	14.7338	265.7	265.7
Cell_12	8	5618.89	5622.59	-8.32401	-22.785	2.39519	5628.93	0	3.96777	5619.8	-40.3703	CTL	VC2680	8.32401	377.28	377.28
Cell_12	8	15806.7	15808.6	-8.61362	-22.1666	1.1899	15817.2	0	7.66509	15807.3	-42.9855	CTL	VC2680	8.61362	181.2	181.2
Cell_12	9	5701.47	5703.37	-11.8535	-20.5012	0.804851	5714.31	0	4.59559	5702.21	-66.1272	CTL	VC2680	11.8535	1244.79	1244.79
Cell_12	9	14487.2	14490	-8.12861	-21.1862	2.18246	14507.9	0	3.83718	14488.3	-63.6015	CTL	VC2680	8.12861	182.4	182.4
Cell_12	9	19844.9	19846.2	-8.21461	-20.1541	0.62344	19854.3	0	2.64466	19845.8	-25.2949	CTL	VC2680	8.21461	103.4	103.4
Cell_12	10	7212.5	7215	-9.18155	-19.737	1.6932	7225.21	0	4.33508	7213.37	-49.6691	CTL	VC2680	9.18155	145.13	145.13
Cell_12	10	15661.8	15665.1	-7.9853	-18.2964	0.983554	15670.9	0	2.73879	15664.6	-26.9248	CTL	VC2680	7.9853	469.2	469.2
Cell_05	1	8741.69	8744.01	-8.81096	-127.413	1.7788	8765.12	0	6.32643	8742.34	-65.289	shARL13b_1	VC2680	8.81096	4668.25	4668.25
Cell_05	2	19505.5	19509.3	-7.69984	-118.667	1.36197	19512.6	0	3.07231	19508	-18.5981	shARL13b_1	VC2680	7.69984	19505.5	19505.5
Cell_05	3	6955.43	6959.46	-10.5517	-119.691	1.94952	6969.11	0	4.09576	6958.41	-64.7424	shARL13b_1	VC2680	10.5517	6955.43	6955.43
Cell_05	3	16264.5	16265.5	-19.1897	-118.121	0.408978	16271.5	0	3.28677	16265.1	-63.5532	shARL13b_1	VC2680	19.1897	16264.5	16264.5
Cell_05	4	10260.4	10264	-11.7771	-115.017	1.88648	10274.4	0	5.70633	10262.8	-62.3018	shARL13b_1	VC2680	11.7771	10260.4	10260.4
Cell_05	6	4043.5	4045.39	-15.87	-107.226	0.558562	4058.94	0	3.43308	4044.94	-78.1273	shARL13b_1	VC2680	15.87	4043.5	4043.5
Cell_05	6	9013.63	9016.95	-24.2101	-106.826	0.5738	9029.91	0	4.24345	9016.28	-145.802	shARL13b_1	VC2680	24.2101	9013.63	9013.63
Cell_05	6	15368.5	15370.2	-8.29589	-105.785	1.17399	15375.4	0	1.57323	15369.6	-20.0803	shARL13b_1	VC2680	8.29589	15368.5	15368.5
Cell_05	6	17064.6	17066.5	-16.132	-108.764	0.777343	17080.7	0	5.55986	17065.5	-107.301	shARL13b_1	VC2680	16.132	1696.1	1696.1
Cell_05	7	1623.74	1627.19	-13.1854	-104.539	2.05992	1642.97	0	5.86778	1625.92	-100.589	shARL13b_1	VC2680	13.1854	1623.74	1623.74
Cell_05	8	3463.38	3465.73	-21.3879	-103.3	0.66377	3478.79	0	4.75921	3464.2	-136.886	shARL13b_1	VC2680	21.3879	3463.38	3463.38
Cell_05	8	3793.45	3795.25	-33.73	-102.03	0.802828	3817.71	0	6.62129	3794.64	-256.674	shARL13b_1	VC2680	33.73	3793.45	3793.45
Cell_05	8	5176.13	5181.1	-21.6457	-102.664	1.47161	5200.36	0	7.03867	5178.14	-181.201	shARL13b_1	VC2680	21.6457	1382.68	1382.68
Cell_05	8	16536.6	16540.9	-19.8303	-102.13	1.52063	16566.6	0	5.99428	16538	-151.537	shARL13b_1	VC2680	19.8303	5830.5	5830.5
Cell_05	9	1274.51	1276.28	-7.82802	-103.61	1.22543	1285.62	0	3.79299	1275.2	-43.4518	shARL13b_1	VC2680	7.82802	1274.51	1274.51
Cell_05	9	6372.58	6375.01	-13.0694	-99.9128	0.777971	6391.59	0	4.65895	6373.89	-81.88	shARL13b_1	VC2680	13.0694	6372.58	6372.58
Cell_05	12	10527.2	10529.8	-28.5716	-95.0368	0.925583	10542.7	0	5.59058	10528.5	-183.729	shARL13b_1	VC2680	28.5716	10527.2	10527.2
Cell_05	23	17573.2	17576.8	-11.0346	-94.8365	0.877633	17593.3	0	8.55041	17574.9	-101.734	shARL13b_1	VC2680	11.0346	17573.2	17573.2
Cell_05	24	6835.15	6837.29	-17.2308	-95.4461	0.825838	6848.86	0	5.27482	6836.42	-91.5226	shARL13b_1	VC2680	17.2308	6835.15	6835.15
Cell_05	26	7417.96	7419.34	-9.35142	-87.4862	0.808749	7426.22	0	5.68752	7418.72	-42.247	shARL13b_1	VC2680	9.35142	7417.96	7417.96
Cell_05	27	6215.29	6217.65	-9.80138	-87.5983	1.47696	6231.88	0	5.90234	6216.87	-63.4778	shARL13b_1	VC2680	9.80138	6215.29	6215.29
Cell_05	27	6971.75	6974.46	-5.5891	-88.6612	0.829557	6982.39	0	3.82206	6972.63	-33.0314	shARL13b_1	VC2680	5.5891	756.46	756.46
Cell_05	27	16576.5	16579.1	-7.75696	-88.3001	2.25638	16595	0	2.64165	16577.4	-47.7218	shARL13b_1	VC2680	7.75696	9604.75	9604.75
Cell_07	2	2023.29	2029.09	-27.948	-59.1797	2.27949	2049.52	0	9.07094	2026.23	-286.657	shARL13b_1	VC2681	27.948	594.25	594.25
Cell_07	2	12208.4	12210.9	-10.8608	-55.3071	0.862583	12215.1	0	2.0043	12209.9	-31.1459	shARL13b_1	VC2681	10.8608	9691.59	9691.59
Cell_07	2	17971.9	17973.5	-16.1369	-50.5255	0.789132	17977.9	0	2.15767	17973.2	-36.1611	shARL13b_1	VC2681	16.1369	5763.5	5763.5
Cell_07	3	19050.6	19051.6	-11.6447	-44.2145	0.384805	19057.5	0	2.09649	19051.3	-28.0649	shARL13b_1	VC2681	11.6447	19050.6	19050.6
Cell_07	4	9639.64	9642.79	-7.15561	-46.4697	0.334881	9656.02	0	2.5969	9642.6	-47.8285	shARL13b_1	VC2681	7.15561	1378.23	1378.23
Cell_07	5	10805.5	10806.3	-8.24003	-45.6355	0.599238	10811.5	0	1.86408	10806	-21.7612	shARL13b_1	VC2681	8.24003	6713.98	6713.98
Cell_07	6	5956.03	5957.11	-13.2312	-44.9901	0.378687	5965.43	0	2.24869	5956.94	-47.7406	shARL13b_1	VC2681	13.2312	5956.03	5956.03
Cell_07	6	6788.09	6790.1	-6.88262	-44.3074	0.62618	6794.83	0	2.28866	6788.72	-19.4742	shARL13b_1	VC2681	6.88262	832.06	832.06
Cell_07	7	7111.96	7116.82	-7.76068	-41.7935	2.69656	7122.21	0	2.31197	7116	-25.9099	shARL13b_1	VC2681	7.76068	7111.96	7111.96
Cell_07	8	12104.7	12107	-8.90284	-40.8343	0.433439	12115.8	0	2.39073	12106.3	-28.3404	shARL13b_1	VC2681	8.90284	9542.89	9542.89
Cell_07	8	13969.5	13972.7	-8.67455	-40.8312	0.644037	13976.4	0	2.96793	13972.2	-19.4762	shARL13b_1	VC2681	8.67455	1864.8	1864.8
Cell_07	9	8401.65	8407.5	-18.3424	-41.2093	1.25199	8435.05	0	9.84731	8404.11	-200.046	shARL13b_1	VC2681	18.3424	8401.65	8401.65
Cell_07	10	11335.4	11336.4	-20.7201	-36.6284	0.563559	11348.5	0	2.23952	11336	-63.7805	shARL13b_1	VC2681	20.7201	6347.8	6347.8
Cell_07	11	8925.04	8926.57	-5.92567	-38.2756	0.31021	8933.06	0	2.77298	8925.48	-19.4343	shARL13b_1	VC2681	5.92567	3308.56	3308.56
Cell_07	11	11123	11123.6	-10.3963	-35.685	0.354444	11130.9	0	2.69458	11123.6	-34.2695	shARL13b_1	VC2681	10.3963	2197.96	2197.96
Cell_07	13	4733.91	4736.82	-7.6412	-33.5148	1.57249	4749.16	0	8.06037	4735.43	-61.1266	shARL13b_1	VC2681	7.6412	3180.3	3180.3
Cell_07	13	10485	10489.8	-15.1653	-32.6497	1.67175	10506.7	0	4.15474	10488.3	-99.0762	shARL13b_1	VC2681	15.1653	5751.09	5751.09
Cell_07	13	14091.7	14095.1	-9.68265	-33.9207	0.385462	14101.1	0	3.01058	14094.5	-34.0764	shARL13b_1	VC2681	9.68265	3606.7	3606.7
Cell_07	17	3188.04	3189.4	-9.36826	-32.63	0.554233	3201.39	0	3.47822	3188.65	-35.9829	shARL13b_1	VC2681	9.36826	3188.04	3188.04
Cell_07	17	3905.17	3908.22	-7.15903	-30.7557	1.49096	3913.23	0	3.04515	3907.19	-21.968	shARL13b_1	VC2681	7.15903	717.13	717.13
Cell_07	18	6431.25	6433.39	-8.99121	-32.1648	0.754264	6443.5	0	3.40917	6432.39	-31.8566	shARL13b_1	VC2681	8.99121	6431.25	6431.25
Cell_07	19	800.782	801.799	-12.5648	-30.4155	0.557029	813.668	0	2.8735	801.362	-50.8417	shARL13b_1	VC2681	12.5648	800.78	800.782
Cell_07	19	3551.02	3553.91	-9.20374	-31.067	0.778569	3562.06	0	3.13642	3553.07	-29.5385	shARL13b_1	VC2681	9.20374	2750.24	2750.24
Cell_10	1	19799.1	19804.4	-8.29296	-40.2111	1.64418	19812.6	0	5.15887	19803.4	-43.3107	shARL13b_1	VC2681	8.29296	19799.1	19799.1
Cell_10	2	17329.9	17332.7	-6.50795	-35.7341	2.01216	17347	0	5.98106	17330.5	-53.6761	shARL13b_1	VC2681	6.50795	17329.9	17329.9
Cell_10	3	4571.34	4573.26	-7.6901	-33.3925	1.45235	4586.75	0	6.9667	4572.09	-54.4174	shARL13b_1	VC2681	7.6901	4571.34	4571.34
Cell_10	3	10976.6	10978.5	-7.80038	-35.809	1.30095	10986.4	0	2.78773	10977.7	-32.3073	shARL13b_1	VC2681	7.80038	783.2	783.2
Cell_10	3	17635.4	17637.8	-9.62177	-33.719	1.75904	17648.6	0	3.88324	17636	-52.0098	shARL13b_1	VC2681	9.62177	6531.3	6531.3
Cell_10	4	7492.54	7495.13	-9.07457	-28.9011	0.729425	7504.11	0	4.06265	7493.47	-47.1115	shARL13b_1	VC2681	9.07457	7492.54	7492.54
Cell_10	4	17496	17499.2	-9.76582	-28.027	1.71087	17511.6	0	5.42073	17498.1	-56.7782	shARL13b_1	VC2681	9.76582	10003.5	10003.5
Cell_10	5	1699.8	1701.37	-8.27834	-27.0548	1.07551	1706.56	0	3.67651	1700.59	-32.2431	shARL13b_1	VC2681	8.27834	1699.8	1699.8
Cell_10	5	16887.9	16892.4	-25.1323	-25.5753	1.41921	16920.2	0	7.19081	16889	-218.764	shARL13b_1	VC2681	25.1323	15188.1	15188.1
Cell_10	8	13757.7	13759.6	-9.18863	-24.0204	1.25444	13772.6	0	5.59499	13758.7	-55.3385	shARL13b_1	VC2681	9.18863	13757.7	13757.7
Cell_10	8	15516.9	15519.9	-6.75631	-26.1901	1.23901	15528.4	0	3.28948	15517.9	-39.4589	shARL13b_1	VC2681	6.75631	1759.2	1759.2
Cell_10	9	18858.5	18861.3	-26.6786	-23.8708	1.12033	18878	0	6.63841	18859.4	-214.232	shARL13b_1	VC2681	26.6786	18858.5	18858.5
Cell_10	10	4757.74	4758.21	-6.12129	-24.0235	0.292692	4768.17	0	3.49957	4758.21	-26.5682	shARL13b_1	VC2681	6.12129	4757.74	4757.74
Cell_10	15	2795.07	2797.7	-7.78705	-19.6969	1.59188	2808.64	0	5.788	2796.05	-46.51	shARL13b_1	VC2681	7.78705	2795.07	2795.07
Cell_10	15	6686.81	6687.73	-5.66914	-20.7587	0.593145	6704.7	0	3.31969	6687.38	-37.696	shARL13b_1	VC2681	5.66914	1242.42	1242.42
Cell_10	15	7111.43	7114.02	-7.10715	-19.7361	0.438353	7121.93	0	3.71087	7111.92	-32.8912	shARL13b_1	VC2681	7.10715	424.62	424.62
Cell_10	16	7663.62	7665.48	-9.87198	-18.1365	1.44017	7678.43	0	5.62808	7664.23	-57.2636	shARL13b_1	VC2681	9.87198	7663.62	7663.62
Cell_10	16	8374.2	8377.11	-17.6417	-18.6496	1.63194	8392.42	0	5.98795	8375.84	-131.497	shARL13b_1	VC2681	17.6417	577.35	577.35
Cell_10	16	11030.8	11032.2	-13.8212	-17.8499	0.764758	11045.3	0	5.7879	11031.7	-79.0195	shARL13b_1	VC2681	13.8212	300	300
Cell_10	17	14533.9	14534.8	-9.22942	-17.8149	0.422481	14547	0	4.55704	14534.4	-51.2189	shARL13b_1	VC2681	9.22942	14533.9	14533.9
Cell_10	18	11163.4	11165.6	-15.9266	-16.9347	1.38811	11175.7	0	6.72365	11164.2	-96.6181	shARL13b_1	VC2681	15.9266	11163.4	11163.4
Cell_10	19	7636.32	7638.69	-8.4411	-17.2058	1.53224	7645.07	0	5.12624	7637.6	-37.9022	shARL13b_1	VC2681	8.4411	7636.32	7636.32
Cell_10	10	19817.3	19818.8	-10.5895	-21.9052	1.1095	19828.9	0	3.50199	19818.3	-56.5001	shARL13b_1	VC2681	10.5895	14991.7	14991.7
Cell_04	8	2671.5	2674.13	-8.23366	-43.7682	1.52162	2688.58	0	4.98451	2672.22	-57.0077	CTL	VC2682	8.23366	2671.5	2671.5
Cell_04	8	9197.9	9202.1	-12.6206	-40.6016	0.825883	9211.85	0	4.70479	9200.15	-64.7923	CTL	VC2682	12.6206	6526.4	6526.4
Cell_04	8	9291.22	9292.68	-9.84057	-42.381	0.898107	9307.26	0	3.0952	9292.27	-61.5653	CTL	VC2682	9.84057	93.32	93.32
Cell_04	8	15399.6	15403.1	-10.5826	-40.5035	1.26419	15416.2	0	4.88319	15402.3	-58.3415	CTL	VC2682	10.5826	6108.38	6108.38
Cell_04	8	16940.9	16942	-6.34561	-43.7396	0.382324	16952.9	0	3.2497	16941.3	-32.7818	CTL	VC2682	6.34561	1541.3	1541.3
Cell_04	9	12327.2	12328.7	-8.97018	-41.6522	0.638179	12339.9	0	2.32054	12327.9	-42.1086	CTL	VC2682	8.97018	12327.2	12327.2
Cell_04	10	2557.72	2558.96	-7.90719	-48.5992	0.716824	2574.5	0	3.20664	2558.47	-53.2743	CTL	VC2682	7.90719	2557.72	2557.72
Cell_04	10	6164.29	6166.26	-7.63658	-48.65	1.06281	6173.95	0	3.95297	6164.81	-35.1925	CTL	VC2682	7.63658	657.36	657.36
Cell_04	14	6650.37	6652.34	-9.75391	-43.6396	0.734467	6663.09	0	4.56261	6650.86	-60.7426	CTL	VC2682	9.75391	486.08	486.08
Cell_04	14	13730.8	13733.8	-11.8175	-43.7061	1.62869	13744.5	0	5.13409	13731.6	-66.397	CTL	VC2682	11.8175	7080.43	7080.43
Cell_04	15	7743.99	7747.66	-7.99172	-45.5543	2.8435	7761.63	0	6.69468	7744.91	-61.1528	CTL	VC2682	7.99172	7743.99	7743.99
Cell_04	15	10621.7	10627.1	-20.778	-44.8588	2.03057	10646.8	0	7.51867	10623.5	-195.388	CTL	VC2682	20.778	2877.71	2877.71
Cell_04	15	15484	15491.7	-10.6563	-45.2944	2.00219	15508.5	0	5.42588	15489.8	-75.7466	CTL	VC2682	10.6563	4862.3	4862.3
Cell_04	15	17183.5	17188.1	-6.31304	-45.7195	2.72438	17195.2	0	5.32474	17184.9	-34.4679	CTL	VC2682	6.31304	1699.5	1699.5
Cell_04	15	17532.9	17536.6	-9.77808	-43.8777	0.805979	17545.9	0	3.30422	17536.2	-36.79	CTL	VC2682	9.77808	349.4	349.4
Cell_04	15	19947.8	19953.4	-7.71014	-43.0953	1.08233	19961.8	0	6.29944	19951.6	-37.7457	CTL	VC2682	7.71014	2414.9	2414.9
Cell_04	16	8744.42	8746.21	-6.35822	-44.8257	0.633861	8752.74	0	3.40541	8745.91	-22.87	CTL	VC2682	6.35822	8744.42	8744.42
Cell_04	16	13070.3	13071.3	-10.9371	-41.8885	0.665734	13087.1	0	3.0901	13071	-61.1282	CTL	VC2682	10.9371	4325.88	4325.88
Cell_04	16	14336.3	14338	-12.274	-42.6759	0.776622	14351.1	0	3.43194	14337.3	-54.1454	CTL	VC2682	12.274	1266	1266
Cell_04	17	10410.7	10413.2	-10.4437	-40.2214	1.10986	10427.1	0	5.14332	10412.1	-64.3581	CTL	VC2682	10.4437	10410.7	10410.7
Cell_04	17	13430.4	13433.4	-6.4969	-43.8019	2.50436	13452.8	0	3.79976	13431	-63.5313	CTL	VC2682	6.4969	3019.7	3019.7
Cell_04	18	7540.52	7544.11	-15.108	-43.6563	0.702979	7561.63	0	5.93005	7542.37	-107.592	CTL	VC2682	15.108	7540.52	7540.52
Cell_04	18	15884.5	15885.8	-11.0541	-44.2436	0.488388	15894.3	0	4.81283	15885.3	-52.6226	CTL	VC2682	11.0541	8343.98	8343.98
Cell_02	1	4844.55	4845.39	-22.0806	-62.5384	0.388617	4859.41	0	2.62536	4845.14	-81.682	shARL13b_1	VC2682	22.0806	322.5	322.5
Cell_02	1	10813.6	10815.3	-7.56023	-56.8197	1.53992	10823	0	3.98571	10814.1	-33.2725	shARL13b_1	VC2682	7.56023	2745.51	2745.51
Cell_02	1	14495.2	14499	-7.38956	-57.521	0.402321	14505.7	0	3.45099	14498.2	-32.1787	shARL13b_1	VC2682	7.38956	1372.4	1372.4
Cell_02	2	1550.79	1552.81	-21.2119	-48.6001	0.404545	1580.08	0	4.15821	1552.28	-126.028	shARL13b_1	VC2682	21.2119	1550.79	1550.79
Cell_02	2	7227.21	7228.59	-32.4517	-45.6	0.659899	7245.16	0	3.94777	7228.05	-164.293	shARL13b_1	VC2682	32.4517	795.18	795.18
Cell_02	2	14047.5	14048.7	-20.4934	-43.9106	0.543923	14066.6	0	2.76306	14048.2	-122.058	shARL13b_1	VC2682	20.4934	3432.2	3432.2
Cell_02	3	8593.85	8594.85	-16.9846	-38.7338	0.472864	8604.8	0	3.19499	8594.49	-67.8402	shARL13b_1	VC2682	16.9846	7771.39	7771.39
Cell_02	3	19209.4	19214	-7.9489	-35.2153	1.23657	19233.4	0	5.94982	19213.2	-59.9397	shARL13b_1	VC2682	7.9489	3518.1	3518.1
Cell_02	4	7488.04	7491.73	-14.5198	-32.5932	1.00093	7505.28	0	4.1126	7490.69	-73.4834	shARL13b_1	VC2682	14.5198	5306.64	5306.64
Cell_02	4	15555.3	15558.1	-24.339	-33.0036	0.870953	15570.8	0	5.56649	15556.6	-150.134	shARL13b_1	VC2682	24.339	2647.1	2647.1
Cell_02	5	13010	13012.1	-6.05004	-30.3819	1.29464	13018.5	0	2.28554	13010.8	-20.479	shARL13b_1	VC2682	6.05004	4801.71	4801.71
Cell_02	7	3871.71	3874.83	-21.6838	-25.075	0.654601	3887.53	0	4.3804	3873.95	-110.601	shARL13b_1	VC2682	21.6838	3871.71	3871.71
Cell_02	7	17269	17271.7	-18.6142	-24.1707	0.708076	17283.2	0	5.33709	17269.9	-103.78	shARL13b_1	VC2682	18.6142	10350.2	10350.2
Cell_02	8	2956.95	2959.46	-32.6629	-23.9166	0.553035	2970.18	0	4.53865	2958.12	-167.698	shARL13b_1	VC2682	32.6629	1289.53	1289.53
Cell_02	8	6846.91	6850.49	-11.3118	-24.4847	2.1392	6864.66	0	4.42164	6848.38	-70.8676	shARL13b_1	VC2682	11.3118	823.79	823.79
Cell_02	8	14354.9	14356.6	-7.37079	-24.4221	0.466854	14367.4	0	3.61413	14355.4	-39.3836	shARL13b_1	VC2682	7.37079	4643.66	4643.66
Cell_02	9	7555.29	7556.91	-11.9918	-23.683	0.641892	7571.48	0	3.05265	7556.29	-57.9748	shARL13b_1	VC2682	11.9918	7555.29	7555.29
Cell_02	9	16846	16848	-18.913	-22.6089	0.737689	16883.9	0	5.88168	16847	-153.903	shARL13b_1	VC2682	18.913	5448.4	5448.4
Cell_02	9	19192.8	19193.6	-7.18773	-22.3099	0.427212	19203.1	0	5.25673	19193.3	-31.4389	shARL13b_1	VC2682	7.18773	537.7	537.7
Cell_02	10	1484.62	1487.23	-8.50041	-21.3029	1.11649	1491.29	0	3.20558	1486.13	-24.3346	shARL13b_1	VC2682	8.50041	1484.62	1484.62
Cell_02	10	7527.14	7528.72	-19.3093	-22.4204	0.851043	7546.31	0	6.94777	7527.85	-144.563	shARL13b_1	VC2682	19.3093	2639.9	2639.9
Cell_02	10	9483.39	9486.63	-7.83227	-21.6415	0.749995	9494.79	0	4.34858	9486.22	-32.0484	shARL13b_1	VC2682	7.83227	378.21	378.21
Cell_02	10	12799	12800.8	-17.5482	-21.6545	0.650672	12813.1	0	5.05249	12800.4	-91.0318	shARL13b_1	VC2682	17.5482	1942.6	1942.6
Cell_05	2	7362.91	7364.76	-15.9988	-27.3726	0.629586	7377.86	0	3.4013	7364.37	-81.1353	shARL13b_1	VC2682	15.9988	7362.91	7362.91
Cell_05	3	11441.8	11443.1	-11.0491	-26.4022	0.569679	11448.8	0	4.02579	11442.6	-39.2133	shARL13b_1	VC2682	11.0491	7513.29	7513.29
Cell_05	3	19210.8	19213	-11.3586	-24.3897	0.499039	19219.8	0	2.86499	19211.7	-40.3412	shARL13b_1	VC2682	11.3586	2637.6	2637.6
Cell_05	5	12832.5	12834.2	-8.32417	-28.0345	0.852149	12848.6	0	3.18433	12833.2	-55.303	shARL13b_1	VC2682	8.32417	12832.5	12832.5
Cell_05	6	582.304	588.253	-15.6512	-22.3307	0.648117	596.193	0	3.68869	587.822	-55.5037	shARL13b_1	VC2682	15.6512	582.3	582.304
Cell_05	6	6456.42	6460.78	-9.82426	-24.2333	0.813408	6464.51	0	4.25018	6459.38	-38.5037	shARL13b_1	VC2682	9.82426	354.28	354.28
Cell_05	7	2193.63	2196.45	-7.22644	-24.4568	0.761966	2207.36	0	2.85714	2195.6	-38.5249	shARL13b_1	VC2682	7.22644	737.69	737.69
Cell_05	7	5820.24	5822.74	-8.97121	-24.4212	0.962684	5826.9	0	2.79697	5820.92	-29.4043	shARL13b_1	VC2682	8.97121	3626.61	3626.61
Cell_05	7	7326.94	7328.37	-6.24993	-24.2245	0.83729	7334.06	0	2.96582	7327.87	-20.216	shARL13b_1	VC2682	6.24993	1506.7	1506.7
Cell_05	8	1324.46	1325.47	-11.049	-25.5232	0.616456	1344	0	4.4855	1325.13	-85.1994	shARL13b_1	VC2682	11.049	1324.46	1324.46
Cell_05	8	18574.9	18577.6	-9.31226	-22.5052	0.56977	18585.7	0	2.66541	18577.2	-28.888	shARL13b_1	VC2682	9.31226	17250.4	17250.4
Cell_05	9	1787.24	1788.15	-5.54605	-24.2266	0.749583	1791.65	0	1.95155	1787.77	-13.3129	shARL13b_1	VC2682	5.54605	1787.24	1787.24
Cell_05	10	8352.9	8355.11	-10.1532	-21.5727	0.825057	8371.22	0	5.29389	8353.92	-62.1406	shARL13b_1	VC2682	10.1532	1268.2	1268.2
Cell_05	16	10506.8	10513	-17.6311	-19.2458	2.13228	10521.9	0	5.27695	10511.1	-87.3649	shARL13b_1	VC2682	17.6311	1482.39	1482.39
Cell_05	16	13496.1	13497.8	-11.0576	-19.7034	0.491556	13503.1	0	2.88959	13497.4	-33.4978	shARL13b_1	VC2682	11.0576	2989.3	2989.3
Cell_05	16	14529.3	14532	-8.53112	-20.7719	0.631391	14537.8	0	2.9655	14531.1	-28.5537	shARL13b_1	VC2682	8.53112	1033.2	1033.2
Cell_05	17	3466.61	3470.13	-12.9422	-20.1567	0.927124	3478.66	0	4.47755	3468.86	-57.962	shARL13b_1	VC2682	12.9422	3466.61	3466.61
Cell_05	17	3929.53	3933.82	-9.18724	-20.7501	0.931209	3944.19	0	4.61459	3932.83	-46.6349	shARL13b_1	VC2682	9.18724	462.92	462.92
Cell_05	17	4775.58	4778.8	-12.8939	-20.3765	0.782389	4806.48	0	7.36242	4778.09	-126.611	shARL13b_1	VC2682	12.8939	846.05	846.05
Cell_05	17	10982.3	10987.5	-9.58724	-20.4177	0.71612	11003.1	0	4.96297	10986.4	-67.2408	shARL13b_1	VC2682	9.58724	4159.32	4159.32
Cell_05	18	624.864	626.443	-14.7202	-24.7265	0.845295	642.129	0	3.87075	625.614	-88.2255	shARL13b_1	VC2682	14.7202	624.86	624.864
Cell_05	18	1077.27	1078.13	-9.16788	-24.0594	0.347973	1089.93	0	3.28112	1077.71	-40.0706	shARL13b_1	VC2682	9.16788	452.41	452.406
Cell_05	18	15398.8	15402.7	-5.93913	-23.7847	2.98846	15408	0	4.41378	15399.6	-28.2171	shARL13b_1	VC2682	5.93913	2071	2071
Cell_08	1	11859.5	11864	-9.07048	-55.2482	0.967938	11874.9	0	5.43228	11863.4	-52.8899	shARL13b_1	VC2682	9.07048	8765.42	8765.42
Cell_08	1	18860.7	18865.5	-7.28575	-53.3035	1.61488	18868.8	0	2.46522	18863.9	-18.7247	shARL13b_1	VC2682	7.28575	3563.7	3563.7
Cell_08	2	11747	11749.9	-11.0251	-54.0625	1.40426	11758	0	5.50238	11747.8	-59.765	shARL13b_1	VC2682	11.0251	3780.88	3780.88
Cell_08	3	15642.7	15643.9	-13.1366	-49.7172	0.406125	15653	0	1.97887	15643.6	-37.1317	shARL13b_1	VC2682	13.1366	1383	1383
Cell_08	4	9244.76	9247.09	-15.4379	-48.947	1.58705	9261.46	0	5.96436	9245.95	-108.849	shARL13b_1	VC2682	15.4379	4297.48	4297.48
Cell_08	4	19102.7	19106.8	-37.7143	-51.5006	0.503182	19115.7	0	2.2081	19106.5	-108.762	shARL13b_1	VC2682	37.7143	2436.2	2436.2
Cell_08	5	12695.1	12700	-14.9675	-48.1609	2.11936	12714.3	0	3.45033	12699.5	-73.7254	shARL13b_1	VC2682	14.9675	5892.44	5892.44
Cell_08	7	3858.33	3860.23	-11.4782	-45.7904	1.21452	3869.23	0	2.21915	3859.24	-35.8499	shARL13b_1	VC2682	11.4782	3057.12	3057.12
Cell_08	7	17310.5	17312.5	-8.25678	-45.3865	1.26225	17317.7	0	3.32176	17311.4	-26.4826	shARL13b_1	VC2682	8.25678	1217.7	1217.7
Cell_08	8	4212.6	4214.55	-7.81043	-45.1007	1.65071	4228.69	0	4.55167	4213.19	-72.726	shARL13b_1	VC2682	7.81043	392.13	392.13
Cell_08	8	16021.8	16022.6	-9.48911	-43.19	0.372965	16032.6	0	3.233	16022.3	-31.0589	shARL13b_1	VC2682	9.48911	9372.23	9372.23
Cell_08	9	927.774	932.367	-12.0179	-43.7744	1.77932	942.584	0	4.18528	931.083	-51.8928	shARL13b_1	VC2682	12.0179	927.77	927.774
Cell_08	10	4168.53	4172.16	-12.3744	-42.6122	1.56934	4181.11	0	4.58934	4170.75	-57.744	shARL13b_1	VC2682	12.3744	798.59	798.59
Cell_08	10	9551.75	9555.01	-12.5206	-42.8014	1.35161	9564.49	0	4.26876	9552.6	-67.5389	shARL13b_1	VC2682	12.5206	284.11	284.11
Cell_08	12	4908.94	4913.57	-10.7403	-45.0457	1.20084	4925.59	0	7.1233	4911.75	-78.4136	shARL13b_1	VC2682	10.7403	793.5	793.5
Cell_08	12	12090.3	12091.4	-25.5308	-45.3792	0.447327	12098.9	0	1.76206	12090.9	-62.2367	shARL13b_1	VC2682	25.5308	2316.22	2316.22
Cell_08	13	4367.54	4371.11	-11.3991	-44.4475	2.92909	4385.5	0	6.66138	4368.5	-94.1591	shARL13b_1	VC2682	11.3991	4367.54	4367.54
Cell_08	14	1882.05	1883.73	-9.95556	-40.3738	0.904397	1887.84	0	1.79744	1883.37	-22.2334	shARL13b_1	VC2682	9.95556	1071.61	1071.61
Cell_08	14	8301.39	8302.92	-7.83297	-44.2106	0.469871	8323.29	0	5.67184	8302.66	-75.5788	shARL13b_1	VC2682	7.83297	2408.33	2408.33
Cell_08	14	10146.9	10150.1	-8.56254	-42.1757	1.51202	10168.5	0	5.05501	10149	-56.4831	shARL13b_1	VC2682	8.56254	659.46	659.46
Cell_08	14	17851.5	17852.5	-7.96296	-44.9295	0.606348	17857.3	0	2.09895	17852.2	-19.4922	shARL13b_1	VC2682	7.96296	336.3	336.3
Cell_08	15	10105	10108.7	-12.5474	-40.3151	0.588244	10114.7	0	2.98832	10107.9	-38.3042	shARL13b_1	VC2682	12.5474	2206.97	2206.97
Cell_08	15	14623.7	14625.9	-17.9187	-43.6167	0.826457	14636.6	0	4.47373	14624.6	-91.9377	shARL13b_1	VC2682	17.9187	346.6	346.6
Cell_03	2	15595.5	15596.9	-20.682	-97.5065	0.605242	15607	0	3.47169	15596.4	-74.4945	CTL	VC2683	20.682	15595.5	15595.5
Cell_03	3	8713.74	8716.62	-8.80441	-70.3823	0.789294	8733.3	0	4.70412	8715.88	-47.2655	CTL	VC2683	8.80441	4802.24	4802.24
Cell_03	4	8289.03	8291.93	-14.4076	-64.8099	0.969627	8309.51	0	6.03253	8291.02	-93.3985	CTL	VC2683	14.4076	753.44	753.44
Cell_03	5	935.57	940.365	-7.10937	-59.8154	2.24355	948.355	0	4.2202	938.288	-35.7853	CTL	VC2683	7.10937	935.57	935.57
Cell_03	5	15443.6	15448.9	-10.249	-58.147	0.798129	15465.3	0	4.67947	15447.9	-59.664	CTL	VC2683	10.249	500.7	500.7
Cell_03	6	986.319	990.952	-7.38861	-54.7877	2.99853	998.983	0	4.31498	987.812	-35.894	CTL	VC2683	7.38861	986.32	986.319
Cell_03	7	6480.76	6483.18	-10.923	-51.9186	1.0535	6497.59	0	4.37825	6482.39	-61.9887	CTL	VC2683	10.923	4984.06	4984.06
Cell_03	7	15293.6	15299	-10.6908	-51.455	2.34254	15311.5	0	8.08065	15296.5	-77.299	CTL	VC2683	10.6908	1629.5	1629.5
Cell_03	8	3681.69	3683.88	-9.44538	-50.9304	1.23104	3695.19	0	5.00334	3682.25	-61.3567	CTL	VC2683	9.44538	1249.02	1249.02
Cell_03	8	6582.79	6586.35	-7.6721	-49.06	1.66329	6591.32	0	4.84989	6584.66	-14.5043	CTL	VC2683	7.6721	26.38	26.38
Cell_03	8	11231	11233	-7.88343	-49.5629	0.553655	11247.5	0	4.25671	11231.6	-53.8897	CTL	VC2683	7.88343	3018.02	3018.02
Cell_03	8	13969.2	13971.5	-10.829	-48.8388	1.46636	13984.5	0	4.76638	13970.4	-60.3567	CTL	VC2683	10.829	49	49
Cell_03	9	2235.29	2236.64	-6.66732	-46.9637	0.618623	2245.12	0	3.02393	2236.05	-24.7847	CTL	VC2683	6.66732	2235.29	2235.29
Cell_03	9	7104.85	7107.42	-6.36496	-46.0457	2.26164	7116.44	0	5.55242	7105.78	-31.6733	CTL	VC2683	6.36496	1068.04	1068.04
Cell_03	9	12931.5	12934.2	-6.5552	-47.1492	2.27003	12947.1	0	3.04115	12932.2	-39.9389	CTL	VC2683	6.5552	173.4	173.4
Cell_03	9	16514.7	16516.3	-7.90038	-46.7745	1.15756	16526.8	0	3.36419	16515.3	-38.8369	CTL	VC2683	7.90038	1660.4	1660.4
Cell_03	10	1967.67	1969.71	-6.54016	-45.4007	0.624652	1988.69	0	6.07606	1968.34	-66.9695	CTL	VC2683	6.54016	1317.62	1317.62
Cell_03	10	6916.92	6919.07	-9.86216	-45.747	0.590394	6936.25	0	5.23101	6918.45	-70.9263	CTL	VC2683	9.86216	220.69	220.69
Cell_03	10	13177	13179.7	-8.32298	-43.3432	2.27415	13188.4	0	3.73097	13177.8	-37.6106	CTL	VC2683	8.32298	651.9	651.9
Cell_03	11	3723.87	3727.07	-10.1968	-40.5352	0.955788	3735.63	0	5.12132	3725.82	-50.0714	CTL	VC2683	10.1968	1731.59	1731.59
Cell_03	11	8050.23	8051.39	-5.98273	-40.8186	0.686202	8060.58	0	2.47705	8050.95	-21.4804	CTL	VC2683	5.98273	102.96	102.96
Cell_03	12	5697.67	5700.37	-5.75972	-40.5903	1.1471	5712.16	0	3.9842	5698.69	-37.4289	CTL	VC2683	5.75972	908.5	908.5
Cell_03	12	12874.8	12880.4	-7.12799	-39.3442	2.10961	12895.4	0	5.80372	12878.3	-56.376	CTL	VC2683	7.12799	466	466
Cell_13	2	2181.67	2183.05	-12.6823	-30.5671	0.490421	2194.25	0	3.72276	2182.62	-54.2641	shARL13b_1	VC2683	12.6823	2181.67	2181.67
Cell_13	2	6412.78	6415.6	-7.59411	-31.639	2.2693	6424.19	0	5.24481	6413.97	-37.0701	shARL13b_1	VC2683	7.59411	2565.14	2565.14
Cell_13	3	985.482	988.153	-15.7429	-35.6241	1.67677	1002.16	0	6.06293	987.063	-122.773	shARL13b_1	VC2683	15.7429	985.48	985.482
Cell_13	3	4408.71	4412.1	-8.15872	-35.3773	1.90279	4416	0	3.85973	4410.93	-23.4511	shARL13b_1	VC2683	8.15872	726.46	726.46
Cell_13	4	5278.19	5281.28	-7.56549	-34.506	2.75419	5287.1	0	4.04816	5278.68	-30.3612	shARL13b_1	VC2683	7.56549	5278.19	5278.19
Cell_13	4	12528.9	12534.5	-7.699	-33.0906	1.18767	12540.3	0	2.70049	12533.8	-25.3529	shARL13b_1	VC2683	7.699	7250.71	7250.71
Cell_13	5	3728.37	3729.87	-6.12335	-33.5003	0.617356	3735.82	0	3.64811	3728.95	-19.2743	shARL13b_1	VC2683	6.12335	3728.37	3728.37
Cell_13	5	14263.7	14265.2	-6.66568	-34.2523	0.577948	14275.2	0	2.86299	14264.2	-34.0713	shARL13b_1	VC2683	6.66568	10535.3	10535.3
Cell_13	6	19746.6	19748.1	-7.99457	-32.8927	0.869548	19755.5	0	4.5444	19747	-31.7712	shARL13b_1	VC2683	7.99457	9652.4	9652.4
Cell_13	7	4533.9	4537.07	-7.80504	-36.9883	2.61553	4549.46	0	5.55767	4534.69	-64.52	shARL13b_1	VC2683	7.80504	661.91	661.91
Cell_13	7	11834.2	11837	-7.25147	-33.7029	2.02327	11840.7	0	4.3853	11834.9	-25.3446	shARL13b_1	VC2683	7.25147	7220.4	7220.4
Cell_13	7	18194.9	18197.4	-13.2523	-33.0852	0.938914	18209.2	0	3.8966	18196	-78.6056	shARL13b_1	VC2683	13.2523	2250.3	2250.3
Cell_13	8	4762.23	4763.61	-6.79357	-33.2332	0.467757	4769.57	0	3.01585	4762.76	-21.1074	shARL13b_1	VC2683	6.79357	4762.23	4762.23
Cell_13	8	7553.05	7557.11	-11.9658	-32.2296	1.06827	7567.09	0	5.64825	7556.43	-54.8967	shARL13b_1	VC2683	11.9658	197.72	197.72
Cell_13	8	7616.51	7617.9	-10.6758	-34.2092	0.759039	7650.85	0	2.45396	7617.57	-86.646	shARL13b_1	VC2683	10.6758	63.46	63.46
Cell_13	8	17507.6	17511.2	-7.58248	-31.0829	2.18862	17514.5	0	2.45051	17509.7	-17.0858	shARL13b_1	VC2683	7.58248	3033.4	3033.4
Cell_13	9	1897.78	1904.32	-8.52742	-32.952	1.39338	1910.43	0	3.93915	1902.95	-32.0256	shARL13b_1	VC2683	8.52742	1897.78	1897.78
Cell_13	9	5357.81	5360.86	-10.0276	-34.6743	1.69693	5378.24	0	3.62407	5359.69	-69.8083	shARL13b_1	VC2683	10.0276	1859.41	1859.41
Cell_13	9	7145.46	7146.41	-11.573	-34.2643	0.623597	7159.95	0	4.61134	7146.08	-66.2192	shARL13b_1	VC2683	11.573	1787.65	1787.65
Cell_13	9	12320.2	12325.1	-10.3448	-32.6783	0.824248	12331.3	0	2.44984	12324.6	-25.2297	shARL13b_1	VC2683	10.3448	4882.47	4882.47
Cell_13	9	15835.3	15836.2	-7.19981	-33.8949	0.505952	15843.3	0	4.50447	15835.8	-28.3468	shARL13b_1	VC2683	7.19981	3515.1	3515.1
Cell_13	10	2555.45	2556.16	-12.7392	-34.7636	0.307357	2571.51	0	3.17531	2555.92	-64.4749	shARL13b_1	VC2683	12.7392	1583.06	1583.06
Cell_13	10	13841	13844.1	-12.1068	-33.8213	2.51305	13859.6	0	3.9474	13842	-82.3563	shARL13b_1	VC2683	12.1068	9997.81	9997.81
Cell_15	1	3207.9	3210	-9.06373	-29.681	0.480313	3218.76	0	1.89272	3209.55	-31.391	shARL13b_1	VC2683	9.06373	709.24	709.24
Cell_15	2	9921.53	9924.72	-14.0648	-17.2033	1.63504	9935.58	0	7.17438	9922.89	-89.5126	shARL13b_1	VC2683	14.0648	145.03	145.03
Cell_15	3	6529.17	6530.17	-17.2661	-13.0865	0.426042	6540.3	0	2.98965	6529.91	-67.6425	shARL13b_1	VC2683	17.2661	1114.46	1114.46
Cell_15	3	17947.4	17949.7	-7.0678	-10.9557	1.56319	17955.5	0	2.41055	17949.1	-24.5015	shARL13b_1	VC2683	7.0678	3502.1	3502.1
Cell_15	4	5398.26	5401.25	-7.93646	-9.90398	0.974024	5407.44	0	3.54782	5400.21	-22.0744	shARL13b_1	VC2683	7.93646	149.33	149.33
Cell_15	4	15292.2	15294.6	-13.2257	-10.6937	0.807019	15306.9	0	4.23093	15293	-80.6852	shARL13b_1	VC2683	13.2257	297.1	297.1
Cell_15	4	18263.6	18264.6	-8.6395	-9.42048	0.560303	18272.2	0	3.45807	18264.4	-28.5224	shARL13b_1	VC2683	8.6395	731.4	731.4
Cell_15	5	5850.74	5852.34	-13.7224	-6.55874	0.867779	5862.92	0	3.9772	5851.51	-56.8047	shARL13b_1	VC2683	13.7224	815.78	815.78
Cell_15	5	10884.3	10885.7	-7.28027	-5.24391	0.963024	10894.6	0	2.92669	10885	-24.6373	shARL13b_1	VC2683	7.28027	557.2	557.2
Cell_15	5	17440.7	17441.6	-12.2392	-5.75965	0.411574	17450.5	0	2.7963	17441.3	-36.9459	shARL13b_1	VC2683	12.2392	1956.8	1956.8
Cell_15	6	10276.8	10279.8	-7.48897	-6.79292	0.406961	10286.5	0	3.60961	10278.8	-28.929	shARL13b_1	VC2683	7.48897	797.54	797.54
Cell_15	6	16207.9	16211.5	-10.0799	-5.2762	2.65085	16220.9	0	5.25591	16209.2	-48.3122	shARL13b_1	VC2683	10.0799	1614.4	1614.4
Cell_15	7	10210.5	10212	-6.1041	-8.95294	1.06571	10218.1	0	4.50738	10211.1	-27.3903	shARL13b_1	VC2683	6.1041	2306.71	2306.71
Cell_15	7	15903.1	15907.6	-7.07233	-8.14963	0.632382	15918.1	0	3.35722	15906.4	-35.3847	shARL13b_1	VC2683	7.07233	481.9	481.9
Cell_15	8	5295.13	5296.08	-27.7027	-8.65539	0.442122	5306.17	0	2.91904	5295.7	-87.2811	shARL13b_1	VC2683	27.7027	563.22	563.22
Cell_15	8	15992.6	15996.8	-12.0842	-7.8619	2.86106	16006.7	0	5.27543	15995	-69.1715	shARL13b_1	VC2683	12.0842	85.4	85.4
Cell_15	9	719.049	725.019	-17.9464	-7.12659	1.36214	742.777	0	6.54399	721.917	-121.124	shARL13b_1	VC2683	17.9464	719.05	719.049
Cell_15	9	8285.77	8288.53	-7.25494	-7.72882	0.577142	8294.92	0	2.79947	8287.82	-29.7384	shARL13b_1	VC2683	7.25494	123.98	123.98
Cell_15	9	16565.9	16569.7	-8.4378	-8.01707	1.61368	16580.3	0	3.57047	16568.6	-36.9279	shARL13b_1	VC2683	8.4378	6138.8	6138.8
Cell_15	9	19750.1	19752.9	-9.22766	-6.82417	1.41025	19765.6	0	4.38296	19750.7	-44.1782	shARL13b_1	VC2683	9.22766	936.4	936.4
Cell_15	10	3380.53	3382.35	-7.26671	-10.3476	0.477174	3390.59	0	3.06871	3381.02	-41.6806	shARL13b_1	VC2683	7.26671	1277.87	1277.87
Cell_15	10	7487.3	7491.33	-15.5611	-7.83942	2.38431	7508.68	0	4.49628	7489.58	-96.112	shARL13b_1	VC2683	15.5611	445.26	445.26
Cell_15	10	15724.8	15728.5	-9.04548	-7.10404	1.61632	15735.6	0	3.26024	15727.9	-30.4213	shARL13b_1	VC2683	9.04548	1668.3	1668.3
Cell_17	1	9535.82	9539.21	-14.213	-59.3401	0.649608	9555.08	0	2.02963	9538.67	-62.7651	shARL13b_1	VC2683	14.213	5542.75	5542.75
Cell_17	1	16571.3	16574.9	-18.476	-59.0749	1.01197	16585.7	0	3.77045	16574.1	-76.7101	shARL13b_1	VC2683	18.476	5859.1	5859.1
Cell_17	2	13826.9	13828.3	-9.57834	-58.5238	1.14308	13836.3	0	3.42988	13827.4	-31.3243	shARL13b_1	VC2683	9.57834	488.1	488.1
Cell_17	3	5319.19	5319.87	-11.8302	-57.0414	0.364069	5330.67	0	1.71394	5319.81	-40.9178	shARL13b_1	VC2683	11.8302	1439.33	1439.33
Cell_17	4	1572.16	1573.21	-9.65722	-57.3286	0.402619	1593.2	0	3.31195	1572.84	-71.2409	shARL13b_1	VC2683	9.65722	1572.16	1572.16
Cell_17	4	4972.53	4974.16	-7.79091	-56.3201	0.567631	4981.84	0	2.77099	4973.89	-32.893	shARL13b_1	VC2683	7.79091	527.13	527.13
Cell_17	4	15482.6	15484.1	-10.114	-57.226	0.701498	15501.7	0	3.31766	15483.3	-69.2121	shARL13b_1	VC2683	10.114	708.4	708.4
Cell_17	4	19013.1	19015.6	-11.4358	-56.063	1.23961	19025	0	3.39777	19014.8	-48.7903	shARL13b_1	VC2683	11.4358	618	618
Cell_17	5	836.994	839.39	-9.17963	-55.432	1.29441	849.932	0	3.22527	838.435	-35.9059	shARL13b_1	VC2683	9.17963	836.99	836.994
Cell_17	5	4344.82	4347.11	-14.7857	-54.8004	1.08864	4367.87	0	5.20469	4346.56	-113.216	shARL13b_1	VC2683	14.7857	610.13	610.13
Cell_17	5	13385.8	13388.7	-11.1001	-57.0633	2.15484	13396.2	0	3.47968	13386.4	-48.0821	shARL13b_1	VC2683	11.1001	5338.14	5338.14
Cell_17	6	5644.07	5647.39	-9.20804	-55.0007	1.41467	5675.2	0	4.92188	5645.51	-124.038	shARL13b_1	VC2683	9.20804	3810.92	3810.92
Cell_17	6	16053	16055.8	-17.6794	-55.9287	0.478223	16070.6	0	4.30303	16054.2	-115.031	shARL13b_1	VC2683	17.6794	446.6	446.6
Cell_17	7	2461.3	2462.38	-8.87968	-55.3897	0.600614	2467.08	0	1.47481	2461.83	-19.7194	shARL13b_1	VC2683	8.87968	2461.3	2461.3
Cell_17	7	8364.2	8365.91	-6.55845	-58.6818	0.855991	8377.54	0	4.72623	8365.03	-36.1965	shARL13b_1	VC2683	6.55845	755.1	755.1
Cell_17	8	2903.74	2904.67	-6.82296	-55.4023	0.306162	2909.24	0	2.43334	2904.32	-16.9179	shARL13b_1	VC2683	6.82296	2308.45	2308.45
Cell_17	8	11618.1	11619.5	-13.2907	-55.465	0.632448	11635.1	0	3.80934	11618.8	-81.9225	shARL13b_1	VC2683	13.2907	957.9	957.9
Cell_17	8	16900.9	16901.8	-6.15045	-56.3678	0.421991	16907.3	0	3.61706	16901.4	-21.6488	shARL13b_1	VC2683	6.15045	3216.1	3216.1
Cell_17	9	2022.89	2027.89	-12.5161	-56.2399	1.69696	2044.93	0	6.72755	2026	-93.6816	shARL13b_1	VC2683	12.5161	589.82	589.82
Cell_17	9	8803.05	8804.4	-9.5308	-56.6495	0.743323	8814.92	0	1.91285	8803.65	-35.9888	shARL13b_1	VC2683	9.5308	440.37	440.37
Cell_17	9	10640.9	10644.9	-13.2858	-55.5739	0.687914	10656	0	5.01058	10644.3	-59.477	shARL13b_1	VC2683	13.2858	450.5	450.5
Cell_17	9	16360.5	16363.7	-10.0865	-54.5738	2.81872	16371.6	0	5.76752	16361.4	-49.9245	shARL13b_1	VC2683	10.0865	853.2	853.2
Cell_17	3	15651	15653.7	-9.53128	-55.715	0.579771	15660.1	0	3.56544	15652.6	-28.8743	shARL13b_1	VC2683	9.53128	2687.7	2687.7
Cell_08	1	4075.93	4078.78	-12.7688	-38.1096	2.01698	4090.74	0	6.00154	4076.88	-77.3065	CTL	VC2810	12.7688	145.1	145.1
Cell_08	1	6131.76	6134.87	-7.64392	-39.9207	2.00082	6147.66	0	8.25117	6132.58	-65.2706	CTL	VC2810	7.64392	531.05	531.05
Cell_08	1	10574.3	10576.4	-15.2544	-37.0586	0.965732	10594.5	0	3.96824	10575.6	-99.6038	CTL	VC2810	15.2544	1912.84	1912.84
Cell_08	1	15460.4	15461.5	-7.01764	-34.6202	0.755959	15470.5	0	3.66019	15461	-37.7684	CTL	VC2810	7.01764	1386.1	1386.1
Cell_08	2	9147.81	9149.31	-9.86744	-29.8783	0.68373	9157.64	0	3.98855	9148.85	-38.9502	CTL	VC2810	9.86744	2116.54	2116.54
Cell_08	2	15124.2	15125.2	-6.61549	-29.749	0.457937	15130.6	0	1.97026	15124.9	-19.8902	CTL	VC2810	6.61549	1704.9	1704.9
Cell_08	3	1859.29	1862.13	-23.2766	-27.5351	0.635681	1888.21	0	5.44564	1861.59	-189.954	CTL	VC2810	23.2766	701.96	701.96
Cell_08	3	12223.3	12226.1	-9.10198	-26.4993	2.17478	12240.7	0	7.54941	12224.4	-68.1189	CTL	VC2810	9.10198	96.7	96.7
Cell_08	3	18128.8	18130.3	-7.95208	-25.2081	1.04768	18138.1	0	4.79003	18129.6	-29.3891	CTL	VC2810	7.95208	958.8	958.8
Cell_08	4	6936.27	6942.46	-12.3007	-24.6436	2.65625	6958.19	0	6.07888	6940.72	-96.391	CTL	VC2810	12.3007	457.51	457.51
Cell_08	4	11958.4	11959.4	-5.46098	-24.4829	0.45349	11966	0	2.70864	11959	-19.4785	CTL	VC2810	5.46098	157.2	157.2
Cell_08	5	6445.18	6447.59	-6.83356	-21.6756	1.22282	6455.9	0	3.54675	6446.25	-31.7774	CTL	VC2810	6.83356	927.91	927.91
Cell_08	5	12306.3	12307.1	-7.84546	-23.6912	0.357839	12321	0	2.90451	12306.9	-36.7828	CTL	VC2810	7.84546	157.8	157.8
Cell_08	6	761.271	763.409	-10.1027	-23.5639	1.59752	773.126	0	1.75327	762.784	-44.0714	CTL	VC2810	10.1027	761.27	761.271
Cell_08	6	6436.61	6438.99	-10.0908	-20.585	1.66195	6448.09	0	4.32886	6437.62	-46.3283	CTL	VC2810	10.0908	1250.21	1250.21
Cell_08	6	11839.5	11841.6	-13.4582	-20.6601	0.724226	11851	0	4.13618	11841	-57.5191	CTL	VC2810	13.4582	916.9	916.9
Cell_08	6	19520.3	19523.3	-7.72171	-19.3472	1.22806	19530.4	0	2.99099	19521.7	-24.7798	CTL	VC2810	7.72171	952.8	952.8
Cell_08	7	13147	13148.7	-14.3011	-19.6096	0.961633	13166.6	0	4.21276	13147.9	-94.6915	CTL	VC2810	14.3011	1918.1	1918.1
Cell_08	7	17706.9	17709.2	-7.35526	-17.8766	0.825278	17714.9	0	2.36412	17708.3	-19.4748	CTL	VC2810	7.35526	1522.7	1522.7
Cell_08	8	4357.54	4359.91	-7.34888	-17.8341	1.05592	4368.14	0	5.81978	4358.47	-37.887	CTL	VC2810	7.34888	102.34	102.34
Cell_08	9	5747.01	5749.96	-10.6695	-17.5405	1.7605	5759.82	0	5.27048	5748.44	-52.9386	CTL	VC2810	10.6695	845.42	845.42
Cell_08	9	14763.3	14766.7	-8.45711	-17.3727	1.09053	14772.3	0	3.81106	14764.6	-35.2984	CTL	VC2810	8.45711	3414.9	3414.9
Cell_08	10	10158.8	10160.1	-9.65134	-17.5821	0.788624	10169.7	0	4.48959	10159.3	-50.0172	CTL	VC2810	9.65134	2242.27	2242.27
Cell_04	1	1749.55	1752.76	-7.7353	-9.37241	1.25258	1757.92	0	2.40357	1751.4	-28.8506	shARL13b_2	VC2810	7.7353	1058.51	1058.51
Cell_04	1	6212.74	6214.25	-9.03479	-8.33566	0.405913	6224.48	0	6.15148	6213.29	-49.296	shARL13b_2	VC2810	9.03479	1410.6	1410.6
Cell_04	2	1942.76	1946.11	-8.56883	-7.89852	0.635147	1965.98	0	6.18581	1945.08	-68.9025	shARL13b_2	VC2810	8.56883	1942.76	1942.76
Cell_04	2	10109.2	10113.7	-13.7339	-7.09064	0.745809	10120.4	0	3.42913	10112.5	-49.9687	shARL13b_2	VC2810	13.7339	5336.76	5336.76
Cell_04	2	12941.3	12948	-11.7291	-7.71019	2.02425	12971.7	0	5.28584	12946.1	-114.775	shARL13b_2	VC2810	11.7291	2591.9	2591.9
Cell_04	3	3664.49	3666.68	-19.2963	-5.78272	1.25524	3692.78	0	5.42372	3665.48	-147.287	shARL13b_2	VC2810	19.2963	3664.49	3664.49
Cell_04	3	13624.2	13627.2	-8.1034	-5.70278	0.977359	13636.6	0	4.09483	13625.2	-45.0248	shARL13b_2	VC2810	8.1034	5399.25	5399.25
Cell_04	4	11072	11073.8	-9.58456	-4.28249	0.869006	11085.1	0	3.80049	11073.2	-43.4995	shARL13b_2	VC2810	9.58456	1920.39	1920.39
Cell_04	4	13897.2	13899.7	-24.3536	-4.4608	0.465076	13917.4	0	3.45487	13898.4	-128.483	shARL13b_2	VC2810	24.3536	266.7	266.7
Cell_04	5	9932.69	9937.12	-7.20136	-2.3078	2.68137	9943.47	0	4.66566	9934.32	-40.3549	shARL13b_2	VC2810	7.20136	1115.16	1115.16
Cell_04	5	15475.2	15476.5	-24.7022	-3.19089	0.485032	15490	0	3.45109	15475.8	-108.081	shARL13b_2	VC2810	24.7022	1482.1	1482.1
Cell_04	6	9438.28	9439.24	-11.3991	-2.45562	0.385946	9454.71	0	3.63145	9438.85	-70.0991	shARL13b_2	VC2810	11.3991	872.87	872.87
Cell_04	6	18120.2	18122.5	-22.8866	-3.16297	1.00248	18137	0	5.53446	18121.4	-148.224	shARL13b_2	VC2810	22.8866	4642.4	4642.4
Cell_04	7	14088.8	14090.7	-9.1143	-0.473986	0.644727	14097.8	0	3.56336	14090.1	-34.4998	shARL13b_2	VC2810	9.1143	4454.63	4454.63
Cell_04	7	18069.5	18072.5	-12.5959	-0.489606	0.60291	18082.6	0	3.35037	18071	-58.0595	shARL13b_2	VC2810	12.5959	801	801
Cell_04	8	2718.41	2719.92	-5.55616	-1.96883	0.990252	2732.69	0	2.73971	2719.18	-41.4007	shARL13b_2	VC2810	5.55616	646.38	646.38
Cell_04	8	7972.6	7978.6	-41.0038	-1.06759	2.84724	8004.45	0	10.5035	7974.97	-493.176	shARL13b_2	VC2810	41.0038	2140.62	2140.62
Cell_04	8	17122.7	17124.1	-13.5436	-1.17769	0.953278	17139.3	0	3.44814	17123.5	-83.0847	shARL13b_2	VC2810	13.5436	3224.8	3224.8
Cell_04	9	2181.19	2183.45	-11.6214	0.89797	1.261	2193.94	0	6.41944	2182.04	-73.8029	shARL13b_2	VC2810	11.6214	2181.19	2181.19
Cell_04	9	13122.2	13123.3	-16.6751	1.86219	0.511258	13145.3	0	3.92779	13122.7	-105.92	shARL13b_2	VC2810	16.6751	1101.5	1101.5
Cell_04	10	3548.64	3550.51	-7.75623	1.2502	1.36796	3558.98	0	2.94884	3549.55	-33.7997	shARL13b_2	VC2810	7.75623	3548.64	3548.64
Cell_04	10	7348.98	7351.76	-31.4863	1.90889	0.903503	7365.46	0	4.43464	7351.09	-164.67	shARL13b_2	VC2810	31.4863	122.71	122.71
Cell_04	10	19367.8	19370.2	-21.2806	2.32925	0.377477	19382.5	0	3.9481	19369.2	-98.2079	shARL13b_2	VC2810	21.2806	901.1	901.1
Cell_04	1	18352.4	18357.2	-7.94844	-8.73831	0.985665	18364.5	0	4.10524	18355.4	-43.6295	CTL	VC2836	7.94844	875.6	875.6
Cell_04	2	2869	2872.48	-5.70127	-8.40991	1.68572	2878.97	0	3.2588	2871.1	-23.0544	CTL	VC2836	5.70127	2341.08	2341.07
Cell_04	2	19583.5	19584.9	-7.74027	-7.85356	1.00818	19590.5	0	2.56908	19584.2	-22.2714	CTL	VC2836	7.74027	4669.3	4669.3
Cell_04	3	13555.8	13558.8	-12.0493	-7.33518	1.99994	13572.9	0	5.44797	13556.5	-78.2777	CTL	VC2836	12.0493	3712.39	3712.39
Cell_04	3	19176.9	19180.4	-8.38987	-7.28973	0.640248	19187.7	0	1.74184	19180	-24.7791	CTL	VC2836	8.38987	701.8	701.8
Cell_04	4	3693.63	3694.48	-22.2919	-7.90193	0.422671	3703.47	0	2.66695	3694.18	-74.4698	CTL	VC2836	22.2919	446.94	446.94
Cell_04	4	16679.4	16680.4	-8.12814	-6.80726	0.435449	16686.8	0	2.25954	16680.2	-20.1415	CTL	VC2836	8.12814	2103.8	2103.8
Cell_04	5	6807.79	6810.1	-8.87436	-6.67721	1.60917	6817.48	0	2.11271	6808.95	-26.6959	CTL	VC2836	8.87436	3409.72	3409.72
Cell_04	5	17623.6	17625.2	-9.28613	-7.36416	0.799239	17635.5	0	2.91243	17624.5	-38.6954	CTL	VC2836	9.28613	3089.9	3089.9
Cell_04	6	2099.92	2100.67	-5.905	-8.99969	0.244382	2108.39	0	1.61022	2100.3	-24.8959	CTL	VC2836	5.905	637.9	637.9
Cell_04	6	13841.9	13842.5	-7.03871	-7.50592	0.311455	13846.7	0	2.11638	13842.5	-17.7819	CTL	VC2836	7.03871	7156.71	7156.71
Cell_04	7	1539.11	1540.61	-7.94839	-7.21219	0.77926	1549.32	0	3.44484	1539.7	-30.7477	CTL	VC2836	7.94839	1539.11	1539.11
Cell_04	7	6562.22	6564.56	-13.6986	-7.12635	0.519512	6573.91	0	2.45778	6564.03	-50.3458	CTL	VC2836	13.6986	1241.38	1241.38
Cell_04	8	2313.13	2314.22	-8.09191	-7.97831	0.435934	2319.25	0	2.34356	2313.6	-23.7453	CTL	VC2836	8.09191	391.15	391.15
Cell_04	8	16134.9	16135.6	-13.5903	-7.39337	0.371997	16141.3	0	2.17548	16135.5	-38.2314	CTL	VC2836	13.5903	1429.9	1429.9
Cell_04	9	7552.25	7554.11	-8.28174	-7.73385	1.22255	7565.6	0	2.65321	7553.21	-39.5642	CTL	VC2836	8.28174	1479.25	1479.25
Cell_04	10	748.509	751.412	-6.04968	-7.46333	1.67884	755.708	0	2.99573	750.902	-19.8861	CTL	VC2836	6.04968	748.51	748.509
Cell_04	7	15698.4	15702.9	-6.60448	-7.18329	1.88419	15714	0	3.93691	15700.5	-36.9604	CTL	VC2836	6.60448	284.8	284.8
Cell_04	8	7271.6	7275.78	-10.2573	-6.79567	0.855527	7283.56	0	4.72649	7275.08	-43.8227	CTL	VC2836	10.2573	496.6	496.6
Cell_04	9	13834.6	13838.3	-8.61696	-6.59868	0.819741	13848.5	0	2.79326	13837.6	-35.7773	CTL	VC2836	8.61696	5915.59	5915.59
Cell_04	10	6865.59	6868.68	-13.1303	-7.59699	0.674032	6876.82	0	2.95404	6867.98	-49.4615	CTL	VC2836	13.1303	791.37	791.37
Cell_04	10	7498.82	7500.52	-13.161	-7.99375	0.449512	7516.2	0	4.54794	7499.43	-85.5149	CTL	VC2836	13.161	633.23	633.23
Cell_04	10	16173.2	16174.2	-9.98944	-6.8373	0.456185	16180.3	0	1.60191	16173.8	-21.0467	CTL	VC2836	9.98944	740.7	740.7
Cell_07	1	4675.61	4678.03	-8.58649	-47.4682	1.54434	4687.76	0	5.75594	4677.09	-45.8876	CTL	VC2836	8.58649	2673.38	2673.38
Cell_07	1	18440.7	18442.4	-7.77794	-44.3393	1.24694	18451.8	0	4.07557	18441.8	-31.8269	CTL	VC2836	7.77794	188.7	188.7
Cell_07	1	19325.4	19327.2	-6.91764	-44.8464	0.279506	19332.8	0	5.57266	19325.8	-36.2915	CTL	VC2836	6.91764	884.7	884.7
Cell_07	2	1553.06	1554.21	-7.25039	-44.3238	0.831461	1559.33	0	2.93105	1553.62	-22.8608	CTL	VC2836	7.25039	1553.06	1553.06
Cell_07	2	18629.6	18633.1	-7.79427	-44.9521	2.4604	18641.5	0	5.76307	18630.3	-42.5319	CTL	VC2836	7.79427	558.9	558.9
Cell_07	3	1446.01	1447.24	-9.29254	-44.8029	0.876194	1455.41	0	3.46286	1446.79	-27.8693	CTL	VC2836	9.29254	1446.01	1446.01
Cell_07	3	19115.7	19120.2	-10.9255	-39.6481	1.13951	19128.3	0	5.72556	19119.1	-42.329	CTL	VC2836	10.9255	8151.7	8151.7
Cell_07	4	3291.54	3294.78	-7.1722	-38.3538	1.37989	3299.83	0	1.93727	3294.25	-19.4454	CTL	VC2836	7.1722	701.07	701.07
Cell_07	4	14216.3	14222	-8.55788	-37.6884	2.80902	14228.4	0	4.70013	14220.1	-33.6434	CTL	VC2836	8.55788	957.2	957.2
Cell_07	5	10962.1	10965.9	-6.73307	-36.3573	1.51044	10973.2	0	2.67167	10964.4	-25.7004	CTL	VC2836	6.73307	10962.1	10962.1
Cell_07	6	4188.36	4191.35	-9.86692	-33.9439	0.905052	4203.71	0	5.7705	4189.33	-63.1751	CTL	VC2836	9.86692	4188.36	4188.36
Cell_07	6	15061.5	15066.4	-15.2649	-34.7228	1.49169	15077.1	0	4.38391	15065.1	-91.2135	CTL	VC2836	15.2649	740.9	740.9
Cell_07	6	19869.2	19873.2	-24.8212	-34.5414	1.69161	19885.2	0	3.87955	19872.4	-134.799	CTL	VC2836	24.8212	1459	1459
Cell_07	7	6263.54	6267.83	-10.5564	-33.5778	0.424293	6286.09	0	2.61558	6267.5	-61.5451	CTL	VC2836	10.5564	4756.65	4756.65
Cell_07	7	18586.8	18588.8	-10.2235	-33.8867	0.502737	18594.2	0	2.75369	18587.3	-35.2236	CTL	VC2836	10.2235	6666.3	6666.3
Cell_07	8	1210.45	1211.1	-8.30429	-31.9966	0.381594	1215.3	0	2.82569	1211.06	-21.8497	CTL	VC2836	8.30429	1210.45	1210.45
Cell_07	8	3134.27	3138.02	-14.1156	-31.355	1.32435	3158.31	0	4.97106	3135.93	-92.1354	CTL	VC2836	14.1156	1699.37	1699.37
Cell_07	8	12477	12479.5	-9.55389	-32.4565	1.91368	12490.1	0	2.96413	12477.9	-50.4769	CTL	VC2836	9.55389	3343.27	3343.27
Cell_07	8	14624.4	14625.5	-15.2733	-32.4924	0.614972	14634.2	0	3.21723	14625	-67.4823	CTL	VC2836	15.2733	2147.4	2147.4
Cell_07	9	5045.94	5049.94	-11.2349	-32.1244	2.02063	5068.01	0	5.49145	5048.56	-83.4528	CTL	VC2836	11.2349	5045.94	5045.94
Cell_07	9	5770.04	5772.16	-10.1979	-32.0077	1.67073	5783.68	0	4.16707	5770.61	-58.5945	CTL	VC2836	10.1979	724.1	724.1
Cell_07	9	8350.16	8351.51	-19.5066	-30.8108	0.427259	8367.87	0	3.96419	8350.71	-120.553	CTL	VC2836	19.5066	2580.12	2580.12
Cell_07	10	19417.5	19422.7	-13.0415	-27.9189	0.752488	19430.9	0	3.58593	19422.2	-60.3272	CTL	VC2836	13.0415	6567.4	6567.4
Cell_06	1	15804.7	15806	-8.03207	-41.8701	0.740359	15814.9	0	2.35017	15805.5	-29.0772	shARL13b_2	VC2836	8.03207	15804.7	15804.7
Cell_06	2	841.36	845.788	-10.2877	-39.2663	1.6175	855.976	0	5.62862	843.54	-66.5245	shARL13b_2	VC2836	10.2877	841.36	841.36
Cell_06	2	1855.43	1856.74	-15.6671	-39.1301	0.466399	1872.19	0	5.92912	1856.04	-94.1343	shARL13b_2	VC2836	15.6671	1014.07	1014.07
Cell_06	2	10396.4	10398.2	-12.1638	-38.0495	0.804812	10413.3	0	4.7606	10397.4	-81.0029	shARL13b_2	VC2836	12.1638	8540.97	8540.97
Cell_06	3	17167.6	17169.7	-7.0647	-33.963	1.69741	17185.1	0	4.5753	17168.2	-44.4901	shARL13b_2	VC2836	7.0647	17167.6	17167.6
Cell_06	4	1864.07	1871.13	-17.4224	-33.2062	1.23563	1892.14	0	6.2264	1869.36	-125.934	shARL13b_2	VC2836	17.4224	1864.07	1864.07
Cell_06	4	7068.09	7071.23	-10.1848	-31.7035	1.03867	7083.77	0	2.38124	7070.69	-45.9475	shARL13b_2	VC2836	10.1848	5204.02	5204.02
Cell_06	4	14643.6	14645.5	-20.1483	-32.6715	0.579949	14660.3	0	4.66905	14644.4	-127.401	shARL13b_2	VC2836	20.1483	7575.51	7575.51
Cell_06	5	15769	15772.7	-8.72441	-30.1669	2.14536	15795	0	6.73837	15771.2	-76.1164	shARL13b_2	VC2836	8.72441	15769	15769
Cell_06	5	17915.6	17916.9	-9.64807	-29.7378	0.662326	17929.9	0	3.86375	17916.2	-45.9087	shARL13b_2	VC2836	9.64807	2146.6	2146.6
Cell_06	6	9772.65	9774.76	-6.18415	-28.7095	1.513	9782.51	0	3.4721	9773.5	-23.7405	shARL13b_2	VC2836	6.18415	9772.65	9772.65
Cell_06	6	17174.5	17176.9	-6.65907	-28.7962	1.46766	17184.4	0	5.1142	17175.2	-39.5668	shARL13b_2	VC2836	6.65907	7401.85	7401.85
Cell_06	7	4447.93	4453.09	-12.9956	-28.3739	1.23346	4471.12	0	5.88777	4451.9	-96.9846	shARL13b_2	VC2836	12.9956	4447.93	4447.93
Cell_06	7	17992.5	17995.7	-7.67135	-26.1909	1.3369	18010.4	0	5.43342	17994.6	-43.4247	shARL13b_2	VC2836	7.67135	13544.6	13544.6
Cell_06	9	698.739	701.225	-7.2372	-26.3627	1.50717	706.827	0	4.28884	700.074	-28.8375	shARL13b_2	VC2836	7.2372	698.74	698.739
Cell_06	9	2110.76	2113.47	-8.22623	-26.2891	1.42758	2123.4	0	3.18852	2112.15	-38.0813	shARL13b_2	VC2836	8.22623	1412.02	1412.02
Cell_06	9	2443.63	2444.59	-6.18135	-27.0583	0.417462	2451.73	0	3.86952	2444.2	-27.7487	shARL13b_2	VC2836	6.18135	332.87	332.87
Cell_06	9	3667.25	3669.48	-11.0484	-26.1583	0.817908	3684.89	0	4.18852	3668.68	-58.6529	shARL13b_2	VC2836	11.0484	1223.62	1223.62
Cell_06	9	13995	13997.3	-6.82884	-26.569	0.742437	14007.2	0	3.50606	13997	-30.4821	shARL13b_2	VC2836	6.82884	8140.02	8140.02
Cell_06	10	2360.76	2362.21	-11.9464	-26.2127	0.440647	2375.7	0	6.58225	2361.4	-80.6012	shARL13b_2	VC2836	11.9464	2360.76	2360.76
Cell_06	10	5796	5798.55	-8.65963	-26.0938	0.610273	5812.51	0	5.47154	5797.75	-53.2005	shARL13b_2	VC2836	8.65963	3435.24	3435.24
Cell_06	10	13739.3	13741.8	-8.93727	-26.8166	1.32842	13752.4	0	4.08342	13741.2	-51.2673	shARL13b_2	VC2836	8.93727	7943.3	7943.3
Cell_06	10	14513.6	14519.2	-10.9124	-25.5866	1.39824	14530.6	0	6.65298	14517	-73.2334	shARL13b_2	VC2836	10.9124	774.3	774.3
Cell_09	1	7871.92	7874.83	-13.1548	-43.9802	0.739987	7886.97	0	3.95801	7873.4	-69.2714	shARL13b_2	VC2836	13.1548	1020.42	1020.42
Cell_09	1	10327	10329.6	-10.7845	-43.4206	0.450602	10344	0	3.47781	10328.8	-62.4215	shARL13b_2	VC2836	10.7845	2455.08	2455.08
Cell_09	1	11031.4	11032.2	-7.304	-43.6174	0.215629	11039.9	0	3.73383	11031.8	-27.138	shARL13b_2	VC2836	7.304	704.4	704.4
Cell_09	2	11951.1	11953	-14.5135	-39.0816	1.15914	11959.9	0	3.99835	11951.7	-61.4469	shARL13b_2	VC2836	14.5135	106.3	106.3
Cell_09	2	19598.1	19599.7	-8.58136	-36.7004	0.856787	19607.1	0	2.49562	19599.1	-33.0621	shARL13b_2	VC2836	8.58136	4162.7	4162.7
Cell_09	3	6069.09	6071.28	-12.0318	-35.4226	0.739914	6084.82	0	4.29828	6070.25	-59.0193	shARL13b_2	VC2836	12.0318	2840.76	2840.76
Cell_09	3	10519	10520.2	-7.00451	-35.2013	0.682731	10525.5	0	1.53625	10519.8	-19.463	shARL13b_2	VC2836	7.00451	433.9	433.9
Cell_09	3	14131.7	14135.3	-7.15456	-34.2514	1.4998	14142.3	0	3.73113	14134	-30.2196	shARL13b_2	VC2836	7.15456	3612.7	3612.7
Cell_09	3	19763.3	19765.9	-15.0116	-34.4266	1.51725	19775.8	0	3.43852	19764.6	-66.5187	shARL13b_2	VC2836	15.0116	46	46
Cell_09	4	5895.35	5896.33	-9.5977	-33.7127	0.490495	5902.61	0	2.62345	5896.03	-34.0268	shARL13b_2	VC2836	9.5977	1568.51	1568.51
Cell_09	4	18920.8	18923.7	-7.6062	-31.2975	1.49166	18933.3	0	3.7477	18922.4	-34.6164	shARL13b_2	VC2836	7.6062	2790.9	2790.9
Cell_09	5	4406.75	4409.5	-10.5873	-31.5327	0.406711	4418.24	0	3.22256	4408.74	-44.631	shARL13b_2	VC2836	10.5873	1899.92	1899.92
Cell_09	5	5660.8	5662.58	-9.2995	-31.179	0.420874	5679.58	0	5.98824	5661.41	-62.2018	shARL13b_2	VC2836	9.2995	1254.05	1254.05
Cell_09	6	9751.04	9753.56	-9.46691	-30.5047	0.378413	9765.69	0	2.01298	9752.74	-43.5554	shARL13b_2	VC2836	9.46691	9751.04	9751.04
Cell_09	6	13552.8	13556.4	-12.1817	-30.0114	0.968388	13567.4	0	3.68285	13555.7	-55.1644	shARL13b_2	VC2836	12.1817	3801.76	3801.76
Cell_09	7	4708.18	4710.02	-16.467	-30.1272	0.95804	4721.09	0	4.20135	4709.45	-83.544	shARL13b_2	VC2836	16.467	2501.61	2501.61
Cell_09	7	14137.6	14139.3	-12.306	-30.6016	0.500551	14155.6	0	5.08433	14138.2	-81.3358	shARL13b_2	VC2836	12.306	8245.89	8245.89
Cell_09	7	16740.9	16743.4	-6.43314	-29.7118	1.37604	16749.7	0	3.64777	16742.1	-21.2885	shARL13b_2	VC2836	6.43314	2603.3	2603.3
Cell_09	7	17789.5	17791.2	-10.2808	-30.2278	0.378136	17802.2	0	4.04818	17789.9	-50.04	shARL13b_2	VC2836	10.2808	1048.6	1048.6
Cell_09	8	17219.6	17223.3	-10.73	-28.9611	0.85318	17231.4	0	6.22571	17222.5	-53.8408	shARL13b_2	VC2836	10.73	11664.5	11664.5
Cell_09	9	15425.3	15428.1	-10.6995	-29.9803	0.667472	15438.1	0	4.81989	15427.4	-50.2913	shARL13b_2	VC2836	10.6995	14625.2	14625.2
Cell_09	10	10406.8	10409.2	-10.4432	-29.6996	0.578126	10413.6	0	2.87964	10408.9	-27.2419	shARL13b_2	VC2836	10.4432	10406.8	10406.8
Cell_09	10	19449.1	19454.5	-12.133	-29.6026	2.28249	19468.5	0	5.65629	19452.5	-79.0938	shARL13b_2	VC2836	12.133	267.1	267.1
Cell_04	3	1956.79	1957.51	-12.2454	-49.1985	0.390844	1961.9	0	2.47045	1957.26	-28.0897	shARL13b_2	VC2837	12.2454	951.96	951.96
Cell_04	3	5558.04	5563.41	-7.16466	-49.5916	2.15914	5570.91	0	4.04545	5562.07	-48.9739	shARL13b_2	VC2837	7.16466	574.13	574.13
Cell_04	3	6845.58	6847.09	-9.24136	-50.2246	0.255183	6850.66	0	2.03355	6845.87	-36.2512	shARL13b_2	VC2837	9.24136	1287.54	1287.54
Cell_04	3	8741.51	8742.81	-20.7859	-47.256	0.527881	8751.05	0	2.758	8742.25	-68.4302	shARL13b_2	VC2837	20.7859	1895.93	1895.93
Cell_04	3	9703.19	9703.97	-8.94603	-47.8654	0.30922	9707.3	0	1.93532	9703.65	-18.9857	shARL13b_2	VC2837	8.94603	711.99	711.99
Cell_04	3	11546.1	11546.9	-23.6419	-46.2494	0.409796	11552	0	1.70352	11546.7	-46.3194	shARL13b_2	VC2837	23.6419	1552.41	1552.41
Cell_04	3	15836.7	15840.8	-8.71439	-44.4777	0.478101	15848.4	0	2.79115	15840.1	-18.8816	shARL13b_2	VC2837	8.71439	2793.8	2793.8
Cell_04	3	16604.5	16610.6	-12.4825	-44.9697	0.63688	16619	0	2.84171	16610.3	-36.8037	shARL13b_2	VC2837	12.4825	767.8	767.8
Cell_04	3	18246.6	18249.6	-8.35101	-43.8524	1.76386	18259.5	0	5.10161	18249	-46.0122	shARL13b_2	VC2837	8.35101	1642.1	1642.1
Cell_04	3	18524.5	18525.4	-7.47509	-44.8256	0.483148	18530.6	0	1.36561	18525.1	-16.0609	shARL13b_2	VC2837	7.47509	277.9	277.9
Cell_04	3	19229.3	19229.8	-8.30314	-46.5612	0.275008	19232.8	0	1.66148	19229.8	-15.7146	shARL13b_2	VC2837	8.30314	704.8	704.8
Cell_04	4	688.455	689.827	-38.4653	-46.7939	0.477499	703.304	0	2.30916	689.17	-126.995	shARL13b_2	VC2837	38.4653	688.46	688.455
Cell_04	4	1044.19	1051.74	-12.9135	-47.1329	0.805175	1059.42	0	3.01841	1050.47	-51.3216	shARL13b_2	VC2837	12.9135	355.74	355.735
Cell_04	4	2627.51	2629.54	-7.56172	-45.9049	1.3135	2643.92	0	3.29869	2628.2	-47.1076	shARL13b_2	VC2837	7.56172	1583.32	1583.32
Cell_04	4	9992.22	9993.5	-15.5485	-41.7695	0.428188	9996.99	0	2.16753	9993.15	-31.1852	shARL13b_2	VC2837	15.5485	972.57	972.57
Cell_04	4	13159	13163.5	-13.6071	-44.2541	0.472088	13171.4	0	2.64984	13162.2	-45.5774	shARL13b_2	VC2837	13.6071	1666.1	1666.1
Cell_04	4	13574.3	13576.6	-25.3762	-44.411	0.402544	13599.6	0	2.11445	13576.3	-110.654	shARL13b_2	VC2837	25.3762	415.3	415.3
Cell_04	4	18430.9	18434.2	-32.502	-43.0774	0.501264	18440.8	0	2.48675	18433.7	-85.3293	shARL13b_2	VC2837	32.502	3676.7	3676.7
Cell_04	4	19114.2	19117.8	-19.0545	-41.5472	0.533845	19134.9	0	2.7026	19117.3	-79.1028	shARL13b_2	VC2837	19.0545	683.3	683.3
Cell_04	10	5188.24	5189.3	-8.94979	-33.3718	0.314136	5194.43	0	2.32385	5188.72	-24.7857	shARL13b_2	VC2837	8.94979	1711.65	1711.65
Cell_04	10	7099.13	7102.62	-6.43778	-34.1868	0.95859	7110.42	0	2.5508	7102.01	-23.8588	shARL13b_2	VC2837	6.43778	1910.89	1910.89
Cell_04	10	11528.2	11531.9	-12.5586	-32.6438	1.40922	11543.9	0	8.05834	11531.2	-86.4977	shARL13b_2	VC2837	12.5586	1494.2	1494.2
Cell_04	10	13044.4	13047.1	-16.4225	-32.0515	0.783166	13054.6	0	3.05992	13046.2	-57.7755	shARL13b_2	VC2837	16.4225	1516.2	1516.2
Cell_09	1	508.711	511.672	-9.5777	-130.577	0.543811	521.849	0	7.15538	511.186	-58.3634	shARL13b_2	VC2837	9.5777	508.71	508.711
Cell_09	1	12919.3	12920	-6.40863	-130.176	0.343522	12932.5	0	3.24334	12919.9	-41.1651	shARL13b_2	VC2837	6.40863	1013.9	1013.9
Cell_09	2	3215.35	3220.99	-18.3575	-128.67	1.6805	3242.7	0	6.64622	3219.72	-140.795	shARL13b_2	VC2837	18.3575	228.09	228.09
Cell_09	2	13268.7	13275.5	-16.55	-127.224	0.58756	13293	0	4.06238	13274.5	-80.6708	shARL13b_2	VC2837	16.55	422.9	422.9
Cell_09	3	2782.91	2784.1	-15.8079	-127.02	0.514263	2794.86	0	5.33345	2783.66	-78.0816	shARL13b_2	VC2837	15.8079	146.33	146.33
Cell_09	3	11949	11953.6	-17.2622	-125.651	0.937473	11971.4	0	5.54567	11951.6	-123.568	shARL13b_2	VC2837	17.2622	871.6	871.6
Cell_09	3	17057.1	17059.1	-6.54374	-124.035	1.58387	17070.5	0	2.82343	17058.5	-38.1151	shARL13b_2	VC2837	6.54374	282.8	282.8
Cell_09	4	6375.07	6382	-7.67744	-124.195	0.849921	6394.97	0	4.04769	6381.17	-46.7626	shARL13b_2	VC2837	7.67744	1319.76	1319.76
Cell_09	4	12154.7	12155.8	-10.9226	-126.577	0.530789	12170.5	0	3.60323	12155.2	-64.2917	shARL13b_2	VC2837	10.9226	1310.8	1310.8
Cell_09	5	2193.73	2196.25	-26.8324	-123.301	0.678544	2210.66	0	3.51263	2195.21	-130.994	shARL13b_2	VC2837	26.8324	98.75	98.75
Cell_09	5	6791.13	6793.1	-10.1831	-122.421	0.408674	6804.04	0	4.21356	6791.73	-44.4206	shARL13b_2	VC2837	10.1831	508.42	508.42
Cell_09	5	12164.5	12165.4	-10.778	-122.535	0.529152	12177.1	0	3.56888	12165	-56.2159	shARL13b_2	VC2837	10.778	81.3	81.3
Cell_09	6	5508.18	5514.82	-10.2642	-121.522	1.84002	5538.93	0	5.00283	5513.51	-97.7301	shARL13b_2	VC2837	10.2642	619.18	619.18
Cell_09	6	14348.4	14349.6	-5.76424	-120.218	0.95062	14353.6	0	3.10875	14349	-14.6739	shARL13b_2	VC2837	5.76424	36.1	36.1
Cell_09	7	1205.63	1207.9	-7.37701	-119.283	1.29714	1223.06	0	4.95362	1206.47	-57.5066	shARL13b_2	VC2837	7.37701	394.43	394.427
Cell_09	7	5218.22	5220.49	-11.8624	-119.021	0.718235	5238.42	0	4.73331	5219.36	-75.3666	shARL13b_2	VC2837	11.8624	566.17	566.17
Cell_09	8	1770.57	1772.96	-12.7276	-116.075	1.94715	1785.01	0	5.12882	1771.06	-84.0594	shARL13b_2	VC2837	12.7276	365.89	365.89
Cell_09	8	6970.26	6972.66	-14.4571	-116.164	0.77227	6983.62	0	5.55741	6970.79	-110.463	shARL13b_2	VC2837	14.4571	1512.05	1512.05
Cell_09	9	3760.91	3763.46	-25.0804	-111.132	0.781695	3778.9	0	5.10251	3762.41	-161.861	shARL13b_2	VC2837	25.0804	689.83	689.83
Cell_09	9	12559.5	12561.3	-29.2338	-114.528	0.581577	12582.6	0	4.0057	12560.5	-160.806	shARL13b_2	VC2837	29.2338	524.3	524.3
Cell_09	10	3503.97	3507.12	-10.7669	-112.378	2.37753	3519.55	0	6.01952	3505.04	-73.7428	shARL13b_2	VC2837	10.7669	337.39	337.39
Cell_09	10	10363.5	10367	-8.26359	-111.86	1.07007	10375.9	0	4.29332	10365.6	-38.5057	shARL13b_2	VC2837	8.26359	416.34	416.34
Cell_09	10	18436.4	18438.4	-8.44955	-113.572	1.34257	18448.9	0	5.65596	18436.9	-61.6028	shARL13b_2	VC2837	8.44955	90.8	90.8
Cell_02	1	1267.29	1271.28	-8.96058	-28.5026	0.482116	1280.98	0	3.28678	1270.82	-35.882	CTL	VC2838	8.96058	190.65	190.65
Cell_02	1	7708.29	7711.67	-10.3793	-28.1155	0.860256	7722.65	0	3.59352	7710.34	-53.7744	CTL	VC2838	10.3793	4755.33	4755.33
Cell_02	1	17294.7	17298.3	-8.20159	-28.6268	0.9712	17304.4	0	3.52865	17297.4	-35.3628	CTL	VC2838	8.20159	4404.8	4404.8
Cell_02	2	4570.23	4572.46	-6.02652	-27.7989	1.39823	4575.2	0	2.15466	4571.24	-15.6539	CTL	VC2838	6.02652	2169.34	2169.34
Cell_02	2	6369.42	6370.81	-9.10539	-25.709	0.622942	6378.11	0	3.10724	6370.13	-30.9993	CTL	VC2838	9.10539	1319.68	1319.68
Cell_02	2	12383.8	12385.1	-10.2378	-26.9082	0.709871	12407.5	0	4.67195	12384.5	-101.408	CTL	VC2838	10.2378	66.7	66.7
Cell_02	3	3188.48	3190.2	-6.59645	-24.6536	1.33952	3197.79	0	4.27184	3189.47	-31.902	CTL	VC2838	6.59645	3188.48	3188.48
Cell_02	3	3347.13	3351.76	-7.36275	-24.8455	2.83726	3359.56	0	4.17082	3349.54	-36.4183	CTL	VC2838	7.36275	158.65	158.65
Cell_02	3	12391.7	12394.7	-7.3611	-23.913	1.7091	12407	0	4.7957	12392.3	-43.9454	CTL	VC2838	7.3611	2036.1	2036.1
Cell_02	3	16835.1	16842.4	-11.5839	-23.4622	1.04792	16850.1	0	4.68449	16841.5	-51.552	CTL	VC2838	11.5839	1000.3	1000.3
Cell_02	4	5786.08	5787.15	-7.02715	-24.7109	0.38569	5799.77	0	2.49829	5786.54	-35.9417	CTL	VC2838	7.02715	2160.06	2160.06
Cell_02	4	13206.1	13207.5	-7.15997	-23.2962	0.352487	13210.1	0	2.07053	13206.6	-14.9877	CTL	VC2838	7.15997	1953.3	1953.3
Cell_02	5	4819.81	4823.59	-9.95969	-21.4731	1.01081	4832.31	0	2.9428	4822.43	-43.2	CTL	VC2838	9.95969	1702.02	1702.02
Cell_02	6	5570.55	5571.81	-5.83241	-21.023	1.01605	5578.97	0	2.60414	5571.28	-25.2488	CTL	VC2838	5.83241	5570.55	5570.55
Cell_02	6	15473	15474.7	-12.7948	-19.1632	0.799451	15489.3	0	5.95716	15473.7	-72.6607	CTL	VC2838	12.7948	2006.5	2006.5
Cell_02	7	13447.5	13449.2	-6.6862	-18.3926	0.578561	13461.1	0	1.57772	13448.7	-23.1412	CTL	VC2838	6.6862	1106.5	1106.5
Cell_02	7	18008.2	18009.9	-7.95539	-17.7219	0.985745	18015.4	0	3.37617	18009.1	-28.4874	CTL	VC2838	7.95539	941.7	941.7
Cell_02	8	5329.35	5330.67	-10.9838	-18.673	0.550456	5342.15	0	3.63613	5329.91	-55.2069	CTL	VC2838	10.9838	2318.33	2318.33
Cell_02	8	13390.5	13394.3	-7.31218	-16.9431	2.43321	13401.8	0	7.05303	13392.1	-34.9995	CTL	VC2838	7.31218	1203	1203
Cell_02	8	19614.6	19615.9	-5.85065	-17.6783	0.661342	19623.6	0	3.77506	19615.2	-22.7021	CTL	VC2838	5.85065	486.5	486.5
Cell_02	9	12703.4	12707.4	-6.59631	-17.2133	0.957418	12728.6	0	2.29032	12706.4	-42.3904	CTL	VC2838	6.59631	4981.74	4981.74
Cell_02	10	6107.01	6109.67	-8.18021	-17.4786	2.34492	6119.02	0	4.45421	6107.58	-50.4488	CTL	VC2838	8.18021	3706.53	3706.53
Cell_02	10	13944.7	13945.9	-6.51074	-16.8226	0.697317	13953.4	0	3.96857	13945.1	-29.2505	CTL	VC2838	6.51074	87.6	87.6
Cell_04	1	4836.81	4844.59	-19.4037	-35.6436	2.0558	4866.4	0	6.13338	4842.74	-137.005	CTL	VC2838	19.4037	2577.51	2577.51
Cell_04	1	11583.6	11585.7	-7.44408	-34.9444	1.72456	11595.4	0	4.29405	11584.4	-36.3037	CTL	VC2838	7.44408	372.3	372.3
Cell_04	1	16793.1	16794.8	-6.91804	-35.3729	1.31738	16808.4	0	4.42697	16793.8	-48.2919	CTL	VC2838	6.91804	2157.7	2157.7
Cell_04	2	10007.9	10009.5	-12.6131	-33.2539	1.1195	10021.2	0	2.97208	10008.8	-63.4085	CTL	VC2838	12.6131	1909.48	1909.48
Cell_04	2	18200.4	18205.8	-8.84803	-31.6975	2.58438	18211.1	0	4.37904	18205.1	-33.0792	CTL	VC2838	8.84803	1665.5	1665.5
Cell_04	5	13179.6	13182.3	-11.5784	-28.8022	1.5262	13196.1	0	6.57596	13180.3	-91.7194	CTL	VC2838	11.5784	2054.5	2054.5
Cell_04	6	4492.69	4496.48	-6.74728	-25.7658	0.736497	4505.35	0	3.16316	4494.76	-26.5269	CTL	VC2838	6.74728	194.26	194.26
Cell_04	6	10440.9	10444.2	-11.0351	-24.4812	1.41162	10454.5	0	5.62729	10442.6	-51.7475	CTL	VC2838	11.0351	5551.38	5551.38
Cell_04	6	13731	13736.2	-10.7037	-25.2765	0.830852	13746.8	0	3.09079	13735.2	-44.6477	CTL	VC2838	10.7037	781.9	781.9
Cell_04	6	19380.3	19385	-9.36718	-24.1042	1.52353	19391.6	0	4.73996	19382.9	-42.873	CTL	VC2838	9.36718	5649.3	5649.3
Cell_04	8	2110.73	2115.87	-8.97056	-24.11	1.64424	2121.8	0	7.27944	2112.76	-36.9018	CTL	VC2838	8.97056	194.6	194.6
Cell_04	8	6282.51	6285.03	-9.94611	-27.7004	1.75553	6289.92	0	4.2771	6283.67	-39.5765	CTL	VC2838	9.94611	765.3	765.3
Cell_04	8	11761.4	11763.9	-11.7628	-25.9138	1.51358	11780.8	0	7.3301	11762.2	-96.8481	CTL	VC2838	11.7628	4004.28	4004.28
Cell_04	8	14627.5	14631.1	-10.5061	-24.5889	1.37456	14640.7	0	5.47397	14630.3	-55.4227	CTL	VC2838	10.5061	146.4	146.4
Cell_04	8	18653.4	18657.9	-19.2907	-24.7215	0.787441	18674.8	0	6.38544	18657.3	-130.064	CTL	VC2838	19.2907	668.1	668.1
Cell_04	8	19968	19971.2	-14.1154	-25.0507	1.26048	19984.8	0	5.4505	19970.3	-94.7977	CTL	VC2838	14.1154	567.7	567.7
Cell_04	9	3437.34	3438.74	-7.3259	-26.4511	0.496592	3448.21	0	3.16706	3438.08	-32.8298	CTL	VC2838	7.3259	502.25	502.25
Cell_04	9	4177.21	4178.76	-6.60574	-24.6381	0.968901	4189.56	0	4.96556	4178.12	-39.8736	CTL	VC2838	6.60574	93.64	93.64
Cell_04	9	8258.4	8263.53	-8.02134	-24.4062	1.54198	8274.11	0	3.2193	8262.81	-30.4324	CTL	VC2838	8.02134	2819.86	2819.86
Cell_04	9	11794.7	11796.9	-15.1045	-25.7646	1.24863	11807.7	0	5.22681	11795.5	-83.487	CTL	VC2838	15.1045	69.7	69.7
Cell_04	9	15721.5	15727.7	-12.9238	-23.3491	1.78957	15734.2	0	6.05103	15726.1	-53.4389	CTL	VC2838	12.9238	1519.4	1519.4
Cell_04	10	12297.2	12301.3	-13.3992	-20.6644	0.941242	12319.2	0	5.59138	12298.8	-80.4595	CTL	VC2838	13.3992	400.4	400.4
Cell_04	10	18660.6	18663.5	-9.38681	-21.2465	1.62368	18672.7	0	5.75887	18661.4	-48.1761	CTL	VC2838	9.38681	74.8	74.8
Cell_06	1	5828	5831.54	-13.6742	-44.2173	1.10646	5838.48	0	2.7736	5830.6	-45.8876	shARL13b_2	VC2838	13.6742	2968.09	2968.09
Cell_06	1	8329.23	8332.72	-7.5548	-43.3361	1.0254	8340.41	0	2.13284	8331.97	-21.9542	shARL13b_2	VC2838	7.5548	1256.72	1256.72
Cell_06	1	12466.4	12467.9	-11.5601	-43.3228	0.77038	12476.9	0	6.1113	12467.1	-70.5068	shARL13b_2	VC2838	11.5601	355.8	355.8
Cell_06	2	8232.9	8238.54	-6.69062	-41.3011	1.75525	8248.28	0	4.42526	8236.77	-44.2814	shARL13b_2	VC2838	6.69062	3922.42	3922.42
Cell_06	2	12530.6	12532.1	-6.60275	-41.2303	1.17145	12539.2	0	2.7021	12531.4	-24.0078	shARL13b_2	VC2838	6.60275	1251.6	1251.6
Cell_06	2	14813.3	14815.5	-5.86779	-41.1291	1.3387	14823.6	0	4.03736	14813.7	-26.7264	shARL13b_2	VC2838	5.86779	2282.7	2282.7
Cell_06	3	8170.69	8172.56	-6.26662	-38.9542	1.2617	8176.7	0	3.02022	8171.41	-20.8272	shARL13b_2	VC2838	6.26662	180.03	180.03
Cell_06	4	2470.96	2474.18	-9.18612	-36.3331	1.83097	2480.74	0	2.83122	2472.12	-33.8543	shARL13b_2	VC2838	9.18612	2470.96	2470.96
Cell_06	4	5856.94	5859.53	-7.38902	-38.8999	2.47781	5865.44	0	2.29	5858.75	-27.7011	shARL13b_2	VC2838	7.38902	453.74	453.74
Cell_06	4	11793.8	11797	-16.0355	-36.6684	1.40238	11810.8	0	7.12766	11795.2	-111.749	shARL13b_2	VC2838	16.0355	1108.4	1108.4
Cell_06	5	1803.99	1807.55	-6.59246	-34.2338	1.46477	1814.3	0	6.02916	1806.43	-29.9059	shARL13b_2	VC2838	6.59246	1083.41	1083.41
Cell_06	5	10254.8	10257.8	-9.12922	-33.3022	1.83531	10266.9	0	3.93611	10256	-42.3138	shARL13b_2	VC2838	9.12922	584.26	584.26
Cell_06	6	729.827	732.417	-5.48344	-32.6755	1.21804	739.315	0	4.33472	730.337	-28.3049	shARL13b_2	VC2838	5.48344	729.83	729.827
Cell_06	6	9741.23	9742.96	-14.1526	-31.947	0.546433	9758.69	0	4.9628	9742.06	-86.3299	shARL13b_2	VC2838	14.1526	463.94	463.94
Cell_06	6	11688.1	11689.5	-5.87977	-31.7296	0.704439	11695.3	0	2.37156	11688.8	-18.3038	shARL13b_2	VC2838	5.87977	1211	1211
Cell_06	7	1522.98	1525.42	-8.09242	-30.6586	1.92713	1532.61	0	3.28534	1524.66	-32.0817	shARL13b_2	VC2838	8.09242	871.88	871.88
Cell_06	7	14708.7	14709.9	-8.52604	-30.4571	0.751885	14718.7	0	4.94354	14709.4	-39.641	shARL13b_2	VC2838	8.52604	7722.57	7722.57
Cell_06	8	4531.94	4534.47	-17.8735	-29.8558	0.887054	4554.64	0	4.36419	4533.96	-98.7324	shARL13b_2	VC2838	17.8735	2681.52	2681.52
Cell_06	8	8290.36	8294.13	-38.6004	-30.0029	1.12398	8312.13	0	4.908	8293.13	-221.903	shARL13b_2	VC2838	38.6004	750.47	750.47
Cell_06	8	12234.3	12236.7	-7.2169	-29.4893	1.30355	12245.4	0	4.39391	12235.7	-34.5744	shARL13b_2	VC2838	7.2169	3012.32	3012.32
Cell_06	9	991.295	993.152	-7.35924	-29.5298	0.908185	1000.05	0	3.20237	992.206	-33.0145	shARL13b_2	VC2838	7.35924	991.3	991.295
Cell_06	9	15118.2	15120.4	-7.35926	-28.9624	0.718069	15129.7	0	4.78829	15119.5	-42.761	shARL13b_2	VC2838	7.35926	319	319
Cell_06	10	10466.6	10469.4	-7.255	-27.7483	1.61144	10477.4	0	3.44707	10468.1	-30.9188	shARL13b_2	VC2838	7.255	3958.17	3958.17
Cell_06	10	15661.4	15663.3	-6.56302	-27.3602	1.53712	15675.6	0	5.89163	15661.9	-39.6081	shARL13b_2	VC2838	6.56302	2028.5	2028.5
Cell_02	1	3501.91	3506.32	-7.29353	-25.9521	1.29061	3515.13	0	3.65482	3504.86	-29.2178	CTL	VC2839	7.29353	3501.91	3501.91
Cell_02	1	9851.92	9855.54	-7.99864	-22.4394	0.588923	9859.51	0	2.49627	9855	-15.6638	CTL	VC2839	7.99864	4614.81	4614.81
Cell_02	1	18175.7	18178.1	-8.02124	-20.7078	1.76891	18188.8	0	4.14008	18176.7	-38.4476	CTL	VC2839	8.02124	1940.2	1940.2
Cell_02	2	3345.81	3348.36	-7.89769	-17.4012	1.50923	3354.13	0	3.13006	3347.42	-25.2837	CTL	VC2839	7.89769	799.17	799.17
Cell_02	2	12826.3	12828.4	-12.4234	-14.3708	0.489089	12840.3	0	4.11957	12827.3	-56.2212	CTL	VC2839	12.4234	7020.79	7020.79
Cell_02	3	3495.7	3498.53	-11.3542	-11.9735	0.857571	3511.47	0	5.74742	3497.58	-70.2768	CTL	VC2839	11.3542	3495.7	3495.7
Cell_02	3	13170.6	13172.3	-21.0958	-10.2513	0.95152	13189.1	0	4.26351	13171.4	-120.353	CTL	VC2839	21.0958	5151.46	5151.46
Cell_02	3	19558.8	19560.1	-8.45115	-9.7921	0.295171	19566.1	0	3.83975	19559.2	-34.3112	CTL	VC2839	8.45115	3376.9	3376.9
Cell_02	4	19531.7	19533.1	-30.8043	-4.98655	0.502328	19550.2	0	3.36266	19532.5	-143.794	CTL	VC2839	30.8043	1954.4	1954.4
Cell_02	5	6966.79	6969.26	-7.14186	-2.52561	0.907184	6973.62	0	2.82832	6967.56	-23.813	CTL	VC2839	7.14186	724.94	724.94
Cell_02	6	4548.59	4554.66	-22.3252	0.511515	0.748989	4564.09	0	3.77138	4554.14	-100.261	CTL	VC2839	22.3252	137.71	137.71
Cell_02	6	6650.66	6652.34	-7.64736	0.341587	0.367894	6662.59	0	3.25089	6651.2	-28.1677	CTL	VC2839	7.64736	1116.81	1116.81
Cell_02	6	10978.1	10980.3	-13.5189	-0.677668	1.02215	10987.5	0	3.31057	10979.6	-51.2927	CTL	VC2839	13.5189	1428.85	1428.85
Cell_02	6	14174	14176.7	-7.97816	0.348685	1.66038	14184.8	0	5.47373	14175.2	-42.8971	CTL	VC2839	7.97816	1582.9	1582.9
Cell_02	7	3387.67	3389.75	-20.6492	1.808	0.53734	3398.89	0	2.55263	3389.28	-73.904	CTL	VC2839	20.6492	3387.67	3387.67
Cell_02	7	7805.39	7810.05	-13.9587	2.83801	0.963968	7822.34	0	4.62833	7808.71	-80.7181	CTL	VC2839	13.9587	1852.08	1852.08
Cell_02	7	15240.9	15244.8	-20.3033	4.62973	1.68959	15256.7	0	6.03467	15243	-124.748	CTL	VC2839	20.3033	703.3	703.3
Cell_02	8	6209.17	6211.05	-12.7294	5.91169	1.47031	6218.74	0	2.87642	6209.8	-40.7565	CTL	VC2839	12.7294	716.87	716.87
Cell_02	9	2903.79	2906.07	-11.9317	6.65228	0.696747	2917.57	0	4.64321	2904.47	-62.8619	CTL	VC2839	11.9317	2903.79	2903.79
Cell_02	9	6928.1	6931.27	-9.59443	8.46543	0.83766	6942.6	0	5.19053	6929.34	-61.6687	CTL	VC2839	9.59443	1914.93	1914.93
Cell_02	10	12872.4	12875.4	-9.58314	7.95374	1.18523	12882.5	0	4.68455	12874	-45.5058	CTL	VC2839	9.58314	4204.92	4204.92
Cell_02	10	12958.2	12961.8	-13.5052	6.68175	0.426188	12968.3	0	3.25324	12960.9	-54.4142	CTL	VC2839	13.5052	85.8	85.8
Cell_02	6	2207.99	2210.65	-6.85881	-1.13641	1.13512	2214.43	0	3.26544	2209.66	-21.831	CTL	VC2839	6.85881	2207.99	2207.99
Cell_05	3	3395.68	3397.15	-13.7864	-9.71206	0.544096	3408.34	0	3.21365	3396.61	-58.2035	CTL	VC2839	13.7864	3395.68	3395.68
Cell_05	3	6167.02	6168.66	-10.5927	-9.10935	0.406033	6177.19	0	3.35953	6168.04	-48.2888	CTL	VC2839	10.5927	436.98	436.98
Cell_05	4	13742.1	13743	-9.14406	-7.92113	0.490061	13756	0	4.73485	13742.6	-52.7829	CTL	VC2839	9.14406	3230.5	3230.5
Cell_05	5	3879.89	3881.23	-9.90619	-9.64913	0.604983	3891.49	0	2.38948	3880.62	-37.0503	CTL	VC2839	9.90619	3879.89	3879.89
Cell_05	5	9002.05	9003.75	-7.46176	-6.44184	0.687826	9011.48	0	3.80216	9002.62	-27.752	CTL	VC2839	7.46176	5122.16	5122.16
Cell_05	5	17255	17258.5	-6.49108	-6.06375	0.899165	17264.3	0	3.84715	17257.7	-27.3272	CTL	VC2839	6.49108	8252.95	8252.95
Cell_05	6	506.561	508.873	-9.78165	-5.05602	1.1662	517.052	0	3.21481	507.564	-38.1979	CTL	VC2839	9.78165	506.56	506.561
Cell_05	6	5008.85	5009.75	-8.94598	-5.18347	0.470576	5018.09	0	2.42991	5009.49	-35.2932	CTL	VC2839	8.94598	4502.29	4502.29
Cell_05	6	11275.9	11279.2	-7.22863	-5.00242	1.63246	11282.1	0	2.65819	11278.1	-16.8652	CTL	VC2839	7.22863	981.4	981.4
Cell_05	7	5149.08	5151.91	-14.3273	-3.29964	0.580584	5157.62	0	2.43366	5151.38	-40.5259	CTL	VC2839	14.3273	2902.77	2902.77
Cell_05	7	6285.29	6287.23	-10.4826	-4.28182	0.966978	6298.02	0	2.88848	6286.22	-56.5581	CTL	VC2839	10.4826	1136.21	1136.21
Cell_05	7	6549.6	6554.96	-9.53919	-3.83343	1.95758	6559.06	0	2.40959	6554.19	-26.2308	CTL	VC2839	9.53919	264.31	264.31
Cell_05	9	1967.18	1968.51	-16.3527	0.84995	0.572567	1979.16	0	3.0757	1968.15	-61.8078	CTL	VC2839	16.3527	1967.18	1967.18
Cell_05	9	6272.12	6274.03	-12.5264	-0.516717	1.04303	6285.73	0	3.63858	6273.05	-57.7687	CTL	VC2839	12.5264	2058.53	2058.53
Cell_05	9	7533.16	7534.52	-8.15981	0.219211	0.468901	7544.21	0	2.30562	7533.78	-27.509	CTL	VC2839	8.15981	1261.04	1261.04
Cell_05	9	13991.3	13992.3	-6.51766	1.07341	0.483327	13998.6	0	3.58071	13992	-22.3769	CTL	VC2839	6.51766	845.7	845.7
Cell_05	9	14507	14508.4	-9.10233	1.13151	0.693116	14516.4	0	3.26171	14508	-30.3068	CTL	VC2839	9.10233	54.3	54.3
Cell_05	9	15619	15621.1	-6.25791	0.685646	1.14621	15627	0	3.86839	15619.9	-24.7443	CTL	VC2839	6.25791	1112	1112
Cell_05	10	6039.92	6041.49	-7.70941	-0.950915	0.9184	6046.76	0	2.40941	6040.93	-22.1886	CTL	VC2839	7.70941	6039.92	6039.92
Cell_05	10	9802.08	9803.75	-5.60792	-0.183984	1.13797	9808.81	0	2.18091	9802.8	-16.3771	CTL	VC2839	5.60792	3762.16	3762.16
Cell_05	10	11033.9	11041.2	-14.2255	-0.00768801	2.00626	11058.1	0	7.05942	11037.4	-128.744	CTL	VC2839	14.2255	1231.82	1231.82
Cell_05	10	16050.6	16055.6	-9.15661	0.221191	0.735857	16064.5	0	2.33412	16054.8	-37.4044	CTL	VC2839	9.15661	5016.7	5016.7
Cell_05	10	18188.7	18189.5	-10.6715	-0.369652	0.464025	18200.7	0	2.90066	18189.2	-45.1792	CTL	VC2839	10.6715	1910.8	1910.8
Cell_03	1	2888.21	2888.88	-7.44233	-55.7961	0.424816	2896.72	0	1.76336	2888.79	-31.2467	shARL13b_2	VC2839	7.44233	160.85	160.85
Cell_03	1	10163.2	10165.3	-12.2099	-55.3802	0.364393	10174.4	0	3.72526	10165	-47.0169	shARL13b_2	VC2839	12.2099	982.45	982.45
Cell_03	2	7142.32	7148.61	-7.34435	-53.9285	1.38	7161.77	0	2.90526	7147.16	-47.7032	shARL13b_2	VC2839	7.34435	2504.45	2504.45
Cell_03	2	14227.1	14229.2	-29.0996	-52.9678	0.759172	14253.2	0	5.99575	14228	-196.878	shARL13b_2	VC2839	29.0996	1200	1200
Cell_03	2	18853	18855.3	-14.2541	-52.8537	0.627674	18864.9	0	4.00007	18853.5	-66.9725	shARL13b_2	VC2839	14.2541	2565.5	2565.5
Cell_03	4	18336.6	18337.8	-6.77857	-50.704	0.539756	18347.1	0	2.14194	18337.1	-26.9194	shARL13b_2	VC2839	6.77857	304.1	304.1
Cell_03	5	9621.49	9623.39	-11.1768	-49.962	0.438026	9636.82	0	2.16489	9622.85	-56.7069	shARL13b_2	VC2839	11.1768	917.73	917.73
Cell_03	5	17846.1	17850.5	-13.0056	-48.8656	0.902034	17857.5	0	4.20221	17849.7	-49.1617	shARL13b_2	VC2839	13.0056	1953.5	1953.5
Cell_03	8	11835.5	11837.4	-14.6258	-46.5802	0.623989	11856.2	0	3.68068	11836.3	-107.235	shARL13b_2	VC2839	14.6258	3008.58	3008.58
Cell_03	8	17099.6	17104.1	-15.0574	-44.9702	1.46603	17114.7	0	3.49587	17102.7	-55.9513	shARL13b_2	VC2839	15.0574	469.8	469.8
Cell_03	9	3093.8	3094.83	-12.4883	-44.6522	0.567465	3106.7	0	2.19921	3094.51	-46.8783	shARL13b_2	VC2839	12.4883	346.94	346.94
Cell_03	10	6786.14	6787.9	-8.48754	-43.4777	0.842276	6798.35	0	4.44441	6787.39	-33.7258	shARL13b_2	VC2839	8.48754	1468.18	1468.18
Cell_03	11	3131.17	3135.62	-9.20158	-41.4086	0.975189	3148.96	0	4.60156	3134.61	-59.1991	shARL13b_2	VC2839	9.20158	539.31	539.31
Cell_03	12	1525.45	1527.42	-10.4327	-41.8011	0.805606	1535.21	0	3.09443	1526.18	-42.7041	shARL13b_2	VC2839	10.4327	1525.45	1525.45
Cell_03	12	17476.7	17478.4	-14.6254	-41.0934	1.02633	17495.3	0	4.99301	17477.8	-92.4282	shARL13b_2	VC2839	14.6254	2045.8	2045.8
Cell_03	13	4279.25	4283.73	-5.63324	-41.2476	0.414275	4293.79	0	2.80502	4283.3	-35.9113	shARL13b_2	VC2839	5.63324	369.27	369.27
Cell_03	13	11122	11126.2	-11.1916	-39.6628	1.13445	11137.1	0	2.94957	11124.9	-47.5059	shARL13b_2	VC2839	11.1916	2732.66	2732.66
Cell_03	13	13849.1	13849.9	-12.786	-39.4722	0.462158	13861.7	0	3.38076	13849.7	-57.7242	shARL13b_2	VC2839	12.786	576.1	576.1
Cell_03	14	4176.07	4180.15	-13.4511	-39.0145	2.38101	4191.44	0	6.71653	4178.03	-102.69	shARL13b_2	VC2839	13.4511	983.22	983.22
Cell_03	14	7984.22	7986.2	-18.5826	-38.2042	0.869836	7991.9	0	3.50329	7985.08	-61.8479	shARL13b_2	VC2839	18.5826	964.57	964.57
Cell_03	14	12342.9	12345.7	-6.01549	-39.1687	2.17148	12355.3	0	4.43514	12343.4	-34.1306	shARL13b_2	VC2839	6.01549	106.4	106.4
Cell_03	14	14024.5	14026.3	-10.9887	-38.4132	0.7972	14036.2	0	4.12723	14025.3	-56.0764	shARL13b_2	VC2839	10.9887	123.6	123.6
Cell_03	14	19266.9	19269.2	-7.40641	-37.1552	1.53913	19276.2	0	5.41922	19267.8	-30.8834	shARL13b_2	VC2839	7.40641	36.5	36.5
Cell_06	1	13174.3	13176.9	-5.62446	-10.4338	1.01477	13187.5	0	3.21119	13175.4	-26.744	shARL13b_2	VC2839	5.62446	12550.6	12550.7
Cell_06	2	15961	15963.8	-10.2052	-3.92402	0.44877	15972.8	0	1.83239	15963.1	-26.2381	shARL13b_2	VC2839	10.2052	11252	11252
Cell_06	2	18359.9	18362.4	-15.2542	-3.55667	1.02656	18369.2	0	2.74207	18361.5	-49.7704	shARL13b_2	VC2839	15.2542	2398.9	2398.9
Cell_06	3	7821.08	7822.84	-7.50868	-0.785528	1.14096	7831.98	0	3.86055	7822.46	-38.3411	shARL13b_2	VC2839	7.50868	7821.08	7821.08
Cell_06	3	7928.24	7929.42	-19.4286	-1.26811	0.434982	7940.27	0	2.41565	7928.87	-74.2406	shARL13b_2	VC2839	19.4286	107.16	107.16
Cell_06	3	9433.74	9439.24	-7.24166	2.27969	1.72503	9443.85	0	2.80265	9437.73	-18.0864	shARL13b_2	VC2839	7.24166	1505.5	1505.5
Cell_06	3	19751.3	19752.9	-6.75093	2.80205	0.573185	19760	0	1.95975	19752	-18.4681	shARL13b_2	VC2839	6.75093	10317.6	10317.6
Cell_06	4	6299.71	6303.02	-11.4118	4.48453	1.07466	6313.72	0	4.56819	6302.18	-50.0221	shARL13b_2	VC2839	11.4118	6299.71	6299.71
Cell_06	5	4701.62	4702.82	-9.38934	6.77118	0.586687	4709.28	0	1.51822	4702.52	-18.071	shARL13b_2	VC2839	9.38934	4701.62	4701.62
Cell_06	5	11373.3	11375.2	-7.67311	7.14268	1.18564	11383.6	0	1.77525	11374.4	-30.491	shARL13b_2	VC2839	7.67311	2128.49	2128.49
Cell_06	5	11732.4	11734.5	-7.83549	6.77967	1.25256	11740.9	0	2.85518	11734.1	-29.4105	shARL13b_2	VC2839	7.83549	359.1	359.1
Cell_06	6	10550.4	10551.6	-11.2584	9.84863	0.414389	10563.8	0	2.91166	10551.3	-43.8492	shARL13b_2	VC2839	11.2584	10550.4	10550.4
Cell_06	7	1627.8	1628.79	-9.51356	11.6622	0.642813	1642.58	0	2.29966	1628.27	-50.1525	shARL13b_2	VC2839	9.51356	1627.8	1627.8
Cell_06	7	8465.17	8466.28	-8.21633	10.9942	0.484096	8481.5	0	2.36408	8465.62	-45.3681	shARL13b_2	VC2839	8.21633	5320.39	5320.39
Cell_06	7	14996.1	14998	-9.49161	11.9029	1.39622	15006.7	0	2.50223	14997	-35.6738	shARL13b_2	VC2839	9.49161	6530.93	6530.93
Cell_06	7	18922.6	18924.3	-21.0533	13.4425	0.871244	18933.1	0	3.48452	18923.5	-87.1241	shARL13b_2	VC2839	21.0533	3926.5	3926.5
Cell_06	8	16236	16237.5	-5.61646	14.2107	1.09916	16243	0	3.60266	16237	-17.0545	shARL13b_2	VC2839	5.61646	16236	16236
Cell_06	9	9454.51	9456.44	-9.06149	14.6037	0.573843	9465.74	0	4.44228	9455.09	-49.5715	shARL13b_2	VC2839	9.06149	9454.51	9454.51
Cell_06	9	9639.33	9641.39	-7.929	16.4009	0.368669	9649.78	0	3.42283	9641.12	-29.3053	shARL13b_2	VC2839	7.929	184.82	184.82
Cell_06	9	10130.9	10132.3	-7.97459	15.1585	0.818804	10137.6	0	3.52908	10131.5	-26.1748	shARL13b_2	VC2839	7.97459	207.31	207.31
Cell_06	9	16769.5	16771.2	-22.4507	15.8407	0.605598	16782.8	0	3.51275	16770.3	-107.493	shARL13b_2	VC2839	22.4507	6638.6	6638.6
Cell_06	10	3890.47	3893.03	-13.3547	17.0535	0.839026	3902.93	0	3.74526	3891.3	-69.1081	shARL13b_2	VC2839	13.3547	341.77	341.77
Cell_06	10	19472.9	19474.7	-8.72354	17.9158	0.620305	19480.5	0	3.73111	19473.4	-30.0322	shARL13b_2	VC2839	8.72354	4790.2	4790.2
Cell_07	8	8713.23	8717.42	-13.8069	10.0417	1.17535	8721.95	0	2.01832	8716.88	-37.8947	shARL13b_2	VC2839	13.8069	4348.53	4348.53
Cell_07	9	5561.08	5563.61	-14.4823	10.2711	1.27104	5575	0	3.44976	5562.7	-67.5011	shARL13b_2	VC2839	14.4823	4608.46	4608.46
Cell_07	9	6243.7	6244.44	-19.966	9.63918	0.375936	6251.33	0	1.95553	6244.18	-45.4553	shARL13b_2	VC2839	19.966	682.62	682.62
Cell_07	10	18188.5	18191.3	-13.5924	13.3971	0.788902	18203.4	0	4.49206	18189.4	-70.0545	shARL13b_2	VC2839	13.5924	3005.2	3005.2
Cell_07	16	5253.08	5256.09	-9.78691	19.4612	1.43352	5271.89	0	6.54674	5255.35	-60.0491	shARL13b_2	VC2839	9.78691	52.42	52.42
Cell_07	16	9328.24	9330.47	-12.5929	21.1751	0.975711	9339.12	0	2.09331	9329.69	-41.3059	shARL13b_2	VC2839	12.5929	855.49	855.49
Cell_07	16	11639.2	11641.1	-19.4694	20.0982	0.44091	11647.8	0	1.79148	11640.8	-50.4589	shARL13b_2	VC2839	19.4694	719.1	719.1
Cell_07	17	10844.9	10845.9	-25.4971	21.7254	0.443791	10858	0	2.27116	10845.5	-79.9095	shARL13b_2	VC2839	25.4971	341.7	341.7
Cell_07	18	3599.81	3600.7	-12.5072	22.725	0.559538	3605.23	0	1.33477	3600.37	-24.3568	shARL13b_2	VC2839	12.5072	3091.02	3091.02
Cell_07	19	4075.7	4076.58	-11.4786	21.1652	0.451372	4080.7	0	1.66169	4076.36	-21.4609	shARL13b_2	VC2839	11.4786	522.64	522.64
Cell_07	19	8104.15	8105.37	-14.5784	22.7815	0.585371	8110.53	0	2.09091	8104.87	-33.6402	shARL13b_2	VC2839	14.5784	298.37	298.37
Cell_07	19	8130.42	8131.17	-8.98952	21.5448	0.447147	8134.81	0	1.20632	8130.9	-14.8396	shARL13b_2	VC2839	8.98952	26.27	26.27
Cell_07	19	13991.5	13992.3	-7.82667	17.9404	0.378381	13995.8	0	1.6279	13992	-17.9613	shARL13b_2	VC2839	7.82667	5861.08	5861.08
Cell_07	20	15710.3	15711.7	-9.39311	23.004	0.546632	15714.6	0	1.72362	15711.2	-18.8092	shARL13b_2	VC2839	9.39311	7194.49	7194.49
Cell_07	21	16337.1	16338.9	-11.4817	25.8739	0.738105	16344.4	0	1.96654	16338.5	-25.4687	shARL13b_2	VC2839	11.4817	6215.2	6215.2
Cell_07	21	16429	16432.1	-8.89077	25.1569	0.447967	16434.8	0	2.11969	16431.1	-22.3321	shARL13b_2	VC2839	8.89077	91.9	91.9
Cell_07	22	8116.43	8117.37	-24.0443	25.5215	0.480457	8123.83	0	2.33956	8117.09	-64.0558	shARL13b_2	VC2839	24.0443	8116.43	8116.43
Cell_07	22	9357.91	9358.86	-12.7463	26.8516	0.431226	9364.93	0	1.59885	9358.47	-27.3768	shARL13b_2	VC2839	12.7463	1241.48	1241.48
Cell_07	22	10474	10475	-14.9536	27.6983	0.495237	10481.8	0	1.98592	10474.6	-36.5617	shARL13b_2	VC2839	14.9536	1116.09	1116.09
Cell_07	22	16734.3	16735.4	-21.2794	29.275	0.416584	16741.4	0	1.99901	16734.9	-49.544	shARL13b_2	VC2839	21.2794	2206.4	2206.4
Cell_07	23	7778.27	7780.25	-7.4759	29.1983	0.980574	7791.2	0	2.90033	7779.11	-34.9448	shARL13b_2	VC2839	7.4759	3132.45	3132.45
Cell_07	24	12127.8	12131.2	-7.839	29.2746	1.53795	12137.9	0	2.94491	12129.8	-28.1353	shARL13b_2	VC2839	7.839	466.3	466.3
Cell_07	23	16293.9	16295.9	-15.4334	28.5688	0.402373	16308.2	0	1.90884	16295.7	-42.8531	shARL13b_2	VC2839	15.4334	2063.6	2063.6
Cell_01	1	4310.94	4311.52	-7.08525	-53.3393	0.433196	4315.33	0	3.85612	4311.51	-6.92907	CTL	VC2840	7.08525	26.85	26.85
Cell_01	1	19461.1	19464.3	-22.2613	-44.5722	0.42066	19474.2	0	1.89861	19464	-65.0889	CTL	VC2840	22.2613	11525.8	11525.8
Cell_01	2	2377.19	2380.8	-8.63224	-40.0978	0.879446	2397.55	0	6.48947	2379.79	-67.9362	CTL	VC2840	8.63224	2377.19	2377.19
Cell_01	2	4100.71	4102.77	-8.49664	-38.9031	1.36326	4107.13	0	2.87895	4102.38	-21.5545	CTL	VC2840	8.49664	1723.52	1723.52
Cell_01	2	15408.9	15409.9	-8.23572	-35.9415	0.348413	15417.9	0	1.76563	15409.5	-21.3118	CTL	VC2840	8.23572	2485	2485
Cell_01	2	15605.2	15608.3	-6.2272	-35.8623	1.3749	15613	0	2.69405	15607.5	-19.184	CTL	VC2840	6.2272	196.3	196.3
Cell_01	3	4079.74	4080.58	-5.40872	-34.3923	0.322452	4092.83	0	2.89772	4080.36	-25.2991	CTL	VC2840	5.40872	4079.74	4079.74
Cell_01	3	11638.2	11638.9	-7.61938	-33.4325	0.37541	11644.2	0	1.30834	11638.8	-16.9146	CTL	VC2840	7.61938	7388.75	7388.75
Cell_01	3	18083.3	18087.7	-11.8385	-31.3681	0.99235	18099.2	0	6.79895	18087.1	-71.0374	CTL	VC2840	11.8385	6445.1	6445.1
Cell_01	3	18965.9	18967.3	-50.2531	-32.5407	0.487916	18985.6	0	3.07268	18966.6	-234.173	CTL	VC2840	50.2531	424.1	424.1
Cell_01	4	4994.46	4996.75	-9.51389	-30.1101	1.05282	5004.98	0	3.23981	4995.1	-40.6248	CTL	VC2840	9.51389	1129.88	1129.88
Cell_01	4	17804.6	17807.1	-9.88137	-28.6682	1.24754	17814.4	0	4.28367	17805.5	-41.127	CTL	VC2840	9.88137	661.2	661.2
Cell_01	5	1079.6	1082.93	-10.1435	-27.1667	1.21764	1092.09	0	4.67403	1080.53	-57.9252	CTL	VC2840	10.1435	1079.6	1079.6
Cell_01	5	5727.53	5730.77	-13.2561	-26.6787	1.80139	5746.73	0	5.08914	5729.33	-84.9722	CTL	VC2840	13.2561	748.74	748.74
Cell_01	6	5888.41	5892.93	-10.1864	-25.0858	2.94323	5906.82	0	6.79362	5890.21	-82.2665	CTL	VC2840	10.1864	5888.41	5888.41
Cell_01	6	15867.3	15871.6	-9.23846	-23.8547	1.04332	15886.8	0	7.84575	15870.2	-78.3129	CTL	VC2840	9.23846	9978.89	9978.89
Cell_01	6	16582.3	16585.7	-8.04829	-23.6655	0.520624	16592.6	0	2.21094	16585.2	-22.9603	CTL	VC2840	8.04829	715	715
Cell_01	7	2586.98	2588.75	-7.81959	-23.1004	1.28495	2594.14	0	3.87955	2587.9	-29.0731	CTL	VC2840	7.81959	1973.64	1973.64
Cell_01	7	11127.4	11131	-9.49212	-20.4699	0.996909	11139.7	0	1.8406	11130.6	-27.0039	CTL	VC2840	9.49212	6733.28	6733.28
Cell_01	7	13520.8	13522.4	-6.11093	-22.8498	1.0604	13525.5	0	1.79306	13521.9	-12.9993	CTL	VC2840	6.11093	2393.4	2393.4
Cell_01	8	12052.5	12054	-26.0264	-20.012	0.53711	12068.5	0	4.28205	12053.1	-133.006	CTL	VC2840	26.0264	3045.3	3045.3
Cell_01	8	18958.9	18961.5	-8.31238	-19.9526	1.4006	18971.7	0	5.41145	18960.3	-47.2342	CTL	VC2840	8.31238	304.3	304.3
Cell_01	4	17143.4	17144.9	-14.0614	-28.9378	0.522224	17157.5	0	3.42725	17144.1	-65.9219	CTL	VC2840	14.0614	8064.19	8064.19
Cell_05	1	14618.4	14621.3	-7.24245	-1.39992	0.328104	14625.4	0	1.85691	14620.7	-14.122	CTL	VC2840	7.24245	3391.1	3391.1
Cell_05	2	1848.19	1849.34	-5.78376	-0.295075	0.847329	1861.96	0	3.76117	1848.78	-33.2418	CTL	VC2840	5.78376	1848.19	1848.19
Cell_05	2	3850.28	3851.24	-18.0219	-1.08207	0.452855	3861.82	0	2.45294	3850.9	-63.1708	CTL	VC2840	18.0219	2002.09	2002.09
Cell_05	2	6403.1	6404.8	-27.0414	-0.851365	0.409586	6411.8	0	1.94016	6404.56	-67.9012	CTL	VC2840	27.0414	2552.82	2552.82
Cell_05	3	3777.15	3778.26	-21.1049	-0.476836	0.406194	3783.71	0	1.84914	3777.93	-47.2261	CTL	VC2840	21.1049	3777.15	3777.15
Cell_05	3	12903.7	12910	-7.85235	0.17409	1.05718	12935.4	0	5.07817	12909	-65.6819	CTL	VC2840	7.85235	5507.09	5507.09
Cell_05	3	14071.7	14075.3	-10.7926	-0.626738	1.40332	14081.6	0	3.31836	14073.7	-35.5927	CTL	VC2840	10.7926	1168	1168
Cell_05	3	14719.4	14723.5	-6.82588	-0.375959	1.14285	14733.2	0	3.45545	14722.7	-34.2207	CTL	VC2840	6.82588	647.7	647.7
Cell_05	3	19307.2	19308.6	-12.8536	-0.293313	0.574683	19316.3	0	2.24932	19308.3	-35.2205	CTL	VC2840	12.8536	4587.8	4587.8
Cell_05	3	19979.7	19980.8	-5.61194	-0.52773	0.476049	19984.6	0	1.60814	19980.5	-11.9832	CTL	VC2840	5.61194	672.5	672.5
Cell_05	4	2139.8	2142.66	-6.30279	-0.221838	0.653855	2147.96	0	2.28525	2142.32	-15.2602	CTL	VC2840	6.30279	2139.8	2139.8
Cell_05	4	6263.08	6264.03	-26.0622	-0.371826	0.38939	6269.9	0	1.9288	6263.83	-60.6973	CTL	VC2840	26.0622	4123.28	4123.28
Cell_05	4	7539	7544.31	-14.3222	0.394302	0.543541	7551.6	0	2.69633	7543.81	-44.6793	CTL	VC2840	14.3222	749.14	749.14
Cell_05	4	10872.1	10877.1	-8.44334	-0.303023	0.60989	10881.9	0	2.52623	10876.4	-24.9998	CTL	VC2840	8.44334	1159.2	1159.2
Cell_05	4	13231.1	13231.9	-19.7379	-0.159401	0.397709	13242.7	0	2.07962	13231.6	-56.8319	CTL	VC2840	19.7379	2359	2359
Cell_05	4	15152.2	15153.2	-11.1677	-0.166164	0.361408	15159.7	0	3.18594	15152.7	-38.3504	CTL	VC2840	11.1677	1921.1	1921.1
Cell_05	4	17568.9	17574.8	-11.8197	0.680866	1.22112	17585	0	4.98962	17573.8	-64.277	CTL	VC2840	11.8197	2416.7	2416.7
Cell_05	5	1494.12	1495.43	-14.8783	-0.245806	0.765665	1509.06	0	2.97077	1494.92	-63.1169	CTL	VC2840	14.8783	1494.12	1494.12
Cell_05	5	8178.05	8179.35	-19.9615	-0.478941	0.561559	8188	0	2.41151	8178.92	-60.9041	CTL	VC2840	19.9615	6683.93	6683.93
Cell_05	5	12611.1	12614.4	-11.2052	1.00054	0.840231	12621.5	0	2.35241	12613.9	-30.2472	CTL	VC2840	11.2052	4433.05	4433.05
Cell_05	5	14366.7	14368.2	-8.73974	0.298784	0.916417	14373.1	0	3.21286	14367.5	-25.1686	CTL	VC2840	8.73974	1755.6	1755.6
Cell_05	5	18759.2	18760.5	-16.6708	-0.522796	0.381771	18769.3	0	1.94045	18760.2	-51.4598	CTL	VC2840	16.6708	4392.5	4392.5
Cell_05	6	7962.86	7964.01	-6.51391	0.0565401	0.783278	7971.48	0	1.56691	7963.49	-18.4196	CTL	VC2840	6.51391	2463.42	2463.42
Cell_06	2	798.191	800	-12.7917	-42.2192	0.686503	810.839	0	2.63787	799.229	-51.7614	shARL13b_2	VC2840	12.7917	798.19	798.191
Cell_06	2	6151.15	6157.26	-20.5091	-39.4762	0.773339	6166.1	0	3.054	6156.28	-73.5733	shARL13b_2	VC2840	20.5091	2229.71	2229.71
Cell_06	3	1294.74	1299.08	-8.77454	-36.4341	0.410629	1307.54	0	2.75823	1298.46	-34.3997	shARL13b_2	VC2840	8.77454	1294.74	1294.74
Cell_06	3	18433.8	18434.8	-8.85817	-33.9883	0.54771	18447.4	0	4.65324	18434.3	-49.1694	shARL13b_2	VC2840	8.85817	368.2	368.2
Cell_06	4	4383.03	4384.5	-28.949	-34.692	0.681398	4397.14	0	3.95004	4383.86	-156.373	shARL13b_2	VC2840	28.949	248.15	248.15
Cell_06	4	12897.5	12899.4	-24.9031	-32.7076	0.891402	12914.2	0	4.67809	12898.2	-146.722	shARL13b_2	VC2840	24.9031	3210.5	3210.5
Cell_06	4	18758.3	18760.5	-12.4671	-31.2828	0.890252	18773.1	0	3.92349	18759.4	-73.867	shARL13b_2	VC2840	12.4671	567.8	567.8
Cell_06	5	10868.5	10870.1	-29.6007	-30.8911	0.62412	10884.2	0	3.30581	10869.1	-142.734	shARL13b_2	VC2840	29.6007	1831.6	1831.6
Cell_06	5	15043.5	15044.8	-6.65823	-28.9068	1.08119	15049.9	0	3.05425	15043.9	-23.2029	shARL13b_2	VC2840	6.65823	140.9	140.9
Cell_06	6	1134.52	1135.72	-9.81225	-26.4975	0.614638	1145.03	0	2.77985	1135.17	-32.5661	shARL13b_2	VC2840	9.81225	1134.52	1134.52
Cell_06	6	5900.35	5901.72	-8.90715	-25.7728	1.0282	5917.89	0	3.78307	5901.05	-56.0563	shARL13b_2	VC2840	8.90715	1403.1	1403.1
Cell_06	6	9535.08	9537.61	-11.7814	-25.3769	1.27132	9547.96	0	4.89902	9536.27	-71.6686	shARL13b_2	VC2840	11.7814	30.2	30.2
Cell_06	6	13965.3	13969.5	-15.6412	-24.2022	0.715964	13980.6	0	2.79476	13968.8	-65.8831	shARL13b_2	VC2840	15.6412	627.5	627.5
Cell_06	6	16353.2	16354.5	-11.9724	-24.3068	0.42258	16360.4	0	2.87011	16353.7	-42.0303	shARL13b_2	VC2840	11.9724	265.2	265.2
Cell_06	7	5101.63	5104.92	-13.3854	-22.021	0.672612	5112.11	0	5.52864	5103.55	-65.168	shARL13b_2	VC2840	13.3854	508.86	508.86
Cell_06	7	10411.5	10414.4	-16.4238	-21.0149	1.9527	10429.2	0	6.61125	10413	-113.585	shARL13b_2	VC2840	16.4238	279.5	279.5
Cell_06	7	17023	17026.7	-22.1833	-21.6886	1.42581	17053.8	0	9.09424	17025.4	-251.023	shARL13b_2	VC2840	22.1833	4035.8	4035.8
Cell_06	8	3064.8	3068.23	-9.40549	-20.3917	1.05008	3075.94	0	2.80299	3067.83	-32.8815	shARL13b_2	VC2840	9.40549	992.75	992.75
Cell_06	8	17202.5	17205.7	-9.61338	-19.7811	0.917772	17215.6	0	2.64697	17205	-36.4742	shARL13b_2	VC2840	9.61338	1133.3	1133.3
Cell_06	9	8187.01	8188.55	-9.93139	-20.8487	0.458376	8198.76	0	2.89171	8187.63	-51.0975	shARL13b_2	VC2840	9.93139	5344.54	5344.54
Cell_06	9	13174.1	13175.7	-7.83406	-19.3631	0.690085	13185.1	0	2.50275	13174.8	-26.4255	shARL13b_2	VC2840	7.83406	267.3	267.3
Cell_06	7	3764.64	3767.66	-28.2035	-22.0283	0.729898	3785.2	0	3.49188	3766.9	-148.374	shARL13b_2	VC2840	28.2035	3764.64	3764.64
Cell_06	9	12771	12772.2	-17.8843	-20.5068	0.464332	12784.7	0	5.32631	12771.5	-103.483	shARL13b_2	VC2840	17.8843	1203.1	1203.1
Cell_09	1	13452.8	13454	-16.4913	-28.4543	0.54613	13467.1	0	2.82366	13453.6	-67.8359	shARL13b_2	VC2840	16.4913	6514.49	6514.49
Cell_09	1	17916.2	17919.7	-16.2043	-30.4447	2.30222	17933	0	4.23111	17917.7	-108.981	shARL13b_2	VC2840	16.2043	92.6	92.6
Cell_09	2	14170	14172.9	-14.4469	-27.0569	1.68297	14189.5	0	6.00398	14171.5	-105.424	shARL13b_2	VC2840	14.4469	11509	11509
Cell_09	2	18643.8	18645.7	-7.85184	-22.3602	0.657681	18652.2	0	4.21083	18645.2	-28.262	shARL13b_2	VC2840	7.85184	2284.2	2284.2
Cell_09	3	3366.24	3368.36	-9.8386	-23.9375	0.571585	3386.07	0	2.91923	3367	-61.3371	shARL13b_2	VC2840	9.8386	2374.72	2374.72
Cell_09	3	13584	13586	-11.5565	-20.8468	0.909909	13594.7	0	1.88963	13585.6	-37.1938	shARL13b_2	VC2840	11.5565	2324.1	2324.1
Cell_09	4	5258.63	5263.08	-11.9996	-18.4808	2.11477	5275.09	0	5.06884	5260.45	-70.0109	shARL13b_2	VC2840	11.9996	5258.63	5258.63
Cell_09	4	14896.3	14897.9	-18.7794	-17.8113	0.53478	14903.8	0	2.15786	14897.3	-55.4448	shARL13b_2	VC2840	18.7794	6301.91	6301.91
Cell_09	4	17522	17530.2	-12.4304	-20.1559	1.79636	17534	0	4.18626	17528	-39.4692	shARL13b_2	VC2840	12.4304	65.3	65.3
Cell_09	5	5767.62	5769.36	-6.05489	-17.7547	0.918786	5776.11	0	2.24547	5768.47	-21.8787	shARL13b_2	VC2840	6.05489	1382.37	1382.37
Cell_09	5	7571.01	7576.91	-10.9929	-15.2395	1.30742	7584.6	0	2.85608	7576.47	-29.937	shARL13b_2	VC2840	10.9929	916.57	916.57
Cell_09	5	19961.9	19963.2	-15.8669	-16.2551	0.636662	19967.3	0	1.65111	19962.7	-33.982	shARL13b_2	VC2840	15.8669	8552.5	8552.5
Cell_09	6	12039.6	12045	-13.0132	-17.1686	0.493638	12048.9	0	1.32166	12044.7	-24.8154	shARL13b_2	VC2840	13.0132	5118.36	5118.36
Cell_09	6	16655.8	16660.4	-15.2746	-17.1773	2.6039	16687.8	0	6.29923	16657	-170.623	shARL13b_2	VC2840	15.2746	814.9	814.9
Cell_09	6	18981	18982.5	-26.1569	-13.2591	0.699642	18987.8	0	2.23549	18982	-64.4833	shARL13b_2	VC2840	26.1569	2239.9	2239.9
Cell_09	7	17027.1	17028.3	-8.10191	-11.5207	0.326544	17032.3	0	2.83081	17027.6	-22.588	shARL13b_2	VC2840	8.10191	1244.1	1244.1
Cell_09	8	3530.15	3531.12	-26.8403	-9.93307	0.383424	3545.38	0	3.29035	3530.75	-129.156	shARL13b_2	VC2840	26.8403	3530.15	3530.15
Cell_09	8	12657.7	12660.8	-16.4644	-10.4884	1.3829	12671.5	0	6.67298	12658.7	-124.415	shARL13b_2	VC2840	16.4644	5242.94	5242.94
Cell_09	8	16641.5	16645.4	-11.2113	-10.0533	2.62026	16659.8	0	7.117	16642.5	-101.775	shARL13b_2	VC2840	11.2113	3983.8	3983.8
Cell_09	9	12797.5	12799	-12.1345	-9.44143	0.571028	12811.7	0	2.53536	12798	-56.6908	shARL13b_2	VC2840	12.1345	2191.1	2191.1
Cell_09	9	18277.9	18279.6	-6.2785	-6.94746	0.411929	18285.1	0	2.12187	18278.5	-18.5794	shARL13b_2	VC2840	6.2785	3086.7	3086.7
Cell_09	10	8615.06	8616.25	-6.1202	-6.3979	0.939007	8620.06	0	1.74471	8615.53	-13.4624	shARL13b_2	VC2840	6.1202	5119.9	5119.9
Cell_09	10	9916.68	9920.52	-24.9475	-4.36148	0.891876	9930.25	0	3.42062	9919.97	-103.256	shARL13b_2	VC2840	24.9475	1194.52	1194.52
Cell_03	12	5875.6	5879.93	-7.18077	-14.1809	2.85981	5890.08	0	3.83216	5877.41	-46.4805	CTL	VC2842	7.18077	1605.65	1605.65
Cell_03	12	9822.44	9824.74	-7.44496	-13.4777	1.45036	9835.34	0	3.46457	9823.24	-34.8548	CTL	VC2842	7.44496	1048.78	1048.78
Cell_03	12	13876.9	13878.3	-7.41671	-14.0248	0.390504	13889.1	0	4.65002	13877.3	-51.5795	CTL	VC2842	7.41671	2259.2	2259.2
Cell_03	12	15451.1	15455.3	-17.2004	-12.8532	0.746558	15469.3	0	4.57681	15454	-111.492	CTL	VC2842	17.2004	1574.2	1574.2
Cell_03	12	15995.2	16000.8	-9.5613	-13.003	2.59993	16019	0	5.85271	15998.3	-78.111	CTL	VC2842	9.5613	544.1	544.1
Cell_03	13	2736.13	2737.72	-9.23252	-12.7217	0.47591	2757.84	0	2.4077	2737.06	-65.2363	CTL	VC2842	9.23252	2736.13	2736.13
Cell_03	13	15018.8	15020.6	-8.77259	-13.2671	0.4877	15031.7	0	4.91126	15019.4	-55.3103	CTL	VC2842	8.77259	1458	1458
Cell_03	14	6494.18	6497.58	-6.33418	-12.3788	2.23235	6508.54	0	3.25968	6495.64	-42.0825	CTL	VC2842	6.33418	325.62	325.62
Cell_03	14	9095.17	9097.13	-8.19496	-11.5498	0.507671	9116.33	0	5.48345	9096.14	-59.8552	CTL	VC2842	8.19496	2600.99	2600.99
Cell_03	14	17993.9	17999.1	-10.4309	-11.3707	1.36195	18008.5	0	4.17618	17997.5	-57.6514	CTL	VC2842	10.4309	1591.7	1591.7
Cell_03	14	19660.1	19662.1	-11.9041	-12.8394	1.32504	19682	0	5.5853	19660.8	-94.2938	CTL	VC2842	11.9041	1666.2	1666.2
Cell_03	15	17742.3	17749.2	-8.33207	-9.34332	1.23533	17756.6	0	5.22689	17746.4	-45.7903	CTL	VC2842	8.33207	3637.3	3637.3
Cell_03	16	12548	12553.9	-15.6831	-8.45602	0.879446	12570	0	5.44715	12553.3	-83.3408	CTL	VC2842	15.6831	6583.62	6583.62
Cell_03	16	12840.3	12843	-6.29123	-9.95621	1.29471	12852	0	2.75962	12841.8	-30.917	CTL	VC2842	6.29123	292.3	292.3
Cell_03	17	2852.42	2853.09	-7.77501	-12.4151	0.366347	2861.04	0	2.60811	2853.04	-35.0212	CTL	VC2842	7.77501	381.64	381.64
Cell_03	17	6196.47	6198.85	-9.1096	-11.8924	1.35361	6217.94	0	5.50687	6197.42	-87.7776	CTL	VC2842	9.1096	3344.05	3344.05
Cell_03	17	8889.59	8892.58	-8.65646	-11.2041	1.18406	8904.1	0	5.1983	8891.86	-50.9729	CTL	VC2842	8.65646	2693.12	2693.12
Cell_03	17	16285.4	16287.9	-13.0324	-9.72764	1.35606	16305.8	0	6.82163	16286.5	-107.2	CTL	VC2842	13.0324	307.8	307.8
Cell_03	18	634.092	637.641	-18.0103	-12.1286	1.49201	649.393	0	6.39903	635.534	-128.595	CTL	VC2842	18.0103	634.09	634.092
Cell_03	18	15426	15429.5	-10.296	-10.8095	1.94102	15447.6	0	3.54513	15427.6	-74.291	CTL	VC2842	10.296	10413.3	10413.3
Cell_03	18	15725.8	15730.9	-8.35632	-10.7901	1.1881	15740.2	0	6.05721	15729.3	-66.6242	CTL	VC2842	8.35632	299.8	299.8
Cell_03	18	19542.1	19542.9	-7.13244	-10.2747	0.502355	19555.5	0	2.72385	19542.6	-41.4969	CTL	VC2842	7.13244	3434	3434
Cell_03	15	11667.8	11668.9	-12.3707	-10.5965	0.497851	11678.8	0	3.76437	11668.5	-58.8138	CTL	VC2842	12.3707	8557.31	8557.31
Cell_06	1	4678.06	4679.23	-9.43813	-48.5512	0.696133	4691.21	0	2.34045	4678.75	-38.3584	CTL	VC2842	9.43813	206.14	206.14
Cell_06	1	17351.6	17352.9	-6.85773	-44.6803	0.680204	17357.9	0	1.97325	17352.3	-17.2607	CTL	VC2842	6.85773	125.6	125.6
Cell_06	2	13129	13132.7	-13.6514	-37.0074	0.730254	13142.6	0	1.91349	13132.4	-52.012	CTL	VC2842	13.6514	84.8	84.8
Cell_06	3	12206.6	12208.5	-20.6535	-34.7601	0.544155	12219	0	3.67734	12207.7	-85.4295	CTL	VC2842	20.6535	929.7	929.7
Cell_06	4	2912.32	2916.47	-14.3112	-33.955	2.99438	2926.74	0	5.39667	2914.27	-70.9606	CTL	VC2842	14.3112	44.72	44.72
Cell_06	4	9747.41	9749.96	-8.92236	-33.1184	1.71393	9754.29	0	3.40574	9748.01	-34.3207	CTL	VC2842	8.92236	314.53	314.53
Cell_06	4	12456.7	12457.3	-6.92314	-32.89	0.278078	12464.8	0	2.70879	12457.3	-25.5957	CTL	VC2842	6.92314	124.8	124.8
Cell_06	5	865.673	871.782	-16.4596	-32.344	0.597039	878.069	0	3.82874	870.638	-71.3491	CTL	VC2842	16.4596	318.75	318.75
Cell_06	5	10821.1	10822.7	-7.8537	-31.2267	0.805991	10830.5	0	3.12745	10821.7	-28.911	CTL	VC2842	7.8537	705.6	705.6
Cell_06	5	15323.8	15326.6	-8.73472	-31.1822	0.479486	15332.2	0	3.63696	15325.9	-29.7149	CTL	VC2842	8.73472	1022.9	1022.9
Cell_06	6	5114.57	5116.12	-9.71333	-29.2328	0.693568	5123.45	0	3.21301	5115.26	-32.9725	CTL	VC2842	9.71333	344.36	344.36
Cell_06	6	14606.9	14608.3	-15.8708	-30.6494	0.713472	14619	0	2.64549	14607.9	-67.553	CTL	VC2842	15.8708	202	202
Cell_06	7	5403.32	5404.25	-7.09447	-29.789	0.406338	5410.05	0	3.36447	5403.87	-28.6974	CTL	VC2842	7.09447	2091.08	2091.08
Cell_06	7	16060.1	16061.2	-8.90222	-28.0055	0.429878	16065	0	1.96055	16060.9	-20.0062	CTL	VC2842	8.90222	79	79
Cell_06	8	9045.64	9046.54	-11.2482	-26.5447	0.500162	9051.56	0	3.03357	9046.22	-31.3322	CTL	VC2842	11.2482	174.91	174.91
Cell_06	8	15554.1	15557.5	-12.9135	-27.6072	0.78339	15565.1	0	4.43441	15556.3	-48.0237	CTL	VC2842	12.9135	131.5	131.5
Cell_06	9	1300.24	1301.27	-8.70256	-27.8208	0.513266	1308.09	0	3.31622	1300.87	-31.7666	CTL	VC2842	8.70256	340.85	340.848
Cell_06	9	9231.28	9234.29	-9.07009	-26.6539	1.22893	9245.55	0	5.8885	9232.13	-53.6523	CTL	VC2842	9.07009	99.44	99.44
Cell_06	9	12937.2	12938.8	-17.12	-27.4235	0.528814	12949.7	0	4.30417	12938.2	-77.4909	CTL	VC2842	17.12	313.6	313.6
Cell_06	9	18811.1	18812.7	-11.3427	-26.4258	0.704224	18823.3	0	4.04046	18811.9	-51.9581	CTL	VC2842	11.3427	1803.4	1803.4
Cell_06	10	11681.8	11682.7	-11.9967	-27.2488	0.427477	11703.9	0	4.43217	11682.4	-75.152	CTL	VC2842	11.9967	1385.5	1385.5
Cell_06	10	19071.9	19074.6	-9.66857	-25.487	1.76113	19083.8	0	3.93684	19072.6	-53.8268	CTL	VC2842	9.66857	1295.3	1295.3
Cell_06	5	6768.23	6772.31	-12.2779	-30.3853	0.6818	6779.46	0	3.54018	6771.13	-45.6681	CTL	VC2842	12.2779	839.67	839.67
Cell_10	2	3974.42	3976.81	-8.73169	-54.6898	0.931516	3984.39	0	2.87951	3975.71	-31.7496	CTL	VC2842	8.73169	3176.71	3176.71
Cell_10	2	12026.8	12029	-10.3379	-52.4666	1.12175	12035.5	0	2.55233	12027.8	-33.8496	CTL	VC2842	10.3379	1510.8	1510.8
Cell_10	3	1324.87	1327.07	-8.76388	-47.1317	1.07561	1335.64	0	2.3045	1326.67	-24.4848	CTL	VC2842	8.76388	1324.87	1324.87
Cell_10	3	1373.38	1376.06	-21.5318	-47.5171	0.566865	1384.55	0	2.93235	1375.24	-70.0775	CTL	VC2842	21.5318	48.51	48.51
Cell_10	3	16324.7	16327.9	-11.52	-45.2302	0.62851	16335.2	0	3.10125	16326.7	-42.2481	CTL	VC2842	11.52	4587.2	4587.2
Cell_10	4	3562.24	3564.71	-11.6462	-43.0042	0.816343	3571.48	0	4.56381	3563.67	-50.4969	CTL	VC2842	11.6462	3562.24	3562.24
Cell_10	4	11895.3	11897.4	-8.6656	-42.4145	1.55563	11904.6	0	2.3556	11896.2	-27.4297	CTL	VC2842	8.6656	1178.7	1178.7
Cell_10	4	15741.6	15744.1	-12.405	-42.1545	0.749177	15752	0	3.98657	15742.4	-62.2666	CTL	VC2842	12.405	2817.5	2817.5
Cell_10	5	9392.08	9395.45	-11.5278	-39.583	1.08342	9404.7	0	4.76723	9394.51	-57.3789	CTL	VC2842	11.5278	3862.81	3862.81
Cell_10	6	773.707	776.006	-15.307	-38.2635	0.862275	786.772	0	3.42825	774.571	-65.6042	CTL	VC2842	15.307	773.71	773.707
Cell_10	6	8507.1	8508.67	-8.37207	-38.5211	0.961066	8516.64	0	2.9432	8508.04	-29.5561	CTL	VC2842	8.37207	2340.51	2340.51
Cell_10	6	16853.6	16854.6	-7.74695	-37.3702	0.36657	16860.3	0	1.73721	16854.3	-20.021	CTL	VC2842	7.74695	1268.9	1268.9
Cell_10	7	6318.69	6320.02	-6.51737	-36.5244	0.702115	6326.76	0	3.4934	6319.25	-24.1982	CTL	VC2842	6.51737	2332.76	2332.76
Cell_10	9	2851.32	2853.49	-7.97082	-38.11	1.58648	2860.26	0	2.75124	2852.15	-28.504	CTL	VC2842	7.97082	2851.32	2851.32
Cell_10	9	10145.2	10147.1	-6.34114	-37.1463	1.14839	10153	0	4.21263	10145.9	-26.1441	CTL	VC2842	6.34114	3528.33	3528.33
Cell_10	9	14578.3	14579.2	-8.53416	-37.3397	0.536842	14589	0	2.5035	14578.9	-34.1073	CTL	VC2842	8.53416	1673.1	1673.1
Cell_10	9	17128.2	17130.1	-8.79281	-37.0686	0.844164	17142.1	0	4.24402	17129	-41.523	CTL	VC2842	8.79281	580.8	580.8
Cell_10	8	1159.93	1161.11	-10.949	-38.7885	0.387542	1174.67	0	3.64689	1160.37	-52.6956	CTL	VC2842	10.949	1159.93	1159.93
Cell_10	8	3028.22	3030.04	-8.62814	-38.6919	1.57844	3037.76	0	3.08832	3028.84	-36.351	CTL	VC2842	8.62814	431.74	431.74
Cell_10	8	15602.2	15603.7	-14.904	-38.6477	0.368881	15614.7	0	3.25819	15602.7	-62.1239	CTL	VC2842	14.904	1950.6	1950.6
Cell_10	10	1023.2	1026.34	-9.91695	-36.2436	1.07831	1030.33	0	3.18228	1025.41	-26.9777	CTL	VC2842	9.91695	1023.2	1023.2
Cell_10	10	13668.9	13671.2	-9.94679	-35.8356	0.533251	13682.1	0	6.52051	13669.8	-55.461	CTL	VC2842	9.94679	6792.75	6792.75
Cell_10	10	17486	17487.6	-10.2688	-35.7816	0.50415	17493.7	0	3.18666	17486.6	-34.1408	CTL	VC2842	10.2688	1138.1	1138.1
Cell_11	1	13006.9	13008.9	-13.9028	-39.2099	0.429719	13017.3	0	3.29632	13008.4	-53.692	CTL	VC2842	13.9028	11157.5	11157.5
Cell_11	1	16607.7	16612.8	-8.08218	-38.4206	2.14638	16622.4	0	4.12843	16610.8	-41.6954	CTL	VC2842	8.08218	3600.8	3600.8
Cell_11	2	4210.25	4212.95	-11.7941	-33.2985	0.594901	4222.86	0	3.2919	4212.34	-44.6482	CTL	VC2842	11.7941	4210.25	4210.25
Cell_11	2	4504.53	4506.27	-14.9112	-34.0939	0.500485	4522.96	0	4.00149	4505.94	-79.5983	CTL	VC2842	14.9112	294.28	294.28
Cell_11	2	5737.5	5738.96	-14.8835	-33.7064	0.591861	5746.67	0	2.43779	5738.56	-45.6838	CTL	VC2842	14.8835	1232.97	1232.97
Cell_11	2	11050.1	11051.8	-27.1727	-33.087	0.611147	11076.8	0	3.60878	11051.3	-142.505	CTL	VC2842	27.1727	5312.6	5312.6
Cell_11	3	527.47	528.668	-17.7405	-27.2539	0.50025	535.445	0	2.49622	528.275	-52.6991	CTL	VC2842	17.7405	527.47	527.47
Cell_11	3	8262.73	8265.33	-8.45188	-25.0316	0.402639	8271.21	0	4.53901	8263.63	-34.1689	CTL	VC2842	8.45188	7735.26	7735.26
Cell_11	3	13842.5	13844.5	-18.2528	-22.9154	0.52972	13854.2	0	2.49569	13843.8	-68.3803	CTL	VC2842	18.2528	5579.77	5579.77
Cell_11	3	14164.2	14165.7	-14.0622	-23.34	0.565902	14182.6	0	4.3243	14164.9	-88.5229	CTL	VC2842	14.0622	321.7	321.7
Cell_11	3	16363.5	16364.9	-7.56232	-22.949	1.02976	16371	0	2.09154	16364.2	-23.2574	CTL	VC2842	7.56232	2199.3	2199.3
Cell_11	4	3187.27	3188.4	-7.64755	-20.2638	0.711134	3197.05	0	3.32453	3187.92	-31.7364	CTL	VC2842	7.64755	3187.27	3187.27
Cell_11	4	8644.97	8646.24	-15.3067	-19.5074	0.764857	8658	0	3.525	8645.78	-71.855	CTL	VC2842	15.3067	5457.7	5457.7
Cell_11	4	12000.5	12001.6	-12.6157	-18.4144	0.481688	12016.8	0	3.6983	12001.1	-75.118	CTL	VC2842	12.6157	3355.53	3355.53
Cell_11	4	17231.7	17233.3	-13.6117	-17.4734	0.414611	17240.7	0	3.23291	17233	-52.0833	CTL	VC2842	13.6117	5231.2	5231.2
Cell_11	4	19747.1	19748.5	-6.39605	-16.7725	0.889367	19752.2	0	1.95314	19747.9	-16.0138	CTL	VC2842	6.39605	2515.4	2515.4
Cell_11	5	2325.67	2326.82	-9.19048	-15.4369	0.366123	2332.24	0	2.20181	2326.2	-27.2798	CTL	VC2842	9.19048	2325.67	2325.67
Cell_11	5	5215.72	5217.5	-8.68956	-15.4129	1.00158	5230.37	0	2.59716	5216.52	-50.2579	CTL	VC2842	8.68956	2890.05	2890.05
Cell_11	5	8528.31	8530.87	-7.41598	-14.4283	1.31842	8543.3	0	2.28975	8529.79	-32.0779	CTL	VC2842	7.41598	3312.59	3312.59
Cell_11	5	9804.58	9805.95	-20.0884	-13.212	0.540042	9816.99	0	2.2175	9805.23	-76.0881	CTL	VC2842	20.0884	1276.27	1276.27
Cell_11	6	3568.07	3570.91	-11.2916	-11.907	0.702532	3580.53	0	2.33281	3569.51	-40.0965	CTL	VC2842	11.2916	3568.07	3568.07
Cell_11	6	15329	15333.6	-9.00291	-12.9452	0.978725	15342.6	0	3.89129	15332.5	-43.38	CTL	VC2842	9.00291	11760.9	11760.9
Cell_11	1	1849.41	1851.34	-9.25203	-43.4758	0.679697	1855.46	0	3.06156	1850.29	-24.3309	CTL	VC2842	9.25203	1849.41	1849.41
Cell_01	1	5107.15	5110.32	-11.4083	-52.4952	0.916421	5119.74	0	4.80222	5109.23	-54.2222	shARL13b_1	VC2842	11.4083	3420.59	3420.59
Cell_01	1	15136.6	15139.6	-9.00711	-52.2292	1.29736	15146.7	0	2.64571	15138.9	-33.5207	shARL13b_1	VC2842	9.00711	6760.13	6760.13
Cell_01	1	19319.1	19324.6	-8.58925	-48.643	1.33685	19338.3	0	3.87994	19323.6	-51.1424	shARL13b_1	VC2842	8.58925	3528.4	3528.4
Cell_01	2	9444.25	9447.04	-7.08128	-43.5352	0.611834	9450.68	0	2.88787	9446.5	-16.9686	shARL13b_1	VC2842	7.08128	2146	2146
Cell_01	2	13463.9	13466.8	-7.42762	-42.0166	1.48005	13473.2	0	4.04786	13465.7	-26.0126	shARL13b_1	VC2842	7.42762	2625.3	2625.3
Cell_01	3	6745.99	6747.71	-6.03807	-37.8217	1.10117	6753.91	0	5.33613	6746.7	-29.0382	shARL13b_1	VC2842	6.03807	470.2	470.2
Cell_01	3	13007.6	13009.3	-6.27197	-35.5918	0.900722	13015.3	0	2.77533	13008.7	-18.0346	shARL13b_1	VC2842	6.27197	1465.6	1465.6
Cell_01	4	4701.49	4707.82	-12.3541	-31.7925	0.76872	4713.6	0	4.52997	4705.63	-57.6781	shARL13b_1	VC2842	12.3541	623.9	623.9
Cell_01	4	8731.75	8733.42	-17.9431	-32.4658	0.445422	8750.03	0	3.77637	8732.56	-92.3908	shARL13b_1	VC2842	17.9431	2057.56	2057.56
Cell_01	5	7778.87	7784.25	-10.788	-28.781	1.5886	7794.23	0	4.66946	7782.4	-57.3345	shARL13b_1	VC2842	10.788	7778.87	7778.87
Cell_01	5	13849.2	13851.3	-6.52991	-28.669	0.678675	13859.9	0	2.50911	13850.6	-25.6525	shARL13b_1	VC2842	6.52991	4417.61	4417.61
Cell_01	6	1534.46	1536.42	-13.4149	-28.1011	0.741328	1543.01	0	3.81197	1535.64	-52.6636	shARL13b_1	VC2842	13.4149	1534.46	1534.46
Cell_01	7	6674.02	6676.93	-8.43785	-23.2205	1.51535	6690.23	0	4.31687	6675.17	-46.2225	shARL13b_1	VC2842	8.43785	6674.02	6674.02
Cell_01	7	13500.9	13502.8	-13.1358	-22.9602	0.979905	13511.2	0	3.08519	13501.9	-52.6505	shARL13b_1	VC2842	13.1358	1586.1	1586.1
Cell_01	7	14843.6	14846.3	-11.5994	-21.9209	0.515001	14855.6	0	4.24044	14845.9	-53.4418	shARL13b_1	VC2842	11.5994	127.1	127.1
Cell_01	7	15025.4	15027.4	-9.18248	-21.8904	1.17388	15036.8	0	5.3635	15026.3	-45.1039	shARL13b_1	VC2842	9.18248	181.8	181.8
Cell_01	8	1784.85	1788.95	-8.79501	-24.4014	2.57988	1796.28	0	6.44997	1785.63	-52.1688	shARL13b_1	VC2842	8.79501	1784.85	1784.85
Cell_01	8	11481.9	11483.7	-6.7102	-22.7876	1.14153	11491.9	0	3.24633	11483.3	-28.2901	shARL13b_1	VC2842	6.7102	7024.35	7024.35
Cell_01	8	19375.7	19378.6	-9.49592	-21.0884	1.02182	19383.6	0	3.25453	19377.5	-29.9332	shARL13b_1	VC2842	9.49592	3666	3666
Cell_01	9	3146.87	3149.21	-7.01433	-18.9011	1.59935	3154.81	0	4.74084	3147.69	-30.104	shARL13b_1	VC2842	7.01433	747.59	747.59
Cell_01	9	8699.06	8701.22	-7.1333	-19.3923	1.36645	8706.4	0	3.63704	8700.04	-26.8767	shARL13b_1	VC2842	7.1333	725.38	725.38
Cell_01	10	8104.25	8107.57	-5.67757	-16.8871	2.72991	8115.32	0	3.83298	8104.99	-27.4301	shARL13b_1	VC2842	5.67757	8104.25	8104.25
Cell_01	10	12815.4	12817.4	-8.54967	-16.5114	1.5767	12822.9	0	1.98675	12816.7	-24.377	shARL13b_1	VC2842	8.54967	1747.4	1747.4
Cell_02	1	696.762	700.025	-9.10361	-63.3875	0.345533	704.318	0	2.307	698.993	-23.8152	shARL13b_1	VC2842	9.10361	97.24	97.244
Cell_02	1	2655.74	2659.14	-8.09749	-62.3796	1.9621	2669.97	0	4.71423	2656.58	-55.2592	shARL13b_1	VC2842	8.09749	1501.58	1501.58
Cell_02	1	6661.84	6664.53	-8.47195	-61.5536	1.03747	6676.4	0	2.27936	6663.36	-41.3748	shARL13b_1	VC2842	8.47195	3063.49	3063.49
Cell_02	1	6871.36	6872.48	-12.5834	-61.3727	0.437895	6878.61	0	2.66982	6871.85	-37.6863	shARL13b_1	VC2842	12.5834	209.52	209.52
Cell_02	1	15101.6	15104.2	-6.46096	-58.1082	1.00047	15116.8	0	2.51417	15102.8	-30.4542	shARL13b_1	VC2842	6.46096	5581.2	5581.2
Cell_02	1	16359.7	16361.1	-8.28634	-56.7161	0.676371	16367.4	0	2.77992	16360.5	-21.084	shARL13b_1	VC2842	8.28634	41.9	41.9
Cell_02	2	1923.86	1926.32	-7.76028	-54.3365	1.23326	1930.32	0	2.20322	1925.28	-19.9411	shARL13b_1	VC2842	7.76028	593.28	593.28
Cell_02	2	3460.32	3460.93	-6.31699	-53.7599	0.331607	3466.9	0	2.16347	3460.91	-19.4505	shARL13b_1	VC2842	6.31699	402.2	402.2
Cell_02	2	5281.9	5284.28	-7.34971	-53.4412	2.09603	5288.48	0	2.17698	5282.89	-22.0081	shARL13b_1	VC2842	7.34971	940.48	940.48
Cell_02	2	8004.89	8006	-6.86887	-52.2497	0.681235	8013.99	0	2.64011	8005.6	-22.0418	shARL13b_1	VC2842	6.86887	2722.99	2722.99
Cell_02	2	9238.75	9240.49	-8.16006	-52.5085	0.752563	9246.13	0	2.46063	9240	-21.9471	shARL13b_1	VC2842	8.16006	1233.86	1233.86
Cell_02	2	13072.8	13074.1	-18.2485	-51.8992	0.514411	13082	0	2.71613	13073.9	-56.4942	shARL13b_1	VC2842	18.2485	2559.8	2559.8
Cell_02	2	13331.4	13333.7	-8.98201	-52.0104	1.29236	13343.6	0	3.04166	13332.6	-31.9475	shARL13b_1	VC2842	8.98201	258.6	258.6
Cell_02	2	14119.8	14123.1	-14.1321	-51.4131	0.55654	14129.8	0	3.65272	14122	-53.5217	shARL13b_1	VC2842	14.1321	673.5	673.5
Cell_02	2	14198.3	14204.2	-16.0709	-51.0067	0.618644	14216.8	0	2.69795	14203.8	-58.9211	shARL13b_1	VC2842	16.0709	78.5	78.5
Cell_02	2	16326.3	16328.3	-12.7934	-50.4328	0.620242	16338	0	3.11541	16327.4	-51.2361	shARL13b_1	VC2842	12.7934	1720.1	1720.1
Cell_02	2	18714.3	18715.7	-12.1329	-50.5681	0.465584	18722.9	0	2.82637	18715	-37.4522	shARL13b_1	VC2842	12.1329	1381.1	1381.1
Cell_02	3	3896.92	3898.43	-6.79717	-47.6094	1.09351	3902.96	0	2.61547	3897.7	-19.5885	shARL13b_1	VC2842	6.79717	2718.3	2718.3
Cell_02	3	8476.54	8479.48	-14.0817	-46.3247	0.583908	8485.73	0	3.97216	8478.46	-55.2835	shARL13b_1	VC2842	14.0817	2929.79	2929.79
Cell_02	3	9538.96	9540.41	-7.55007	-46.6367	1.11638	9546.4	0	2.58425	9539.47	-24.8563	shARL13b_1	VC2842	7.55007	464.38	464.38
Cell_02	3	14051.6	14053.7	-10.1923	-46.1122	0.535818	14061.7	0	2.60912	14053.1	-36.5525	shARL13b_1	VC2842	10.1923	2011.8	2011.8
Cell_02	3	15275.8	15278.8	-15.4805	-44.9805	0.879278	15287.6	0	2.85073	15278.1	-57.3214	shARL13b_1	VC2842	15.4805	503.8	503.8
Cell_02	3	19754.3	19755.7	-10.3944	-44.7996	0.556103	19760.3	0	2.39453	19755	-32.1649	shARL13b_1	VC2842	10.3944	728.1	728.1
Cell_07	1	1529.25	1530.82	-6.52308	-27.1987	1.05117	1538	0	4.06882	1530.05	-30.1686	shARL13b_1	VC2842	6.52308	270.72	270.72
Cell_07	1	3989.7	3992.4	-9.39865	-26.972	1.52138	4000.73	0	3.69215	3991.38	-30.7101	shARL13b_1	VC2842	9.39865	2460.45	2460.45
Cell_07	1	7413.24	7414.75	-6.69239	-27.5055	1.06141	7418.24	0	2.44254	7414.31	-17.6677	shARL13b_1	VC2842	6.69239	217.94	217.94
Cell_07	1	11631.9	11635.3	-15.0155	-26.3662	0.708419	11651.5	0	3.75973	11634.7	-75.9031	shARL13b_1	VC2842	15.0155	1218.9	1218.9
Cell_07	1	16215.4	16217.5	-23.3584	-26.5985	0.543089	16231.5	0	4.1033	16216.6	-119.361	shARL13b_1	VC2842	23.3584	4583.5	4583.5
Cell_07	2	3417.16	3420.34	-13.6577	-26.0698	0.836286	3430.13	0	4.9627	3418.64	-72.9142	shARL13b_1	VC2842	13.6577	3417.16	3417.16
Cell_07	2	5986.19	5988.1	-8.20904	-26.0192	0.680405	5997.3	0	4.5081	5987.64	-41.676	shARL13b_1	VC2842	8.20904	1229.62	1229.62
Cell_07	2	6982.96	6985.05	-8.90201	-26.6813	1.02676	6996.43	0	4.709	6983.63	-53.6246	shARL13b_1	VC2842	8.90201	851.56	851.56
Cell_07	2	7133.23	7135.02	-20.7712	-26.598	0.936051	7145.98	0	4.25713	7134.06	-96.9018	shARL13b_1	VC2842	20.7712	150.27	150.27
Cell_07	2	8251.82	8254.54	-11.4632	-25.8414	1.08049	8265.24	0	3.04868	8253.73	-53.2868	shARL13b_1	VC2842	11.4632	173.63	173.63
Cell_07	2	9928.37	9929.72	-11.098	-26.6828	0.665759	9941.6	0	3.81576	9929.11	-54.6467	shARL13b_1	VC2842	11.098	1676.55	1676.55
Cell_07	2	12838.6	12839.4	-5.50718	-26.9511	0.442205	12850.3	0	2.84579	12839	-28.1997	shARL13b_1	VC2842	5.50718	1277.2	1277.2
Cell_07	2	14211.7	14214	-11.3858	-29.4771	0.533275	14223.5	0	3.87832	14212.3	-57.084	shARL13b_1	VC2842	11.3858	1373.1	1373.1
Cell_07	2	17203.3	17204.7	-12.0712	-27.4123	0.658876	17219.2	0	3.32475	17204.1	-59.9515	shARL13b_1	VC2842	12.0712	2991.6	2991.6
Cell_07	3	1165.85	1167.91	-10.2709	-27.4361	1.01338	1184.09	0	3.62901	1166.63	-56.1698	shARL13b_1	VC2842	10.2709	1165.85	1165.85
Cell_07	3	4992.91	4993.95	-6.38163	-26.8214	0.460481	5006.53	0	6.13464	4993.61	-39.2438	shARL13b_1	VC2842	6.38163	3827.06	3827.06
Cell_07	3	5471.61	5476.43	-8.31221	-26.8865	2.42916	5482.78	0	4.41828	5474.3	-35.833	shARL13b_1	VC2842	8.31221	478.7	478.7
Cell_07	3	8462.79	8465.88	-16.9318	-27.0622	0.955326	8471.82	0	3.50461	8464.62	-52.6415	shARL13b_1	VC2842	16.9318	52.47	52.47
Cell_07	3	9036.96	9038.34	-8.944	-26.8164	0.939213	9045.53	0	3.38118	9037.51	-36.9249	shARL13b_1	VC2842	8.944	574.17	574.17
Cell_07	3	10007.9	10011.3	-22.097	-26.6512	0.64271	10017.8	0	3.20264	10010.3	-79.658	shARL13b_1	VC2842	22.097	722.31	722.31
Cell_07	3	10283.6	10284.8	-11.5249	-29.2344	0.537953	10294.4	0	2.99846	10284.2	-49.2069	shARL13b_1	VC2842	11.5249	130.1	130.1
Cell_07	3	15907.2	15909	-26.479	-27.2745	0.59543	15923.5	0	3.96186	15908.4	-126.491	shARL13b_1	VC2842	26.479	633	633
Cell_07	5	6745.74	6748.31	-8.9292	-24.994	2.02086	6754.24	0	2.82378	6747	-31.4113	shARL13b_1	VC2842	8.9292	6745.74	6745.74
Cell_08	1	5488.22	5489.03	-7.5425	-72.279	0.379145	5492.3	0	1.15565	5488.8	-13.3945	shARL13b_1	VC2842	7.5425	2031.66	2031.66
Cell_08	1	19912.2	19915	-10.9379	-68.0719	0.621534	19925.4	0	3.30192	19913.8	-41.0249	shARL13b_1	VC2842	10.9379	72.2	72.2
Cell_08	2	3833.7	3836.84	-9.90277	-66.8548	0.35412	3842.44	0	2.54357	3836.66	-23.6494	shARL13b_1	VC2842	9.90277	316.46	316.46
Cell_08	2	8182.41	8185.75	-6.93519	-66.3313	2.07355	8193.55	0	5.36368	8184.12	-36.8965	shARL13b_1	VC2842	6.93519	322.66	322.66
Cell_08	3	3407.98	3408.55	-7.20572	-60.7323	0.336931	3412.64	0	2.12051	3408.52	-17.914	shARL13b_1	VC2842	7.20572	286.34	286.34
Cell_08	3	16810.6	16811.6	-7.02081	-57.255	0.608856	16816.3	0	2.23719	16811.2	-18.3154	shARL13b_1	VC2842	7.02081	525.6	525.6
Cell_08	5	6076.78	6078.08	-10.6995	-48.9376	0.85159	6095.57	0	3.04835	6077.49	-54.3625	shARL13b_1	VC2842	10.6995	861.03	861.03
Cell_08	5	13913.4	13914.7	-7.6893	-49.0487	0.350895	13918.7	0	3.50378	13914.4	-19.7561	shARL13b_1	VC2842	7.6893	30.6	30.6
Cell_08	6	6011.99	6015.3	-8.2667	-45.3466	0.377287	6024.76	0	3.08927	6015.05	-27.701	shARL13b_1	VC2842	8.2667	1207.92	1207.92
Cell_08	6	10677.5	10682.1	-9.81739	-44.7966	0.620056	10691	0	3.61698	10681.7	-38.795	shARL13b_1	VC2842	9.81739	83.5	83.5
Cell_08	6	15792.3	15796.8	-18.7256	-44.1893	0.587463	15804.8	0	2.31332	15796.3	-57.6484	shARL13b_1	VC2842	18.7256	78.2	78.2
Cell_08	6	19640.1	19641.3	-28.8999	-45.7275	0.457766	19653.8	0	3.40392	19640.6	-121.258	shARL13b_1	VC2842	28.8999	1259.2	1259.2
Cell_08	7	8355.13	8356.51	-12.7926	-42.267	0.380179	8365.8	0	2.70828	8356.24	-41.8009	shARL13b_1	VC2842	12.7926	1376.93	1376.93
Cell_08	7	14967.2	14970.3	-6.79158	-42.8481	1.86317	14975.5	0	4.09653	14968.2	-29.0189	shARL13b_1	VC2842	6.79158	401	401
Cell_08	8	2387.4	2390.2	-21.0222	-42.259	0.607247	2402.99	0	3.58422	2389.13	-97.0638	shARL13b_1	VC2842	21.0222	2387.4	2387.4
Cell_08	8	5893.93	5895.73	-6.92236	-40.9292	1.22657	5902.68	0	4.08889	5894.46	-26.1888	shARL13b_1	VC2842	6.92236	950.77	950.77
Cell_08	9	878.301	881.779	-13.3487	-39.6294	0.68127	892.999	0	4.60476	880.463	-71.4782	shARL13b_1	VC2842	13.3487	878.3	878.301
Cell_08	9	2680.65	2681.73	-19.0204	-42.0388	0.620914	2694.73	0	3.1586	2681.28	-90.51	shARL13b_1	VC2842	19.0204	193.66	193.66
Cell_08	9	4337.25	4337.92	-10.9966	-39.8209	0.352466	4343.09	0	2.56087	4337.9	-32.7775	shARL13b_1	VC2842	10.9966	324.52	324.52
Cell_08	9	15855.5	15856.4	-11.7468	-38.1799	0.398225	15867.1	0	2.37993	15856.1	-37.2833	shARL13b_1	VC2842	11.7468	573.7	573.7
Cell_08	10	1892.97	1896.53	-8.93629	-38.1519	0.779839	1903.87	0	2.3876	1895.59	-33.9772	shARL13b_1	VC2842	8.93629	935.92	935.915
Cell_08	10	13931	13932.3	-16.8573	-37.6957	0.45026	13944.3	0	3.60922	13931.6	-74.0413	shARL13b_1	VC2842	16.8573	1601.3	1601.3
Cell_08	10	16131.2	16132.4	-11.7079	-38.4203	0.848062	16139.2	0	1.81055	16131.8	-32.7934	shARL13b_1	VC2842	11.7079	142.3	142.3
Cell_09	4	2229.58	2231.24	-10.5053	-5.48565	1.05142	2238.22	0	2.77762	2230.6	-34.4889	shARL13b_1	VC2842	10.5053	2229.58	2229.58
Cell_09	4	2463.44	2465.18	-8.60406	-5.2873	1.24208	2471.44	0	2.84661	2464.49	-30.8238	shARL13b_1	VC2842	8.60406	233.86	233.86
Cell_09	4	4171.29	4173.56	-19.1389	-4.89013	0.570676	4179.25	0	3.9304	4171.95	-78.4031	shARL13b_1	VC2842	19.1389	1608.32	1608.32
Cell_09	4	4447.41	4449.49	-11.9405	-4.06906	0.769407	4458.84	0	2.63099	4449.12	-40.8804	shARL13b_1	VC2842	11.9405	276.12	276.12
Cell_09	4	5408.93	5410.65	-7.79812	-5.52529	0.52162	5417.38	0	3.01761	5409.89	-30.7553	shARL13b_1	VC2842	7.79812	97.13	97.13
Cell_09	4	6724.13	6725.72	-19.5089	-4.92288	0.419124	6734.76	0	2.85126	6725.47	-59.4015	shARL13b_1	VC2842	19.5089	304.51	304.51
Cell_09	4	9140.29	9142.31	-12.7058	-4.85378	0.792331	9147.62	0	2.39594	9142	-33.6849	shARL13b_1	VC2842	12.7058	1859.6	1859.6
Cell_09	4	9675.4	9676.38	-18.9625	-4.35291	0.522045	9686.12	0	2.65476	9676.11	-57.4938	shARL13b_1	VC2842	18.9625	535.11	535.11
Cell_09	4	10315.3	10318	-21.102	-3.47638	0.641111	10327.4	0	2.90128	10317.6	-71.2404	shARL13b_1	VC2842	21.102	639.9	639.9
Cell_09	4	10595.4	10597	-7.22671	-4.62604	0.59587	10602.6	0	3.4393	10596.1	-30.5001	shARL13b_1	VC2842	7.22671	280.1	280.1
Cell_09	4	12672	12675	-18.326	-3.63361	1.24789	12690.5	0	3.57949	12673.6	-99.2486	shARL13b_1	VC2842	18.326	1140.5	1140.5
Cell_09	4	14188.9	14190.7	-19.0665	-6.50681	0.567487	14196.8	0	2.81014	14189.7	-66.525	shARL13b_1	VC2842	19.0665	1128.9	1128.9
Cell_09	4	14811.2	14813.1	-13.9946	-6.67765	0.553001	14820.6	0	3.58576	14812.2	-54.851	shARL13b_1	VC2842	13.9946	227.2	227.2
Cell_09	4	16133.1	16134.2	-10.5927	-7.83927	0.811901	16138.1	0	2.41082	16133.7	-23.657	shARL13b_1	VC2842	10.5927	1321.9	1321.9
Cell_09	4	16434.5	16438.3	-21.9322	-7.12046	0.753753	16449	0	4.24379	16437.1	-119.496	shARL13b_1	VC2842	21.9322	301.4	301.4
Cell_09	4	17176.2	17178.1	-10.2285	-7.59957	0.542408	17181.2	0	3.11353	17176.8	-28.5041	shARL13b_1	VC2842	10.2285	397.6	397.6
Cell_09	4	19034.6	19037.8	-12.2138	-4.80261	1.19589	19051	0	2.63245	19036.7	-49.9629	shARL13b_1	VC2842	12.2138	666.1	666.1
Cell_09	4	19223.2	19226	-16.8472	-4.94164	0.683374	19231.3	0	3.78663	19225.1	-58.9732	shARL13b_1	VC2842	16.8472	188.6	188.6
Cell_09	9	3858.98	3860.63	-11.2563	-40.0192	0.862519	3867.27	0	2.92056	3859.59	-38.5131	shARL13b_1	VC2842	11.2563	3858.98	3858.98
Cell_09	9	4500.96	4502.87	-9.78565	-41.5205	1.43879	4507.92	0	3.44694	4501.46	-38.639	shARL13b_1	VC2842	9.78565	325.15	325.15
Cell_09	9	6718.16	6720.72	-11.979	-40.4375	0.772732	6723.34	0	2.81624	6718.8	-34.9625	shARL13b_1	VC2842	11.979	1883.54	1883.54
Cell_09	9	14311.8	14316.2	-29.8949	-36.3401	0.823147	14327	0	5.26831	14315.1	-144.874	shARL13b_1	VC2842	29.8949	5821.32	5821.32
Cell_09	9	17811.8	17812.9	-14.9389	-34.3469	0.452177	17819	0	2.80822	17812.5	-54.5476	shARL13b_1	VC2842	14.9389	3362.7	3362.7
Cell_13	1	3296.43	3299.57	-7.66582	-69.3907	1.03971	3307.14	0	3.78544	3298.5	-34.3355	shARL13b_1	VC2842	7.66582	3296.43	3296.43
Cell_13	1	3625.62	3633.49	-11.601	-68.6052	0.60299	3646.61	0	5.4322	3631.57	-59.5807	shARL13b_1	VC2842	11.601	329.19	329.19
Cell_13	2	2616.9	2618.35	-14.0052	-65.1694	0.912729	2624.6	0	4.42579	2617.63	-55.8228	shARL13b_1	VC2842	14.0052	513.87	513.87
Cell_13	2	9060.61	9066.73	-10.4184	-64.8135	1.03234	9074.81	0	4.61826	9066.27	-47.1163	shARL13b_1	VC2842	10.4184	543.97	543.97
Cell_13	3	2810.94	2812.3	-14.7998	-65.101	0.459742	2822.17	0	4.05989	2811.47	-66.1445	shARL13b_1	VC2842	14.7998	1113.76	1113.76
Cell_13	3	7544.2	7549.91	-10.6757	-61.1014	2.92715	7559.62	0	7.47354	7547.37	-61.4266	shARL13b_1	VC2842	10.6757	1791.93	1791.93
Cell_13	3	15358	15359.6	-10.9466	-62.8387	0.995005	15372.4	0	2.98482	15358.8	-47.7121	shARL13b_1	VC2842	10.9466	657.2	657.2
Cell_13	4	4437.12	4439.29	-6.50043	-60.3391	1.25959	4444.56	0	4.27623	4438.28	-24.6228	shARL13b_1	VC2842	6.50043	4437.12	4437.12
Cell_13	4	8497.68	8498.87	-11.3289	-57.7865	0.670416	8504.67	0	3.22719	8498.49	-34.5812	shARL13b_1	VC2842	11.3289	568.84	568.84
Cell_13	4	11686.7	11689.1	-7.73771	-57.527	0.475243	11694.3	0	3.70126	11687.8	-28.3126	shARL13b_1	VC2842	7.73771	1713.44	1713.44
Cell_13	4	18666.4	18668.1	-9.03796	-56.6603	0.703862	18674.4	0	4.5608	18667.4	-37.843	shARL13b_1	VC2842	9.03796	6979.7	6979.7
Cell_13	5	1785.51	1786.75	-10.5823	-56.0498	0.571458	1794.78	0	5.09745	1786.2	-40.7412	shARL13b_1	VC2842	10.5823	25.15	25.15
Cell_13	6	3266.34	3270.58	-13.1334	-51.1179	1.86387	3288.3	0	4.6267	3269.41	-96.02	shARL13b_1	VC2842	13.1334	3266.34	3266.34
Cell_13	6	6268.55	6271.03	-11.2886	-50.7902	0.903529	6279.78	0	4.84301	6269.59	-57.6074	shARL13b_1	VC2842	11.2886	560.65	560.65
Cell_13	6	10033	10034.5	-16.6296	-49.7155	0.730191	10053.7	0	4.47774	10033.9	-101.591	shARL13b_1	VC2842	16.6296	1014.99	1014.99
Cell_13	6	16912.6	16914.8	-20.7645	-48.1927	1.01687	16935.1	0	4.71844	16913.5	-140.547	shARL13b_1	VC2842	20.7645	1765.2	1765.2
Cell_13	7	12633.3	12636.4	-11.1511	-45.7025	1.37784	12649.2	0	5.3321	12634.2	-67.333	shARL13b_1	VC2842	11.1511	2683.86	2683.86
Cell_13	8	11712.3	11712.9	-7.04117	-43.6849	0.417274	11721.6	0	5.12013	11712.8	-37.7842	shARL13b_1	VC2842	7.04117	1485.8	1485.8
Cell_13	8	12972	12974.2	-14.5079	-42.8953	1.07396	12984.9	0	3.76833	12973.1	-66.518	shARL13b_1	VC2842	14.5079	1259.7	1259.7
Cell_13	9	9832.55	9837.94	-40.6161	-41.5614	1.70914	9864.89	0	8.65844	9836.16	-431.841	shARL13b_1	VC2842	40.6161	756.55	756.55
Cell_13	9	19817.6	19819.8	-7.85596	-39.9773	0.858443	19836.9	0	8.50288	19819.3	-66.3062	shARL13b_1	VC2842	7.85596	1776.7	1776.7
Cell_13	10	9583.18	9586	-10.5836	-37.7011	2.13985	9599.17	0	6.99544	9584.35	-85.2718	shARL13b_1	VC2842	10.5836	142.48	142.48
Cell_13	10	19398	19399.7	-10.1617	-36.5667	1.37247	19408.3	0	4.64467	19398.8	-41.5102	shARL13b_1	VC2842	10.1617	1428.3	1428.3
Cell_14	1	17314.9	17316.3	-15.528	-22.0086	0.973744	17326.3	0	2.20684	17315.5	-53.3802	shARL13b_1	VC2842	15.528	17314.9	17314.9
Cell_14	2	2182.68	2184.05	-18.7697	-19.5846	0.543555	2192.56	0	2.38622	2183.72	-59.5244	shARL13b_1	VC2842	18.7697	2182.68	2182.68
Cell_14	2	13825.9	13827.1	-9.71683	-18.0292	0.605857	13836.1	0	2.26269	13826.6	-43.3337	shARL13b_1	VC2842	9.71683	11643.2	11643.2
Cell_14	2	17935.4	17936.1	-9.54952	-16.878	0.3175	17941.5	0	3.44743	17935.9	-30.9298	shARL13b_1	VC2842	9.54952	4109.5	4109.5
Cell_14	3	1173.33	1174.91	-18.4878	-14.3124	0.711053	1185.57	0	2.98209	1174.25	-75.2428	shARL13b_1	VC2842	18.4878	1173.33	1173.33
Cell_14	3	7337.26	7338.56	-15.516	-20.3662	0.717884	7345.65	0	2.0444	7337.91	-44.8797	shARL13b_1	VC2842	15.516	6163.93	6163.93
Cell_14	3	17371.2	17373.9	-8.45113	-14.8519	1.22169	17385	0	4.14699	17372.5	-49.6637	shARL13b_1	VC2842	8.45113	10033.9	10033.9
Cell_14	4	8975.25	8978.15	-15.7639	-11.1159	0.518853	8984.14	0	3.03154	8977.58	-54.3076	shARL13b_1	VC2842	15.7639	8975.25	8975.25
Cell_14	5	3863.87	3865.03	-18.7608	-12.1778	0.442731	3871.74	0	3.21084	3864.45	-69.4128	shARL13b_1	VC2842	18.7608	3863.87	3863.87
Cell_14	5	8834.76	8836.59	-18.8703	-13.2027	0.560252	8847.02	0	2.37179	8836.06	-70.5034	shARL13b_1	VC2842	18.8703	4970.89	4970.89
Cell_14	5	9772.22	9772.76	-10.4109	-12.4768	0.291004	9778.61	0	1.91763	9772.74	-32.2684	shARL13b_1	VC2842	10.4109	937.46	937.46
Cell_14	5	11510.4	11511.5	-14.0152	-11.131	0.494494	11517.4	0	1.54029	11511.2	-29.2608	shARL13b_1	VC2842	14.0152	1738.18	1738.18
Cell_14	5	17169	17173.3	-33.4599	-11.2177	0.596164	17185.4	0	3.05065	17172.8	-144.321	shARL13b_1	VC2842	33.4599	5658.6	5658.6
Cell_14	6	17063.8	17066.9	-29.4782	-9.13255	0.500327	17079	0	2.90122	17066.6	-126.331	shARL13b_1	VC2842	29.4782	17063.8	17063.8
Cell_14	6	19513.3	19515.5	-23.4014	-8.08659	1.09439	19523.9	0	5.13868	19514.4	-113.504	shARL13b_1	VC2842	23.4014	2449.5	2449.5
Cell_14	7	16044.1	16046.2	-15.6963	-9.08385	0.758105	16053.7	0	3.50982	16045.3	-64.3329	shARL13b_1	VC2842	15.6963	16044.1	16044.1
Cell_14	7	18601.3	18602.3	-24.6376	-8.46166	0.404949	18610.8	0	3.66584	18602	-93.7312	shARL13b_1	VC2842	24.6376	2557.2	2557.2
Cell_14	8	2975.93	2979.45	-15.3533	-7.85832	0.754292	2988.2	0	3.5197	2978.65	-64.6088	shARL13b_1	VC2842	15.3533	2975.93	2975.93
Cell_14	8	16603.6	16604.6	-14.4401	-8.3992	0.597176	16610.9	0	1.99883	16604.3	-38.4577	shARL13b_1	VC2842	14.4401	13627.7	13627.7
Cell_14	9	1362.05	1363.26	-12.3768	-8.33851	0.469736	1369.63	0	2.54208	1362.45	-44.256	shARL13b_1	VC2842	12.3768	1362.05	1362.05
Cell_14	9	19510.4	19514.3	-14.8491	-6.66512	0.696435	19521.1	0	2.32724	19513.8	-38.0749	shARL13b_1	VC2842	14.8491	18148.3	18148.3
Cell_14	10	3954.13	3956.01	-10.8747	-7.35618	1.15512	3961.3	0	2.84633	3954.87	-36.1673	shARL13b_1	VC2842	10.8747	3954.13	3954.13
Cell_04	1	10889.9	10891.9	-12.0656	-25.1228	0.545197	10908.7	0	4.30037	10890.6	-76.8239	shARL13b_2	VC2842	12.0656	2650.25	2650.25
Cell_04	1	14141.5	14142.5	-20.2267	-26.099	0.472744	14154.2	0	2.69863	14142.2	-68.0443	shARL13b_2	VC2842	20.2267	2835.7	2835.7
Cell_04	1	17501.2	17502.8	-8.16224	-24.7602	0.63377	17512.5	0	4.0232	17502.4	-32.7701	shARL13b_2	VC2842	8.16224	2634.5	2634.5
Cell_04	2	11813.8	11815	-15.959	-23.8908	0.455766	11828.9	0	2.54988	11814.7	-59.3337	shARL13b_2	VC2842	15.959	1732.9	1732.9
Cell_04	2	15655.3	15659.7	-11.9589	-24.3569	0.445655	15665.5	0	2.75076	15659.4	-41.2986	shARL13b_2	VC2842	11.9589	3323.4	3323.4
Cell_04	3	7134.95	7137.62	-10.7857	-25.713	0.94011	7149.12	0	4.00058	7135.86	-67.3182	shARL13b_2	VC2842	10.7857	3293.1	3293.1
Cell_04	3	18396.5	18397.6	-12.85	-25.2604	0.512524	18411.4	0	2.88651	18397.1	-54.5988	shARL13b_2	VC2842	12.85	2097.3	2097.3
Cell_04	4	12512.2	12513.1	-10.1524	-21.1338	0.298068	12519.8	0	1.99881	12512.8	-30.4474	shARL13b_2	VC2842	10.1524	1567.7	1567.7
Cell_04	5	15150.8	15151.4	-8.87795	-23.1836	0.313321	15156.8	0	1.77191	15151.4	-22.4852	shARL13b_2	VC2842	8.87795	2000.2	2000.2
Cell_04	5	18753.3	18754.9	-28.9234	-22.1441	0.50083	18769.3	0	3.03283	18754	-121.534	shARL13b_2	VC2842	28.9234	2636.1	2636.1
Cell_04	5	19570.2	19576.7	-9.81697	-22.3117	2.73207	19587.2	0	6.36724	19573.4	-69.8593	shARL13b_2	VC2842	9.81697	816.9	816.9
Cell_04	6	12905.5	12907.2	-6.09284	-22.5385	0.770747	12912.3	0	3.43994	12906.4	-25.8474	shARL13b_2	VC2842	6.09284	6238.31	6238.31
Cell_04	7	1123.15	1124.12	-30.8707	-19.5562	0.460339	1136.86	0	2.66741	1123.76	-109.379	shARL13b_2	VC2842	30.8707	1123.15	1123.15
Cell_04	7	10508.2	10509.4	-16.5454	-19.1907	0.502934	10520.1	0	2.29187	10509	-49.3208	shARL13b_2	VC2842	16.5454	4299.88	4299.88
Cell_04	7	15090.9	15098.2	-9.35188	-18.7792	1.90214	15120.7	0	7.189	15096.1	-91.6014	shARL13b_2	VC2842	9.35188	4582.7	4582.7
Cell_04	8	7332.15	7334.17	-9.47476	-18.3327	0.473916	7343.44	0	3.64018	7332.88	-41.0754	shARL13b_2	VC2842	9.47476	7332.15	7332.15
Cell_04	8	16250.5	16252.7	-10.2757	-18.8011	0.845977	16258	0	2.38672	16252	-24.2141	shARL13b_2	VC2842	10.2757	2607.9	2607.9
Cell_04	9	11717.9	11719.1	-8.22152	-18.707	0.736781	11724.2	0	1.9946	11718.5	-26.0355	shARL13b_2	VC2842	8.22152	4415.09	4415.09
Cell_04	9	13693.2	13694.2	-9.49829	-19.3591	0.480969	13704.1	0	3.03336	13693.7	-46.3784	shARL13b_2	VC2842	9.49829	627.3	627.3
Cell_04	9	19557.1	19560.9	-8.54794	-18.7647	2.71078	19570.5	0	5.05572	19559.5	-47.6296	shARL13b_2	VC2842	8.54794	793.2	793.2
Cell_04	10	10476.4	10478.4	-6.91995	-19.8315	0.661301	10482.5	0	2.28851	10478	-12.7708	shARL13b_2	VC2842	6.91995	1433.15	1433.15
Cell_04	10	10877.9	10879.5	-8.30522	-19.3919	0.899301	10883.4	0	1.66771	10878.9	-17.2859	shARL13b_2	VC2842	8.30522	401.5	401.5
Cell_04	10	19196.6	19199.8	-7.72952	-16.5744	1.86658	19205.3	0	2.80586	19197.9	-32.6585	shARL13b_2	VC2842	7.72952	3461.5	3461.5
Cell_12	1	8397.95	8401.3	-13.1394	-55.2929	0.635986	8406.97	0	1.89185	8400.98	-30.3838	shARL13b_2	VC2842	13.1394	1850.03	1850.03
Cell_12	1	17055.2	17057.9	-8.55415	-52.8897	1.04104	17072.8	0	2.43246	17057.3	-46.1488	shARL13b_2	VC2842	8.55415	552.3	552.3
Cell_12	2	6501.58	6502.77	-19.0098	-49.209	0.564125	6507.27	0	2.32081	6502.31	-43.1218	shARL13b_2	VC2842	19.0098	2076.79	2076.79
Cell_12	2	13109.6	13114.3	-11.4379	-48.4496	1.21433	13119.9	0	3.42521	13113.2	-29.6629	shARL13b_2	VC2842	11.4379	27.7	27.7
Cell_12	3	2484.85	2487.38	-21.2315	-45.7361	0.470365	2492.62	0	2.19251	2487.09	-43.0364	shARL13b_2	VC2842	21.2315	478.03	478.03
Cell_12	3	12297.9	12299.1	-11.8608	-44.0352	0.488621	12302.6	0	1.92716	12298.9	-21.8761	shARL13b_2	VC2842	11.8608	439.8	439.8
Cell_12	3	16062.8	16065	-7.76397	-44.5186	0.885702	16069.5	0	2.11532	16064.3	-20.1401	shARL13b_2	VC2842	7.76397	1508.3	1508.3
Cell_12	4	3735.57	3736.47	-12.2371	-42.1391	0.415225	3740.02	0	1.65198	3736.27	-19.0086	shARL13b_2	VC2842	12.2371	46.86	46.86
Cell_12	4	8290.05	8291.13	-52.2388	-42.5358	0.445906	8301.33	0	1.93212	8290.76	-122.281	shARL13b_2	VC2842	52.2388	171.42	171.42
Cell_12	5	3911.44	3915.22	-9.96194	-40.9281	0.554166	3920.67	0	2.08909	3914.71	-27.9685	shARL13b_2	VC2842	9.96194	98.04	98.04
Cell_12	5	9189.05	9189.9	-9.47065	-43.1963	0.454259	9196.33	0	2.539	9189.67	-25.8628	shARL13b_2	VC2842	9.47065	83.94	83.94
Cell_12	5	13360.7	13364.9	-20.1092	-40.0531	0.494639	13372.8	0	2.29749	13364.6	-65.3312	shARL13b_2	VC2842	20.1092	879.4	879.4
Cell_12	5	16703.3	16704	-8.83816	-40.9602	0.292155	16707.2	0	1.30057	16703.9	-15.6089	shARL13b_2	VC2842	8.83816	76.9	76.9
Cell_12	5	19795.1	19798.8	-16.145	-40.4466	0.576824	19806	0	2.85776	19798.5	-51.6091	shARL13b_2	VC2842	16.145	295.8	295.8
Cell_12	6	17910.9	17913.3	-15.0325	-40.6313	0.641056	17919.3	0	2.7747	17912.8	-48.1947	shARL13b_2	VC2842	15.0325	163.5	163.5
Cell_12	7	3617.1	3618.3	-10.8135	-40.6814	0.412694	3625.26	0	1.5347	3618.04	-23.5863	shARL13b_2	VC2842	10.8135	1422.26	1422.26
Cell_12	7	10566.1	10568.8	-13.2546	-41.7686	1.03958	10580.1	0	4.65858	10566.7	-83.1794	shARL13b_2	VC2842	13.2546	2230.96	2230.96
Cell_12	7	18342.6	18344.6	-21.1081	-40.7628	0.537442	18353.1	0	2.7085	18343.8	-67.1814	shARL13b_2	VC2842	21.1081	382.3	382.3
Cell_12	8	780.553	785.204	-7.74588	-40.3252	0.959417	789.172	0	2.70601	783.9	-26.8837	shARL13b_2	VC2842	7.74588	228.75	228.753
Cell_12	8	4991.78	4993.15	-10.5598	-40.3492	0.848729	5000.82	0	3.24074	4992.74	-32.9485	shARL13b_2	VC2842	10.5598	283.03	283.03
Cell_12	8	8982.17	8983.55	-8.89779	-40.8699	0.39917	8988.16	0	2.46166	8982.57	-27.8934	shARL13b_2	VC2842	8.89779	1036.47	1036.47
Cell_12	8	12085.2	12087	-7.03151	-40.6061	0.739928	12095.2	0	3.46818	12086.2	-32.4897	shARL13b_2	VC2842	7.03151	711.8	711.8
Cell_12	8	18280.4	18283.2	-10.0574	-40.1929	1.51068	18289.2	0	3.54271	18281.9	-35.6946	shARL13b_2	VC2842	10.0574	1848.8	1848.8
Cell_02	2	3773.38	3775.86	-6.51466	-29.6788	1.47209	3784.59	0	3.18569	3774.21	-22.659	CTL	VC2843	6.51466	1375.07	1375.07
Cell_02	2	10446.9	10448	-8.78214	-31.0123	0.336775	10452	0	2.25988	10447.5	-18.8357	CTL	VC2843	8.78214	909.41	909.41
Cell_02	3	13073.9	13074.5	-15.2048	-28.0751	0.361634	13083.8	0	1.92079	13074.5	-44.3105	CTL	VC2843	15.2048	5635.62	5635.62
Cell_02	3	16071.1	16075.4	-9.77812	-29.8028	2.06521	16084.6	0	5.47509	16074.2	-55.7149	CTL	VC2843	9.77812	2579	2579
Cell_02	7	4409.17	4411.7	-8.41933	-21.4878	1.75349	4418.19	0	3.0712	4409.8	-29.7616	CTL	VC2843	8.41933	2410.19	2410.19
Cell_02	6	3899.89	3901.62	-14.6211	-24.6977	0.403928	3911.99	0	2.22004	3901.28	-44.5712	CTL	VC2843	14.6211	1773.81	1773.81
Cell_02	8	2515.23	2518.17	-8.651	-20.1025	1.15609	2539.35	0	4.28902	2516.22	-72.9892	CTL	VC2843	8.651	2515.23	2515.23
Cell_02	5	13249.9	13250.7	-13.05	-25.7378	0.391438	13262.4	0	2.3054	13250.5	-48.4007	CTL	VC2843	13.05	10373	10373
Cell_02	5	19399	19399.7	-9.13895	-26.145	0.376574	19404.8	0	2.58428	19399.5	-25.9932	CTL	VC2843	9.13895	4368.3	4368.3
Cell_02	9	4734.44	4735.22	-10.7917	-17.2168	0.37265	4753.78	0	2.29076	4734.96	-50.0216	CTL	VC2843	10.7917	1016.46	1016.46
Cell_02	9	16951.4	16953.2	-9.04469	-16.8402	0.723068	16961.2	0	2.18067	16951.9	-30.4024	CTL	VC2843	9.04469	4193.2	4193.2
Cell_02	10	7868.45	7873.43	-11.7285	-16.1642	0.438507	7878.62	0	2.14315	7873.17	-28.7373	CTL	VC2843	11.7285	206.17	206.17
Cell_02	11	2562.56	2563.56	-5.48847	-15.1352	0.294393	2569.84	0	1.96186	2562.89	-19.8273	CTL	VC2843	5.48847	1857.07	1857.07
Cell_02	11	16300.5	16302.7	-10.2247	-11.8206	0.71929	16309.1	0	2.6074	16302	-28.1195	CTL	VC2843	10.2247	683.4	683.4
Cell_02	12	10375.2	10376	-9.13295	-10.6055	0.45672	10380	0	2.36556	10375.7	-17.7595	CTL	VC2843	9.13295	2594.21	2594.21
Cell_02	12	18277.6	18280.8	-9.77747	-9.46052	1.304	18287.9	0	5.66904	18278.7	-50.8862	CTL	VC2843	9.77747	3510.3	3510.3
Cell_02	14	12249.5	12250.9	-7.47801	-9.71555	0.6612	12258.7	0	3.2364	12250	-35.9514	CTL	VC2843	7.47801	3350.68	3350.68
Cell_02	15	12576.7	12577.7	-15.1545	-6.40881	0.476336	12582.2	0	1.90348	12577.3	-29.2315	CTL	VC2843	15.1545	10879.5	10879.5
Cell_02	16	16067.6	16069	-14.2874	-4.50464	0.433245	16077.2	0	2.48459	16068.1	-46.3948	CTL	VC2843	14.2874	4147.1	4147.1
Cell_02	17	9048.83	9052.54	-7.58396	-2.15074	2.02437	9056.64	0	3.79013	9050.58	-27.0042	CTL	VC2843	7.58396	5841.84	5841.84
Cell_02	21	5485.43	5487.83	-12.4208	-1.20185	0.908692	5499.3	0	4.87265	5486.29	-70.814	CTL	VC2843	12.4208	3747.54	3747.54
Cell_02	21	8819.66	8823.99	-8.50221	-1.01909	0.616592	8832.99	0	4.03793	8823.24	-45.6734	CTL	VC2843	8.50221	1192.98	1192.98
Cell_02	21	16943.6	16947.2	-8.2819	0.127934	1.14453	16955	0	5.62926	16946.1	-36.6051	CTL	VC2843	8.2819	2444.2	2444.2
Cell_03	1	7607.03	7612.3	-10.2493	-64.0604	1.49474	7630.09	0	2.65927	7611.05	-61.508	CTL	VC2843	10.2493	4899.78	4899.78
Cell_03	2	7866.88	7870.83	-6.92098	-57.5197	0.659089	7880.15	0	2.89267	7869.88	-27.8724	CTL	VC2843	6.92098	2734.65	2734.65
Cell_03	3	4129.23	4132.57	-13.4137	-55.098	0.569376	4142.74	0	2.08358	4132.09	-40.5904	CTL	VC2843	13.4137	2000.14	2000.14
Cell_03	4	10656.4	10660.9	-16.6474	-52.1328	0.474222	10668.8	0	2.62987	10660.2	-55.9558	CTL	VC2843	16.6474	7952.04	7952.04
Cell_03	4	14369.5	14371	-18.4567	-54.4558	0.647609	14382.9	0	4.19729	14370.1	-89.03	CTL	VC2843	18.4567	1359.7	1359.7
Cell_03	4	15870.3	15872	-11.5707	-57.1239	0.998192	15884.7	0	3.49385	15870.8	-63.5697	CTL	VC2843	11.5707	1427.8	1427.8
Cell_03	5	3688.61	3691.88	-10.7645	-53.1023	0.565592	3698.05	0	2.00261	3691.21	-24.3939	CTL	VC2843	10.7645	3688.61	3688.61
Cell_03	6	6684.95	6689.13	-15.22	-49.5381	1.22022	6698.55	0	6.42191	6687.54	-82.2328	CTL	VC2843	15.22	6684.95	6684.95
Cell_03	7	17949.7	17951.1	-10.4997	-46.9341	0.506811	17958.5	0	2.92443	17950.4	-40.3452	CTL	VC2843	10.4997	14778.1	14778.1
Cell_03	8	610.701	612.247	-11.6202	-45.6179	0.567284	621.315	0	3.28646	611.486	-37.9384	CTL	VC2843	11.6202	610.7	610.701
Cell_03	8	10140.1	10141.5	-8.29422	-45.5691	0.527383	10153.4	0	3.65934	10140.7	-35.018	CTL	VC2843	8.29422	3310.67	3310.67
Cell_03	8	15199.3	15202.6	-10.1007	-44.4219	1.15255	15211.6	0	2.43697	15202.2	-35.8198	CTL	VC2843	10.1007	908.6	908.6
Cell_03	9	9311.98	9314.67	-13.2424	-45.6017	0.923108	9322.44	0	3.45063	9313.17	-63.9918	CTL	VC2843	13.2424	1987.41	1987.41
Cell_03	10	13184.4	13185.9	-14.8087	-43.9132	0.624443	13193.2	0	3.5576	13185.6	-43.4233	CTL	VC2843	14.8087	12160.4	12160.4
Cell_03	14	1000.65	1002.35	-7.06948	-40.8614	0.442054	1012.13	0	3.64637	1002.09	-26.7759	CTL	VC2843	7.06948	234.77	234.774
Cell_03	14	8543.87	8545.06	-8.06803	-41.2238	0.62199	8552.65	0	1.95328	8544.56	-32.6861	CTL	VC2843	8.06803	2445.19	2445.19
Cell_03	15	5619.04	5621.59	-12.2393	-39.9208	0.598638	5630.83	0	3.00028	5621.22	-51.8948	CTL	VC2843	12.2393	1173.89	1173.89
Cell_03	15	15740.1	15743.5	-7.45518	-39.0049	0.584651	15751.8	0	4.03205	15740.7	-31.1273	CTL	VC2843	7.45518	948.1	948.1
Cell_03	16	2522.55	2524.17	-19.6719	-37.9208	0.734191	2535.87	0	3.84714	2523.35	-94.4151	CTL	VC2843	19.6719	1046.2	1046.2
Cell_03	16	9865.81	9868.13	-13.0912	-37.8239	0.463391	9875.47	0	2.74507	9867.77	-47.4255	CTL	VC2843	13.0912	3327.2	3327.2
Cell_03	16	18302.6	18303.6	-6.72462	-38.6607	0.573572	18314.3	0	3.28324	18303.1	-37.0716	CTL	VC2843	6.72462	312.2	312.2
Cell_03	17	12943.3	12944.8	-9.01794	-36.5873	0.535238	12956.1	0	2.90368	12944.4	-42.8487	CTL	VC2843	9.01794	4719.49	4719.49
Cell_03	6	12265.7	12271.9	-9.41816	-47.8632	0.590285	12279.8	0	3.93682	12271	-44.2855	CTL	VC2843	9.41816	2898.18	2898.18
Cell_01	2	13285.1	13287.1	-11.8601	-48.5401	0.825927	13304.5	0	5.23473	13286.3	-81.6985	shARL13b_1	VC2843	11.8601	13285.1	13285.1
Cell_01	2	19015.3	19017.2	-10.7538	-46.4847	0.743006	19035	0	2.88695	19016.8	-56.4792	shARL13b_1	VC2843	10.7538	3922.6	3922.6
Cell_01	3	860.029	864.184	-16.6325	-44.3168	1.10589	877.436	0	4.98369	863.267	-83.2837	shARL13b_1	VC2843	16.6325	860.03	860.029
Cell_01	3	3604.6	3606.7	-10.3423	-45.6571	1.45923	3624.26	0	4.785	3605.39	-83.1082	shARL13b_1	VC2843	10.3423	1766.72	1766.72
Cell_01	3	4327.99	4330.52	-14.7112	-44.6695	0.532694	4340.09	0	4.40235	4328.81	-70.0694	shARL13b_1	VC2843	14.7112	723.39	723.39
Cell_01	3	7505.73	7510.72	-16.8905	-43.4242	0.978578	7519.66	0	4.93397	7509.39	-83.6059	shARL13b_1	VC2843	16.8905	374.34	374.34
Cell_01	3	12667.5	12668.6	-17.778	-42.4086	0.455113	12680	0	3.00538	12668	-63.6475	shARL13b_1	VC2843	17.778	5161.77	5161.77
Cell_01	3	15719	15720.5	-12.0782	-40.6011	0.580141	15727.8	0	4.74182	15719.7	-55.0558	shARL13b_1	VC2843	12.0782	1533.7	1533.7
Cell_01	4	9315.51	9321.87	-10.638	-38.4157	0.876588	9330.66	0	4.332	9320.71	-55.6356	shARL13b_1	VC2843	10.638	9315.51	9315.51
Cell_01	4	19649.1	19652.3	-8.1733	-37.1634	0.827022	19658.4	0	2.93258	19650.9	-34.1849	shARL13b_1	VC2843	8.1733	3889.5	3889.5
Cell_01	6	14148.5	14150.1	-8.52184	-30.4124	0.636483	14155.2	0	2.96326	14149.3	-28.6011	shARL13b_1	VC2843	8.52184	4341.74	4341.74
Cell_01	7	18318.5	18319.8	-6.51892	-25.6221	0.38443	18325.2	0	1.67184	18318.9	-15.6706	shARL13b_1	VC2843	6.51892	18318.5	18318.5
Cell_01	8	7905.52	7907.42	-23.7524	-24.7093	0.540982	7922.81	0	3.3301	7906.3	-108.52	shARL13b_1	VC2843	23.7524	700.66	700.66
Cell_01	8	12361	12362.9	-5.93826	-25.6288	1.46452	12381.3	0	5.58498	12361.6	-65.5697	shARL13b_1	VC2843	5.93826	4455.48	4455.48
Cell_01	9	7572.46	7575.91	-9.66739	-19.7635	1.16717	7593.32	0	3.98801	7574.2	-79.5574	shARL13b_1	VC2843	9.66739	7572.46	7572.46
Cell_01	9	13857.6	13860.7	-7.5091	-20.2554	1.43503	13870.5	0	4.9081	13858.5	-42.0478	shARL13b_1	VC2843	7.5091	2008.1	2008.1
Cell_01	9	16951.1	16953.4	-11.5485	-20.6896	0.613621	16970.7	0	3.06293	16952.2	-69.0824	shARL13b_1	VC2843	11.5485	1815.4	1815.4
Cell_01	11	2905.93	2908.87	-10.6388	-15.6545	0.430261	2916.92	0	3.46143	2907.42	-38.8169	shARL13b_1	VC2843	10.6388	2905.93	2905.93
Cell_01	11	4854.93	4860.78	-11.2558	-14.9159	0.5116	4868.4	0	4.50026	4860.24	-50.0592	shARL13b_1	VC2843	11.2558	1949	1949
Cell_01	11	15922.6	15924.8	-9.83184	-15.3146	0.981851	15929.7	0	3.57376	15924.3	-34.3746	shARL13b_1	VC2843	9.83184	1888.3	1888.3
Cell_01	11	18230.1	18234.2	-6.20845	-13.2739	1.3703	18245	0	2.89225	18232.9	-32.7632	shARL13b_1	VC2843	6.20845	2307.5	2307.5
Cell_01	12	10017.3	10019.1	-13.4034	-13.989	0.547067	10027.2	0	3.67691	10018.1	-62.1758	shARL13b_1	VC2843	13.4034	4477.55	4477.55
Cell_01	12	15877.8	15879.8	-7.53117	-12.708	0.892065	15887.1	0	4.63144	15879	-37.1923	shARL13b_1	VC2843	7.53117	1537.8	1537.8
Cell_04	1	1427.01	1428.04	-7.84827	-50.5071	0.511547	1433.24	0	2.20941	1427.72	-19.6057	shARL13b_1	VC2843	7.84827	334.22	334.22
Cell_04	1	7637.42	7638.29	-16.6587	-44.1078	0.362892	7651.06	0	2.59976	7638.01	-55.3594	shARL13b_1	VC2843	16.6587	206.18	206.18
Cell_04	1	12072.4	12073.6	-20.8258	-42.4126	0.501966	12080.1	0	2.6596	12073.1	-64.7101	shARL13b_1	VC2843	20.8258	1576.4	1576.4
Cell_04	1	17579.9	17583.4	-10.7483	-39.7093	0.831272	17588.5	0	2.26124	17583.1	-22.0114	shARL13b_1	VC2843	10.7483	1492.3	1492.3
Cell_04	1	19526.5	19530.7	-8.04462	-35.2044	0.830192	19534.2	0	2.02009	19530.3	-15.6194	shARL13b_1	VC2843	8.04462	1561.8	1561.8
Cell_04	2	2700.9	2706.12	-27.2923	-33.7977	0.449953	2713.27	0	2.92252	2705.36	-94.9896	shARL13b_1	VC2843	27.2923	2700.9	2700.9
Cell_04	2	10807.4	10808.3	-8.06652	-32.9489	0.428564	10812.3	0	2.47622	10807.9	-23.1662	shARL13b_1	VC2843	8.06652	7360.07	7360.07
Cell_04	3	9540.26	9541.41	-18.3968	-31.6883	0.5896	9547.59	0	2.68137	9540.98	-67.1153	shARL13b_1	VC2843	18.3968	1126.58	1126.58
Cell_04	3	14227.7	14233	-13.5646	-25.2289	2.74961	14246.9	0	6.69359	14230.3	-92.3997	shARL13b_1	VC2843	13.5646	1768.6	1768.6
Cell_04	3	17081.8	17082.5	-14.7069	-26.4124	0.363801	17088.7	0	2.69317	17082.3	-42.8056	shARL13b_1	VC2843	14.7069	958.6	958.6
Cell_04	4	13818.5	13819.9	-8.89847	-25.4703	1.06732	13827.7	0	2.67662	13819.1	-33.6747	shARL13b_1	VC2843	8.89847	614.9	614.9
Cell_04	4	14357.5	14359	-8.85141	-23.4668	0.697891	14365.1	0	2.35288	14358.7	-27.2018	shARL13b_1	VC2843	8.85141	539	539
Cell_04	4	17798.2	17799.3	-57.5491	-23.2613	0.463595	17820.4	0	3.44732	17798.9	-289.707	shARL13b_1	VC2843	57.5491	201.9	201.9
Cell_04	4	19452	19453.7	-16.6595	-25.1067	0.536181	19462	0	2.42163	19452.6	-55.9136	shARL13b_1	VC2843	16.6595	1653.8	1653.8
Cell_04	5	2898.79	2900.87	-12.0987	-22.0442	0.575779	2927.85	0	3.29269	2900.43	-70.9303	shARL13b_1	VC2843	12.0987	1580.03	1580.03
Cell_04	5	5091.63	5092.93	-6.1624	-23.5063	0.691766	5098.48	0	2.05318	5092.35	-19.1319	shARL13b_1	VC2843	6.1624	2192.84	2192.84
Cell_04	5	13580.2	13582.4	-12.0903	-20.9114	0.781244	13588.5	0	2.53342	13581.8	-31.9463	shARL13b_1	VC2843	12.0903	2868.1	2868.1
Cell_04	10	998.585	1001.15	-8.32967	-22.0901	0.959928	1010.11	0	2.43741	999.891	-28.4753	shARL13b_1	VC2843	8.32967	998.59	998.585
Cell_04	10	1574.89	1576.41	-7.5288	-20.4493	0.445348	1581.08	0	1.3984	1576.14	-11.856	shARL13b_1	VC2843	7.5288	576.31	576.305
Cell_04	10	7787.4	7788.45	-8.58551	-23.4453	0.416196	7793.76	0	3.204	7787.82	-32.0133	shARL13b_1	VC2843	8.58551	5090.47	5090.47
Cell_04	10	10696.2	10699.3	-9.39435	-21.1228	0.565358	10702.7	0	2.25155	10698.6	-25.5122	shARL13b_1	VC2843	9.39435	594.2	594.2
Cell_04	10	13631.1	13632	-7.60426	-21.8879	0.542868	13637.5	0	2.43279	13631.7	-21.883	shARL13b_1	VC2843	7.60426	2724.4	2724.4
Cell_04	10	14462.7	14464.2	-10.6782	-21.7192	0.471037	14476.1	0	3.9937	14463.3	-48.0348	shARL13b_1	VC2843	10.6782	413.3	413.3
Cell_09	1	8487.9	8489.28	-11.6512	-40.8815	0.50396	8499.22	0	3.49377	8488.95	-52.965	shARL13b_1	VC2843	11.6512	338.5	338.5
Cell_09	1	17225.5	17226.3	-8.70827	-38.5146	0.41154	17231.9	0	2.07421	17226	-23.2567	shARL13b_1	VC2843	8.70827	3210.2	3210.2
Cell_09	2	10050.5	10052.5	-7.49584	-37.7431	1.2161	10066.1	0	5.31492	10051.7	-57.6247	shARL13b_1	VC2843	7.49584	379.87	379.87
Cell_09	2	17643.9	17645.2	-12.1853	-37.0455	0.50223	17650.7	0	2.81508	17644.6	-42.5931	shARL13b_1	VC2843	12.1853	3075.6	3075.6
Cell_09	3	1298.3	1299.28	-12.4315	-37.4768	0.502294	1312.37	0	2.71387	1298.82	-49.4239	shARL13b_1	VC2843	12.4315	1298.3	1298.3
Cell_09	3	15311.2	15312.4	-13.6629	-35.5188	0.491641	15322	0	2.18438	15311.8	-44.033	shARL13b_1	VC2843	13.6629	1227.1	1227.1
Cell_09	4	11377.3	11378.6	-6.50882	-32.3766	0.657709	11381.5	0	2.1765	11378	-14.208	shARL13b_1	VC2843	6.50882	177.7	177.7
Cell_09	4	16053	16054	-11.258	-32.4248	0.396308	16059.9	0	1.98371	16053.6	-31.2347	shARL13b_1	VC2843	11.258	181.3	181.3
Cell_09	5	3729.2	3732.07	-9.0146	-31.5126	1.52116	3743.37	0	5.78057	3730.06	-57.5421	shARL13b_1	VC2843	9.0146	899.4	899.4
Cell_09	5	6979.9	6981.45	-16.8323	-30.6163	0.590512	6991.83	0	2.91604	6980.91	-62.7396	shARL13b_1	VC2843	16.8323	2123.85	2123.85
Cell_09	5	12000.5	12002.6	-12.1813	-31.3185	0.493288	12014.3	0	3.8048	12001.8	-57.1983	shARL13b_1	VC2843	12.1813	93.1	93.1
Cell_09	6	4356.32	4357.11	-7.52678	-31.9689	0.438202	4364.06	0	1.75657	4356.84	-24.28	shARL13b_1	VC2843	7.52678	2290.63	2290.63
Cell_09	6	8273.66	8276.13	-14.6998	-31.259	1.5216	8281.06	0	2.23062	8274.94	-41.2051	shARL13b_1	VC2843	14.6998	3917.34	3917.34
Cell_09	6	15548.3	15549.5	-11.2927	-35.0511	0.865783	15561.8	0	2.79225	15548.9	-58.5424	shARL13b_1	VC2843	11.2927	4115.1	4115.1
Cell_09	7	3815.81	3816.65	-14.5852	-32.3931	0.441029	3828.42	0	3.80512	3816.37	-70.1658	shARL13b_1	VC2843	14.5852	3074.95	3074.95
Cell_09	8	1955.81	1956.91	-10.9313	-30.5238	0.478872	1967.25	0	3.79058	1956.3	-52.9613	shARL13b_1	VC2843	10.9313	163.42	163.42
Cell_09	8	12986.8	12989.8	-22.3116	-30.7094	0.375	13000.1	0	3.41551	12989.5	-83.1095	shARL13b_1	VC2843	22.3116	2707	2707
Cell_09	9	9384.33	9386.85	-11.4971	-30.379	0.68738	9394.04	0	2.38502	9386.06	-32.2835	shARL13b_1	VC2843	11.4971	3112.29	3112.29
Cell_09	9	19617.8	19618.7	-6.62103	-31.7762	0.400582	19627	0	7.05954	19618.2	-40.2003	shARL13b_1	VC2843	6.62103	345.8	345.8
Cell_09	10	5785.18	5787.55	-14.7427	-31.2777	0.412128	5801.35	0	2.70165	5787.19	-62.7035	shARL13b_1	VC2843	14.7427	57.4	57.4
Cell_09	10	12921.5	12923	-14.9457	-32.4783	0.52635	12935.8	0	3.99313	12922.2	-70.5271	shARL13b_1	VC2843	14.9457	3297.68	3297.68
Cell_09	10	19479.3	19481.1	-6.61784	-32.4384	1.23382	19485.8	0	2.11428	19480.2	-21.072	shARL13b_1	VC2843	6.61784	1767.2	1767.2
Cell_09	7	13092.2	13094.7	-9.20056	-31.9552	1.53068	13107.5	0	3.41461	13093.7	-54.2728	shARL13b_1	VC2843	9.20056	3109.37	3109.37
Cell_05	2	17649.8	17651	-12.7121	-21.6016	0.441745	17664.7	0	3.77837	17650.3	-73.3673	shARL13b_2	VC2843	12.7121	10818.4	10818.4
Cell_05	4	3625.09	3626.29	-42.9481	-21.1813	0.440587	3639.71	0	3.41094	3625.68	-193.862	shARL13b_2	VC2843	42.9481	3625.09	3625.09
Cell_05	4	19329.2	19331	-14.651	-20.7795	1.06855	19339.5	0	3.94892	19330.2	-64.2273	shARL13b_2	VC2843	14.651	5379.2	5379.2
Cell_05	5	9515.7	9522.42	-15.1414	-19.6788	1.22206	9533.58	0	4.65723	9521.18	-80.5278	shARL13b_2	VC2843	15.1414	526.81	526.81
Cell_05	5	13756.6	13758.4	-12.3734	-19.9812	0.600141	13768.8	0	4.52153	13757.4	-59.6471	shARL13b_2	VC2843	12.3734	4240.9	4240.9
Cell_05	5	13880.2	13884.5	-7.68863	-19.8258	2.6588	13894.3	0	6.76179	13881.1	-53.6975	shARL13b_2	VC2843	7.68863	123.6	123.6
Cell_05	6	18801.1	18805.1	-10.7547	-18.5848	1.01239	18815.9	0	5.46687	18803.8	-70.1212	shARL13b_2	VC2843	10.7547	2368.8	2368.8
Cell_05	8	2698.73	2702.72	-12.4942	-17.6754	1.0273	2709.6	0	4.16112	2702.32	-48.7549	shARL13b_2	VC2843	12.4942	611.96	611.96
Cell_05	9	14173.5	14176.9	-8.05067	-16.6379	2.21732	14187.9	0	4.69078	14174.8	-49.034	shARL13b_2	VC2843	8.05067	14173.5	14173.5
Cell_05	10	2539.88	2542.56	-7.72613	-16.5414	0.541334	2555.04	0	4.3493	2541.61	-52.1573	shARL13b_2	VC2843	7.72613	2539.88	2539.88
Cell_05	10	13161.6	13163.9	-6.87424	-17.3811	1.32079	13169.3	0	3.91672	13162.4	-29.4969	shARL13b_2	VC2843	6.87424	8620.22	8620.22
Cell_05	16	10562.2	10565.4	-7.48518	-14.2554	1.67381	10576.3	0	3.29899	10564.1	-38.4178	shARL13b_2	VC2843	7.48518	8822.89	8822.89
Cell_05	16	18133.6	18135.7	-12.3462	-14.9728	1.05486	18150.5	0	4.40082	18134.3	-74.8712	shARL13b_2	VC2843	12.3462	4167.8	4167.8
Cell_05	17	12123.8	12126.4	-6.39016	-12.5792	0.503098	12136.8	0	5.30132	12125.6	-31.5412	shARL13b_2	VC2843	6.39016	3267.29	3267.29
Cell_05	19	3826	3827.64	-6.14216	-13.6698	1.04381	3835.28	0	4.64353	3826.71	-27.6752	shARL13b_2	VC2843	6.14216	3826	3826
Cell_05	20	7157.36	7158.81	-9.40727	-12.8824	0.496008	7162.29	0	3.04244	7158.14	-10.513	shARL13b_2	VC2843	9.40727	28.62	28.62
Cell_05	21	10198.5	10201.6	-9.6272	-11.4786	0.468902	10208.4	0	4.00073	10201.3	-39.448	shARL13b_2	VC2843	9.6272	2247.8	2247.8
Cell_05	22	17374.7	17377.3	-20.4112	-12.9809	0.97704	17394.6	0	4.22797	17376.4	-112.286	shARL13b_2	VC2843	20.4112	1526.4	1526.4
Cell_05	23	18330.3	18335	-13.763	-13.8371	0.902422	18342	0	5.0702	18333	-67.4154	shARL13b_2	VC2843	13.763	461.6	461.6
Cell_05	24	807.666	808.798	-9.43507	-14.2828	0.583581	816.195	0	3.54675	808.411	-38.2744	shARL13b_2	VC2843	9.43507	807.67	807.666
Cell_05	6	9669.64	9674.58	-9.51872	-17.8612	1.53678	9682.81	0	4.42779	9673	-48.3167	shARL13b_2	VC2843	9.51872	2565.4	2565.4
Cell_05	15	11552.7	11558.1	-11.6967	-15.0669	1.87182	11568.5	0	5.13057	11556.6	-58.1639	shARL13b_2	VC2843	11.6967	11552.7	11552.7
Cell_05	19	10117.6	10119.7	-11.979	-14.6506	0.65636	10131.4	0	4.14177	10118.3	-66.6176	shARL13b_2	VC2843	11.979	3448.04	3448.04
Cell_06	1	3273.33	3277.38	-17.6764	-55.8888	1.00413	3287.94	0	5.77839	3276.47	-99.1067	shARL13b_2	VC2843	17.6764	632.18	632.18
Cell_06	1	6246.26	6251.24	-7.68583	-57.1883	0.719343	6265.17	0	3.57099	6250.12	-43.3997	shARL13b_2	VC2843	7.68583	805.59	805.59
Cell_06	1	10218.9	10221.2	-11.6578	-55.9689	0.575298	10231	0	2.98747	10220.3	-46.2658	shARL13b_2	VC2843	11.6578	3972.64	3972.64
Cell_06	2	3362.51	3366.96	-7.91364	-49.6119	2.12988	3374.56	0	5.16795	3365.21	-32.6502	shARL13b_2	VC2843	7.91364	751.48	751.48
Cell_06	2	8644.43	8647.64	-10.1374	-49.2864	2.36798	8660.42	0	6.50079	8645.21	-74.4645	shARL13b_2	VC2843	10.1374	4299.03	4299.03
Cell_06	3	9531.57	9534.82	-12.7228	-48.7701	2.15693	9547.39	0	3.15169	9532.91	-66.6691	shARL13b_2	VC2843	12.7228	3754.48	3754.48
Cell_06	3	10906	10908.3	-7.85531	-47.7902	1.73044	10922.9	0	4.07314	10907	-35.2379	shARL13b_2	VC2843	7.85531	835.3	835.3
Cell_06	3	12308.7	12310.5	-8.79958	-47.1633	1.12467	12319.5	0	3.27792	12309.5	-32.833	shARL13b_2	VC2843	8.79958	1402.7	1402.7
Cell_06	3	12520.7	12523.5	-10.821	-46.3323	0.448701	12530.9	0	4.58808	12522.7	-44.9433	shARL13b_2	VC2843	10.821	212	212
Cell_06	4	1353.91	1356.66	-8.86949	-45.3966	1.36669	1368.84	0	5.26949	1356.32	-54.1889	shARL13b_2	VC2843	8.86949	1353.91	1353.91
Cell_06	4	11507.7	11509.9	-7.0503	-43.5841	1.98771	11526.2	0	4.94916	11508.5	-53.5633	shARL13b_2	VC2843	7.0503	10153.8	10153.8
Cell_06	4	15245.5	15248.6	-13.8028	-42.2641	0.71695	15263.4	0	7.17611	15246.3	-120.817	shARL13b_2	VC2843	13.8028	722	722
Cell_06	5	16606.7	16611	-18.8245	-40.8125	1.03092	16625.8	0	7.32726	16607.9	-160.977	shARL13b_2	VC2843	18.8245	8449.41	8449.41
Cell_06	6	9115.68	9117.92	-9.1953	-37.6914	1.60938	9126.89	0	5.2715	9116.7	-45.0335	shARL13b_2	VC2843	9.1953	9115.68	9115.68
Cell_06	6	10070.8	10076.1	-7.65955	-38.8492	2.67079	10084.3	0	9.56108	10073.2	-54.5381	shARL13b_2	VC2843	7.65955	955.12	955.12
Cell_06	6	10275.3	10279.8	-14.2849	-38.3151	1.30497	10292.7	0	6.24648	10276.4	-92.9387	shARL13b_2	VC2843	14.2849	204.5	204.5
Cell_06	6	11803.5	11807.6	-10.5715	-37.0051	2.40443	11825.6	0	9.61308	11805.1	-90.233	shARL13b_2	VC2843	10.5715	370.7	370.7
Cell_06	7	8078.12	8080.38	-15.7511	-38.7287	1.05373	8096.49	0	4.80253	8079.24	-96.8515	shARL13b_2	VC2843	15.7511	8078.12	8078.12
Cell_06	7	9374.55	9376.66	-11.4625	-37.6034	1.36985	9389.64	0	5.77603	9375.44	-68.6486	shARL13b_2	VC2843	11.4625	605.13	605.13
Cell_06	7	18480.3	18482.4	-7.71171	-38.9678	0.46956	18490.6	0	4.96007	18480.7	-44.4548	shARL13b_2	VC2843	7.71171	940	940
Cell_06	8	14310.9	14314.2	-10.5076	-36.0189	0.876284	14325.1	0	6.00386	14313.1	-62.0106	shARL13b_2	VC2843	10.5076	6656.26	6656.26
Cell_06	9	7499.83	7503.72	-8.31739	-37.5748	1.71517	7514.62	0	6.2311	7500.91	-56.7577	shARL13b_2	VC2843	8.31739	2538.16	2538.16
Cell_06	9	17755.7	17757.4	-7.87332	-37.2194	1.09128	17769.3	0	3.15867	17756.5	-43.3881	shARL13b_2	VC2843	7.87332	2314.8	2314.8
Cell_01	1	5442.39	5443.64	-8.33828	-42.3631	0.445721	5448.98	0	1.51657	5443.33	-19.4464	CTL	VC2845	8.33828	252.12	252.12
Cell_01	1	14504.6	14505.6	-21.6916	-44.9153	0.445284	14510.6	0	1.71947	14505.3	-45.5409	CTL	VC2845	21.6916	750.5	750.5
Cell_01	2	771.442	775.406	-30.8867	-46.9145	1.28648	795.84	0	5.42357	773.872	-259.367	CTL	VC2845	30.8867	195.92	195.918
Cell_01	2	15359	15360	-24.0509	-47.9632	0.447996	15365	0	1.39792	15359.5	-44.3587	CTL	VC2845	24.0509	664.9	664.9
Cell_01	3	4648.84	4650.44	-13.9841	-49.1261	0.618365	4653.54	0	1.80515	4650.07	-20.4816	CTL	VC2845	13.9841	24.92	24.92
Cell_01	4	3365.57	3368.16	-11.6605	-51.7548	1.14535	3373.86	0	3.26899	3366.96	-38.5226	CTL	VC2845	11.6605	3365.57	3365.57
Cell_01	4	18544	18548.4	-17.8695	-50.5931	0.525696	18556.9	0	2.0331	18547.8	-50.8006	CTL	VC2845	17.8695	2857.7	2857.7
Cell_01	5	9597.24	9598.6	-16.6969	-52.1812	0.843182	9605.74	0	2.70543	9598.03	-54.231	CTL	VC2845	16.6969	2213.17	2213.17
Cell_01	6	3040.27	3042.44	-13.7067	-51.9609	0.899335	3048.13	0	2.6723	3041.93	-42.168	CTL	VC2845	13.7067	3040.27	3040.27
Cell_01	6	12422.1	12426.9	-11.1356	-52.0724	0.570609	12436.7	0	3.83948	12426.3	-42.9393	CTL	VC2845	11.1356	1843.9	1843.9
Cell_01	6	17159	17160.3	-10.5199	-52.8953	0.789879	17166.6	0	2.42867	17159.9	-26.036	CTL	VC2845	10.5199	1575.5	1575.5
Cell_01	6	18956.9	18961.7	-15.4411	-52.3872	1.08037	18967.8	0	2.49379	18960.9	-45.4121	CTL	VC2845	15.4411	761.4	761.4
Cell_01	6	19409.2	19413.7	-22.7564	-52.7863	0.44502	19419.9	0	2.21359	19413.4	-61.7739	CTL	VC2845	22.7564	452.3	452.3
Cell_01	7	3917.89	3919.62	-6.24939	-54.4927	0.855572	3923.21	0	1.93525	3918.73	-15.8808	CTL	VC2845	6.24939	776.83	776.83
Cell_01	7	10395.8	10397	-13.0198	-53.8566	0.724948	10401.9	0	2.57904	10396.5	-40.2977	CTL	VC2845	13.0198	3699.07	3699.07
Cell_01	7	16926.2	16927	-9.56269	-53.6085	0.359351	16933.4	0	3.38984	16926.8	-31.4435	CTL	VC2845	9.56269	1451	1451
Cell_01	7	18917.7	18918.7	-9.65419	-53.7608	0.401879	18920.8	0	1.65597	18918.3	-14.0733	CTL	VC2845	9.65419	461.3	461.3
Cell_01	8	3555.64	3556.91	-8.34361	-54.174	0.488769	3561.28	0	2.55186	3556.51	-17.743	CTL	VC2845	8.34361	155.44	155.44
Cell_01	8	7807.39	7808.65	-10.6403	-53.4036	0.623893	7815.29	0	2.76918	7808.21	-28.4095	CTL	VC2845	10.6403	626.18	626.18
Cell_01	8	13287.7	13288.5	-7.44084	-54.6255	0.407174	13292.8	0	2.66101	13288.2	-18.4985	CTL	VC2845	7.44084	983.2	983.2
Cell_01	8	17417.8	17418.8	-12.5198	-56.5897	0.653039	17426.1	0	2.45129	17418.4	-42.8966	CTL	VC2845	12.5198	1047.7	1047.7
Cell_01	9	900.219	901.175	-5.68415	-59.44	0.467265	903.897	0	2.27466	900.88	-13.0972	CTL	VC2845	5.68415	900.22	900.219
Cell_01	9	15694.6	15695.5	-11.8075	-57.2718	0.441226	15699	0	1.75209	15695.2	-22.8477	CTL	VC2845	11.8075	9950.24	9950.24
Cell_02	1	3304.95	3305.77	-9.69613	-15.4565	0.426618	3309.74	0	1.28556	3305.56	-20.4861	CTL	VC2845	9.69613	3304.95	3304.95
Cell_02	1	4807.37	4808.6	-11.1854	-14.4556	0.429682	4817.77	0	2.08487	4808.18	-39.5896	CTL	VC2845	11.1854	1502.42	1502.42
Cell_02	1	11247.2	11249.2	-7.50679	-11.7495	0.505231	11257	0	2.35942	11248.7	-21.9406	CTL	VC2845	7.50679	6439.83	6439.83
Cell_02	2	13478.9	13482.2	-6.03976	-7.92498	0.710738	13491.9	0	5.29932	13481.1	-34.5172	CTL	VC2845	6.03976	2231.7	2231.7
Cell_02	2	15404.6	15405.9	-6.29829	-7.5502	0.576651	15416.9	0	4.47254	15405.6	-35.4651	CTL	VC2845	6.29829	1925.7	1925.7
Cell_02	2	18798	18803.3	-5.73742	-7.60464	0.807287	18807.3	0	5.2407	18801.5	-24.8252	CTL	VC2845	5.73742	3393.4	3393.4
Cell_02	3	1688.71	1690.58	-11.6339	-6.23099	0.405546	1696.35	0	3.13431	1690.3	-37.9489	CTL	VC2845	11.6339	1688.71	1688.71
Cell_02	3	2062.95	2067.28	-9.00805	-5.68923	1.45501	2075.22	0	5.23712	2065.94	-46.4925	CTL	VC2845	9.00805	374.24	374.24
Cell_02	3	7432.28	7436.74	-7.73221	-5.6832	1.45174	7445.43	0	5.42733	7435.43	-42.2524	CTL	VC2845	7.73221	5369.33	5369.33
Cell_02	3	9070.5	9072.33	-22.1893	-6.02717	0.71432	9081.89	0	3.42794	9071.19	-86.7335	CTL	VC2845	22.1893	1638.22	1638.22
Cell_02	3	18030.9	18034.3	-5.28553	-5.41996	0.938229	18038	0	3.08703	18032.7	-18.9282	CTL	VC2845	5.28553	8960.4	8960.4
Cell_02	4	4775.02	4776.61	-6.22963	-4.81157	0.894624	4782.56	0	2.90799	4775.78	-21.8675	CTL	VC2845	6.22963	4775.02	4775.02
Cell_02	4	5687.61	5689.58	-7.44011	-5.2063	0.51908	5698.29	0	1.98065	5688.87	-25.0388	CTL	VC2845	7.44011	912.59	912.59
Cell_02	4	13269.4	13271.9	-10.1197	-3.93053	0.998646	13283.6	0	4.52709	13271.3	-61.0962	CTL	VC2845	10.1197	7581.79	7581.79
Cell_02	4	17362.9	17364.3	-7.11428	-4.1889	0.609842	17377.5	0	2.24162	17364	-28.9235	CTL	VC2845	7.11428	4093.5	4093.5
Cell_02	4	17411.7	17414.2	-6.22044	-3.99053	1.43742	17417.9	0	2.25924	17412.8	-15.421	CTL	VC2845	6.22044	48.8	48.8
Cell_02	5	4450.83	4453.89	-7.32281	-4.17009	1.05635	4459.44	0	3.39791	4453.01	-28.8361	CTL	VC2845	7.32281	4450.83	4450.83
Cell_02	5	14887.5	14889.9	-6.52971	-2.92463	1.03763	14897	0	3.07009	14888.2	-30.0187	CTL	VC2845	6.52971	8110.37	8110.37
Cell_02	6	4321.02	4322.32	-8.32984	-3.61999	0.981703	4332.91	0	3.22151	4321.88	-42.7449	CTL	VC2845	8.32984	596.16	596.16
Cell_02	6	6147.51	6148.86	-7.49262	-4.86707	0.74892	6155.25	0	3.31018	6148.22	-27.9863	CTL	VC2845	7.49262	1826.49	1826.49
Cell_02	6	8956.24	8958.36	-12.4721	-4.93532	1.39769	8970.07	0	6.35237	8957.14	-81.7679	CTL	VC2845	12.4721	2808.73	2808.73
Cell_02	6	11680.4	11684.1	-6.45052	-5.14601	0.849142	11690.9	0	4.51227	11683.3	-31.1175	CTL	VC2845	6.45052	2724.16	2724.16
Cell_02	6	12546.7	12549.3	-9.91689	-5.52475	1.88755	12560.2	0	3.67394	12548.5	-58.4149	CTL	VC2845	9.91689	866.3	866.3
Cell_13	1	2809.83	2810.7	-8.86795	-23.9259	0.608013	2827.14	0	1.98668	2810.41	-46.8062	CTL	VC2845	8.86795	2809.83	2809.83
Cell_13	1	10038.1	10041.5	-15.1946	-25.2043	0.683798	10058.5	0	2.74098	10040.9	-77.7285	CTL	VC2845	15.1946	4156.12	4156.12
Cell_13	2	11944.7	11947	-8.13584	-23.3643	0.505744	11953	0	4.03223	11946.5	-29.6947	CTL	VC2845	8.13584	11944.7	11944.7
Cell_13	4	3025.4	3031.24	-15.0443	-24.5552	0.628694	3043.43	0	5.68178	3029.9	-84.6087	CTL	VC2845	15.0443	3025.4	3025.4
Cell_13	4	7527.4	7528.52	-7.87042	-22.7385	0.704835	7537.47	0	3.87279	7528.04	-32.4579	CTL	VC2845	7.87042	2933.19	2933.19
Cell_13	4	13284.4	13286.9	-8.80772	-23.9313	0.871269	13302.5	0	2.9568	13286.2	-44.6614	CTL	VC2845	8.80772	705	705
Cell_13	5	14353.9	14356.6	-9.1495	-23.0402	2.18312	14368.6	0	4.24063	14354.5	-49.8104	CTL	VC2845	9.1495	12082.2	12082.2
Cell_13	6	3443.66	3445.14	-8.45964	-22.8451	1.2065	3452.12	0	2.74728	3444.58	-26.2382	CTL	VC2845	8.45964	3443.66	3443.66
Cell_13	6	13764.1	13765.6	-7.5569	-26.2687	1.14615	13771.5	0	2.49664	13765.2	-23.5492	CTL	VC2845	7.5569	3336.4	3336.4
Cell_13	6	19720.4	19723.1	-10.5506	-26.9735	0.857361	19734.6	0	3.08496	19721.8	-54.8887	CTL	VC2845	10.5506	1225	1225
Cell_13	7	5962.55	5968.51	-6.28003	-26.3976	2.48366	5973.66	0	3.46317	5965.95	-28.2784	CTL	VC2845	6.28003	560.38	560.38
Cell_13	8	2179.44	2180.45	-6.43639	-26.2356	0.594293	2187.78	0	3.10054	2180.01	-30.8136	CTL	VC2845	6.43639	2179.44	2179.44
Cell_13	8	8545.02	8547.06	-7.77729	-25.3708	0.450731	8556.65	0	6.61873	8545.62	-48.0771	CTL	VC2845	7.77729	258.04	258.04
Cell_13	8	13408	13409.2	-6.434	-26.3113	0.419977	13414.3	0	3.22456	13408.8	-22.0203	CTL	VC2845	6.434	4862.98	4862.98
Cell_13	9	16102.5	16106.6	-8.33175	-27.9714	2.23462	16119.5	0	3.93113	16103.8	-51.6467	CTL	VC2845	8.33175	12290	12290
Cell_13	9	19836.1	19837	-11.4291	-26.6138	0.55469	19847	0	3.58185	19836.7	-50.3289	CTL	VC2845	11.4291	648	648
Cell_13	11	9200.76	9203.5	-7.16574	-26.5745	1.17121	9207.87	0	3.70936	9201.28	-30.5226	CTL	VC2845	7.16574	2675.31	2675.31
Cell_13	11	11928.4	11929	-6.51212	-25.1161	0.313827	11939.1	0	3.02584	11928.9	-25.3819	CTL	VC2845	6.51212	1405.3	1405.3
Cell_13	12	3999.96	4001.6	-15.3089	-24.0644	0.518444	4012.78	0	5.13502	4001.18	-79.7951	CTL	VC2845	15.3089	487.05	487.05
Cell_13	12	17769.3	17773.2	-8.17469	-24.2593	0.460911	17782	0	5.3755	17772.6	-42.8878	CTL	VC2845	8.17469	7970.6	7970.6
Cell_13	13	14038.7	14043.5	-17.2261	-21.7813	0.733782	14061.7	0	5.60599	14042.7	-100.508	CTL	VC2845	17.2261	279.7	279.7
Cell_13	13	19969.6	19973.2	-7.50923	-22.0192	1.8175	19983.9	0	6.30079	19972.1	-51.6327	CTL	VC2845	7.50923	2468.4	2468.4
Cell_13	14	8173.36	8176.56	-7.25617	-23.3469	0.481548	8183.69	0	2.94952	8175.69	-20.8324	CTL	VC2845	7.25617	1847.73	1847.73
Cell_15	1	2195.09	2196.25	-8.85858	-64.3347	0.585469	2205.56	0	2.6432	2195.73	-38.7752	shARL13b_1	VC2845	8.85858	1140.11	1140.11
Cell_15	1	14438.8	14442	-14.0686	-60.9553	2.42307	14451.2	0	4.16412	14439.6	-68.482	shARL13b_1	VC2845	14.0686	53.2	53.2
Cell_15	1	18641.3	18643.1	-10.4211	-59.2137	0.684854	18650.1	0	3.56122	18642.2	-43.0825	shARL13b_1	VC2845	10.4211	587.4	587.4
Cell_15	2	11696.3	11697.9	-7.25055	-53.1129	1.11146	11704.9	0	2.97237	11697.4	-29.8591	shARL13b_1	VC2845	7.25055	4012.19	4012.19
Cell_15	3	905.578	907.973	-13.4711	-49.7488	1.44631	918.22	0	4.74553	906.635	-65.6151	shARL13b_1	VC2845	13.4711	905.58	905.578
Cell_15	3	6292.44	6294.23	-7.85873	-49.6543	1.29258	6299.27	0	2.9828	6293.14	-21.8384	shARL13b_1	VC2845	7.85873	13.98	13.98
Cell_15	3	8394.72	8396.5	-8.29993	-50.3424	0.41156	8411.8	0	2.62154	8395.34	-54.4707	shARL13b_1	VC2845	8.29993	414.47	414.47
Cell_15	3	15527.9	15530.9	-10.1625	-47.3814	1.55729	15542.3	0	6.11273	15529	-74.8203	shARL13b_1	VC2845	10.1625	780.7	780.7
Cell_15	4	4750.09	4754.81	-7.42986	-43.6931	2.57631	4762.56	0	5.40392	4752.32	-41.6106	shARL13b_1	VC2845	7.42986	1713.11	1713.11
Cell_15	4	11005	11006.2	-14.0091	-42.9305	0.510246	11019.6	0	3.78624	11005.7	-65.2942	shARL13b_1	VC2845	14.0091	140.1	140.1
Cell_15	4	18209.5	18213	-6.60949	-41.0651	2.38209	18223.9	0	5.50143	18210.9	-36.0634	shARL13b_1	VC2845	6.60949	1183.9	1183.9
Cell_15	5	10870.7	10872.3	-9.45435	-38.5249	1.07204	10883.3	0	3.60096	10871.2	-47.1636	shARL13b_1	VC2845	9.45435	259.3	259.3
Cell_15	5	19424	19425.1	-6.47002	-36.334	0.63112	19428.9	0	2.54548	19424.7	-17.0897	shARL13b_1	VC2845	6.47002	3220.9	3220.9
Cell_15	6	11572	11573.5	-14.3492	-33.0989	0.460069	11586.4	0	3.63284	11572.7	-82.4989	shARL13b_1	VC2845	14.3492	4976.81	4976.81
Cell_15	6	16977.8	16980.2	-9.33402	-32.2432	1.7174	16991.7	0	4.49852	16978.5	-46.1368	shARL13b_1	VC2845	9.33402	1281.2	1281.2
Cell_15	7	1915.55	1918.52	-19.9436	-30.703	0.755999	1930	0	4.85299	1916.37	-117.377	shARL13b_1	VC2845	19.9436	528.29	528.29
Cell_15	7	3230.43	3232.39	-8.48872	-31.0009	1.13975	3238.88	0	4.17374	3231.31	-32.2293	shARL13b_1	VC2845	8.48872	1314.88	1314.88
Cell_15	7	10170.6	10172.5	-10.5009	-30.4838	0.557347	10185.8	0	5.39323	10172	-65.277	shARL13b_1	VC2845	10.5009	2341.47	2341.47
Cell_15	8	5859.66	5860.93	-6.12918	-26.793	0.643487	5872.31	0	3.85067	5860.63	-30.83	shARL13b_1	VC2845	6.12918	883.43	883.43
Cell_15	9	2960.47	2964.06	-6.74303	-25.0499	1.91719	2972.53	0	4.41436	2963.08	-27.5307	shARL13b_1	VC2845	6.74303	576.86	576.86
Cell_15	9	13640	13641.6	-7.07904	-24.6713	1.21225	13654.5	0	2.74934	13641	-44.2796	shARL13b_1	VC2845	7.07904	632.1	632.1
Cell_15	10	6215.24	6216.85	-8.41482	-23.2926	0.542196	6240.18	0	5.19354	6215.85	-77.419	shARL13b_1	VC2845	8.41482	1047.34	1047.34
Cell_15	10	14400.6	14403.2	-16.0711	-23.1191	1.2288	14412.7	0	4.17099	14401.7	-70.9321	shARL13b_1	VC2845	16.0711	335.3	335.3
Cell_07	1	8038.02	8038.79	-8.70409	-47.3077	0.453398	8041.93	0	1.44815	8038.56	-14.9087	shARL13b_2	VC2845	8.70409	2962.08	2962.08
Cell_07	1	15905.5	15909.2	-8.62184	-42.855	1.8729	15917	0	2.48267	15907.9	-25.9414	shARL13b_2	VC2845	8.62184	968.6	968.6
Cell_07	3	17764.5	17765.8	-13.4271	-26.587	0.687119	17775.3	0	2.07167	17765.3	-44.5788	shARL13b_2	VC2845	13.4271	7408.5	7408.5
Cell_07	4	10662.4	10663.1	-7.6258	-24.045	0.513114	10670.7	0	1.84119	10662.8	-22.7825	shARL13b_2	VC2845	7.6258	3940.59	3940.59
Cell_07	5	660.219	662.234	-9.69988	-22.7334	1.34222	671.509	0	2.8601	661.724	-33.8618	shARL13b_2	VC2845	9.69988	660.22	660.219
Cell_07	5	10860.5	10862.1	-18.1335	-20.7638	0.56212	10870.2	0	3.65208	10861.5	-63.374	shARL13b_2	VC2845	18.1335	3327.45	3327.45
Cell_07	6	9344.47	9347.26	-7.79144	-20.5227	1.57081	9358.97	0	4.13153	9345.26	-47.8832	shARL13b_2	VC2845	7.79144	2414.48	2414.48
Cell_07	7	5451.53	5453.44	-19.715	-16.8267	0.474355	5462.97	0	2.50689	5452.78	-65.0224	shARL13b_2	VC2845	19.715	5451.53	5451.53
Cell_07	7	12445.5	12446.3	-12.398	-16.7707	0.352599	12457.5	0	3.12072	12446.1	-56.7528	shARL13b_2	VC2845	12.398	2203.8	2203.8
Cell_07	8	3453.15	3454.34	-7.79868	-16.5902	0.646069	3461.33	0	1.90286	3453.83	-24.6275	shARL13b_2	VC2845	7.79868	2306.57	2306.57
Cell_07	9	1814.93	1816.75	-12.0235	-13.6964	0.603425	1828.04	0	2.74557	1815.85	-43.9554	shARL13b_2	VC2845	12.0235	1814.93	1814.93
Cell_07	9	19456.9	19457.9	-11.1187	-12.6239	0.459724	19462.5	0	2.4	19457.6	-31.2502	shARL13b_2	VC2845	11.1187	4928.5	4928.5
Cell_07	11	17064.7	17066.5	-8.18051	-7.7064	0.741153	17074.8	0	4.5949	17065.3	-32.7159	shARL13b_2	VC2845	8.18051	1516.8	1516.8
Cell_07	12	1154.85	1156.71	-9.63426	-7.74808	0.603289	1161.9	0	1.52462	1156.15	-25.9729	shARL13b_2	VC2845	9.63426	1154.85	1154.85
Cell_07	12	4903.31	4906.57	-10.1146	-6.87083	0.909482	4929.15	0	5.09804	4905.42	-90.689	shARL13b_2	VC2845	10.1146	853.19	853.19
Cell_07	13	1246.5	1250.09	-15.7329	-7.5521	1.82405	1260.04	0	4.57031	1248.55	-90.1411	shARL13b_2	VC2845	15.7329	589.81	589.811
Cell_07	13	12300.1	12303.7	-9.18337	-6.23407	1.33839	12310.9	0	2.49522	12303.2	-29.262	shARL13b_2	VC2845	9.18337	561.4	561.4
Cell_07	14	9919.48	9921.72	-11.0244	-7.03585	1.29253	9926.78	0	1.82953	9920.96	-28.3175	shARL13b_2	VC2845	11.0244	5119.98	5119.98
Cell_07	15	2242.52	2243.44	-11.3749	-5.58629	0.416289	2254.37	0	1.78826	2243.2	-41.1847	shARL13b_2	VC2845	11.3749	336.21	336.21
Cell_07	15	17943.7	17944.5	-9.56213	-6.19057	0.46263	17947.9	0	1.95648	17944.3	-19.1528	shARL13b_2	VC2845	9.56213	2796.8	2796.8
Cell_07	16	7235.7	7236.79	-10.9661	-6.1358	0.652111	7245.28	0	2.52449	7236.43	-34.8728	shARL13b_2	VC2845	10.9661	7235.7	7235.7
Cell_07	16	8693.09	8694.23	-12.8172	-6.39624	0.524951	8701.11	0	2.49137	8693.68	-41.0239	shARL13b_2	VC2845	12.8172	501.42	501.42
Cell_07	12	15933	15934.6	-9.45417	-7.70853	0.430239	15941.8	0	2.18127	15934.4	-30.5723	shARL13b_2	VC2845	9.45417	3370.9	3370.9
Cell_09	1	4930.65	4932.17	-25.2588	-20.4932	0.625944	4948.76	0	3.72606	4931.32	-133.968	shARL13b_2	VC2845	25.2588	4930.65	4930.65
Cell_09	1	4986.97	4989.35	-7.09827	-21.6002	1.61169	4996.73	0	3.78477	4988.24	-30.4974	shARL13b_2	VC2845	7.09827	56.32	56.32
Cell_09	1	12598.7	12601.4	-9.96641	-20.0196	0.953072	12608.8	0	3.83547	12600.7	-40.7937	shARL13b_2	VC2845	9.96641	7611.73	7611.73
Cell_09	1	14669.5	14670.1	-7.30426	-18.4585	0.328548	14681.5	0	1.36462	14670.1	-27.597	shARL13b_2	VC2845	7.30426	2070.8	2070.8
Cell_09	2	4332.7	4337.32	-7.62368	-17.1199	2.49846	4347.5	0	4.22415	4334.45	-44.7003	shARL13b_2	VC2845	7.62368	2311.46	2311.46
Cell_09	2	8180.7	8183.35	-9.70891	-17.9519	1.36422	8190.92	0	3.64132	8181.96	-40.6297	shARL13b_2	VC2845	9.70891	3848	3848
Cell_09	2	10875.9	10879.3	-36.0497	-15.3174	0.64021	10894.9	0	3.60143	10878.5	-159.415	shARL13b_2	VC2845	36.0497	2651.03	2651.03
Cell_09	4	1981.4	1983.7	-6.22437	-14.5884	0.705524	1993.23	0	3.75313	1983.35	-32.8609	shARL13b_2	VC2845	6.22437	1481.35	1481.35
Cell_09	4	7345.89	7347.36	-37.0899	-17.5058	0.468355	7360.15	0	3.46869	7346.83	-175.479	shARL13b_2	VC2845	37.0899	1218.06	1218.06
Cell_09	4	8547.88	8549.26	-11.75	-18.2361	0.82407	8557.17	0	3.04791	8548.63	-43.9768	shARL13b_2	VC2845	11.75	1201.99	1201.99
Cell_09	4	12296.3	12298.3	-22.0244	-13.1807	0.824639	12309.7	0	4.71481	12297.4	-109.592	shARL13b_2	VC2845	22.0244	3748.42	3748.42
Cell_09	4	14624	14625.9	-6.87408	-13.2613	1.32198	14630.6	0	2.23164	14624.9	-22.3998	shARL13b_2	VC2845	6.87408	2327.7	2327.7
Cell_09	5	5389.98	5394.05	-7.79125	-13.4427	1.02716	5404.03	0	3.21825	5392.46	-37.831	shARL13b_2	VC2845	7.79125	2499.9	2499.9
Cell_09	5	12968.4	12969.4	-8.66972	-13.3146	0.499074	12984	0	4.34114	12969	-51.9995	shARL13b_2	VC2845	8.66972	4896.16	4896.16
Cell_09	5	13901.4	13902.9	-29.0604	-11.5033	0.491249	13916.1	0	3.76082	13902.5	-138.848	shARL13b_2	VC2845	29.0604	710.4	710.4
Cell_09	5	19407	19410.5	-7.8605	-12.8972	1.19461	19417.3	0	3.44047	19409.7	-33.1887	shARL13b_2	VC2845	7.8605	4918.4	4918.4
Cell_09	5	19538.6	19540.5	-10.8349	-13.2433	0.38643	19547.9	0	2.98971	19539.1	-41.0753	shARL13b_2	VC2845	10.8349	131.6	131.6
Cell_09	6	11330.3	11332.8	-6.32174	-11.671	0.653969	11339.5	0	3.25671	11331.5	-28.2323	shARL13b_2	VC2845	6.32174	2733	2733
Cell_09	6	16987.3	16988.8	-7.31709	-13.3368	1.15047	16996.9	0	2.97706	16988.3	-28.2968	shARL13b_2	VC2845	7.31709	5657	5657
Cell_09	6	18274.2	18276.2	-10.3854	-12.4415	1.12535	18281.4	0	4.3306	18275.3	-39.4993	shARL13b_2	VC2845	10.3854	505.6	505.6
Cell_09	6	19229.2	19230.8	-6.36635	-11.9319	0.834736	19233.9	0	2.06018	19229.7	-14.098	shARL13b_2	VC2845	6.36635	955	955
Cell_09	7	5605.48	5609.4	-11.3105	-10.6129	2.09739	5618.41	0	3.72827	5607.4	-48.3538	shARL13b_2	VC2845	11.3105	1864.72	1864.72
Cell_09	7	6239.12	6241.84	-9.655	-11.4141	1.59184	6248.07	0	3.36323	6240.45	-34.8746	shARL13b_2	VC2845	9.655	633.64	633.64
Cell_10	13	3821.88	3825.04	-9.51216	-3.68343	1.75997	3832.95	0	2.64254	3823.79	-37.3572	shARL13b_2	VC2845	9.51216	3821.88	3821.88
Cell_10	13	7549.52	7550.51	-11.3278	-5.56633	0.503725	7562.79	0	3.08774	7550.03	-46.3384	shARL13b_2	VC2845	11.3278	2687.84	2687.84
Cell_10	13	18946.1	18948.7	-7.34152	-5.01159	1.52609	18959.1	0	5.83053	18946.8	-38.477	shARL13b_2	VC2845	7.34152	617.4	617.4
Cell_10	14	3707.09	3708.47	-28.7244	-5.80315	0.555989	3717.85	0	2.67603	3707.97	-94.6163	shARL13b_2	VC2845	28.7244	3707.09	3707.09
Cell_10	14	19169.5	19171.4	-11.8662	-5.20536	0.51192	19175.7	0	2.41987	19170.2	-37.3084	shARL13b_2	VC2845	11.8662	6417.3	6417.3
Cell_10	15	6371.99	6373.01	-7.63366	-3.88359	0.578012	6380.62	0	1.33981	6372.58	-21.2595	shARL13b_2	VC2845	7.63366	4817.16	4817.16
Cell_10	15	6586.88	6589.15	-11.7446	-3.57513	0.814412	6598.25	0	3.83696	6588.4	-52.7327	shARL13b_2	VC2845	11.7446	214.89	214.89
Cell_10	15	7596.53	7600.3	-9.77164	-3.68622	0.685977	7605.07	0	1.8875	7599.9	-20.1224	shARL13b_2	VC2845	9.77164	1009.65	1009.65
Cell_10	15	16232.8	16235.7	-9.9203	-4.1666	2.35563	16241.2	0	3.25139	16233.7	-38.3838	shARL13b_2	VC2845	9.9203	4483.1	4483.1
Cell_10	15	16860	16861	-8.89156	-3.72417	0.736658	16867.7	0	3.2098	16860.6	-34.8487	shARL13b_2	VC2845	8.89156	627.2	627.2
Cell_10	15	18034	18036.1	-10.4194	-3.0322	0.418776	18039.8	0	1.93352	18035.6	-19.4028	shARL13b_2	VC2845	10.4194	1174	1174
Cell_10	16	768.863	770.207	-7.4068	-2.84637	0.996945	773.636	0	1.85401	769.654	-15.9797	shARL13b_2	VC2845	7.4068	768.86	768.863
Cell_10	16	15306.6	15307.6	-16.7709	-3.98122	0.466716	15319.5	0	2.28247	15307.1	-57.8378	shARL13b_2	VC2845	16.7709	14537.7	14537.7
Cell_10	16	15407.4	15408.3	-9.66781	-2.47787	0.559009	15436.6	0	2.26401	15408.1	-69.9612	shARL13b_2	VC2845	9.66781	100.8	100.8
Cell_10	16	16409.3	16411.1	-12.8212	-2.36363	0.442687	16419.2	0	3.27055	16410.8	-36.2527	shARL13b_2	VC2845	12.8212	1001.9	1001.9
Cell_10	17	7202.17	7204.4	-9.81276	-3.21148	1.26789	7213.98	0	1.8196	7203.43	-39.8255	shARL13b_2	VC2845	9.81276	2343.2	2343.2
Cell_10	17	11823.8	11825.4	-7.3617	-3.84409	0.57605	11830.3	0	2.28509	11824.5	-22.7402	shARL13b_2	VC2845	7.3617	1860.91	1860.91
Cell_10	17	15608.2	15609.9	-9.38738	-4.97419	0.438192	15613.5	0	2.51287	15609.3	-21.2449	shARL13b_2	VC2845	9.38738	349.1	349.1
Cell_10	18	6151.56	6153.46	-9.0945	-3.09402	0.496104	6158.64	0	2.12115	6153.14	-19.1734	shARL13b_2	VC2845	9.0945	5373.92	5373.92
Cell_10	18	10792.1	10793.5	-23.2025	-4.90371	0.672417	10798	0	2.53432	10792.7	-62.5581	shARL13b_2	VC2845	23.2025	2868.13	2868.13
Cell_10	18	16196.5	16197.3	-12.9655	-1.94523	0.398438	16205	0	1.79431	16197	-34.601	shARL13b_2	VC2845	12.9655	4012.1	4012.1
Cell_10	13	18328.7	18331.4	-8.55773	-4.23521	1.43258	18340.6	0	5.09863	18330.1	-42.1075	shARL13b_2	VC2845	8.55773	453.8	453.8
Cell_10	14	7605.91	7607.5	-7.81599	-5.41021	0.921405	7611.17	0	2.3873	7606.35	-19.0689	shARL13b_2	VC2845	7.81599	1151.45	1151.45
Cell_11	1	1729.18	1730.77	-6.75667	-22.8082	0.965395	1741.93	0	2.21648	1729.71	-31.9533	shARL13b_2	VC2845	6.75667	1729.18	1729.18
Cell_11	1	13616.1	13618	-19.2717	-20.1321	0.90143	13638.4	0	4.68848	13617	-123.613	shARL13b_2	VC2845	19.2717	1241.5	1241.5
Cell_11	2	2354.25	2356.81	-21.1026	-17.4102	1.10722	2371.06	0	4.86088	2356.13	-122.515	shARL13b_2	VC2845	21.1026	608.62	608.62
Cell_11	3	3435.01	3438.74	-11.2208	-12.7533	0.982794	3453.3	0	5.82866	3437.85	-71.1131	shARL13b_2	VC2845	11.2208	3435.01	3435.01
Cell_11	3	9933.53	9940.31	-6.90748	-11.195	2.23916	9945.95	0	4.62413	9937.73	-33.8977	shARL13b_2	VC2845	6.90748	1852.67	1852.67
Cell_11	4	2302.79	2305.62	-7.90187	-10.3354	1.28759	2325	0	3.95469	2304.78	-67.9575	shARL13b_2	VC2845	7.90187	2302.79	2302.79
Cell_11	5	984.763	986.553	-13.0513	-7.80378	0.55765	997.141	0	3.29746	985.453	-59.3326	shARL13b_2	VC2845	13.0513	984.76	984.763
Cell_11	5	11826.4	11827.8	-13.3675	-6.26744	0.955641	11843.4	0	4.91918	11827.2	-85.2972	shARL13b_2	VC2845	13.3675	2514.05	2514.05
Cell_11	6	4244.79	4246.74	-10.1071	-4.4249	0.55587	4254.19	0	3.59249	4245.83	-43.8442	shARL13b_2	VC2845	10.1071	323.53	323.53
Cell_11	6	15923.3	15927.2	-15.2484	-2.11	0.563716	15937.9	0	3.69383	15925.8	-73.1953	shARL13b_2	VC2845	15.2484	252.8	252.8
Cell_11	7	3748.7	3750.66	-7.14312	-1.43808	1.28851	3764.64	0	2.7742	3749.58	-46.2807	shARL13b_2	VC2845	7.14312	3748.7	3748.7
Cell_11	7	6477.62	6479.78	-11.3583	-1.04404	0.396607	6489.05	0	3.89495	6479.37	-51.1121	shARL13b_2	VC2845	11.3583	2728.92	2728.92
Cell_11	7	16234.1	16237.5	-8.32187	0.967128	0.9775	16247.1	0	4.7006	16236.7	-37.5235	shARL13b_2	VC2845	8.32187	5681	5681
Cell_11	7	19149.5	19153.2	-7.03771	0.836658	2.0585	19159.4	0	4.05482	19150.8	-29.5608	shARL13b_2	VC2845	7.03771	2915.4	2915.4
Cell_11	8	18538	18540.4	-7.03881	1.14912	1.32817	18552.3	0	4.68766	18538.7	-45.7848	shARL13b_2	VC2845	7.03881	3224.6	3224.6
Cell_11	9	10064.6	10067.3	-11.2886	3.81204	0.59208	10077.9	0	4.42568	10066.4	-63.9355	shARL13b_2	VC2845	11.2886	2831.07	2831.07
Cell_11	10	2526.33	2528.17	-9.76898	3.89758	0.885596	2538.64	0	4.96612	2526.89	-64.5579	shARL13b_2	VC2845	9.76898	2526.33	2526.33
Cell_11	10	3017.75	3022.44	-12.4922	4.82612	0.43756	3039.96	0	5.12794	3021.2	-87.0096	shARL13b_2	VC2845	12.4922	491.42	491.42
Cell_11	10	14360.9	14364	-12.0626	4.69011	1.02873	14375.8	0	2.62708	14362.7	-51.3704	shARL13b_2	VC2845	12.0626	5060.62	5060.62
Cell_11	11	7450.27	7452.14	-16.9354	6.55377	0.658001	7463.12	0	3.5047	7451.17	-90.0873	shARL13b_2	VC2845	16.9354	5102.75	5102.75
Cell_11	11	8798.86	8801.4	-11.7004	7.1902	0.743451	8811.99	0	3.60904	8800.75	-54.4843	shARL13b_2	VC2845	11.7004	1348.59	1348.59
Cell_11	11	14438.1	14440.8	-6.9291	7.63112	0.889548	14453.4	0	4.57285	14439	-43.5988	shARL13b_2	VC2845	6.9291	305.8	305.8
Cell_11	11	18439.9	18441	-10.3039	6.94086	0.42296	18454.5	0	3.3358	18440.5	-61.0035	shARL13b_2	VC2845	10.3039	161.2	161.2
Cell_12	4	5555.25	5555.81	-11.4314	-11.8278	0.264001	5560.78	0	2.83904	5555.8	-28.4192	shARL13b_2	VC2845	11.4314	2704.39	2704.39
Cell_12	4	16403	16404.3	-21.6311	-12.3097	0.372371	16416.4	0	1.45071	16404	-52.8472	shARL13b_2	VC2845	21.6311	10847.8	10847.8
Cell_12	4	19587.7	19589.1	-11.8529	-11.6332	0.791448	19599.1	0	2.37697	19588.6	-43.2925	shARL13b_2	VC2845	11.8529	1766.1	1766.1
Cell_12	4	19875	19877.8	-12.7373	-11.3773	1.01776	19888.3	0	3.04855	19877.5	-51.2481	shARL13b_2	VC2845	12.7373	287.3	287.3
Cell_12	5	6534.02	6535.97	-8.11648	-9.87055	0.376267	6546.89	0	3.6749	6535.76	-35.7443	shARL13b_2	VC2845	8.11648	1865.02	1865.02
Cell_12	5	12033	12036.6	-9.81653	-10.9168	1.33557	12043.8	0	3.85359	12035.4	-35.6244	shARL13b_2	VC2845	9.81653	5498.98	5498.98
Cell_12	6	3814.34	3817.25	-18.5468	-11.232	0.8672	3827.83	0	3.11025	3816.55	-74.4874	shARL13b_2	VC2845	18.5468	3814.34	3814.34
Cell_12	6	7470.2	7471.33	-7.30207	-12.0397	0.529322	7475.51	0	1.60336	7470.67	-13.1212	shARL13b_2	VC2845	7.30207	3655.86	3655.86
Cell_12	6	14904.3	14905.7	-9.98204	-11.1299	0.66836	14912.5	0	4.19669	14905	-37.2763	shARL13b_2	VC2845	9.98204	3297.5	3297.5
Cell_12	6	15921.2	15922.2	-7.83162	-11.3759	0.680604	15926.6	0	1.53771	15921.9	-16.1999	shARL13b_2	VC2845	7.83162	1016.9	1016.9
Cell_12	6	16669.6	16672.2	-26.3588	-11.9099	1.03583	16680.4	0	3.47256	16671.1	-110.969	shARL13b_2	VC2845	26.3588	748.4	748.4
Cell_12	7	1682.74	1684.38	-6.23949	-12.6751	0.382551	1694.4	0	2.783	1683.32	-34.1905	shARL13b_2	VC2845	6.23949	1682.74	1682.74
Cell_12	7	3181.03	3183.6	-8.28376	-12.3887	1.48204	3188.86	0	4.07517	3182.2	-27.427	shARL13b_2	VC2845	8.28376	1498.29	1498.29
Cell_12	7	4399.29	4401.5	-7.17065	-12.5002	1.56737	4405.64	0	3.32283	4400.03	-24.1945	shARL13b_2	VC2845	7.17065	1218.26	1218.26
Cell_12	7	9381.87	9384.05	-10.3139	-11.9577	1.14875	9392.64	0	3.64393	9383.25	-43.6556	shARL13b_2	VC2845	10.3139	1485.02	1485.02
Cell_12	7	11565.5	11568.3	-6.72581	-11.1632	1.48399	11574.8	0	3.88387	11567.2	-25	shARL13b_2	VC2845	6.72581	1252.7	1252.7
Cell_12	7	17921.5	17924.3	-5.70598	-12.1773	2.2882	17928	0	3.41479	17922	-22.2648	shARL13b_2	VC2845	5.70598	6356	6356
Cell_12	8	5561.45	5563.41	-15.6319	-13.0912	0.671889	5582.4	0	4.00438	5562.84	-93.1889	shARL13b_2	VC2845	15.6319	5561.45	5561.45
Cell_12	9	4190.07	4194.15	-7.66048	-11.5714	2.63884	4204.49	0	4.14802	4190.97	-40.4861	shARL13b_2	VC2845	7.66048	4190.07	4190.07
Cell_12	9	10316.5	10319.4	-15.154	-11.4998	0.930791	10328	0	3.37326	10318.8	-62.2513	shARL13b_2	VC2845	15.154	6126.43	6126.43
Cell_12	9	18731.8	18734.1	-5.20449	-12.7276	1.41532	18738.2	0	3.2821	18732.5	-19.449	shARL13b_2	VC2845	5.20449	8415.3	8415.3
Cell_12	10	2722.02	2728.52	-9.22218	-10.3938	0.850194	2736.58	0	4.7083	2726.27	-42.8229	shARL13b_2	VC2845	9.22218	1727.52	1727.52
Cell_12	10	7354.67	7356.96	-13.1631	-12.3307	1.26599	7362.34	0	3.07281	7355.95	-40.0847	shARL13b_2	VC2845	13.1631	4632.65	4632.65
Cell_05	1	1560.81	1561.81	-6.83572	-30.2798	0.537242	1573.6	0	3.7074	1561.43	-35.5326	CTL	VC2848	6.83572	1560.81	1560.81
Cell_05	1	2090.88	2092.28	-9.76677	-30.7301	1.18569	2102.95	0	5.4639	2091.43	-54.6137	CTL	VC2848	9.76677	358.64	358.64
Cell_05	2	4739.64	4742.61	-7.82506	-24.3156	1.43321	4751.21	0	4.93263	4741.49	-33.034	CTL	VC2848	7.82506	4739.64	4739.64
Cell_05	2	8561.88	8564.46	-14.4144	-24.9835	1.10813	8576.64	0	5.22556	8562.69	-82.7567	CTL	VC2848	14.4144	3822.24	3822.24
Cell_05	3	1273.92	1275.68	-7.8309	-23.138	0.542292	1280.78	0	2.69319	1275.34	-23.821	CTL	VC2848	7.8309	151.86	151.86
Cell_05	3	19620	19625.3	-9.37849	-20.2905	2.44249	19632.8	0	5.12763	19623.4	-41.1014	CTL	VC2848	9.37849	18346.1	18346.1
Cell_05	4	7846	7847.44	-9.71137	-21.3001	0.942097	7859.8	0	4.52541	7846.64	-60.7648	CTL	VC2848	9.71137	7240.5	7240.5
Cell_05	4	17688.1	17690.6	-19.3904	-21.448	0.942974	17703.8	0	5.59839	17689.6	-129.902	CTL	VC2848	19.3904	9842.1	9842.1
Cell_05	4	18506.2	18510.4	-7.07119	-22.1888	0.503549	18520.3	0	6.09938	18508.8	-56.8199	CTL	VC2848	7.07119	818.1	818.1
Cell_05	5	4814.86	4817.4	-8.82646	-20.678	1.43109	4829.14	0	5.90831	4816.33	-51.195	CTL	VC2848	8.82646	4814.86	4814.86
Cell_05	5	19598.1	19601.7	-6.14907	-20.7247	2.53018	19618.7	0	3.63615	19600.5	-38.1951	CTL	VC2848	6.14907	508.7	508.7
Cell_05	6	5294.02	5295.28	-8.92659	-19.351	0.497932	5303.67	0	4.58263	5294.93	-38.2798	CTL	VC2848	8.92659	5294.02	5294.02
Cell_05	7	6602.45	6605.55	-8.90294	-20.2044	2.49977	6618.05	0	3.6372	6603.49	-53.0869	CTL	VC2848	8.90294	1292.75	1292.75
Cell_05	7	10465.8	10467.6	-7.39707	-19.8547	0.757389	10471.5	0	3.17926	10466.4	-24.3577	CTL	VC2848	7.39707	1553.31	1553.31
Cell_05	8	11078	11081.6	-10.8724	-18.9124	1.99879	11102	0	4.99531	11080.4	-71.4579	CTL	VC2848	10.8724	11078	11078
Cell_05	8	12845.1	12848.2	-10.1493	-18.8604	0.84133	12857.3	0	4.25717	12846.6	-48.0615	CTL	VC2848	10.1493	1767.1	1767.1
Cell_05	8	13711.4	13714.6	-15.3778	-19.4791	1.36172	13723.8	0	3.90944	13712.5	-79.0758	CTL	VC2848	15.3778	866.3	866.3
Cell_05	11	5560.19	5563.01	-7.9483	-15.5809	2.21386	5568.28	0	3.27101	5560.79	-23.5317	CTL	VC2848	7.9483	5560.19	5560.19
Cell_05	11	15797.1	15798.2	-6.70463	-15.7866	0.849387	15806.2	0	3.32685	15797.8	-25.7851	CTL	VC2848	6.70463	3564.2	3564.2
Cell_05	11	16157.3	16159.4	-10.7618	-15.7884	1.44802	16171.7	0	4.49765	16158.8	-64.4602	CTL	VC2848	10.7618	360.2	360.2
Cell_05	12	13836.9	13839.9	-8.46856	-14.999	2.46026	13846.2	0	3.06512	13838	-27.9277	CTL	VC2848	8.46856	2225.6	2225.6
Cell_05	14	782.963	785.404	-6.971	-15.6362	1.56812	792.191	0	5.23034	783.783	-33.6862	CTL	VC2848	6.971	782.96	782.963
Cell_05	12	5514.52	5517.42	-8.57149	-15.7266	1.90403	5530.89	0	3.24484	5516.04	-46.8154	CTL	VC2848	8.57149	5514.52	5514.52
Cell_08	1	4200.38	4201.95	-9.96708	-89.4653	1.03415	4211.76	0	4.84946	4201.11	-53.7152	shARL13b_1	VC2848	9.96708	883.14	883.14
Cell_08	1	13052.4	13055.3	-10.2077	-85.6779	0.611603	13064.5	0	3.64791	13053.5	-45.9504	shARL13b_1	VC2848	10.2077	2375	2375
Cell_08	2	2336.25	2338.02	-8.0825	-83.1953	0.531445	2344.09	0	3.49359	2337.17	-32.3462	shARL13b_1	VC2848	8.0825	947.1	947.1
Cell_08	2	11007.7	11009.4	-8.40309	-82.2829	0.584456	11015.4	0	3.07944	11008.2	-25.7794	shARL13b_1	VC2848	8.40309	187.3	187.3
Cell_08	3	10732.6	10736.3	-10.2245	-76.8603	0.967835	10743	0	4.98652	10734.2	-47.9254	shARL13b_1	VC2848	10.2245	456.8	456.8
Cell_08	4	1324.04	1326.27	-8.26677	-76.932	0.715559	1331.99	0	2.95336	1325.43	-26.8382	shARL13b_1	VC2848	8.26677	1324.04	1324.04
Cell_08	4	10072.5	10075.9	-12.9826	-76.0798	0.744711	10086	0	3.0664	10074.8	-57.6765	shARL13b_1	VC2848	12.9826	189.84	189.84
Cell_08	4	16310.1	16311.9	-9.75583	-76.0223	0.451891	16325.2	0	2.29184	16311.5	-44.1328	shARL13b_1	VC2848	9.75583	114.7	114.7
Cell_08	5	3653.55	3655.89	-8.7351	-74.5351	1.30499	3659.61	0	3.58809	3654.75	-27.0758	shARL13b_1	VC2848	8.7351	1708	1708
Cell_08	5	10826.2	10828.9	-9.21642	-73.5838	1.07227	10839	0	3.7947	10827.8	-46.8635	shARL13b_1	VC2848	9.21642	1533.42	1533.42
Cell_08	5	12419.6	12422.1	-12.1925	-73.9094	1.17275	12438.7	0	5.03172	12421.4	-80.8432	shARL13b_1	VC2848	12.1925	1593.4	1593.4
Cell_08	5	18824.7	18827.3	-7.43314	-73.3282	2.16172	18836.8	0	3.49949	18825.4	-33.0129	shARL13b_1	VC2848	7.43314	98.1	98.1
Cell_08	6	4660.65	4664.43	-5.74385	-74.8956	0.559522	4673.89	0	4.6473	4661.06	-43.9779	shARL13b_1	VC2848	5.74385	1364.53	1364.53
Cell_08	6	17178.3	17179.7	-18.0495	-72.7765	0.789494	17192.3	0	4.28087	17178.9	-96.2632	shARL13b_1	VC2848	18.0495	151.9	151.9
Cell_08	7	9671.06	9671.98	-8.452	-72.4561	0.41832	9677.84	0	3.20492	9671.71	-29.4128	shARL13b_1	VC2848	8.452	581.42	581.42
Cell_08	7	19204.1	19205.8	-11.4839	-72.9333	0.426769	19214.2	0	3.8798	19204.7	-50.4739	shARL13b_1	VC2848	11.4839	69.5	69.5
Cell_08	8	3647.04	3650.69	-8.24306	-71.2976	0.433489	3659.76	0	2.7621	3649.52	-32.3615	shARL13b_1	VC2848	8.24306	981.5	981.5
Cell_08	9	2606.74	2609.35	-6.77593	-70.5672	2.01293	2620.13	0	4.32503	2607.27	-35.4223	shARL13b_1	VC2848	6.77593	315.98	315.98
Cell_08	9	15056.1	15059.4	-10.9892	-66.9525	2.23777	15067.3	0	4.77072	15057.4	-56.5355	shARL13b_1	VC2848	10.9892	573.8	573.8
Cell_08	9	15678	15680.9	-19.9215	-67.1208	1.12088	15692	0	4.51722	15679.2	-106.156	shARL13b_1	VC2848	19.9215	621.9	621.9
Cell_08	9	19013.3	19018	-10.0967	-67.1553	1.48858	19033.4	0	6.61342	19016.1	-77.301	shARL13b_1	VC2848	10.0967	371.3	371.3
Cell_08	10	5892.01	5897.33	-6.95428	-65.1404	0.812163	5904.32	0	4.53619	5896.65	-32.9192	shARL13b_1	VC2848	6.95428	300.04	300.04
Cell_08	10	18439.4	18441	-10.6525	-65.1711	0.975751	18454	0	4.40074	18440.2	-70.1411	shARL13b_1	VC2848	10.6525	483.1	483.1
Cell_09	1	8565.39	8566.26	-9.91348	-25.9809	0.439572	8572.62	0	2.50946	8565.95	-32.41	shARL13b_1	VC2848	9.91348	2522.54	2522.54
Cell_09	1	9714.42	9716.17	-7.56415	-25.321	0.449233	9726.23	0	2.35186	9715.24	-24.1317	shARL13b_1	VC2848	7.56415	366.06	366.06
Cell_09	1	14587.4	14589.6	-12.7866	-23.9686	0.913694	14599.5	0	3.55095	14588.8	-55.1994	shARL13b_1	VC2848	12.7866	143.6	143.6
Cell_09	2	8375.35	8377.31	-13.2183	-22.4079	0.522326	8389.34	0	2.87826	8376.77	-59.811	shARL13b_1	VC2848	13.2183	2421.79	2421.79
Cell_09	3	4413.01	4415.1	-8.33431	-18.1974	0.586816	4423.61	0	2.48044	4414.06	-36.6568	shARL13b_1	VC2848	8.33431	2975.54	2975.54
Cell_09	3	14433.2	14434.8	-15.8455	-17.9861	0.69225	14446	0	3.01553	14434	-66.2155	shARL13b_1	VC2848	15.8455	447	447
Cell_09	4	4642.35	4644.64	-8.59614	-16.3916	0.9514	4650.04	0	3.68475	4643.47	-32.2439	shARL13b_1	VC2848	8.59614	4642.35	4642.35
Cell_09	4	13218.6	13221.5	-26.0265	-16.6735	0.492971	13234	0	3.49035	13220.4	-130.765	shARL13b_1	VC2848	26.0265	2211.1	2211.1
Cell_09	6	11978.3	11981.8	-10.4465	-15.8168	0.57331	11997.6	0	3.6142	11981.3	-60.5157	shARL13b_1	VC2848	10.4465	11978.3	11978.3
Cell_09	7	2592.15	2593.95	-9.85871	-13.9326	1.16971	2604.45	0	3.21743	2592.91	-40.769	shARL13b_1	VC2848	9.85871	2592.15	2592.15
Cell_09	7	10106.4	10108.1	-7.99473	-14.1915	0.90054	10117.9	0	3.12726	10107.1	-39.4972	shARL13b_1	VC2848	7.99473	6434.85	6434.85
Cell_09	7	13117.6	13120.5	-19.0455	-14.7008	0.658082	13136.7	0	3.72863	13119.7	-114.364	shARL13b_1	VC2848	19.0455	3011.2	3011.2
Cell_09	8	3973.5	3975.01	-10.397	-14.322	0.853301	3989.16	0	3.37278	3974.11	-64.316	shARL13b_1	VC2848	10.397	3973.5	3973.5
Cell_09	8	10739.8	10741.1	-11.9096	-13.7676	0.49242	10754.6	0	2.73	10740.4	-60.1001	shARL13b_1	VC2848	11.9096	6217.98	6217.98
Cell_09	9	12896.2	12898.4	-7.58855	-14.3291	1.42094	12904.9	0	3.75118	12896.8	-33.5868	shARL13b_1	VC2848	7.58855	7169.34	7169.34
Cell_09	10	1452.6	1457.84	-21.9268	-14.0098	0.872046	1477.12	0	3.88088	1456.28	-128.438	shARL13b_1	VC2848	21.9268	1452.6	1452.6
Cell_09	10	3617.78	3619.29	-7.00367	-14.2244	0.710646	3627.45	0	4.86636	3618.73	-30.2222	shARL13b_1	VC2848	7.00367	162.58	162.58
Cell_09	10	14103.6	14105.5	-8.30799	-14.8182	0.45523	14109.6	0	2.314	14105	-25.4698	shARL13b_1	VC2848	8.30799	3919.3	3919.3
Cell_09	10	19969	19969.6	-7.73562	-13.4555	0.275569	19974.1	0	2.84002	19969.6	-21.2587	shARL13b_1	VC2848	7.73562	1896.7	1896.7
Cell_09	11	8610.99	8612.85	-9.42034	-13.3213	0.830715	8622.22	0	2.95595	8611.78	-34.2571	shARL13b_1	VC2848	9.42034	3540.12	3540.12
Cell_09	11	16642.5	16646.4	-8.38702	-11.9677	0.690143	16653.4	0	2.38908	16646.1	-27.7934	shARL13b_1	VC2848	8.38702	3176.3	3176.3
Cell_09	12	4904.14	4905.77	-6.27797	-14.1138	1.32803	4916.72	0	2.67291	4905.28	-36.465	shARL13b_1	VC2848	6.27797	3664.59	3664.59
Cell_09	12	15176.1	15177.8	-8.53809	-12.0431	1.38585	15182.6	0	2.14226	15176.7	-22.5376	shARL13b_1	VC2848	8.53809	10272	10272
Cell_01	1	7846.04	7846.84	-14.8639	-17.2955	0.354533	7859.41	0	2.86312	7846.56	-65.8135	shARL13b_2	VC2848	14.8639	7846.04	7846.04
Cell_01	1	9829.28	9834.54	-10.7467	-15.9928	0.970899	9843.55	0	4.02817	9834.02	-41.2077	shARL13b_2	VC2848	10.7467	1983.24	1983.24
Cell_01	2	9261.53	9264.08	-9.68054	-15.8564	0.460004	9268.18	0	4.37825	9262.42	-38.2692	shARL13b_2	VC2848	9.68054	9261.53	9261.53
Cell_01	2	19569.9	19574.3	-12.7648	-11.9784	1.06075	19590.2	0	5.39345	19572.5	-79.2483	shARL13b_2	VC2848	12.7648	10308.4	10308.4
Cell_01	3	8380.91	8382.5	-7.27873	-11.8741	0.732565	8390.06	0	2.59066	8381.88	-23.7858	shARL13b_2	VC2848	7.27873	8380.91	8380.91
Cell_01	3	9527.1	9529.82	-14.9448	-11.0928	0.995571	9538.6	0	3.5622	9528.81	-65.1883	shARL13b_2	VC2848	14.9448	1146.19	1146.19
Cell_01	3	13785	13786.2	-23.7359	-13.2145	0.487183	13795.4	0	2.89817	13785.6	-82.7106	shARL13b_2	VC2848	23.7359	4257.9	4257.9
Cell_01	4	2106.54	2108.27	-7.06954	-12.0037	1.11573	2117.42	0	3.60343	2106.87	-35.8582	shARL13b_2	VC2848	7.06954	2106.54	2106.54
Cell_01	4	7591.52	7593.1	-13.1358	-11.8642	1.16391	7604.24	0	3.2603	7592.38	-62.7338	shARL13b_2	VC2848	13.1358	5484.98	5484.98
Cell_01	4	9951.39	9955.31	-15.7069	-10.3366	1.21752	9971.51	0	4.36572	9954.51	-98.6542	shARL13b_2	VC2848	15.7069	2359.87	2359.87
Cell_01	4	10607.7	10609.1	-25.401	-10.9022	0.586658	10620.6	0	3.50199	10608.4	-116.663	shARL13b_2	VC2848	25.401	656.31	656.31
Cell_01	4	14621.6	14624.5	-31.3142	-9.62177	1.06599	14636.8	0	5.9116	14623	-198.71	shARL13b_2	VC2848	31.3142	4013.9	4013.9
Cell_01	4	18745.5	18746.9	-17.3152	-9.72924	0.468297	18755.7	0	4.64603	18746.2	-73.7177	shARL13b_2	VC2848	17.3152	4123.9	4123.9
Cell_01	5	16446.9	16447.9	-7.07243	-13.5636	0.456704	16451.4	0	2.78735	16447.4	-14.2932	shARL13b_2	VC2848	7.07243	16446.9	16446.9
Cell_01	5	19508	19509.5	-16.6899	-12.4906	0.659201	19523.7	0	3.98429	19508.8	-77.6608	shARL13b_2	VC2848	16.6899	3061.1	3061.1
Cell_01	7	12000.9	12002.8	-12.5437	-12.6149	0.522977	12011.1	0	3.29022	12001.5	-50.1028	shARL13b_2	VC2848	12.5437	12000.9	12000.9
Cell_01	8	865.059	866.583	-8.28324	-13.1889	0.611809	874.581	0	4.77439	865.609	-44.2109	shARL13b_2	VC2848	8.28324	865.06	865.059
Cell_01	8	5718.33	5722.17	-14.7801	-12.7713	0.515711	5732.96	0	4.36235	5721.32	-84.5895	shARL13b_2	VC2848	14.7801	4853.27	4853.27
Cell_01	8	7801.11	7802.65	-13.5689	-13.0729	0.55311	7811.4	0	3.04932	7802.12	-53.3139	shARL13b_2	VC2848	13.5689	2082.78	2082.78
Cell_01	8	10370	10371.6	-8.89541	-11.7527	0.910535	10381.8	0	3.80912	10370.9	-40.1203	shARL13b_2	VC2848	8.89541	2568.89	2568.89
Cell_01	9	13994.4	13997.7	-35.5068	-10.5314	0.630928	14010.7	0	3.56568	13996.9	-153.983	shARL13b_2	VC2848	35.5068	13994.4	13994.4
Cell_01	9	18804	18806.5	-6.91575	-11.2176	0.793864	18816.9	0	2.48259	18806	-28.2968	shARL13b_2	VC2848	6.91575	4809.6	4809.6
Cell_01	10	13811.8	13814.5	-28.329	-10.715	0.571366	13828.1	0	3.14349	13813.9	-132.46	shARL13b_2	VC2848	28.329	13811.8	13811.8
Cell_02	1	5190.32	5193.5	-8.13194	-18.5766	1.5787	5212	0	4.58808	5191.07	-63.7577	shARL13b_2	VC2848	8.13194	1692.78	1692.78
Cell_02	2	1932.23	1933.92	-10.0955	-16.9795	0.760432	1945.9	0	3.48065	1933.35	-47.9265	shARL13b_2	VC2848	10.0955	1932.23	1932.23
Cell_02	2	13849.7	13851.9	-11.7386	-18.7178	1.64504	13862.8	0	3.80906	13851.2	-52.8911	shARL13b_2	VC2848	11.7386	3650.9	3650.9
Cell_02	3	16457.1	16459.3	-18.7639	-16.0197	0.829035	16479.6	0	4.54092	16458.1	-127.944	shARL13b_2	VC2848	18.7639	2627	2627
Cell_02	4	4571.27	4573.06	-8.44062	-14.7894	0.829239	4587.8	0	4.88088	4572.38	-80.4801	shARL13b_2	VC2848	8.44062	3003.96	3003.96
Cell_02	4	9561.29	9564.41	-14.4176	-13.3652	1.42056	9576.67	0	6.02846	9562.54	-105.458	shARL13b_2	VC2848	14.4176	1997.14	1997.14
Cell_02	4	11888.2	11889.4	-7.31379	-13.2552	0.308495	11902.2	0	4.54989	11888.7	-45.8886	shARL13b_2	VC2848	7.31379	1110.6	1110.6
Cell_02	4	17322.4	17325.7	-7.35612	-13.2004	1.03519	17332.9	0	2.43562	17324.5	-21.8713	shARL13b_2	VC2848	7.35612	1915.3	1915.3
Cell_02	4	19307.1	19308	-12.4195	-13.1234	0.416712	19330.7	0	3.02519	19307.7	-76.3952	shARL13b_2	VC2848	12.4195	1984.7	1984.7
Cell_02	5	9522.46	9523.62	-11.3963	-12.7978	0.546949	9530.39	0	2.45309	9522.93	-36.9784	shARL13b_2	VC2848	11.3963	765.41	765.41
Cell_02	6	5428.92	5434.04	-20.096	-11.7031	1.90209	5447.15	0	7.35698	5432.11	-107.998	shARL13b_2	VC2848	20.096	49.76	49.76
Cell_02	6	7867.01	7870.43	-9.3432	-12.611	2.06009	7888.66	0	3.33483	7868.82	-66.2187	shARL13b_2	VC2848	9.3432	1459.89	1459.89
Cell_02	6	11300.5	11303.2	-6.0701	-12.0941	0.711607	11307.9	0	3.14471	11301.8	-21.659	shARL13b_2	VC2848	6.0701	3433.49	3433.49
Cell_02	6	16199.3	16200.5	-5.70446	-12.2884	0.468282	16204.9	0	2.69496	16199.9	-17.8992	shARL13b_2	VC2848	5.70446	4898.8	4898.8
Cell_02	7	7144.25	7145.41	-8.56956	-11.9196	0.490128	7154.2	0	3.46429	7145.16	-34.352	shARL13b_2	VC2848	8.56956	4418.86	4418.86
Cell_02	7	9250.04	9252.69	-5.07451	-12.4423	1.62549	9258.82	0	3.176	9250.84	-23.4445	shARL13b_2	VC2848	5.07451	73.82	73.82
Cell_02	8	3168.24	3169.01	-8.02907	-13.1011	0.42154	3174.55	0	3.93434	3168.66	-29.9789	shARL13b_2	VC2848	8.02907	3168.24	3168.24
Cell_02	8	17465.5	17467.2	-16.9614	-14.7213	0.403934	17479.1	0	3.15609	17466.1	-75.2699	shARL13b_2	VC2848	16.9614	1274.9	1274.9
Cell_02	8	19498.4	19499.9	-6.73711	-13.8498	0.968365	19511.7	0	2.9653	19498.9	-38.1299	shARL13b_2	VC2848	6.73711	1266.9	1266.9
Cell_02	9	6352.62	6353.41	-7.10251	-14.5769	0.424431	6360.74	0	2.84134	6353.04	-30.1411	shARL13b_2	VC2848	7.10251	1706.58	1706.58
Cell_02	10	7687.66	7689.08	-8.14825	-14.7459	0.712226	7692.46	0	2.55855	7688.13	-24.6646	shARL13b_2	VC2848	8.14825	6216.38	6216.38
Cell_02	10	18658.8	18661.5	-13.1039	-15.0389	1.92625	18679.2	0	4.16499	18659.8	-88.1365	shARL13b_2	VC2848	13.1039	5405.9	5405.9
Cell_02	2	19681.7	19682.9	-6.77138	-15.8359	0.718386	19687	0	2.17672	19682.3	-17.9497	shARL13b_2	VC2848	6.77138	1511.2	1511.2
Cell_07	1	3522.81	3523.72	-14.4249	-21.2984	0.471743	3529.11	0	2.99047	3523.41	-44.2608	shARL13b_2	VC2848	14.4249	743.01	743.01
Cell_07	2	1763.59	1765.36	-10.2882	-16.6406	0.649372	1776.73	0	3.22335	1764.86	-52.1255	shARL13b_2	VC2848	10.2882	779.41	779.406
Cell_07	3	11872.3	11874.2	-11.3058	-10.575	0.81639	11880.2	0	3.84199	11873.1	-48.6389	shARL13b_2	VC2848	11.3058	631	631
Cell_07	4	8424.58	8427.29	-11.0806	-8.44451	0.499548	8431.64	0	1.6689	8426.66	-27.3769	shARL13b_2	VC2848	11.0806	2798.22	2798.22
Cell_07	4	15307	15310.8	-9.92489	-6.46269	0.588507	15320.6	0	2.01894	15310.5	-31.9654	shARL13b_2	VC2848	9.92489	2221.7	2221.7
Cell_07	4	19498.5	19499.3	-13.3057	-7.20169	0.442118	19513.5	0	3.36894	19499.1	-65.1603	shARL13b_2	VC2848	13.3057	3465.1	3465.1
Cell_07	5	3972.31	3973.21	-16.0664	-5.76591	0.389576	3984.44	0	2.6268	3972.84	-63.8072	shARL13b_2	VC2848	16.0664	1401.4	1401.4
Cell_07	5	17835.3	17836.5	-11.5026	-5.44018	0.641191	17843.9	0	1.82562	17836	-31.3575	shARL13b_2	VC2848	11.5026	1796.8	1796.8
Cell_07	6	1510.1	1510.62	-14.9329	-8.66283	0.290699	1522.27	0	3.22818	1510.62	-65.3738	shARL13b_2	VC2848	14.9329	1510.1	1510.1
Cell_07	6	5144.61	5146.51	-18.1429	-6.63721	0.824506	5157.67	0	4.13958	5146.14	-84.7045	shARL13b_2	VC2848	18.1429	94.66	94.66
Cell_07	6	14021.2	14024.5	-16.3758	-6.32934	1.04651	14033.7	0	6.65246	14022.4	-107.938	shARL13b_2	VC2848	16.3758	1992	1992
Cell_07	6	18160	18160.9	-7.32104	-6.66211	0.456161	18173.3	0	1.57954	18160.4	-28.8689	shARL13b_2	VC2848	7.32104	2882.2	2882.2
Cell_07	7	8821.28	8823.39	-10.1488	-4.14535	0.468413	8828.55	0	3.8076	8822.22	-36.2304	shARL13b_2	VC2848	10.1488	3073.41	3073.41
Cell_07	7	15327.6	15328.2	-8.15566	-3.57511	0.30354	15334.2	0	1.53357	15328.1	-26.5249	shARL13b_2	VC2848	8.15566	1542	1542
Cell_07	8	3570.81	3574.31	-8.82311	-3.93864	2.51087	3586.85	0	2.44177	3572.99	-44.0442	shARL13b_2	VC2848	8.82311	1762.7	1762.7
Cell_07	8	8605.12	8606.45	-6.77045	-2.47016	0.586478	8619.52	0	3.16817	8605.65	-34.0889	shARL13b_2	VC2848	6.77045	1857.8	1857.8
Cell_07	8	14970.7	14972.3	-8.07359	-2.00922	1.07192	14987	0	3.89602	14971.8	-56.1016	shARL13b_2	VC2848	8.07359	5217.65	5217.65
Cell_07	9	2604.07	2606.35	-5.75503	-2.07585	1.22513	2610.93	0	3.5965	2605.04	-23.0564	shARL13b_2	VC2848	5.75503	1366.77	1366.77
Cell_07	9	11172.6	11175.2	-15.8824	-0.926596	0.54475	11187.8	0	3.22188	11174.7	-65.6689	shARL13b_2	VC2848	15.8824	1258.4	1258.4
Cell_07	9	16624.9	16627.6	-14.6803	-0.223917	2.06435	16641.4	0	3.75866	16626.4	-69.4683	shARL13b_2	VC2848	14.6803	2680.2	2680.2
Cell_07	10	3218.62	3219.59	-22.0536	-0.425186	0.560159	3231.36	0	3.05882	3219.23	-85.0048	shARL13b_2	VC2848	22.0536	2250.32	2250.32
Cell_07	10	8403.59	8407.5	-9.92796	0.0282117	1.37269	8434.6	0	6.52101	8404.7	-122.804	shARL13b_2	VC2848	9.92796	639.68	639.68
Cell_07	10	12826.4	12828.8	-6.7146	1.19112	1.51332	12833.9	0	3.88858	12827.5	-25.5679	shARL13b_2	VC2848	6.7146	1389.5	1389.5

## Sheet: Figure_3D_E
Cell	Treatment	Dissociation	AVG_AmpY	AVG_Vm	AVG_Rin
Cell_11	CTL	VC2658	11.9659	-65.2001	164.93
Cell_12	shARL13b_1	VC2658	10.4212	-58.5042	394.858
Cell_07	CTL	VC2661	9.96986	-64.3191	200
Cell_12	shARL13b_1	VC2661	12.336	-65.3652	230.108
Cell_05	shARL13b_1	VC2680	13.8722	-55.6508	150.773
Cell_12	CTL	VC2680	10.79	-64.1933	211.351
Cell_07	shARL13b_1	VC2681	11.301	-63.6769	156.643
Cell_10	shARL13b_1	VC2681	11.314	-64.6327	220.174
Cell_08	shARL13b_1	VC2682	15.1111	-63.954	145
Cell_04	CTL	VC2682	9.96279	-64.3146	125.081
Cell_02	shARL13b_1	VC2682	16.4448	-63.1569	209.84
Cell_05	shARL13b_1	VC2682	10.424	-65.4989	183.406
Cell_03	CTL	VC2683	8.60439	-61.8297	174
Cell_17	shARL13b_1	VC2683	12.0107	-63.0502	122.473
Cell_13	shARL13b_1	VC2683	9.81747	-56.0529	450
Cell_15	shARL13b_1	VC2683	10.5956	-68.0858	178
Cell_08	CTL	VC2810	10.4781	-65.4665	257.975
Cell_04	shARL13b_2	VC2810	13.9217	-69.4354	159.647
Cell_07	CTL	VC2836	10.8902	-63.3643	160
Cell_09	shARL13b_2	VC2836	10.9636	-62.6646	164
Cell_06	shARL13b_2	VC2836	9.99501	-65.2537	115
Cell_04	CTL	VC2836	9.82943	-66.1166	510.977
Cell_09	shARL13b_2	VC2837	13.6084	-54.4724	118
Cell_04	shARL13b_2	VC2837	16.8918	-53.8055	369.372
Cell_06	shARL13b_2	VC2838	10.2987	-64.0243	171.314
Cell_04	CTL	VC2838	10.3653	-62.6829	208
Cell_02	CTL	VC2838	9.06302	-64.8926	180
Cell_03	shARL13b_2	VC2839	12.2048	-62.7255	143
Cell_02	CTL	VC2839	11.5619	-69.4147	122
Cell_05	CTL	VC2839	9.26081	-69.2767	194
Cell_06	shARL13b_2	VC2839	10.3953	-71.8743	332
Cell_07	shARL13b_2	VC2839	13.5949	-74.0947	271.065
Cell_06	shARL13b_2	VC2840	14.0089	-63.6001	289
Cell_01	CTL	VC2840	12.8268	-65.7247	146.009
Cell_09	shARL13b_2	VC2840	14.0534	-68.2414	112
Cell_05	CTL	VC2840	12.4403	-69.4192	530
Cell_13	shARL13b_1	VC2842	12.9057	-63.6024	120.194
Cell_08	shARL13b_1	VC2842	12.2299	-60.5625	176
Cell_10	CTL	VC2842	10.948	-61.9847	185.171
Cell_02	shARL13b_1	VC2842	10.2745	-64.3851	131
Cell_12	shARL13b_2	VC2842	13.6375	-60.0815	235.285
Cell_06	CTL	VC2842	11.8312	-65.2518	159
Cell_09	shARL13b_1	VC2842	14.0091	-62.7575	198
Cell_01	shARL13b_1	VC2842	10.0068	-66.1933	150
Cell_11	CTL	VC2842	12.4924	-66.0329	167
Cell_07	shARL13b_1	VC2842	12.472	-59.8836	520
Cell_04	shARL13b_2	VC2842	11.3924	-65.3393	188
Cell_03	CTL	VC2842	10.2529	-64.6731	330
Cell_14	shARL13b_1	VC2842	16.7458	-67.7822	184.524
Cell_03	CTL	VC2843	11.2212	-62.7157	151.844
Cell_06	shARL13b_2	VC2843	10.6991	-60.2515	189
Cell_09	shARL13b_1	VC2843	12.0734	-61.0012	271.853
Cell_01	shARL13b_1	VC2843	11.298	-66.6175	104.918
Cell_04	shARL13b_1	VC2843	12.8396	-60.4062	367.946
Cell_05	shARL13b_2	VC2843	11.3656	-66.3399	237.561
Cell_02	CTL	VC2843	9.84244	-68.0168	139.317
Cell_01	CTL	VC2845	13.2285	-55.8895	275.809
Cell_15	shARL13b_1	VC2845	10.4281	-60.7803	236.988
Cell_07	shARL13b_2	VC2845	11.1827	-63.8506	259.762
Cell_13	CTL	VC2845	9.18102	-65.773	197
Cell_09	shARL13b_2	VC2845	13.4032	-66.6632	227.829
Cell_10	shARL13b_2	VC2845	11.1727	-65.4425	329.692
Cell_12	shARL13b_2	VC2845	10.6108	-67.3202	228
Cell_02	CTL	VC2845	8.69067	-67.555	311.081
Cell_11	shARL13b_2	VC2845	10.2337	-68.5462	267
Cell_08	shARL13b_1	VC2848	10.8339	-60.426	140
Cell_05	CTL	VC2848	9.49293	-64.2413	298
Cell_09	shARL13b_1	VC2848	11.6738	-65.8768	241.765
Cell_02	shARL13b_2	VC2848	11.1187	-67.1341	198.081
Cell_01	shARL13b_2	VC2848	15.5019	-68.1081	173
Cell_07	shARL13b_2	VC2848	11.8495	-69.07	130
