# Supplementary material for: Ciliary neuropeptidergic signaling dynamically regulates excitatory synapses in postnatal neocortical pyramidal neurons
Source: eLife. 2021 Mar 2;10:e65427. doi: 10.7554/eLife.65427 (PMC7952091; doi:10.7554/eLife.65427)
Supplement: Figure 4—source data 1. [file elife-65427-fig4-data1.xlsx]

## Sheet: Figure_4A
Cell	CellID	Spikes	Min	Max	Rin_estimated	Treatment	Dissociation
Cell_04_0006.ibw	C4	1	-56.3965	37.5977	-3759.77	CTL	VC2635
Cell_04_0007.ibw	C4	0	-54.6875	-49.5605	-205.078	CTL	VC2635
Cell_04_0008.ibw	C4	0	-58.3496	-50.0488	-332.031	CTL	VC2635
Cell_04_0009.ibw	C4	0	-55.9082	-50.0488	-234.375	CTL	VC2635
Cell_04_0010.ibw	C4	1	-53.7109	-49.0723	-185.547	CTL	VC2635
Cell_05_0001.ibw	C5	1	-58.5938	-49.3164	-371.094	CTL	VC2635
Cell_05_0002.ibw	C5	1	-59.082	-50.5371	-341.797	CTL	VC2635
Cell_05_0003.ibw	C5	1	-55.6641	-41.9922	-546.875	CTL	VC2635
Cell_05_0004.ibw	C5	3	-52.2461	-44.6777	-302.734	CTL	VC2635
Cell_05_0005.ibw	C5	1	-52.2461	-43.7012	-341.797	CTL	VC2635
Cell_05_0006.ibw	C5	0	-56.3965	-48.584	-312.5	CTL	VC2635
Cell_08_0007.ibw	C8	2	-52.2461	-49.0723	-126.953	CTL	VC2635
Cell_08_0008.ibw	C8	2	-51.0254	-48.0957	-117.188	CTL	VC2635
Cell_08_0009.ibw	C8	2	-52.9785	-50.0488	-117.188	CTL	VC2635
Cell_08_0010.ibw	C8	2	-54.1992	-48.8281	-214.844	CTL	VC2635
Cell_23_0001.ibw	C23	3	-64.4531	-52.002	-498.047	CTL	VC2636
Cell_23_0002.ibw	C23	4	-64.209	-50.293	-556.641	CTL	VC2636
Cell_23_0003.ibw	C23	6	-63.2324	-53.2227	-400.391	CTL	VC2636
Cell_23_0004.ibw	C23	3	-64.6973	-50.7812	-556.641	CTL	VC2636
Cell_23_0005.ibw	C23	8	-64.4531	-52.2461	-488.281	CTL	VC2636
Cell_23_0006.ibw	C23	6	-64.9414	-51.2695	-546.875	CTL	VC2636
Cell_23_0007.ibw	C23	6	-65.1855	-50.7812	-576.172	CTL	VC2636
Cell_23_0008.ibw	C23	1	-66.4062	-52.9785	-537.109	CTL	VC2636
Cell_23_0009.ibw	C23	6	-65.918	-52.2461	-546.875	CTL	VC2636
Cell_23_0010.ibw	C23	4	-62.9883	-51.0254	-478.516	CTL	VC2636
Cell_24_0003.ibw	C24	5	-55.6641	-49.8047	-234.375	CTL	VC2636
Cell_24_0004.ibw	C24	8	-54.9316	-47.6074	-292.969	CTL	VC2636
Cell_24_0005.ibw	C24	2	-56.3965	-49.8047	-263.672	CTL	VC2636
Cell_24_0006.ibw	C24	4	-55.9082	-49.5605	-253.906	CTL	VC2636
Cell_24_0007.ibw	C24	2	-57.373	-51.0254	-253.906	CTL	VC2636
Cell_24_0008.ibw	C24	7	-57.1289	-49.8047	-292.969	CTL	VC2636
Cell_24_0009.ibw	C24	7	-57.1289	-47.8516	-371.094	CTL	VC2636
Cell_25_0001.ibw	C24	0	-60.3027	-54.6875	-224.609	CTL	VC2636
Cell_25_0002.ibw	C24	0	-59.8145	-55.4199	-175.781	CTL	VC2636
Cell_25_0003.ibw	C24	0	-58.5938	-53.9551	-185.547	CTL	VC2636
Cell_25_0004.ibw	C24	8	-58.1055	-50.5371	-302.734	CTL	VC2636
Cell_25_0005.ibw	C24	2	-57.8613	-53.7109	-166.016	CTL	VC2636
Cell_25_0006.ibw	C24	2	-59.082	-52.7344	-253.906	CTL	VC2636
Cell_25_0007.ibw	C24	5	-58.8379	-51.2695	-302.734	CTL	VC2636
Cell_25_0008.ibw	C24	0	-59.082	-52.9785	-244.141	CTL	VC2636
Cell_25_0009.ibw	C24	2	-59.5703	-52.9785	-263.672	CTL	VC2636
Cell_25_0010.ibw	C24	1	-59.082	-51.0254	-322.266	CTL	VC2636
Cell_29_0003.ibw	C29	0	-57.1289	-50.5371	-263.672	shARL13b	VC2636
Cell_29_0004.ibw	C29	0	-56.6406	-51.7578	-195.312	shARL13b	VC2636
Cell_29_0005.ibw	C29	2	-56.3965	-51.7578	-185.547	shARL13b	VC2636
Cell_29_0006.ibw	C29	1	-55.1758	-50.5371	-185.547	shARL13b	VC2636
Cell_29_0007.ibw	C29	0	-55.4199	-50.0488	-214.844	shARL13b	VC2636
Cell_29_0008.ibw	C29	1	-55.1758	-50.293	-195.312	shARL13b	VC2636
Cell_29_0009.ibw	C29	2	-58.5938	-50.5371	-322.266	shARL13b	VC2636
Cell_29_0010.ibw	C29	2	-54.9316	-49.8047	-205.078	shARL13b	VC2636
Cell_30_0001.ibw	C30	0	-68.1152	-50.5371	-703.125	shARL13b	VC2636
Cell_30_0002.ibw	C30	0	-67.1387	-49.5605	-703.125	shARL13b	VC2636
Cell_30_0003.ibw	C30	0	-68.8477	-52.002	-673.828	shARL13b	VC2636
Cell_30_0004.ibw	C30	1	-67.3828	-51.2695	-644.531	shARL13b	VC2636
Cell_30_0005.ibw	C30	1	-65.1855	-48.0957	-683.594	shARL13b	VC2636
Cell_30_0006.ibw	C30	3	-65.1855	-49.3164	-634.766	shARL13b	VC2636
Cell_30_0007.ibw	C30	1	-68.3594	-48.8281	-781.25	shARL13b	VC2636
Cell_30_0008.ibw	C30	1	-67.1387	-49.8047	-693.359	shARL13b	VC2636
Cell_30_0009.ibw	C30	2	-66.1621	-49.0723	-683.594	shARL13b	VC2636
Cell_30_0010.ibw	C30	2	-67.8711	-49.8047	-722.656	shARL13b	VC2636
Cell_11_0003.ibw	C11	1	-60.791	-53.4668	-292.969	CTL	VC2638
Cell_11_0004.ibw	C11	0	-60.0586	-51.0254	-361.328	CTL	VC2638
Cell_11_0005.ibw	C11	0	-59.3262	-50.7812	-341.797	CTL	VC2638
Cell_11_0006.ibw	C11	1	-58.8379	-50.7812	-322.266	CTL	VC2638
Cell_11_0007.ibw	C11	0	-59.3262	-50.293	-361.328	CTL	VC2638
Cell_11_0008.ibw	C11	1	-59.3262	-50.293	-361.328	CTL	VC2638
Cell_11_0009.ibw	C11	0	-59.082	-50.0488	-361.328	CTL	VC2638
Cell_11_0010.ibw	C11	0	-58.5938	-50.0488	-341.797	CTL	VC2638
Cell_25_0001.ibw	C25	0	-56.1523	-49.5605	-263.672	CTL	VC2638
Cell_25_0002.ibw	C25	0	-56.6406	-49.8047	-273.438	CTL	VC2638
Cell_25_0003.ibw	C25	0	-56.3965	-48.8281	-302.734	CTL	VC2638
Cell_25_0004.ibw	C25	0	-56.1523	-48.3398	-312.5	CTL	VC2638
Cell_25_0005.ibw	C25	2	-55.9082	-47.8516	-322.266	CTL	VC2638
Cell_25_0006.ibw	C25	1	-55.6641	-48.0957	-302.734	CTL	VC2638
Cell_25_0007.ibw	C25	0	-56.6406	-47.6074	-361.328	CTL	VC2638
Cell_25_0008.ibw	C25	0	-56.6406	-48.584	-322.266	CTL	VC2638
Cell_25_0009.ibw	C25	1	-56.3965	-48.0957	-332.031	CTL	VC2638
Cell_25_0010.ibw	C25	2	-56.1523	-47.3633	-351.562	CTL	VC2638
Cell_29_0001.ibw	C29	2	-58.3496	-51.5137	-273.438	CTL	VC2638
Cell_29_0002.ibw	C29	0	-58.3496	-51.5137	-273.438	CTL	VC2638
Cell_29_0003.ibw	C29	4	-57.1289	-51.0254	-244.141	CTL	VC2638
Cell_29_0004.ibw	C29	0	-57.1289	-49.8047	-292.969	CTL	VC2638
Cell_29_0005.ibw	C29	0	-55.6641	-48.8281	-273.438	CTL	VC2638
Cell_29_0006.ibw	C29	1	-58.3496	-51.0254	-292.969	CTL	VC2638
Cell_29_0007.ibw	C29	1	-57.1289	-47.8516	-371.094	CTL	VC2638
Cell_29_0008.ibw	C29	0	-57.8613	-50.0488	-312.5	CTL	VC2638
Cell_29_0009.ibw	C29	1	-58.1055	-51.0254	-283.203	CTL	VC2638
Cell_29_0010.ibw	C29	0	-57.373	-51.7578	-224.609	CTL	VC2638
Cell_31_0001.ibw	C31	2	-55.4199	-50.7812	-185.547	CTL	VC2638
Cell_31_0002.ibw	C31	4	-55.9082	-50.7812	-205.078	CTL	VC2638
Cell_31_0003.ibw	C31	3	-52.4902	-46.875	-224.609	CTL	VC2638
Cell_31_0004.ibw	C31	2	-55.1758	-49.3164	-234.375	CTL	VC2638
Cell_31_0005.ibw	C31	4	-53.9551	-48.8281	-205.078	CTL	VC2638
Cell_31_0006.ibw	C31	0	-55.1758	-48.3398	-273.438	CTL	VC2638
Cell_31_0007.ibw	C31	5	-54.1992	-48.3398	-234.375	CTL	VC2638
Cell_31_0008.ibw	C31	7	-55.1758	-50.293	-195.312	CTL	VC2638
Cell_31_0009.ibw	C31	7	-51.5137	-45.166	-253.906	CTL	VC2638
Cell_31_0010.ibw	C31	2	-52.7344	-47.3633	-214.844	CTL	VC2638
Cell_18_0001.ibw	C18	1	-61.0352	-51.0254	-400.391	shARL13b	VC2638
Cell_18_0002.ibw	C18	0	-62.0117	-53.2227	-351.562	shARL13b	VC2638
Cell_18_0003.ibw	C18	0	-63.4766	-49.3164	-566.406	shARL13b	VC2638
Cell_18_0004.ibw	C18	2	-60.5469	-51.0254	-380.859	shARL13b	VC2638
Cell_18_0005.ibw	C18	0	-61.2793	-51.0254	-410.156	shARL13b	VC2638
Cell_18_0006.ibw	C18	1	-60.5469	-49.3164	-449.219	shARL13b	VC2638
Cell_18_0007.ibw	C18	2	-60.3027	-48.584	-468.75	shARL13b	VC2638
Cell_18_0008.ibw	C18	3	-60.0586	-47.8516	-488.281	shARL13b	VC2638
Cell_18_0009.ibw	C18	0	-60.0586	-48.3398	-468.75	shARL13b	VC2638
Cell_18_0010.ibw	C18	0	-61.2793	-50.7812	-419.922	shARL13b	VC2638
Cell_04_0001.ibw	C4	12	-60.791	-48.0957	-507.812	CTL	VC2639
Cell_04_0002.ibw	C4	14	-63.7207	-53.7109	-400.391	CTL	VC2639
Cell_04_0003.ibw	C4	0	-65.4297	-55.1758	-410.156	CTL	VC2639
Cell_04_0004.ibw	C4	5	-66.1621	-55.4199	-429.688	CTL	VC2639
Cell_04_0005.ibw	C4	9	-62.0117	-55.4199	-263.672	CTL	VC2639
Cell_04_0006.ibw	C4	4	-64.6973	-48.8281	-634.766	CTL	VC2639
Cell_04_0007.ibw	C4	9	-65.4297	-53.2227	-488.281	CTL	VC2639
Cell_04_0008.ibw	C4	10	-63.7207	-51.5137	-488.281	CTL	VC2639
Cell_04_0009.ibw	C4	1	-65.4297	-57.1289	-332.031	CTL	VC2639
Cell_04_0010.ibw	C4	0	-66.4062	-55.6641	-429.688	CTL	VC2639
Cell_10_0001.ibw	C10	0	-54.1992	-49.8047	-175.781	CTL	VC2639
Cell_10_0002.ibw	C10	0	-54.6875	-49.8047	-195.312	CTL	VC2639
Cell_10_0003.ibw	C10	3	-55.4199	-51.0254	-175.781	CTL	VC2639
Cell_10_0004.ibw	C10	1	-55.6641	-51.5137	-166.016	CTL	VC2639
Cell_10_0005.ibw	C10	3	-56.3965	-52.002	-175.781	CTL	VC2639
Cell_10_0006.ibw	C10	4	-56.3965	-52.4902	-156.25	CTL	VC2639
Cell_10_0007.ibw	C10	0	-56.1523	-52.002	-166.016	CTL	VC2639
Cell_10_0008.ibw	C10	0	-56.3965	-50.0488	-253.906	CTL	VC2639
Cell_10_0009.ibw	C10	2	-55.1758	-51.2695	-156.25	CTL	VC2639
Cell_10_0010.ibw	C10	3	-55.1758	-50.293	-195.312	CTL	VC2639
Cell_13_0001.ibw	C13	1	-59.8145	-52.2461	-302.734	shARL13b	VC2639
Cell_13_0002.ibw	C13	2	-60.791	-50.293	-419.922	shARL13b	VC2639
Cell_13_0003.ibw	C13	2	-60.791	-53.2227	-302.734	shARL13b	VC2639
Cell_13_0004.ibw	C13	3	-59.5703	-52.7344	-273.438	shARL13b	VC2639
Cell_13_0005.ibw	C13	4	-60.0586	-44.9219	-605.469	shARL13b	VC2639
Cell_13_0006.ibw	C13	2	-60.3027	-52.4902	-312.5	shARL13b	VC2639
Cell_13_0007.ibw	C13	5	-60.5469	-52.2461	-332.031	shARL13b	VC2639
Cell_13_0008.ibw	C13	3	-59.8145	-52.2461	-302.734	shARL13b	VC2639
Cell_13_0009.ibw	C13	4	-60.5469	-51.0254	-380.859	shARL13b	VC2639
Cell_13_0010.ibw	C13	6	-60.3027	-51.2695	-361.328	shARL13b	VC2639
Cell_16_0001.ibw	C16	3	-56.6406	-51.5137	-205.078	shARL13b	VC2639
Cell_16_0002.ibw	C16	6	-55.1758	-45.4102	-390.625	shARL13b	VC2639
Cell_16_0003.ibw	C16	2	-55.9082	-51.5137	-175.781	shARL13b	VC2639
Cell_16_0004.ibw	C16	3	-57.8613	-52.4902	-214.844	shARL13b	VC2639
Cell_16_0005.ibw	C16	3	-57.8613	-51.5137	-253.906	shARL13b	VC2639
Cell_16_0006.ibw	C16	7	-58.3496	-53.4668	-195.312	shARL13b	VC2639
Cell_16_0007.ibw	C16	6	-58.8379	-53.7109	-205.078	shARL13b	VC2639
Cell_16_0008.ibw	C16	4	-58.8379	-53.9551	-195.312	shARL13b	VC2639
Cell_16_0009.ibw	C16	3	-55.4199	-46.3867	-361.328	shARL13b	VC2639
Cell_16_0010.ibw	C16	4	-56.6406	-51.0254	-224.609	shARL13b	VC2639
Cell_18_0001.ibw	C18	1	-58.8379	-47.1191	-468.75	shARL13b	VC2639
Cell_18_0002.ibw	C18	3	-60.5469	-49.0723	-458.984	shARL13b	VC2639
Cell_18_0003.ibw	C18	6	-61.2793	-49.8047	-458.984	shARL13b	VC2639
Cell_18_0004.ibw	C18	13	-61.0352	-49.8047	-449.219	shARL13b	VC2639
Cell_18_0005.ibw	C18	4	-61.0352	-49.5605	-458.984	shARL13b	VC2639
Cell_18_0006.ibw	C18	4	-60.791	-47.8516	-517.578	shARL13b	VC2639
Cell_18_0007.ibw	C18	1	-60.791	-48.584	-488.281	shARL13b	VC2639
Cell_18_0008.ibw	C18	0	-61.0352	-49.3164	-468.75	shARL13b	VC2639
Cell_18_0009.ibw	C18	6	-61.7676	-51.2695	-419.922	shARL13b	VC2639
Cell_18_0010.ibw	C18	7	-62.0117	-52.002	-400.391	shARL13b	VC2639
Cell_20_0001.ibw	C20	2	-68.1152	-58.5938	-380.859	shARL13b	VC2639
Cell_20_0002.ibw	C20	21	-67.627	-57.1289	-419.922	shARL13b	VC2639
Cell_20_0003.ibw	C20	9	-66.1621	-55.6641	-419.922	shARL13b	VC2639
Cell_20_0004.ibw	C20	10	-63.7207	-50.7812	-517.578	shARL13b	VC2639
Cell_20_0005.ibw	C20	22	-63.9648	-49.8047	-566.406	shARL13b	VC2639
Cell_20_0006.ibw	C20	14	-65.4297	-52.9785	-498.047	shARL13b	VC2639
Cell_20_0007.ibw	C20	13	-65.6738	-52.7344	-517.578	shARL13b	VC2639
Cell_20_0008.ibw	C20	18	-61.5234	-53.4668	-322.266	shARL13b	VC2639
Cell_20_0009.ibw	C20	14	-65.6738	-52.7344	-517.578	shARL13b	VC2639
Cell_20_0010.ibw	C20	11	-66.6504	-53.7109	-517.578	shARL13b	VC2639
Cell_23_0001.ibw	C23	0	-55.1758	-50.7812	-175.781	shARL13b	VC2639
Cell_23_0002.ibw	C23	0	-57.1289	-51.0254	-244.141	shARL13b	VC2639
Cell_23_0003.ibw	C23	4	-55.6641	-50.293	-214.844	shARL13b	VC2639
Cell_23_0004.ibw	C23	1	-55.9082	-50.293	-224.609	shARL13b	VC2639
Cell_23_0005.ibw	C23	7	-55.9082	-50.7812	-205.078	shARL13b	VC2639
Cell_23_0006.ibw	C23	13	-55.9082	-50.0488	-234.375	shARL13b	VC2639
Cell_23_0007.ibw	C23	5	-56.3965	-51.0254	-214.844	shARL13b	VC2639
Cell_23_0008.ibw	C23	7	-58.3496	-52.2461	-244.141	shARL13b	VC2639
Cell_23_0009.ibw	C23	8	-56.1523	-50.7812	-214.844	shARL13b	VC2639
Cell_23_0010.ibw	C23	6	-59.082	-50.7812	-332.031	shARL13b	VC2639
Cell_28_0001.ibw	C28	10	-53.9551	-51.0254	-117.188	shARL13b	VC2639
Cell_28_0002.ibw	C28	9	-54.4434	-51.0254	-136.719	shARL13b	VC2639
Cell_28_0003.ibw	C28	2	-54.4434	-49.0723	-214.844	shARL13b	VC2639
Cell_28_0004.ibw	C28	5	-54.9316	-51.5137	-136.719	shARL13b	VC2639
Cell_28_0005.ibw	C28	7	-55.1758	-51.2695	-156.25	shARL13b	VC2639
Cell_28_0006.ibw	C28	12	-54.6875	-51.2695	-136.719	shARL13b	VC2639
Cell_28_0007.ibw	C28	8	-54.4434	-50.7812	-146.484	shARL13b	VC2639
Cell_28_0008.ibw	C28	12	-53.7109	-50.0488	-146.484	shARL13b	VC2639
Cell_28_0009.ibw	C28	7	-53.9551	-50.5371	-136.719	shARL13b	VC2639
Cell_28_0010.ibw	C28	19	-54.4434	-51.0254	-136.719	shARL13b	VC2639
Cell_02_0001.ibw	C2	0	-54.4434	-49.8047	-185.547	CTL	VC2640
Cell_02_0002.ibw	C2	1	-54.9316	-50.293	-185.547	CTL	VC2640
Cell_02_0003.ibw	C2	11	-55.9082	-51.7578	-166.016	CTL	VC2640
Cell_02_0004.ibw	C2	0	-55.1758	-45.166	-400.391	CTL	VC2640
Cell_02_0005.ibw	C2	5	-56.8848	-52.4902	-175.781	CTL	VC2640
Cell_02_0006.ibw	C2	6	-56.6406	-52.2461	-175.781	CTL	VC2640
Cell_02_0007.ibw	C2	4	-57.1289	-52.2461	-195.312	CTL	VC2640
Cell_02_0008.ibw	C2	13	-55.6641	-50.0488	-224.609	CTL	VC2640
Cell_02_0009.ibw	C2	7	-55.4199	-50.5371	-195.312	CTL	VC2640
Cell_02_0010.ibw	C2	4	-55.1758	-50.293	-195.312	CTL	VC2640
Cell_04_0001.ibw	C4	0	-62.9883	-52.4902	-419.922	CTL	VC2640
Cell_04_0002.ibw	C4	0	-62.9883	-51.5137	-458.984	CTL	VC2640
Cell_04_0003.ibw	C4	0	-64.209	-53.4668	-429.688	CTL	VC2640
Cell_04_0004.ibw	C4	0	-63.7207	-52.9785	-429.688	CTL	VC2640
Cell_04_0005.ibw	C4	1	-63.2324	-43.9453	-771.484	CTL	VC2640
Cell_04_0006.ibw	C4	0	-64.209	-52.7344	-458.984	CTL	VC2640
Cell_04_0007.ibw	C4	1	-63.9648	-51.2695	-507.812	CTL	VC2640
Cell_04_0008.ibw	C4	2	-64.209	-53.4668	-429.688	CTL	VC2640
Cell_04_0009.ibw	C4	2	-64.6973	-51.7578	-517.578	CTL	VC2640
Cell_04_0010.ibw	C4	8	-64.209	-50.0488	-566.406	CTL	VC2640
Cell_06_0001.ibw	C6	4	-55.6641	-51.5137	-166.016	CTL	VC2640
Cell_06_0002.ibw	C6	3	-56.3965	36.377	-3710.94	CTL	VC2640
Cell_06_0003.ibw	C6	4	-56.8848	35.8887	-3710.94	CTL	VC2640
Cell_06_0004.ibw	C6	4	-56.8848	-53.2227	-146.484	CTL	VC2640
Cell_06_0005.ibw	C6	5	-57.6172	-53.7109	-156.25	CTL	VC2640
Cell_06_0006.ibw	C6	4	-56.8848	-52.4902	-175.781	CTL	VC2640
Cell_06_0007.ibw	C6	3	-57.8613	30.2734	-3525.39	CTL	VC2640
Cell_06_0008.ibw	C6	4	-56.6406	-51.5137	-205.078	CTL	VC2640
Cell_06_0009.ibw	C6	2	-56.8848	-52.2461	-185.547	CTL	VC2640
Cell_06_0010.ibw	C6	4	-57.1289	29.2969	-3457.03	CTL	VC2640
Cell_01_0001.ibw	C1	0	-52.2461	-48.8281	-136.719	shARL13b	VC2640
Cell_01_0002.ibw	C1	0	-53.7109	-51.0254	-107.422	shARL13b	VC2640
Cell_01_0003.ibw	C1	0	-53.4668	-51.5137	-78.125	shARL13b	VC2640
Cell_01_0004.ibw	C1	0	-52.7344	-50.7812	-78.125	shARL13b	VC2640
Cell_01_0005.ibw	C1	0	-52.2461	-41.2598	-439.453	shARL13b	VC2640
Cell_01_0006.ibw	C1	0	-52.002	-41.2598	-429.688	shARL13b	VC2640
Cell_01_0007.ibw	C1	1	-52.2461	-44.9219	-292.969	shARL13b	VC2640
Cell_01_0008.ibw	C1	0	-52.4902	-38.5742	-556.641	shARL13b	VC2640
Cell_01_0009.ibw	C1	1	-52.2461	-50.0488	-87.8906	shARL13b	VC2640
Cell_01_0010.ibw	C1	0	-52.2461	-49.8047	-97.6562	shARL13b	VC2640
Cell_17_0001.ibw	C17	8	-55.4199	-51.2695	-166.016	shARL13b	VC2640
Cell_17_0002.ibw	C17	8	-55.9082	-51.7578	-166.016	shARL13b	VC2640
Cell_17_0003.ibw	C17	11	-56.6406	-52.7344	-156.25	shARL13b	VC2640
Cell_17_0004.ibw	C17	17	-57.6172	-52.2461	-214.844	shARL13b	VC2640
Cell_17_0005.ibw	C17	19	-54.4434	-49.3164	-205.078	shARL13b	VC2640
Cell_17_0006.ibw	C17	15	-54.9316	-49.3164	-224.609	shARL13b	VC2640
Cell_17_0007.ibw	C17	13	-54.9316	-46.875	-322.266	shARL13b	VC2640
Cell_01_0001.ibw	C1	2	-58.5938	-49.0723	-380.859	CTL	VC2641
Cell_01_0002.ibw	C1	3	-58.5938	-50.5371	-322.266	CTL	VC2641
Cell_01_0003.ibw	C1	2	-58.3496	-48.8281	-380.859	CTL	VC2641
Cell_01_0004.ibw	C1	6	-59.8145	-46.875	-517.578	CTL	VC2641
Cell_01_0005.ibw	C1	5	-59.3262	-50.5371	-351.562	CTL	VC2641
Cell_01_0006.ibw	C1	2	-60.3027	-52.002	-332.031	CTL	VC2641
Cell_01_0007.ibw	C1	2	-60.0586	-51.7578	-332.031	CTL	VC2641
Cell_01_0008.ibw	C1	1	-59.082	-50.293	-351.562	CTL	VC2641
Cell_01_0009.ibw	C1	3	-58.1055	-49.3164	-351.562	CTL	VC2641
Cell_01_0010.ibw	C1	4	-59.3262	-51.0254	-332.031	CTL	VC2641
Cell_08_0001.ibw	C8	0	-55.4199	-50.293	-205.078	CTL	VC2641
Cell_08_0002.ibw	C8	0	-56.6406	-51.2695	-214.844	CTL	VC2641
Cell_08_0003.ibw	C8	0	-54.1992	-49.0723	-205.078	CTL	VC2641
Cell_08_0004.ibw	C8	3	-54.1992	-49.3164	-195.312	CTL	VC2641
Cell_08_0005.ibw	C8	0	-50.7812	-44.9219	-234.375	CTL	VC2641
Cell_08_0006.ibw	C8	0	-56.3965	-51.5137	-195.312	CTL	VC2641
Cell_08_0007.ibw	C8	0	-52.7344	-47.3633	-214.844	CTL	VC2641
Cell_08_0008.ibw	C8	0	-53.9551	-45.4102	-341.797	CTL	VC2641
Cell_08_0009.ibw	C8	0	-55.1758	-50.0488	-205.078	CTL	VC2641
Cell_08_0010.ibw	C8	0	-54.1992	-49.3164	-195.312	CTL	VC2641
Cell_09_0001.ibw	C8	0	-54.4434	-47.8516	-263.672	CTL	VC2641
Cell_09_0002.ibw	C8	0	-55.4199	-51.0254	-175.781	CTL	VC2641
Cell_09_0003.ibw	C8	0	-54.9316	-49.8047	-205.078	CTL	VC2641
Cell_09_0004.ibw	C8	0	-54.1992	-49.3164	-195.312	CTL	VC2641
Cell_09_0005.ibw	C8	0	-55.1758	-49.5605	-224.609	CTL	VC2641
Cell_09_0006.ibw	C8	0	-53.9551	-48.3398	-224.609	CTL	VC2641
Cell_09_0007.ibw	C8	0	-55.1758	-49.3164	-234.375	CTL	VC2641
Cell_09_0008.ibw	C8	0	-54.1992	-48.8281	-214.844	CTL	VC2641
Cell_09_0009.ibw	C8	0	-54.4434	-48.3398	-244.141	CTL	VC2641
Cell_09_0010.ibw	C8	2	-54.4434	-48.8281	-224.609	CTL	VC2641
Cell_26_0001.ibw	C26	1	-55.6641	-49.8047	-234.375	CTL	VC2641
Cell_26_0002.ibw	C26	0	-56.3965	-50.293	-244.141	CTL	VC2641
Cell_26_0003.ibw	C26	0	-56.8848	-49.8047	-283.203	CTL	VC2641
Cell_26_0004.ibw	C26	0	-57.373	-50.7812	-263.672	CTL	VC2641
Cell_26_0005.ibw	C26	1	-57.8613	-51.2695	-263.672	CTL	VC2641
Cell_26_0006.ibw	C26	0	-56.3965	-49.8047	-263.672	CTL	VC2641
Cell_26_0007.ibw	C26	0	-56.6406	-49.5605	-283.203	CTL	VC2641
Cell_26_0008.ibw	C26	4	-56.6406	-49.8047	-273.438	CTL	VC2641
Cell_26_0009.ibw	C26	1	-54.6875	-47.8516	-273.438	CTL	VC2641
Cell_26_0010.ibw	C26	0	-54.4434	-48.3398	-244.141	CTL	VC2641
Cell_03_0001.ibw	C3	0	-54.9316	-48.584	-253.906	shARL13b	VC2641
Cell_03_0002.ibw	C3	3	-57.1289	-51.2695	-234.375	shARL13b	VC2641
Cell_03_0003.ibw	C3	2	-56.3965	-51.5137	-195.312	shARL13b	VC2641
Cell_03_0004.ibw	C3	0	-55.9082	-51.0254	-195.312	shARL13b	VC2641
Cell_03_0005.ibw	C3	0	-56.1523	-50.293	-234.375	shARL13b	VC2641
Cell_03_0006.ibw	C3	0	-56.6406	-51.5137	-205.078	shARL13b	VC2641
Cell_03_0007.ibw	C3	1	-55.1758	-49.8047	-214.844	shARL13b	VC2641
Cell_03_0008.ibw	C3	0	-55.1758	-48.8281	-253.906	shARL13b	VC2641
Cell_03_0009.ibw	C3	1	-55.1758	-49.8047	-214.844	shARL13b	VC2641
Cell_03_0010.ibw	C3	0	-55.1758	-50.5371	-185.547	shARL13b	VC2641
Cell_14_0002.ibw	C14	0	-60.3027	-53.9551	-253.906	shARL13b	VC2641
Cell_14_0003.ibw	C14	5	-56.8848	-50.0488	-273.438	shARL13b	VC2641
Cell_14_0004.ibw	C14	0	-57.6172	-51.2695	-253.906	shARL13b	VC2641
Cell_14_0005.ibw	C14	0	-56.3965	-49.0723	-292.969	shARL13b	VC2641
Cell_14_0006.ibw	C14	1	-57.1289	-49.0723	-322.266	shARL13b	VC2641
Cell_14_0007.ibw	C14	0	-57.373	-49.3164	-322.266	shARL13b	VC2641
Cell_14_0008.ibw	C14	1	-57.6172	-48.8281	-351.562	shARL13b	VC2641
Cell_14_0009.ibw	C14	0	-56.8848	-49.3164	-302.734	shARL13b	VC2641
Cell_14_0010.ibw	C14	0	-57.373	-50.5371	-273.438	shARL13b	VC2641
Cell_19_0001.ibw	C19	2	-53.9551	-50.7812	-126.953	shARL13b	VC2641
Cell_19_0002.ibw	C19	1	-52.9785	-50.5371	-97.6562	shARL13b	VC2641
Cell_19_0003.ibw	C19	2	-52.9785	-50.7812	-87.8906	shARL13b	VC2641
Cell_20_0001.ibw	C19	4	-52.002	-49.8047	-87.8906	shARL13b	VC2641
Cell_20_0002.ibw	C19	7	-50.7812	52.002	-4111.33	shARL13b	VC2641
Cell_20_0003.ibw	C19	4	-52.7344	-50.0488	-107.422	shARL13b	VC2641
Cell_20_0004.ibw	C19	6	-52.2461	-38.3301	-556.641	shARL13b	VC2641
Cell_20_0005.ibw	C19	2	-52.2461	-49.3164	-117.188	shARL13b	VC2641
Cell_20_0006.ibw	C19	7	-52.002	-48.8281	-126.953	shARL13b	VC2641
Cell_20_0007.ibw	C19	6	-52.4902	-49.5605	-117.188	shARL13b	VC2641
Cell_20_0008.ibw	C19	5	-52.2461	-49.5605	-107.422	shARL13b	VC2641
Cell_20_0009.ibw	C19	6	-51.7578	-47.8516	-156.25	shARL13b	VC2641
Cell_20_0010.ibw	C19	3	-51.5137	-47.3633	-166.016	shARL13b	VC2641
Cell_23_0001.ibw	C23	1	-58.8379	-52.7344	-244.141	shARL13b	VC2641
Cell_23_0002.ibw	C23	20	-56.3965	-53.9551	-97.6562	shARL13b	VC2641
Cell_23_0003.ibw	C23	6	-57.373	-47.6074	-390.625	shARL13b	VC2641
Cell_23_0004.ibw	C23	0	-58.8379	-55.9082	-117.188	shARL13b	VC2641
Cell_23_0005.ibw	C23	0	-58.5938	-44.1895	-576.172	shARL13b	VC2641
Cell_23_0006.ibw	C23	0	-58.8379	-54.9316	-156.25	shARL13b	VC2641
Cell_23_0007.ibw	C23	0	-58.5938	-51.7578	-273.438	shARL13b	VC2641
Cell_23_0008.ibw	C23	7	-58.3496	-48.584	-390.625	shARL13b	VC2641
Cell_23_0009.ibw	C23	4	-57.8613	-49.3164	-341.797	shARL13b	VC2641
Cell_23_0010.ibw	C23	3	-58.3496	37.5977	-3837.89	shARL13b	VC2641
Cell_24_0001.ibw	C23	1	-58.3496	-49.0723	-371.094	shARL13b	VC2641
Cell_24_0002.ibw	C23	0	-60.5469	-49.8047	-429.688	shARL13b	VC2641
Cell_24_0003.ibw	C23	0	-59.8145	-49.8047	-400.391	shARL13b	VC2641
Cell_24_0004.ibw	C23	0	-57.8613	-49.0723	-351.562	shARL13b	VC2641
Cell_24_0005.ibw	C23	0	-57.373	-49.8047	-302.734	shARL13b	VC2641
Cell_24_0006.ibw	C23	3	-56.6406	-49.0723	-302.734	shARL13b	VC2641
Cell_24_0007.ibw	C23	14	-56.3965	-46.6309	-390.625	shARL13b	VC2641
Cell_24_0008.ibw	C23	0	-56.8848	-46.3867	-419.922	shARL13b	VC2641
Cell_24_0009.ibw	C23	0	-57.1289	-47.3633	-390.625	shARL13b	VC2641
Cell_24_0010.ibw	C23	0	-56.8848	-48.8281	-322.266	shARL13b	VC2641
Cell_01_0001.ibw	C1	1	-57.6172	-51.5137	-244.141	CTL	VC2644
Cell_01_0002.ibw	C1	1	-56.8848	-51.0254	-234.375	CTL	VC2644
Cell_01_0003.ibw	C1	1	-56.6406	-51.0254	-224.609	CTL	VC2644
Cell_01_0004.ibw	C1	3	-57.6172	-50.293	-292.969	CTL	VC2644
Cell_01_0005.ibw	C1	2	-53.7109	-50.7812	-117.188	CTL	VC2644
Cell_01_0006.ibw	C1	3	-54.1992	-50.7812	-136.719	CTL	VC2644
Cell_01_0007.ibw	C1	2	-54.9316	-45.8984	-361.328	CTL	VC2644
Cell_01_0008.ibw	C1	4	-53.9551	-51.2695	-107.422	CTL	VC2644
Cell_01_0009.ibw	C1	5	-60.791	-48.8281	-478.516	CTL	VC2644
Cell_01_0010.ibw	C1	1	-59.8145	-46.875	-517.578	CTL	VC2644
Cell_02_0001.ibw	C2	0	-52.9785	-49.8047	-126.953	CTL	VC2644
Cell_02_0002.ibw	C2	0	-53.4668	-47.6074	-234.375	CTL	VC2644
Cell_02_0003.ibw	C2	0	-53.9551	-51.0254	-117.188	CTL	VC2644
Cell_02_0004.ibw	C2	0	-53.9551	-50.7812	-126.953	CTL	VC2644
Cell_02_0005.ibw	C2	0	-52.7344	-50.293	-97.6562	CTL	VC2644
Cell_02_0006.ibw	C2	0	-54.9316	-51.5137	-136.719	CTL	VC2644
Cell_02_0007.ibw	C2	0	-57.1289	-53.9551	-126.953	CTL	VC2644
Cell_02_0008.ibw	C2	0	-55.9082	-52.7344	-126.953	CTL	VC2644
Cell_02_0009.ibw	C2	0	-53.9551	-50.293	-146.484	CTL	VC2644
Cell_02_0010.ibw	C2	1	-54.4434	-50.7812	-146.484	CTL	VC2644
Cell_04_0001.ibw	C4	0	-52.7344	-49.5605	-126.953	CTL	VC2644
Cell_04_0002.ibw	C4	4	-52.4902	-49.0723	-136.719	CTL	VC2644
Cell_04_0003.ibw	C4	0	-52.4902	-49.0723	-136.719	CTL	VC2644
Cell_04_0004.ibw	C4	0	-52.9785	-49.5605	-136.719	CTL	VC2644
Cell_04_0005.ibw	C4	0	-53.2227	-50.0488	-126.953	CTL	VC2644
Cell_04_0006.ibw	C4	0	-53.2227	-50.293	-117.188	CTL	VC2644
Cell_04_0007.ibw	C4	0	-53.2227	-42.7246	-419.922	CTL	VC2644
Cell_04_0008.ibw	C4	0	-53.9551	-50.5371	-136.719	CTL	VC2644
Cell_04_0009.ibw	C4	0	-53.9551	-50.0488	-156.25	CTL	VC2644
Cell_04_0010.ibw	C4	0	-54.1992	-51.0254	-126.953	CTL	VC2644
Cell_05_0001.ibw	C5	1	-53.9551	-50.7812	-126.953	CTL	VC2644
Cell_05_0002.ibw	C5	1	-52.4902	-48.8281	-146.484	CTL	VC2644
Cell_05_0003.ibw	C5	0	-52.7344	-48.584	-166.016	CTL	VC2644
Cell_05_0004.ibw	C5	1	-0.544434	0.358887	-36.1328	CTL	VC2644
Cell_06_0001.ibw	C5	2	-54.1992	-36.6211	-703.125	CTL	VC2644
Cell_06_0002.ibw	C5	0	-53.7109	-48.584	-205.078	CTL	VC2644
Cell_06_0003.ibw	C5	2	-52.7344	-49.5605	-126.953	CTL	VC2644
Cell_06_0004.ibw	C5	2	-56.8848	-47.1191	-390.625	CTL	VC2644
Cell_06_0005.ibw	C5	2	-52.4902	-47.3633	-205.078	CTL	VC2644
Cell_06_0006.ibw	C5	4	-53.2227	-49.5605	-146.484	CTL	VC2644
Cell_06_0007.ibw	C5	2	-54.6875	-41.5039	-527.344	CTL	VC2644
Cell_06_0008.ibw	C5	3	-52.4902	-49.5605	-117.188	CTL	VC2644
Cell_06_0009.ibw	C5	3	-52.4902	-48.8281	-146.484	CTL	VC2644
Cell_06_0010.ibw	C5	5	-53.2227	-49.5605	-146.484	CTL	VC2644
Cell_09_0001.ibw	C9	2	-54.9316	-50.7812	-166.016	CTL	VC2644
Cell_09_0002.ibw	C9	3	-56.1523	-51.7578	-175.781	CTL	VC2644
Cell_09_0003.ibw	C9	5	-54.9316	-50.5371	-175.781	CTL	VC2644
Cell_09_0004.ibw	C9	1	-54.6875	-50.293	-175.781	CTL	VC2644
Cell_09_0005.ibw	C9	4	-54.6875	-42.7246	-478.516	CTL	VC2644
Cell_09_0006.ibw	C9	4	-54.6875	-50.293	-175.781	CTL	VC2644
Cell_09_0007.ibw	C9	8	-54.9316	-50.7812	-166.016	CTL	VC2644
Cell_09_0008.ibw	C9	5	-54.9316	-50.5371	-175.781	CTL	VC2644
Cell_09_0009.ibw	C9	4	-54.4434	-50.293	-166.016	CTL	VC2644
Cell_09_0010.ibw	C9	7	-53.9551	-49.3164	-185.547	CTL	VC2644
Cell_03_0001.ibw	C3	19	-62.2559	-51.2695	-439.453	shARL13b	VC2644
Cell_03_0002.ibw	C3	15	-62.2559	-47.8516	-576.172	shARL13b	VC2644
Cell_03_0003.ibw	C3	2	-62.5	-51.7578	-429.688	shARL13b	VC2644
Cell_03_0004.ibw	C3	16	-62.7441	-50.5371	-488.281	shARL13b	VC2644
Cell_03_0005.ibw	C3	23	-59.8145	-47.3633	-498.047	shARL13b	VC2644
Cell_03_0006.ibw	C3	10	-61.7676	-50.293	-458.984	shARL13b	VC2644
Cell_03_0007.ibw	C3	9	-62.2559	-52.002	-410.156	shARL13b	VC2644
Cell_03_0008.ibw	C3	9	-60.5469	-51.5137	-361.328	shARL13b	VC2644
Cell_03_0009.ibw	C3	3	-60.791	-45.8984	-595.703	shARL13b	VC2644
Cell_03_0010.ibw	C3	11	-60.5469	-50.293	-410.156	shARL13b	VC2644
Cell_01_0001.ibw	C1	1	-53.9551	-50.5371	-136.719	CTL	VC2646
Cell_01_0002.ibw	C1	0	-53.4668	-50.5371	-117.188	CTL	VC2646
Cell_01_0003.ibw	C1	0	-53.7109	-50.0488	-146.484	CTL	VC2646
Cell_01_0004.ibw	C1	0	-53.7109	-49.8047	-156.25	CTL	VC2646
Cell_01_0005.ibw	C1	0	-54.1992	-49.8047	-175.781	CTL	VC2646
Cell_01_0006.ibw	C1	3	-53.7109	-50.0488	-146.484	CTL	VC2646
Cell_01_0007.ibw	C1	0	-53.4668	-49.8047	-146.484	CTL	VC2646
Cell_01_0008.ibw	C1	0	-54.9316	-51.7578	-126.953	CTL	VC2646
Cell_01_0009.ibw	C1	0	-54.4434	-51.2695	-126.953	CTL	VC2646
Cell_01_0010.ibw	C1	0	-54.6875	-51.5137	-126.953	CTL	VC2646
Cell_03_0001.ibw	C3	0	-56.3965	-52.4902	-156.25	CTL	VC2646
Cell_03_0002.ibw	C3	0	-57.8613	-51.7578	-244.141	CTL	VC2646
Cell_03_0003.ibw	C3	0	-55.9082	-49.5605	-253.906	CTL	VC2646
Cell_03_0004.ibw	C3	1	-55.9082	-49.3164	-263.672	CTL	VC2646
Cell_03_0005.ibw	C3	0	-55.6641	-49.3164	-253.906	CTL	VC2646
Cell_03_0006.ibw	C3	0	-55.4199	-48.8281	-263.672	CTL	VC2646
Cell_03_0007.ibw	C3	0	-55.4199	-48.584	-273.438	CTL	VC2646
Cell_03_0008.ibw	C3	0	-55.6641	-48.584	-283.203	CTL	VC2646
Cell_03_0009.ibw	C3	0	-54.6875	-47.3633	-292.969	CTL	VC2646
Cell_03_0010.ibw	C3	0	-55.6641	-48.3398	-292.969	CTL	VC2646
Cell_08_0001.ibw	C8	5	-55.1758	-50.0488	-205.078	CTL	VC2646
Cell_08_0002.ibw	C8	3	-56.8848	-50.5371	-253.906	CTL	VC2646
Cell_08_0003.ibw	C8	1	-55.9082	-42.9688	-517.578	CTL	VC2646
Cell_08_0004.ibw	C8	6	-55.4199	-50.0488	-214.844	CTL	VC2646
Cell_08_0005.ibw	C8	3	-55.6641	-49.8047	-234.375	CTL	VC2646
Cell_08_0006.ibw	C8	5	-55.4199	-49.8047	-224.609	CTL	VC2646
Cell_08_0007.ibw	C8	1	-55.6641	-50.293	-214.844	CTL	VC2646
Cell_08_0008.ibw	C8	0	-55.1758	-49.0723	-244.141	CTL	VC2646
Cell_08_0009.ibw	C8	4	-55.4199	-50.0488	-214.844	CTL	VC2646
Cell_08_0010.ibw	C8	2	-54.6875	-44.1895	-419.922	CTL	VC2646
Cell_09_0001.ibw	C8	17	-56.6406	-50.0488	-263.672	CTL	VC2646
Cell_09_0002.ibw	C8	4	-56.3965	-50.7812	-224.609	CTL	VC2646
Cell_09_0003.ibw	C8	2	-56.1523	-50.293	-234.375	CTL	VC2646
Cell_09_0004.ibw	C8	0	-55.9082	-49.8047	-244.141	CTL	VC2646
Cell_09_0005.ibw	C8	4	-55.9082	-50.0488	-234.375	CTL	VC2646
Cell_09_0006.ibw	C8	13	-55.9082	-50.0488	-234.375	CTL	VC2646
Cell_09_0007.ibw	C8	8	-55.9082	-50.5371	-214.844	CTL	VC2646
Cell_09_0008.ibw	C8	4	-55.9082	-50.293	-224.609	CTL	VC2646
Cell_09_0009.ibw	C8	3	-54.4434	-48.584	-234.375	CTL	VC2646
Cell_09_0010.ibw	C8	7	-55.4199	-49.3164	-244.141	CTL	VC2646
Cell_04_0001.ibw	C4	3	-54.9316	-48.8281	-244.141	shARL13b	VC2646
Cell_04_0002.ibw	C4	5	-53.2227	-49.8047	-136.719	shARL13b	VC2646
Cell_04_0003.ibw	C4	4	-54.9316	-50.5371	-175.781	shARL13b	VC2646
Cell_04_0004.ibw	C4	0	-54.4434	-51.2695	-126.953	shARL13b	VC2646
Cell_04_0005.ibw	C4	4	-53.7109	-50.293	-136.719	shARL13b	VC2646
Cell_04_0006.ibw	C4	5	-53.2227	-45.166	-322.266	shARL13b	VC2646
Cell_04_0007.ibw	C4	3	-52.002	-48.8281	-126.953	shARL13b	VC2646
Cell_04_0008.ibw	C4	5	-56.8848	-50.7812	-244.141	shARL13b	VC2646
Cell_04_0009.ibw	C4	7	-53.2227	-50.5371	-107.422	shARL13b	VC2646
Cell_04_0010.ibw	C4	2	-52.9785	-48.584	-175.781	shARL13b	VC2646
Cell_05_0001.ibw	C4	3	-54.1992	-50.7812	-136.719	shARL13b	VC2646
Cell_05_0002.ibw	C4	2	-53.2227	-49.3164	-156.25	shARL13b	VC2646
Cell_05_0003.ibw	C4	4	-53.7109	-49.5605	-166.016	shARL13b	VC2646
Cell_05_0004.ibw	C4	5	-53.4668	-49.5605	-156.25	shARL13b	VC2646
Cell_05_0005.ibw	C4	4	-52.7344	-48.8281	-156.25	shARL13b	VC2646
Cell_05_0006.ibw	C4	1	-53.4668	-49.5605	-156.25	shARL13b	VC2646
Cell_05_0007.ibw	C4	2	-53.2227	-49.8047	-136.719	shARL13b	VC2646
Cell_05_0008.ibw	C4	4	-53.9551	-50.293	-146.484	shARL13b	VC2646
Cell_05_0009.ibw	C4	5	-54.9316	22.4609	-3095.7	shARL13b	VC2646
Cell_05_0010.ibw	C4	0	-53.7109	-50.0488	-146.484	shARL13b	VC2646
Cell_06_0001.ibw	C6	1	-55.4199	-51.0254	-175.781	shARL13b	VC2646
Cell_06_0002.ibw	C6	2	-54.6875	-50.7812	-156.25	shARL13b	VC2646
Cell_06_0003.ibw	C6	0	-55.9082	-51.5137	-175.781	shARL13b	VC2646
Cell_06_0004.ibw	C6	0	-54.4434	-49.5605	-195.312	shARL13b	VC2646
Cell_06_0005.ibw	C6	0	-54.4434	-50.293	-166.016	shARL13b	VC2646
Cell_06_0006.ibw	C6	1	-55.1758	-50.293	-195.312	shARL13b	VC2646
Cell_06_0007.ibw	C6	0	-54.9316	-50.7812	-166.016	shARL13b	VC2646
Cell_06_0008.ibw	C6	0	-54.4434	-48.8281	-224.609	shARL13b	VC2646
Cell_06_0009.ibw	C6	0	-54.1992	-50.293	-156.25	shARL13b	VC2646
Cell_06_0010.ibw	C6	0	-54.1992	-49.5605	-185.547	shARL13b	VC2646
Cell_07_0001.ibw	C6	1	-54.9316	-50.0488	-195.312	shARL13b	VC2646
Cell_07_0002.ibw	C6	2	-54.9316	-50.5371	-175.781	shARL13b	VC2646
Cell_07_0003.ibw	C6	0	-55.4199	-50.7812	-185.547	shARL13b	VC2646
Cell_07_0004.ibw	C6	0	-54.9316	-49.5605	-214.844	shARL13b	VC2646
Cell_07_0005.ibw	C6	1	-54.4434	-48.0957	-253.906	shARL13b	VC2646
Cell_07_0006.ibw	C6	2	-53.7109	-48.3398	-214.844	shARL13b	VC2646
Cell_07_0007.ibw	C6	0	-54.4434	-49.3164	-205.078	shARL13b	VC2646
Cell_07_0008.ibw	C6	1	-53.9551	-47.8516	-244.141	shARL13b	VC2646
Cell_07_0009.ibw	C6	2	-53.9551	-49.5605	-175.781	shARL13b	VC2646
Cell_07_0010.ibw	C6	2	-54.6875	-47.6074	-283.203	shARL13b	VC2646
Cell_10_0001.ibw	C10	0	-56.3965	-51.2695	-205.078	shARL13b	VC2646
Cell_10_0002.ibw	C10	2	-56.8848	-51.0254	-234.375	shARL13b	VC2646
Cell_10_0003.ibw	C10	1	-55.4199	26.8555	-3291.02	shARL13b	VC2646
Cell_10_0004.ibw	C10	1	-54.9316	28.0762	-3320.31	shARL13b	VC2646
Cell_10_0005.ibw	C10	1	-55.6641	-49.0723	-263.672	shARL13b	VC2646
Cell_10_0006.ibw	C10	6	-56.6406	-49.8047	-273.438	shARL13b	VC2646
Cell_10_0007.ibw	C10	9	-56.3965	-49.3164	-283.203	shARL13b	VC2646
Cell_10_0008.ibw	C10	11	-57.373	-51.2695	-244.141	shARL13b	VC2646
Cell_10_0009.ibw	C10	1	-57.373	-50.7812	-263.672	shARL13b	VC2646
Cell_10_0010.ibw	C10	0	-56.6406	-50.0488	-263.672	shARL13b	VC2646
Cell_11_0001.ibw	C10	17	-57.1289	-50.7812	-253.906	shARL13b	VC2646
Cell_11_0002.ibw	C10	0	-57.8613	-51.5137	-253.906	shARL13b	VC2646
Cell_11_0003.ibw	C10	5	-57.373	-50.5371	-273.438	shARL13b	VC2646
Cell_11_0004.ibw	C10	13	-57.6172	-50.7812	-273.438	shARL13b	VC2646
Cell_11_0005.ibw	C10	0	-57.6172	-50.293	-292.969	shARL13b	VC2646
Cell_11_0006.ibw	C10	0	-57.6172	-51.0254	-263.672	shARL13b	VC2646
Cell_11_0007.ibw	C10	0	-57.6172	-51.0254	-263.672	shARL13b	VC2646
Cell_11_0008.ibw	C10	2	-57.1289	-50.0488	-283.203	shARL13b	VC2646
Cell_11_0009.ibw	C10	5	-57.6172	-51.0254	-263.672	shARL13b	VC2646
Cell_11_0010.ibw	C10	4	-57.8613	-51.2695	-263.672	shARL13b	VC2646
Cell_05_0001.ibw	C5	9	-55.4199	-50.5371	-195.312	CTL	VC2652
Cell_05_0002.ibw	C5	0	-56.3965	-51.5137	-195.312	CTL	VC2652
Cell_05_0003.ibw	C5	12	-55.9082	-50.293	-224.609	CTL	VC2652
Cell_05_0004.ibw	C5	0	-55.4199	-50.7812	-185.547	CTL	VC2652
Cell_05_0005.ibw	C5	1	-0.551758	-0.493164	-2.34375	CTL	VC2652
Cell_06_0001.ibw	C5	2	-55.4199	-49.5605	-234.375	CTL	VC2652
Cell_06_0002.ibw	C5	2	-55.1758	-49.8047	-214.844	CTL	VC2652
Cell_06_0003.ibw	C5	14	-55.4199	-50.5371	-195.312	CTL	VC2652
Cell_06_0004.ibw	C5	3	-55.4199	-50.293	-205.078	CTL	VC2652
Cell_06_0005.ibw	C5	0	-54.9316	-44.4336	-419.922	CTL	VC2652
Cell_06_0006.ibw	C5	9	-54.6875	-49.3164	-214.844	CTL	VC2652
Cell_06_0007.ibw	C5	1	-55.9082	-50.7812	-205.078	CTL	VC2652
Cell_06_0008.ibw	C5	2	-55.9082	-50.293	-224.609	CTL	VC2652
Cell_06_0009.ibw	C5	0	-55.6641	-50.293	-214.844	CTL	VC2652
Cell_06_0010.ibw	C5	2	-55.6641	-50.0488	-224.609	CTL	VC2652
Cell_09_0001.ibw	C9	2	-54.4434	-50.293	-166.016	CTL	VC2652
Cell_09_0002.ibw	C9	3	-55.9082	-51.2695	-185.547	CTL	VC2652
Cell_09_0003.ibw	C9	1	-54.1992	-49.0723	-205.078	CTL	VC2652
Cell_09_0004.ibw	C9	2	-56.3965	-50.293	-244.141	CTL	VC2652
Cell_09_0005.ibw	C9	2	-55.9082	-51.2695	-185.547	CTL	VC2652
Cell_09_0006.ibw	C9	1	-55.9082	-50.293	-224.609	CTL	VC2652
Cell_09_0007.ibw	C9	2	-55.4199	-50.5371	-195.312	CTL	VC2652
Cell_09_0008.ibw	C9	0	-55.9082	-51.2695	-185.547	CTL	VC2652
Cell_09_0009.ibw	C9	2	-55.9082	-50.293	-224.609	CTL	VC2652
Cell_09_0010.ibw	C9	2	-55.9082	-50.0488	-234.375	CTL	VC2652
Cell_10_0001.ibw	C10	6	-57.6172	-49.0723	-341.797	CTL	VC2652
Cell_10_0002.ibw	C10	4	-58.8379	-51.2695	-302.734	CTL	VC2652
Cell_10_0003.ibw	C10	6	-59.082	-52.002	-283.203	CTL	VC2652
Cell_10_0004.ibw	C10	3	-59.5703	-51.5137	-322.266	CTL	VC2652
Cell_10_0005.ibw	C10	3	-61.0352	-54.4434	-263.672	CTL	VC2652
Cell_10_0006.ibw	C10	2	-60.3027	-52.2461	-322.266	CTL	VC2652
Cell_10_0007.ibw	C10	5	-59.082	-51.2695	-312.5	CTL	VC2652
Cell_10_0008.ibw	C10	3	-59.082	-50.7812	-332.031	CTL	VC2652
Cell_10_0009.ibw	C10	2	-58.8379	-50.0488	-351.562	CTL	VC2652
Cell_10_0010.ibw	C10	5	-58.1055	-50.5371	-302.734	CTL	VC2652
Cell_08_0001.ibw	C8	10	-59.5703	-56.1523	-136.719	shARL13b	VC2652
Cell_08_0002.ibw	C8	21	-57.1289	-52.2461	-195.312	shARL13b	VC2652
Cell_08_0003.ibw	C8	6	-57.6172	-52.002	-224.609	shARL13b	VC2652
Cell_08_0004.ibw	C8	14	-57.373	-49.5605	-312.5	shARL13b	VC2652
Cell_08_0005.ibw	C8	0	-57.6172	-51.7578	-234.375	shARL13b	VC2652
Cell_08_0006.ibw	C8	15	-55.9082	39.3066	-3808.59	shARL13b	VC2652
Cell_08_0007.ibw	C8	5	-53.2227	32.7148	-3437.5	shARL13b	VC2652
Cell_08_0008.ibw	C8	6	-57.373	-50.7812	-263.672	shARL13b	VC2652
Cell_08_0009.ibw	C8	3	-57.6172	-46.6309	-439.453	shARL13b	VC2652
Cell_08_0010.ibw	C8	10	-58.8379	-52.002	-273.438	shARL13b	VC2652
Cell_06_0001.ibw	C6	3	-56.1523	-51.0254	-205.078	CTL	VC2653
Cell_06_0002.ibw	C6	27	-57.1289	-51.5137	-224.609	CTL	VC2653
Cell_06_0003.ibw	C6	1	-57.1289	-49.8047	-292.969	CTL	VC2653
Cell_06_0004.ibw	C6	1	-55.1758	-48.3398	-273.438	CTL	VC2653
Cell_06_0005.ibw	C6	1	-56.3965	-50.293	-244.141	CTL	VC2653
Cell_06_0006.ibw	C6	4	-55.9082	-48.8281	-283.203	CTL	VC2653
Cell_06_0007.ibw	C6	4	-58.3496	-51.5137	-273.438	CTL	VC2653
Cell_06_0008.ibw	C6	2	-58.8379	-53.2227	-224.609	CTL	VC2653
Cell_06_0009.ibw	C6	7	-59.082	-53.2227	-234.375	CTL	VC2653
Cell_06_0010.ibw	C6	1	-59.5703	-53.9551	-224.609	CTL	VC2653
Cell_07_0001.ibw	C6	3	-58.1055	-51.0254	-283.203	CTL	VC2653
Cell_07_0002.ibw	C6	1	-58.5938	-52.9785	-224.609	CTL	VC2653
Cell_07_0003.ibw	C6	1	-57.6172	-50.7812	-273.438	CTL	VC2653
Cell_07_0004.ibw	C6	5	-57.373	-51.0254	-253.906	CTL	VC2653
Cell_07_0005.ibw	C6	5	-58.3496	-52.002	-253.906	CTL	VC2653
Cell_07_0006.ibw	C6	1	-57.8613	-51.5137	-253.906	CTL	VC2653
Cell_07_0007.ibw	C6	3	-56.6406	-49.5605	-283.203	CTL	VC2653
Cell_07_0008.ibw	C6	6	-56.8848	-48.584	-332.031	CTL	VC2653
Cell_07_0009.ibw	C6	3	-55.9082	-46.3867	-380.859	CTL	VC2653
Cell_07_0010.ibw	C6	7	-56.6406	-50.7812	-234.375	CTL	VC2653
Cell_10_0001.ibw	C10	0	-54.1992	-49.0723	-205.078	CTL	VC2653
Cell_10_0002.ibw	C10	0	-54.4434	-48.584	-234.375	CTL	VC2653
Cell_10_0003.ibw	C10	0	-55.1758	-50.293	-195.312	CTL	VC2653
Cell_10_0004.ibw	C10	0	-56.8848	-52.2461	-185.547	CTL	VC2653
Cell_10_0005.ibw	C10	0	-55.9082	-48.8281	-283.203	CTL	VC2653
Cell_10_0006.ibw	C10	0	-54.6875	-49.8047	-195.312	CTL	VC2653
Cell_10_0007.ibw	C10	0	-55.6641	-50.7812	-195.312	CTL	VC2653
Cell_10_0008.ibw	C10	0	-56.1523	-51.5137	-185.547	CTL	VC2653
Cell_10_0009.ibw	C10	0	-57.1289	-51.5137	-224.609	CTL	VC2653
Cell_10_0010.ibw	C10	0	-58.3496	-53.9551	-175.781	CTL	VC2653
Cell_18_0001.ibw	C18	0	-56.1523	-50.293	-234.375	CTL	VC2653
Cell_18_0002.ibw	C18	0	-57.373	-51.0254	-253.906	CTL	VC2653
Cell_18_0003.ibw	C18	1	-55.4199	-50.5371	-195.312	CTL	VC2653
Cell_18_0004.ibw	C18	1	-55.9082	-48.584	-292.969	CTL	VC2653
Cell_18_0005.ibw	C18	0	-56.6406	-49.3164	-292.969	CTL	VC2653
Cell_18_0006.ibw	C18	0	-57.6172	-50.0488	-302.734	CTL	VC2653
Cell_18_0007.ibw	C18	0	-57.6172	-47.8516	-390.625	CTL	VC2653
Cell_18_0008.ibw	C18	0	-56.8848	-52.002	-195.312	CTL	VC2653
Cell_18_0009.ibw	C18	0	-55.6641	-50.5371	-205.078	CTL	VC2653
Cell_18_0010.ibw	C18	0	-57.373	-49.8047	-302.734	CTL	VC2653
Cell_19_0001.ibw	C19	3	-57.373	-53.4668	-156.25	CTL	VC2653
Cell_19_0002.ibw	C19	1	-55.4199	-51.7578	-146.484	CTL	VC2653
Cell_19_0003.ibw	C19	4	-55.1758	-50.5371	-185.547	CTL	VC2653
Cell_19_0004.ibw	C19	3	-55.9082	39.3066	-3808.59	CTL	VC2653
Cell_19_0005.ibw	C19	4	-55.6641	-52.002	-146.484	CTL	VC2653
Cell_19_0006.ibw	C19	5	-55.1758	-51.5137	-146.484	CTL	VC2653
Cell_19_0007.ibw	C19	3	-54.4434	-50.5371	-156.25	CTL	VC2653
Cell_19_0008.ibw	C19	2	-55.4199	-49.3164	-244.141	CTL	VC2653
Cell_19_0009.ibw	C19	4	-55.4199	-51.7578	-146.484	CTL	VC2653
Cell_19_0010.ibw	C19	6	-54.9316	-51.0254	-156.25	CTL	VC2653
Cell_08_0001.ibw	C8	0	-55.6641	-47.3633	-332.031	shARL13b	VC2653
Cell_08_0002.ibw	C8	5	-59.082	30.7617	-3593.75	shARL13b	VC2653
Cell_08_0003.ibw	C8	2	-60.0586	-51.0254	-361.328	shARL13b	VC2653
Cell_08_0004.ibw	C8	1	-59.3262	-49.3164	-400.391	shARL13b	VC2653
Cell_08_0005.ibw	C8	3	-60.3027	-51.7578	-341.797	shARL13b	VC2653
Cell_08_0006.ibw	C8	1	-58.1055	-49.8047	-332.031	shARL13b	VC2653
Cell_08_0007.ibw	C8	1	-60.791	-51.2695	-380.859	shARL13b	VC2653
Cell_08_0008.ibw	C8	2	-60.5469	-51.7578	-351.562	shARL13b	VC2653
Cell_08_0009.ibw	C8	3	-60.791	-51.5137	-371.094	shARL13b	VC2653
Cell_08_0010.ibw	C8	3	-60.5469	-52.2461	-332.031	shARL13b	VC2653
Cell_09_0001.ibw	C8	3	-58.8379	-51.0254	-312.5	shARL13b	VC2653
Cell_09_0002.ibw	C8	1	-59.3262	-51.0254	-332.031	shARL13b	VC2653
Cell_09_0003.ibw	C8	2	-60.791	-51.5137	-371.094	shARL13b	VC2653
Cell_09_0004.ibw	C8	1	-61.0352	-52.7344	-332.031	shARL13b	VC2653
Cell_09_0005.ibw	C8	2	-60.791	-52.002	-351.562	shARL13b	VC2653
Cell_09_0006.ibw	C8	2	-59.8145	-51.2695	-341.797	shARL13b	VC2653
Cell_09_0007.ibw	C8	1	-57.373	-47.6074	-390.625	shARL13b	VC2653
Cell_09_0008.ibw	C8	6	-59.082	-49.3164	-390.625	shARL13b	VC2653
Cell_09_0009.ibw	C8	0	-57.1289	-47.6074	-380.859	shARL13b	VC2653
Cell_09_0010.ibw	C8	1	-57.373	-48.0957	-371.094	shARL13b	VC2653
Cell_12_0001.ibw	C12	1	-55.6641	-50.7812	-195.312	shARL13b	VC2653
Cell_12_0002.ibw	C12	0	-56.3965	-52.002	-175.781	shARL13b	VC2653
Cell_12_0003.ibw	C12	3	-54.1992	-49.5605	-185.547	shARL13b	VC2653
Cell_12_0004.ibw	C12	0	-54.6875	-49.5605	-205.078	shARL13b	VC2653
Cell_12_0005.ibw	C12	0	-54.9316	-49.3164	-224.609	shARL13b	VC2653
Cell_12_0006.ibw	C12	3	-54.9316	-48.8281	-244.141	shARL13b	VC2653
Cell_12_0007.ibw	C12	4	-53.9551	-47.8516	-244.141	shARL13b	VC2653
Cell_12_0008.ibw	C12	4	-55.9082	-49.5605	-253.906	shARL13b	VC2653
Cell_12_0009.ibw	C12	4	-54.9316	-49.5605	-214.844	shARL13b	VC2653
Cell_12_0010.ibw	C12	0	-56.8848	-51.7578	-205.078	shARL13b	VC2653
Cell_13_0001.ibw	c13	0	-54.9316	-48.3398	-263.672	shARL13b	VC2653
Cell_13_0002.ibw	c13	2	-55.6641	-50.293	-214.844	shARL13b	VC2653
Cell_13_0003.ibw	c13	4	-55.1758	-49.3164	-234.375	shARL13b	VC2653
Cell_13_0004.ibw	c13	1	-55.4199	-49.5605	-234.375	shARL13b	VC2653
Cell_13_0005.ibw	c13	2	-55.4199	-49.8047	-224.609	shARL13b	VC2653
Cell_13_0006.ibw	c13	4	-55.4199	42.9688	-3935.55	shARL13b	VC2653
Cell_13_0007.ibw	c13	3	-57.1289	-52.002	-205.078	shARL13b	VC2653
Cell_13_0008.ibw	c13	6	-56.8848	-48.8281	-322.266	shARL13b	VC2653
Cell_13_0009.ibw	c13	2	-56.1523	-46.875	-371.094	shARL13b	VC2653
Cell_13_0010.ibw	c13	3	-56.1523	-50.293	-234.375	shARL13b	VC2653
Cell_20_0001.ibw	C20	10	-57.8613	-51.0254	-273.438	shARL13b	VC2653
Cell_20_0002.ibw	C20	4	-62.0117	-55.1758	-273.438	shARL13b	VC2653
Cell_20_0003.ibw	C20	1	-61.5234	-53.4668	-322.266	shARL13b	VC2653
Cell_20_0004.ibw	C20	9	-58.3496	-50.293	-322.266	shARL13b	VC2653
Cell_20_0005.ibw	C20	5	-59.082	-51.0254	-322.266	shARL13b	VC2653
Cell_20_0006.ibw	C20	10	-59.8145	-51.7578	-322.266	shARL13b	VC2653
Cell_20_0007.ibw	C20	3	-57.1289	33.6914	-3632.81	shARL13b	VC2653
Cell_20_0008.ibw	C20	4	-59.3262	-52.002	-292.969	shARL13b	VC2653
Cell_20_0009.ibw	C20	4	-59.8145	-50.293	-380.859	shARL13b	VC2653
Cell_20_0010.ibw	C20	3	-60.5469	-52.2461	-332.031	shARL13b	VC2653
Cell_21_0001.ibw	C20	10	-59.8145	-51.2695	-341.797	shARL13b	VC2653
Cell_21_0002.ibw	C20	2	-59.5703	-50.0488	-380.859	shARL13b	VC2653
Cell_21_0003.ibw	C20	0	-61.2793	-52.9785	-332.031	shARL13b	VC2653
Cell_21_0004.ibw	C20	0	-61.7676	-53.9551	-312.5	shARL13b	VC2653
Cell_21_0005.ibw	C20	2	-61.0352	-51.5137	-380.859	shARL13b	VC2653
Cell_21_0006.ibw	C20	2	-57.8613	-47.1191	-429.688	shARL13b	VC2653
Cell_21_0007.ibw	C20	6	-59.082	-49.8047	-371.094	shARL13b	VC2653
Cell_21_0008.ibw	C20	1	-59.3262	-50.7812	-341.797	shARL13b	VC2653
Cell_21_0009.ibw	C20	2	-59.3262	-50.293	-361.328	shARL13b	VC2653
Cell_21_0010.ibw	C20	3	-58.5938	-43.2129	-615.234	shARL13b	VC2653
Cell_22_0001.ibw	C22	2	-62.9883	-51.0254	-478.516	shARL13b	VC2653
Cell_22_0002.ibw	C22	4	-63.4766	-55.4199	-322.266	shARL13b	VC2653
Cell_22_0003.ibw	C22	6	-63.4766	-48.584	-595.703	shARL13b	VC2653
Cell_22_0004.ibw	C22	3	-59.5703	-48.0957	-458.984	shARL13b	VC2653
Cell_22_0005.ibw	C22	5	-61.0352	22.2168	-3330.08	shARL13b	VC2653
Cell_22_0006.ibw	C22	4	-62.2559	-54.6875	-302.734	shARL13b	VC2653
Cell_22_0007.ibw	C22	6	-60.5469	-41.5039	-761.719	shARL13b	VC2653
Cell_22_0008.ibw	C22	4	-59.5703	-46.6309	-517.578	shARL13b	VC2653
Cell_22_0009.ibw	C22	9	-60.791	-46.6309	-566.406	shARL13b	VC2653
Cell_22_0010.ibw	C22	3	-61.2793	-52.7344	-341.797	shARL13b	VC2653

## Sheet: Figure_4B
Cell	Record	Treatment	STEP	AVG_FR	Dissociation
Cell_01	01.ibw	CTL	100	23.8363	VC2886
Cell_01	03.ibw	CTL	30	0	VC2886
Cell_01	05.ibw	CTL	200	62.7042	VC2886
Cell_01	09.ibw	CTL	50	0	VC2886
Cell_01	11.ibw	CTL	300	80.3886	VC2886
Cell_02	01.ibw	CTL	100	16.8803	VC2886
Cell_02	03.ibw	CTL	30	0	VC2886
Cell_02	05.ibw	CTL	200	55.7599	VC2886
Cell_02	09.ibw	CTL	50	0	VC2886
Cell_02	11.ibw	CTL	300	74.797	VC2886
Cell_04	01.ibw	shARL13b_1	100	15.5463	VC2886
Cell_04	03.ibw	shARL13b_1	30	0	VC2886
Cell_04	05.ibw	shARL13b_1	200	38.2196	VC2886
Cell_04	09.ibw	shARL13b_1	50	0	VC2886
Cell_04	11.ibw	shARL13b_1	300	50.6277	VC2886
Cell_05	01.ibw	CTL	100	55.9222	VC2886
Cell_05	03.ibw	CTL	30	11.1099	VC2886
Cell_05	05.ibw	CTL	200	86.1442	VC2886
Cell_05	09.ibw	CTL	50	18.6805	VC2886
Cell_05	11.ibw	CTL	300	103.74	VC2886
Cell_07	01.ibw	CTL	100	35.5893	VC2886
Cell_07	03.ibw	CTL	30	0	VC2886
Cell_07	05.ibw	CTL	200	66.3772	VC2886
Cell_07	09.ibw	CTL	50	0	VC2886
Cell_07	11.ibw	CTL	300	85.3549	VC2886
Cell_09	01.ibw	shARL13b_1	100	21.0477	VC2886
Cell_09	03.ibw	shARL13b_1	30	0	VC2886
Cell_09	05.ibw	shARL13b_1	200	60.4058	VC2886
Cell_09	09.ibw	shARL13b_1	50	0	VC2886
Cell_09	11.ibw	shARL13b_1	300	77.9155	VC2886
Cell_11	01.ibw	shARL13b_1	100	28.5543	VC2886
Cell_11	03.ibw	shARL13b_1	30	0	VC2886
Cell_12	01.ibw	shARL13b_1	100	39.8085	VC2886
Cell_12	03.ibw	shARL13b_1	30	5.15631	VC2886
Cell_12	05.ibw	shARL13b_1	200	55.9645	VC2886
Cell_12	09.ibw	shARL13b_1	50	15.7604	VC2886
Cell_12	11.ibw	shARL13b_1	300	69.4738	VC2886
Cell_13	01.ibw	shARL13b_1	100	82.8035	VC2886
Cell_13	03.ibw	shARL13b_1	30	0	VC2886
Cell_13	05.ibw	shARL13b_1	200	109.708	VC2886
Cell_13	09.ibw	shARL13b_1	50	8.32165	VC2886
Cell_13	11.ibw	shARL13b_1	300	120.426	VC2886
Cell_15	10.ibw	shARL13b_1	100	29.378	VC2886
Cell_15	12.ibw	shARL13b_1	30	0	VC2886
Cell_15	14.ibw	shARL13b_1	200	61.2637	VC2886
Cell_15	18.ibw	shARL13b_1	50	0	VC2886
Cell_15	20.ibw	shARL13b_1	300	81.6032	VC2886
Cell_17	01.ibw	CTL	100	36.6878	VC2886
Cell_17	03.ibw	CTL	30	0	VC2886
Cell_17	05.ibw	CTL	200	64.6036	VC2886
Cell_17	09.ibw	CTL	50	7.40995	VC2886
Cell_17	11.ibw	CTL	300	82.2949	VC2886
Cell_18	01.ibw	CTL	100	42.2285	VC2886
Cell_18	03.ibw	CTL	30	0	VC2886
Cell_18	05.ibw	CTL	200	59.6678	VC2886
Cell_18	09.ibw	CTL	50	14.5332	VC2886
Cell_18	11.ibw	CTL	300	72.3942	VC2886
Cell_01	01.ibw	shARL13b_1	100	44.5734	VC2887
Cell_01	03.ibw	shARL13b_1	30	0	VC2887
Cell_01	05.ibw	shARL13b_1	200	75.6108	VC2887
Cell_01	07.ibw	shARL13b_1	400	103.792	VC2887
Cell_01	09.ibw	shARL13b_1	50	0	VC2887
Cell_01	11.ibw	shARL13b_1	300	91.8896	VC2887
Cell_04	01.ibw	CTL	100	31.0636	VC2887
Cell_04	03.ibw	CTL	30	0	VC2887
Cell_04	05.ibw	CTL	200	58.4279	VC2887
Cell_04	07.ibw	CTL	400	94.6896	VC2887
Cell_04	09.ibw	CTL	50	0	VC2887
Cell_04	11.ibw	CTL	300	76.4495	VC2887
Cell_05	01.ibw	CTL	100	20.7935	VC2887
Cell_05	03.ibw	CTL	30	0	VC2887
Cell_05	05.ibw	CTL	200	43.6806	VC2887
Cell_05	07.ibw	CTL	400	68.9271	VC2887
Cell_05	09.ibw	CTL	50	0	VC2887
Cell_05	11.ibw	CTL	300	57.2076	VC2887
Cell_06	01.ibw	shARL13b_1	100	53.5117	VC2887
Cell_06	03.ibw	shARL13b_1	30	19.3135	VC2887
Cell_06	05.ibw	shARL13b_1	200	69.61	VC2887
Cell_06	07.ibw	shARL13b_1	400	90.5172	VC2887
Cell_06	09.ibw	shARL13b_1	50	27.3121	VC2887
Cell_06	11.ibw	shARL13b_1	300	80.7227	VC2887
Cell_08	01.ibw	CTL	100	22.453	VC2887
Cell_08	03.ibw	CTL	30	0	VC2887
Cell_08	05.ibw	CTL	200	59.6053	VC2887
Cell_08	07.ibw	CTL	400	93.4521	VC2887
Cell_08	09.ibw	CTL	50	0	VC2887
Cell_08	11.ibw	CTL	300	70.1844	VC2887
Cell_09	01.ibw	shARL13b_1	100	36.6694	VC2887
Cell_09	03.ibw	shARL13b_1	30	0	VC2887
Cell_09	05.ibw	shARL13b_1	200	60.5419	VC2887
Cell_09	07.ibw	shARL13b_1	400	92.658	VC2887
Cell_09	09.ibw	shARL13b_1	50	0	VC2887
Cell_09	11.ibw	shARL13b_1	300	73.9388	VC2887
Cell_10	01.ibw	shARL13b_1	100	31.07	VC2887
Cell_10	03.ibw	shARL13b_1	30	0	VC2887
Cell_10	05.ibw	shARL13b_1	200	57.7674	VC2887
Cell_10	07.ibw	shARL13b_1	400	84.3989	VC2887
Cell_10	09.ibw	shARL13b_1	50	0	VC2887
Cell_10	11.ibw	shARL13b_1	300	68.3709	VC2887
Cell_11	01.ibw	shARL13b_1	100	29.4096	VC2887
Cell_11	03.ibw	shARL13b_1	30	0	VC2887
Cell_11	05.ibw	shARL13b_1	200	55.848	VC2887
Cell_11	07.ibw	shARL13b_1	400	81.9914	VC2887
Cell_11	09.ibw	shARL13b_1	50	0	VC2887
Cell_11	11.ibw	shARL13b_1	300	70.4643	VC2887
Cell_12	01.ibw	shARL13b_1	100	43.005	VC2887
Cell_12	03.ibw	shARL13b_1	30	0	VC2887
Cell_12	05.ibw	shARL13b_1	200	65.8183	VC2887
Cell_12	07.ibw	shARL13b_1	400	81.6925	VC2887
Cell_12	09.ibw	shARL13b_1	50	0	VC2887
Cell_12	11.ibw	shARL13b_1	300	74.3503	VC2887
Cell_14	01.ibw	CTL	100	24.7284	VC2887
Cell_14	03.ibw	CTL	30	0	VC2887
Cell_14	05.ibw	CTL	200	52.7172	VC2887
Cell_14	07.ibw	CTL	400	81.0306	VC2887
Cell_14	09.ibw	CTL	50	0	VC2887
Cell_14	11.ibw	CTL	300	64.0468	VC2887
Cell_15	01.ibw	CTL	100	36.7002	VC2887
Cell_15	03.ibw	CTL	30	0	VC2887
Cell_15	05.ibw	CTL	200	67.1648	VC2887
Cell_15	07.ibw	CTL	400	97.0411	VC2887
Cell_15	09.ibw	CTL	50	0	VC2887
Cell_15	11.ibw	CTL	300	78.2903	VC2887
Cell_19	01.ibw	CTL	100	53.7009	VC2887
Cell_19	03.ibw	CTL	30	1.6198	VC2887
Cell_19	05.ibw	CTL	200	75.4157	VC2887
Cell_19	07.ibw	CTL	400	102.267	VC2887
Cell_19	09.ibw	CTL	50	18.3358	VC2887
Cell_19	11.ibw	CTL	300	87.3652	VC2887
Cell_02	01.ibw	CTL	100	31.0267	VC2888
Cell_02	05.ibw	CTL	200	51.8148	VC2888
Cell_02	09.ibw	CTL	50	0	VC2888
Cell_02	11.ibw	CTL	300	65.8345	VC2888
Cell_02	15.ibw	CTL	400	75.064	VC2888
Cell_02	17.ibw	CTL	30	0	VC2888
Cell_03	01.ibw	CTL	100	44.6637	VC2888
Cell_03	05.ibw	CTL	200	60.6608	VC2888
Cell_03	09.ibw	CTL	50	0	VC2888
Cell_03	11.ibw	CTL	300	72.2509	VC2888
Cell_03	15.ibw	CTL	400	82.3618	VC2888
Cell_03	17.ibw	CTL	30	0	VC2888
Cell_04	01.ibw	shARL13b_1	100	29.8506	VC2888
Cell_05	01.ibw	shARL13b_1	100	44.2104	VC2888
Cell_05	05.ibw	shARL13b_1	200	79.9065	VC2888
Cell_05	09.ibw	shARL13b_1	50	16.9516	VC2888
Cell_05	11.ibw	shARL13b_1	300	100.623	VC2888
Cell_06	01.ibw	shARL13b_1	100	33.6248	VC2888
Cell_06	05.ibw	shARL13b_1	200	56.5931	VC2888
Cell_06	09.ibw	shARL13b_1	50	7.88924	VC2888
Cell_06	11.ibw	shARL13b_1	300	70.5986	VC2888
Cell_06	15.ibw	shARL13b_1	400	80.3848	VC2888
Cell_07	01.ibw	shARL13b_1	100	44.327	VC2888
Cell_07	05.ibw	shARL13b_1	200	65.5544	VC2888
Cell_07	09.ibw	shARL13b_1	50	0	VC2888
Cell_07	11.ibw	shARL13b_1	300	78.742	VC2888
Cell_07	15.ibw	shARL13b_1	400	88.8284	VC2888
Cell_07	17.ibw	shARL13b_1	30	0	VC2888
Cell_08	01.ibw	shARL13b_1	100	27.1336	VC2888
Cell_08	05.ibw	shARL13b_1	200	51.7946	VC2888
Cell_08	09.ibw	shARL13b_1	50	0	VC2888
Cell_08	11.ibw	shARL13b_1	300	63.9964	VC2888
Cell_08	15.ibw	shARL13b_1	400	74.2366	VC2888
Cell_08	17.ibw	shARL13b_1	30	0	VC2888
Cell_09	01.ibw	CTL	100	44.3678	VC2888
Cell_09	05.ibw	CTL	200	55.9926	VC2888
Cell_09	09.ibw	CTL	50	0	VC2888
Cell_09	11.ibw	CTL	300	65.0436	VC2888
Cell_09	15.ibw	CTL	400	71.7218	VC2888
Cell_09	17.ibw	CTL	30	0	VC2888
Cell_10	01.ibw	shARL13b_1	100	41.9661	VC2888
Cell_10	05.ibw	shARL13b_1	200	56.0824	VC2888
Cell_10	09.ibw	shARL13b_1	50	0	VC2888
Cell_10	11.ibw	shARL13b_1	300	68.1485	VC2888
Cell_10	15.ibw	shARL13b_1	400	74.9897	VC2888
Cell_10	17.ibw	shARL13b_1	30	0	VC2888
Cell_11	01.ibw	shARL13b_1	100	34.523	VC2888
Cell_11	05.ibw	shARL13b_1	200	53.0878	VC2888
Cell_11	09.ibw	shARL13b_1	50	0	VC2888
Cell_11	11.ibw	shARL13b_1	300	66.951	VC2888
Cell_11	15.ibw	shARL13b_1	400	75.7933	VC2888
Cell_11	17.ibw	shARL13b_1	30	0	VC2888
Cell_12	01.ibw	shARL13b_1	100	41.0925	VC2888
Cell_12	05.ibw	shARL13b_1	200	59.7135	VC2888
Cell_12	09.ibw	shARL13b_1	50	13.2627	VC2888
Cell_12	11.ibw	shARL13b_1	300	72.4022	VC2888
Cell_12	15.ibw	shARL13b_1	400	85.8906	VC2888
Cell_12	17.ibw	shARL13b_1	30	0	VC2888
Cell_13	01.ibw	CTL	100	33.5564	VC2888
Cell_13	05.ibw	CTL	200	54.9831	VC2888
Cell_13	09.ibw	CTL	50	0	VC2888
Cell_13	11.ibw	CTL	300	70.5301	VC2888
Cell_13	15.ibw	CTL	400	80.7776	VC2888
Cell_13	17.ibw	CTL	30	0	VC2888
Cell_14	01.ibw	CTL	100	36.2805	VC2888
Cell_14	05.ibw	CTL	200	57.234	VC2888
Cell_14	09.ibw	CTL	50	11.4746	VC2888
Cell_14	11.ibw	CTL	300	70.3605	VC2888
Cell_14	15.ibw	CTL	400	79.5779	VC2888
Cell_14	17.ibw	CTL	30	3.89758	VC2888
Cell_15	01.ibw	CTL	100	33.162	VC2888
Cell_15	05.ibw	CTL	200	48.4063	VC2888
Cell_15	09.ibw	CTL	50	0	VC2888
Cell_15	11.ibw	CTL	300	59.3753	VC2888
Cell_15	15.ibw	CTL	400	69.1909	VC2888
Cell_15	17.ibw	CTL	30	0	VC2888
