# Supplementary material for: Ciliary neuropeptidergic signaling dynamically regulates excitatory synapses in postnatal neocortical pyramidal neurons
Source: eLife. 2021 Mar 2;10:e65427. doi: 10.7554/eLife.65427 (PMC7952091; doi:10.7554/eLife.65427)
Supplement: Figure 5—figure supplement 1—source data 1. [file elife-65427-fig5-figsupp1-data1.xlsx]

## Sheet: SuppFig5B
Layer	Experiment	Fraction	Marker	SSTR3					Summary	Layer	Marker	SSTR3	Fraction
L2_3	AG300	0.933333	GAD67	neg						L2_3	neg	GAD67	0.944968		Layer
L2_3	S47	0.909091	GAD67	neg						L2_3	neg	NeuN	0.0325729
L2_3	S49	1	GAD67	neg						L2_3	pos	GAD67	0.0550325		1
L2_3	S50	0.875	GAD67	neg						L2_3	pos	NeuN	0.967427		2
L2_3	S51	1	GAD67	neg						L4	neg	GAD67	0.945833		3
L2_3	S52	0.952381	GAD67	neg						L4	neg	NeuN	0.0217232		4
L2_3	AG300	0.0337079	NeuN	neg						L4	pos	GAD67	0.0541667		5
L2_3	S47	0.0210526	NeuN	neg						L4	pos	NeuN	0.978277		6
L2_3	S49	0	NeuN	neg						L5	neg	GAD67	0.95625		7
L2_3	S50	0.0196078	NeuN	neg						L5	neg	NeuN	0.178259		8
L2_3	S51	0.0833333	NeuN	neg						L5	pos	GAD67	0.04375		9
L2_3	S52	0.0377358	NeuN	neg						L5	pos	NeuN	0.821741		10
L2_3	AG300	0.0666667	GAD67	pos						L6	neg	GAD67	0.945833		11
L2_3	S47	0.0909091	GAD67	pos						L6	neg	NeuN	0.0694584		12
L2_3	S49	0	GAD67	pos						L6	pos	GAD67	0.0541667		13
L2_3	S50	0.125	GAD67	pos						L6	pos	NeuN	0.930542		14
L2_3	S51	0	GAD67	pos											15
L2_3	S52	0.047619	GAD67	pos											16
L2_3	AG300	0.966292	NeuN	pos
L2_3	S47	0.978947	NeuN	pos
L2_3	S49	1	NeuN	pos
L2_3	S50	0.980392	NeuN	pos
L2_3	S51	0.916667	NeuN	pos
L2_3	S52	0.962264	NeuN	pos
L4	AG300	0.8	GAD67	neg
L4	S47	0.875	GAD67	neg
L4	S49	1	GAD67	neg
L4	S50	1	GAD67	neg
L4	S51	1	GAD67	neg
L4	S52	1	GAD67	neg
L4	AG300	0.0147059	NeuN	neg
L4	S47	0.0280374	NeuN	neg
L4	S49	0	NeuN	neg
L4	S50	0	NeuN	neg
L4	S51	0.0434783	NeuN	neg
L4	S52	0.0441176	NeuN	neg
L4	AG300	0.2	GAD67	pos
L4	S47	0.125	GAD67	pos
L4	S49	0	GAD67	pos
L4	S50	0	GAD67	pos
L4	S51	0	GAD67	pos
L4	S52	0	GAD67	pos
L4	AG300	0.985294	NeuN	pos
L4	S47	0.971963	NeuN	pos
L4	S49	1	NeuN	pos
L4	S50	1	NeuN	pos
L4	S51	0.956522	NeuN	pos
L4	S52	0.955882	NeuN	pos
L5	AG300	1	GAD67	neg
L5	S47	0.9375	GAD67	neg
L5	S49	1	GAD67	neg
L5	S50	0.8	GAD67	neg
L5	S51	1	GAD67	neg
L5	S52	1	GAD67	neg
L5	AG300	0.166667	NeuN	neg
L5	S47	0.343137	NeuN	neg
L5	S49	0.0606061	NeuN	neg
L5	S50	0.0769231	NeuN	neg
L5	S51	0.222222	NeuN	neg
L5	S52	0.2	NeuN	neg
L5	AG300	0	GAD67	pos
L5	S47	0.0625	GAD67	pos
L5	S49	0	GAD67	pos
L5	S50	0.2	GAD67	pos
L5	S51	0	GAD67	pos
L5	S52	0	GAD67	pos
L5	AG300	0.833333	NeuN	pos
L5	S47	0.656863	NeuN	pos
L5	S49	0.939394	NeuN	pos
L5	S50	0.923077	NeuN	pos
L5	S51	0.777778	NeuN	pos
L5	S52	0.8	NeuN	pos
L6	AG300	1	GAD67	neg
L6	S47	1	GAD67	neg
L6	S49	0.875	GAD67	neg
L6	S50	1	GAD67	neg
L6	S51	1	GAD67	neg
L6	S52	0.8	GAD67	neg
L6	AG300	0.153846	NeuN	neg
L6	S47	0.0357143	NeuN	neg
L6	S49	0.0352941	NeuN	neg
L6	S50	0.0517241	NeuN	neg
L6	S51	0.0789474	NeuN	neg
L6	S52	0.0612245	NeuN	neg
L6	AG300	0	GAD67	pos
L6	S47	0	GAD67	pos
L6	S49	0.125	GAD67	pos
L6	S50	0	GAD67	pos
L6	S51	0	GAD67	pos
L6	S52	0.2	GAD67	pos
L6	AG300	0.846154	NeuN	pos
L6	S47	0.964286	NeuN	pos
L6	S49	0.964706	NeuN	pos
L6	S50	0.948276	NeuN	pos
L6	S51	0.921053	NeuN	pos
L6	S52	0.938776	NeuN	pos
