# Supplementary material for: Ciliary neuropeptidergic signaling dynamically regulates excitatory synapses in postnatal neocortical pyramidal neurons
Source: eLife. 2021 Mar 2;10:e65427. doi: 10.7554/eLife.65427 (PMC7952091; doi:10.7554/eLife.65427)
Supplement: Figure 5—source data 1. [file elife-65427-fig5-data1.xlsx]

## Sheet: Figure_5B
Layer	SSTR3	Fraction
L2_3	pos	0.974596
L2_3	neg	0.0254039
L4	pos	1
L4	neg	0
L5_6	pos	0.955728
L5_6	neg	0.0442718

## Sheet: Figure_5D
Subtype	SSTR3	Fraction
ChAT	SSTR3+	0
ChAT	SSTR3-	1
VIP	SSTR3+	0
VIP	SSTR3-	1
PV	SSTR3+	0.02
PV	SSTR3-	0.98
SOM	SSTR3+	0.0181818
SOM	SSTR3-	0.981818
GAD67	SSTR3+	0.05
GAD67	SSTR3-	0.95

## Sheet: Figure_5F
SSTR3	Percent
SSTR3+	34.8573
SSTR3+GAD+	1.27568
