# Supplementary material for: Ciliary neuropeptidergic signaling dynamically regulates excitatory synapses in postnatal neocortical pyramidal neurons
Source: eLife. 2021 Mar 2;10:e65427. doi: 10.7554/eLife.65427 (PMC7952091; doi:10.7554/eLife.65427)
Supplement: Figure 6—source data 1. [file elife-65427-fig6-data1.xlsx]

## Sheet: Figure_6B
Image.Name	Minute	Summary.Statistic	Area	Average.intensity	Total.intensity	Image	Overlay	NormAvgAVG	NormAvgTOT	Dissociation	SLIDE	Time	Label
Red	40	Average	0.0679175	11205.1	115750	Copy of Image 13_Maximum intensity projection.tif	GRB_R	0.860815	0.892561	VC2769	VC2769_S1	24H	CTL
Red	44	Average	0.0636174	13209.7	113085	Copy of Image 21_maybenosstr3_Maximum intensity projection.tif	GRB_R	1.01481	0.872014	VC2769	VC2769_S2	24H	CTL
Red	51	Average	0.076055	14635.8	160214	Copy of Image 26_Maximum intensity projection.tif	GRB_R	1.12437	1.23542	VC2769	VC2769_S3	24H	CTL
Blue	40	Average	0.0679175	8757.09	83501.7	Copy of Image 13_Maximum intensity projection.tif	GRB_B	0.902248	0.841894	VC2769	VC2769_S1	24H	CTL
Blue	44	Average	0.0636174	12299.9	122889	Copy of Image 21_maybenosstr3_Maximum intensity projection.tif	GRB_B	1.26726	1.23902	VC2769	VC2769_S2	24H	CTL
Blue	51	Average	0.076055	8060.64	91158.3	Copy of Image 26_Maximum intensity projection.tif	GRB_B	0.830492	0.919091	VC2769	VC2769_S3	24H	CTL
Red	53	Average	0.0620993	12524.4	108374	Copy of Image 10_Maximum intensity projection.tif	GRB_R	0.962167	0.835682	VC2769	VC2769_S5	24H	MK_0125
Red	58	Average	0.0892778	17439.1	232296	Copy of Image 20_Maximum intensity projection.tif	GRB_R	1.33973	1.79126	VC2769	VC2769_S6	24H	MK_0125
Red	0	Average	0.0853583	14658	173599	Copy of Image 6_Maximum intensity projection.tif	GRB_R	1.12608	1.33864	VC2769	VC2769_S4	24H	MK_0125
Blue	53	Average	0.0620993	8548.58	77615	Copy of Image 10_Maximum intensity projection.tif	GRB_B	0.880765	0.782542	VC2769	VC2769_S5	24H	MK_0125
Blue	58	Average	0.0892778	17924.6	273394	Copy of Image 20_Maximum intensity projection.tif	GRB_B	1.84678	2.75645	VC2769	VC2769_S6	24H	MK_0125
Blue	0	Average	0.0853583	19108.7	216926	Copy of Image 6_Maximum intensity projection.tif	GRB_B	1.96878	2.18712	VC2769	VC2769_S4	24H	MK_0125
Red	358	Average	0.104967	22282.6	368244	Copy of ctl1.tif	GRB_R	1.10624	1.15367	VC2778	VC2778_S1	24H	CTL
Red	1	Average	0.119178	19242.6	342734	Copy of CTL2.tif	GRB_R	0.955314	1.07375	VC2778	VC2778_S1	24H	CTL
Red	794	Average	0.109279	23165.9	382143	Copy of CTL3.tif	GRB_R	1.15009	1.19722	VC2778	VC2778_S2	24H	CTL
Red	555	Average	0.0838011	17090.1	203926	Copy of ctl4.tif	GRB_R	0.848454	0.638882	VC2778	VC2778_S2	24H	CTL
Red	533	Average	0.104718	18932.1	298917	Copy of CTL6.tif	GRB_R	0.9399	0.936477	VC2778	VC2778_S2	24H	CTL
Red	884	Average	0.117086	27165.4	474005	Copy of MK1.tif	GRB_R	1.34865	1.48501	VC2778	VC2778_S3	24H	MK_05
Red	607	Average	0.0837736	18159.8	213215	Copy of MK2.tif	GRB_R	0.90156	0.667981	VC2778	VC2778_S3	24H	MK_05
Red	867	Average	0.107156	23132	361785	Copy of mk3.tif	GRB_R	1.14841	1.13344	VC2778	VC2778_S4	24H	MK_05
Red	251	Average	0.11424	19375.3	334925	Copy of mk4.tif	GRB_R	0.961904	1.04929	VC2778	VC2778_S4	24H	MK_05
Red	269	Average	0.12395	26748.1	518509	Copy of MK5.tif	GRB_R	1.32793	1.62444	VC2778	VC2778_S5	24H	MK_05
Blue	408	Average	0.104967	14493.4	244404	Copy of ctl1.tif	GRB_B	0.889189	0.904242	VC2778	VC2778_S1	24H	CTL
Blue	61	Average	0.119178	16883.3	348979	Copy of CTL2.tif	GRB_B	1.03581	1.29115	VC2778	VC2778_S1	24H	CTL
Blue	854	Average	0.109279	16197.8	260517	Copy of CTL3.tif	GRB_B	0.993754	0.963858	VC2778	VC2778_S2	24H	CTL
Blue	615	Average	0.0838011	18222.1	234932	Copy of ctl4.tif	GRB_B	1.11795	0.869199	VC2778	VC2778_S2	24H	CTL
Blue	583	Average	0.104718	15701.4	262596	Copy of CTL6.tif	GRB_B	0.963301	0.97155	VC2778	VC2778_S2	24H	CTL
Blue	934	Average	0.117086	23247.8	416673	Copy of MK1.tif	GRB_B	1.42628	1.5416	VC2778	VC2778_S3	24H	MK_05
Blue	657	Average	0.0837736	14618.9	176226	Copy of MK2.tif	GRB_B	0.896885	0.651998	VC2778	VC2778_S3	24H	MK_05
Blue	947	Average	0.107156	15126.6	233284	Copy of mk3.tif	GRB_B	0.928037	0.863103	VC2778	VC2778_S4	24H	MK_05
Blue	301	Average	0.11424	16579.5	303014	Copy of mk4.tif	GRB_B	1.01717	1.12109	VC2778	VC2778_S4	24H	MK_05
Blue	319	Average	0.12395	17328	340559	Copy of MK5.tif	GRB_B	1.0631	1.26	VC2778	VC2778_S5	24H	MK_05
Red	32	Average	0.0551635	17328.6	144164	Image_12.tif	GRB_R	0.989594	0.942605	VC2780	VC2780_S5	24H	CTL
Red	35	Average	0.0546512	17198.2	142593	Image_13.tif	GRB_R	0.982147	0.932337	VC2780	VC2780_S5	24H	CTL
Red	55	Average	0.0548197	15728	126602	Image_29_2.tif	GRB_R	0.898186	0.827782	VC2780	VC2780_S1	24H	CTL
Red	58	Average	0.049979	16072.9	127700	Image_30_2.tif	GRB_R	0.917882	0.83496	VC2780	VC2780_S1	24H	CTL
Red	0	Average	0.0772497	20455	255807	Image_32.tif	GRB_R	1.16813	1.67258	VC2780	VC2780_S1	24H	CTL
Red	1	Average	0.0710282	21263.2	231269	Image_34.tif	GRB_R	1.21429	1.51214	VC2780	VC2780_S1	24H	CTL
Red	7	Average	0.0556474	15855.7	137053	Image_39_2.tif	GRB_R	0.905478	0.896115	VC2780	VC2780_S2	24H	CTL
Red	9	Average	0.0458184	17212.5	112695	Image_42_2.tif	GRB_R	0.982961	0.736851	VC2780	VC2780_S2	24H	CTL
Red	11	Average	0.0452783	16515.3	106857	Image_43_2.tif	GRB_R	0.943147	0.698681	VC2780	VC2780_S2	24H	CTL
Red	39	Average	0.0580669	17479	144675	Image_4.tif	GRB_R	0.998182	0.94595	VC2780	VC2780_S3	24H	CTL
Blue	32	Average	0.0551635	12148.4	94517.3	Image_12.tif	GRB_B	0.836972	0.779983	VC2780	VC2780_S5	24H	CTL
Blue	35	Average	0.0546512	14479.3	112087	Image_13.tif	GRB_B	0.997562	0.924977	VC2780	VC2780_S5	24H	CTL
Blue	55	Average	0.0548197	13622.2	101700	Image_29_2.tif	GRB_B	0.938509	0.839257	VC2780	VC2780_S1	24H	CTL
Blue	58	Average	0.049979	18861.7	133923	Image_30_2.tif	GRB_B	1.29949	1.10517	VC2780	VC2780_S1	24H	CTL
Blue	0	Average	0.0772497	10918.5	133695	Image_32.tif	GRB_B	0.752235	1.10329	VC2780	VC2780_S1	24H	CTL
Blue	1	Average	0.0710282	19897.6	201263	Image_34.tif	GRB_B	1.37086	1.66088	VC2780	VC2780_S1	24H	CTL
Blue	7	Average	0.0556474	11845.7	99675.9	Image_39_2.tif	GRB_B	0.816119	0.822554	VC2780	VC2780_S2	24H	CTL
Blue	9	Average	0.0458184	10654.6	73854.2	Image_42_2.tif	GRB_B	0.734059	0.609466	VC2780	VC2780_S2	24H	CTL
Blue	11	Average	0.0452783	14790.4	109746	Image_43_2.tif	GRB_B	1.019	0.905658	VC2780	VC2780_S2	24H	CTL
Blue	39	Average	0.0580669	17928.4	151323	Image_4.tif	GRB_B	1.23519	1.24876	VC2780	VC2780_S3	24H	CTL
Red	17	Average	0.100123	24132.9	371245	Image_13_MK.tif	GRB_R	1.37817	2.42736	VC2780	VC2780_S3	24H	MK_1
Red	54	Average	0.0607551	15506.6	143035	Image_15.tif	GRB_R	0.885544	0.935229	VC2780	VC2780_S7	24H	MK_1
Red	56	Average	0.0882616	23162.8	296281	Image_17.tif	GRB_R	1.32277	1.93722	VC2780	VC2780_S7	24H	MK_1
Red	1	Average	0.103597	23851.8	349650	Image_22.tif	GRB_R	1.36212	2.28616	VC2780	VC2780_S7	24H	MK_1
Red	8	Average	0.0766861	22492.2	250472	Image_28.tif	GRB_R	1.28447	1.6377	VC2780	VC2780_S8	24H	MK_1
Red	14	Average	0.0646941	15543.2	148309	Image_30.tif	GRB_R	0.887632	0.969708	VC2780	VC2780_S8	24H	MK_1
Red	18	Average	0.0616961	19637.6	175386	Image_33.tif	GRB_R	1.12146	1.14675	VC2780	VC2780_S8	24H	MK_1
Red	20	Average	0.0700711	20397.2	201318	Image_35.tif	GRB_R	1.16483	1.31631	VC2780	VC2780_S8	24H	MK_1
Red	21	Average	0.0597058	20295	188318	Image_47.tif	GRB_R	1.159	1.23131	VC2780	VC2780_S4	24H	MK_1
Red	23	Average	0.0635106	21277	219961	Image_49.tif	GRB_R	1.21508	1.4382	VC2780	VC2780_S4	24H	MK_1
Red	31	Average	0.0586926	16239.6	154622	Image_7_2.tif	GRB_R	0.927404	1.01099	VC2780	VC2780_S3	24H	MK_1
Red	33	Average	0.0923425	25007.4	347181	Image_9_2.tif	GRB_R	1.42811	2.27003	VC2780	VC2780_S3	24H	MK_1
Blue	17	Average	0.100123	21003	305784	Image_13_MK.tif	GRB_B	1.44702	2.52342	VC2780	VC2780_S3	24H	MK_1
Blue	54	Average	0.0607551	18730.5	168552	Image_15.tif	GRB_B	1.29045	1.39094	VC2780	VC2780_S7	24H	MK_1
Blue	56	Average	0.0882616	14521.9	193690	Image_17.tif	GRB_B	1.00049	1.59838	VC2780	VC2780_S7	24H	MK_1
Blue	1	Average	0.103597	15665.1	248115	Image_22.tif	GRB_B	1.07926	2.04752	VC2780	VC2780_S7	24H	MK_1
Blue	8	Average	0.0766861	18647	241282	Image_28.tif	GRB_B	1.2847	1.99113	VC2780	VC2780_S8	24H	MK_1
Blue	14	Average	0.0646941	14205.8	143712	Image_30.tif	GRB_B	0.978722	1.18596	VC2780	VC2780_S8	24H	MK_1
Blue	18	Average	0.0616961	16438	159100	Image_33.tif	GRB_B	1.13251	1.31294	VC2780	VC2780_S8	24H	MK_1
Blue	20	Average	0.0700711	17436.6	173140	Image_35.tif	GRB_B	1.20131	1.4288	VC2780	VC2780_S8	24H	MK_1
Blue	21	Average	0.0597058	19768.9	185886	Image_47.tif	GRB_B	1.362	1.53399	VC2780	VC2780_S4	24H	MK_1
Blue	23	Average	0.0635106	13108.1	140849	Image_49.tif	GRB_B	0.903091	1.16232	VC2780	VC2780_S4	24H	MK_1
Blue	31	Average	0.0586926	16468.7	148977	Image_7_2.tif	GRB_B	1.13462	1.2294	VC2780	VC2780_S3	24H	MK_1
Blue	33	Average	0.0923425	18613.7	298161	Image_9_2.tif	GRB_B	1.28241	2.46051	VC2780	VC2780_S3	24H	MK_1
Red	15	Average	0.0778624	20608.3	273108	Copy of Image 17_Maximum intensity projection.tif	GRB_R	1.30322	2.03985	VC2786	VC2786_S1	24H	CTL
Red	19	Average	0.051615	15635.1	118544	Copy of Image 19_Maximum intensity projection.tif	GRB_R	0.988727	0.885403	VC2786	VC2786_S2	24H	CTL
Red	22	Average	0.0598815	14272.2	119654	Copy of Image 14_Maximum intensity projection.tif	GRB_R	0.902541	0.893695	VC2786	VC2786_S1	24H	CTL
Red	24	Average	0.0460748	15336.1	106872	Copy of Image 15_Maximum intensity projection.tif	GRB_R	0.96982	0.798231	VC2786	VC2786_S1	24H	CTL
Red	26	Average	0.0671398	18317.1	184297	Copy of Image 17_again_Maximum intensity projection.ome.tif	GRB_R	1.15833	1.37652	VC2786	VC2786_S2	24H	CTL
Red	33	Average	0.0362918	16101.4	81202.6	Copy of Image 36_Maximum intensity projection.tif	GRB_R	1.01822	0.606503	VC2786	VC2786_S4	24H	CTL
Red	38	Average	0.0494888	13652.2	94798.4	Copy of Image 41_Maximum intensity projection.tif	GRB_R	0.863336	0.70805	VC2786	VC2786_S4	24H	CTL
Red	44	Average	0.0502036	13786.1	96658.2	Copy of Image 1_Maximum intensity projection.tif	GRB_R	0.871798	0.721941	VC2786	VC2786_S3	24H	CTL
Red	45	Average	0.0582937	14611.6	129844	Copy of Image 3 oppositeside_Maximum intensity projection.tif	GRB_R	0.924006	0.969805	VC2786	VC2786_S3	24H	CTL
Blue	15	Average	0.0778624	17912.7	218500	Copy of Image 17_Maximum intensity projection.tif	GRB_B	1.26546	1.79023	VC2786	VC2786_S1	24H	CTL
Blue	19	Average	0.051615	13326.1	103568	Copy of Image 19_Maximum intensity projection.tif	GRB_B	0.941435	0.848564	VC2786	VC2786_S2	24H	CTL
Blue	22	Average	0.0598815	17328.1	153495	Copy of Image 14_Maximum intensity projection.tif	GRB_B	1.22416	1.25763	VC2786	VC2786_S1	24H	CTL
Blue	24	Average	0.0460748	11291.3	75981.4	Copy of Image 15_Maximum intensity projection.tif	GRB_B	0.79768	0.622538	VC2786	VC2786_S1	24H	CTL
Blue	26	Average	0.0671398	14305.7	143040	Copy of Image 17_again_Maximum intensity projection.ome.tif	GRB_B	1.01064	1.17197	VC2786	VC2786_S2	24H	CTL
Blue	33	Average	0.0362918	10796.7	55469.4	Copy of Image 36_Maximum intensity projection.tif	GRB_B	0.762744	0.454477	VC2786	VC2786_S4	24H	CTL
Blue	38	Average	0.0494888	12368.6	94698.8	Copy of Image 41_Maximum intensity projection.tif	GRB_B	0.873788	0.775896	VC2786	VC2786_S4	24H	CTL
Blue	44	Average	0.0502036	12237.7	93690.3	Copy of Image 1_Maximum intensity projection.tif	GRB_B	0.864541	0.767633	VC2786	VC2786_S3	24H	CTL
Blue	45	Average	0.0582937	17829.2	160016	Copy of Image 3 oppositeside_Maximum intensity projection.tif	GRB_B	1.25956	1.31106	VC2786	VC2786_S3	24H	CTL
Red	51	Average	0.0492689	16121.7	112891	Copy of Image 10_Maximum intensity projection.tif	GRB_R	1.0195	0.843184	VC2786	VC2786_S5	24H	MK_1
Red	53	Average	0.0955684	17868.8	255728	Copy of Image 12_and13Maximum intensity projection.tif	GRB_R	1.12998	1.91004	VC2786	VC2786_S5	24H	MK_1
Red	1	Average	0.0531499	16092.9	125211	Copy of Image 15_MKMaximum intensity projection.tif	GRB_R	1.01768	0.935202	VC2786	VC2786_S5	24H	MK_1
Red	4	Average	0.0697609	18513.6	178069	Copy of Image 9_Maximum intensity projection.tif	GRB_R	1.17076	1.33	VC2786	VC2786_S5	24H	MK_1
Red	6	Average	0.0670956	19611.1	189705	Copy of Image 18_Maximum intensity projection.tif	GRB_R	1.24016	1.41691	VC2786	VC2786_S8	24H	MK_1
Red	12	Average	0.0472637	14860.9	101165	Copy of Image 22_Maximum intensity projection.tif	GRB_R	0.939769	0.755605	VC2786	VC2786_S8	24H	MK_1
Red	15	Average	0.0686245	14489.4	142648	Copy of Image 23flatcell_Maximum intensity projection.tif	GRB_R	0.916276	1.06544	VC2786	VC2786_S8	24H	MK_1
Red	17	Average	0.0675586	16803	199928	Copy of Image 29_Maximum intensity projection.tif	GRB_R	1.06259	1.49327	VC2786	VC2786_S6	24H	MK_1
Red	21	Average	0.0446668	15198.9	94471.5	Copy of Image 31_Maximum intensity projection.tif	GRB_R	0.961146	0.705609	VC2786	VC2786_S6	24H	MK_1
Red	23	Average	0.0639204	15986.4	148224	Copy of Image 33_Maximum intensity projection.tif	GRB_R	1.01094	1.10708	VC2786	VC2786_S6	24H	MK_1
Red	26	Average	0.0700589	19756.2	203294	Copy of Image 34_Maximum intensity projection.tif	GRB_R	1.24933	1.51841	VC2786	VC2786_S6	24H	MK_1
Red	27	Average	0.0435502	15991.8	99657.2	Copy of Image 35_Maximum intensity projection.tif	GRB_R	1.01129	0.744341	VC2786	VC2786_S6	24H	MK_1
Red	31	Average	0.0485403	14317.5	100674	Copy of Image 43_Maximum intensity projection.tif	GRB_R	0.905406	0.751939	VC2786	VC2786_S7	24H	MK_1
Red	32	Average	0.0720252	17096.8	213840	Copy of Image 45_Maximum intensity projection.tif	GRB_R	1.08116	1.59717	VC2786	VC2786_S7	24H	MK_1
Blue	51	Average	0.0492689	12713.3	95629.3	Copy of Image 10_Maximum intensity projection.tif	GRB_B	0.898142	0.783519	VC2786	VC2786_S5	24H	MK_1
Blue	53	Average	0.0955684	19161.8	256021	Copy of Image 12_and13Maximum intensity projection.tif	GRB_B	1.3537	2.09766	VC2786	VC2786_S5	24H	MK_1
Blue	1	Average	0.0531499	10890.2	87414.1	Copy of Image 15_MKMaximum intensity projection.tif	GRB_B	0.769345	0.71621	VC2786	VC2786_S5	24H	MK_1
Blue	4	Average	0.0697609	14242.2	153254	Copy of Image 9_Maximum intensity projection.tif	GRB_B	1.00615	1.25565	VC2786	VC2786_S5	24H	MK_1
Blue	6	Average	0.0670956	14549.2	144332	Copy of Image 18_Maximum intensity projection.tif	GRB_B	1.02784	1.18255	VC2786	VC2786_S8	24H	MK_1
Blue	12	Average	0.0472637	18282.2	138500	Copy of Image 22_Maximum intensity projection.tif	GRB_B	1.29156	1.13477	VC2786	VC2786_S8	24H	MK_1
Blue	15	Average	0.0686245	11937.1	124415	Copy of Image 23flatcell_Maximum intensity projection.tif	GRB_B	0.843308	1.01937	VC2786	VC2786_S8	24H	MK_1
Blue	17	Average	0.0675586	11354.3	122189	Copy of Image 29_Maximum intensity projection.tif	GRB_B	0.802131	1.00113	VC2786	VC2786_S6	24H	MK_1
Blue	21	Average	0.0446668	12113.6	76651.8	Copy of Image 31_Maximum intensity projection.tif	GRB_B	0.855778	0.628031	VC2786	VC2786_S6	24H	MK_1
Blue	23	Average	0.0639204	17612.1	166235	Copy of Image 33_Maximum intensity projection.tif	GRB_B	1.24422	1.36201	VC2786	VC2786_S6	24H	MK_1
Blue	26	Average	0.0700589	14698.9	161572	Copy of Image 34_Maximum intensity projection.tif	GRB_B	1.03841	1.32381	VC2786	VC2786_S6	24H	MK_1
Blue	27	Average	0.0435502	12762.4	72625.3	Copy of Image 35_Maximum intensity projection.tif	GRB_B	0.901607	0.595041	VC2786	VC2786_S6	24H	MK_1
Blue	31	Average	0.0485403	20111.6	160322	Copy of Image 43_Maximum intensity projection.tif	GRB_B	1.4208	1.31357	VC2786	VC2786_S7	24H	MK_1
Blue	32	Average	0.0720252	15864.4	178508	Copy of Image 45_Maximum intensity projection.tif	GRB_B	1.12076	1.46257	VC2786	VC2786_S7	24H	MK_1
Red	41	Average	0.0889149	15468.6	199994	Copy of Image 12_Maximum intensity projection.tif	GRB_R	0.926744	0.789348	VC2786	VC2786_6H_S1	6H	CTL
Red	47	Average	0.102222	13395.2	202955	Copy of Image 13_Maximum intensity projection.tif	GRB_R	0.802525	0.801031	VC2786	VC2786_6H_S1	6H	CTL
Red	54	Average	0.0953264	19322.6	285499	Copy of Image 28_Maximum intensity projection.tif	GRB_R	1.15764	1.12682	VC2786	VC2786_6H_S2	6H	CTL
Red	59	Average	0.134798	19292.3	365053	Copy of Image 30_Maximum intensity projection.tif	GRB_R	1.15583	1.44081	VC2786	VC2786_6H_S2	6H	CTL
Red	2	Average	0.0821514	15498.1	195644	Copy of Image 31_Maximum intensity projection.tif	GRB_R	0.928514	0.772179	VC2786	VC2786_6H_S2	6H	CTL
Red	6	Average	0.0821102	17962.9	201206	Copy of Image 32_Maximum intensity projection.tif	GRB_R	1.07618	0.794131	VC2786	VC2786_6H_S2	6H	CTL
Red	8	Average	0.0909714	16249.3	220573	Copy of Image 7_Maximum intensity projection.tif	GRB_R	0.973518	0.870567	VC2786	VC2786_6H_S1	6H	CTL
Red	45	Average	0.120867	16661.8	313244	Copy of Image 9_Maximum intensity projection.tif	GRB_R	0.99823	1.23633	VC2786	VC2786_6H_S1	6H	CTL
Red	48	Average	0.132465	16371.1	296131	Copy of Image29_Maximum intensity projection.tif	GRB_R	0.980815	1.16879	VC2786	VC2786_6H_S2	6H	CTL
Red	41	Average	0.0889149	12112.5	152362	Copy of Image 12_Maximum intensity projection.tif	GRB_B	0.914851	0.749529	VC2786	VC2786_6H_S1	6H	CTL
Blue	47	Average	0.102222	11066.5	166567	Copy of Image 13_Maximum intensity projection.tif	GRB_B	0.83585	0.819405	VC2786	VC2786_6H_S1	6H	CTL
Blue	54	Average	0.0953264	12086.1	152969	Copy of Image 28_Maximum intensity projection.tif	GRB_B	0.912858	0.752514	VC2786	VC2786_6H_S2	6H	CTL
Blue	59	Average	0.134798	12054.3	246057	Copy of Image 30_Maximum intensity projection.tif	GRB_B	0.910452	1.21045	VC2786	VC2786_6H_S2	6H	CTL
Blue	2	Average	0.0821514	16841.1	220635	Copy of Image 31_Maximum intensity projection.tif	GRB_B	1.272	1.08539	VC2786	VC2786_6H_S2	6H	CTL
Blue	6	Average	0.0821102	15839	199417	Copy of Image 32_Maximum intensity projection.tif	GRB_B	1.19631	0.981006	VC2786	VC2786_6H_S2	6H	CTL
Blue	8	Average	0.0909714	12586.9	200160	Copy of Image 7_Maximum intensity projection.tif	GRB_B	0.950685	0.984661	VC2786	VC2786_6H_S1	6H	CTL
Blue	45	Average	0.120867	13417.6	245855	Copy of Image 9_Maximum intensity projection.tif	GRB_B	1.01342	1.20946	VC2786	VC2786_6H_S1	6H	CTL
Blue	48	Average	0.132465	13154.7	245477	Copy of Image29_Maximum intensity projection.tif	GRB_B	0.993568	1.20759	VC2786	VC2786_6H_S2	6H	CTL
Red	14	Average	0.0971684	17517.2	235689	Copy of Image 15_Maximum intensity projection.tif	GRB_R	1.04948	0.930227	VC2786	VC2786_6H_S3	6H	MK_1
Red	54	Average	0.0666061	13652.6	122735	Copy of Image 17_Maximum intensity projection.tif	GRB_R	0.817946	0.484417	VC2786	VC2786_6H_S3	6H	MK_1
Red	56	Average	0.0993589	18824.4	264470	Copy of Image 19_Maximum intensity projection.tif	GRB_R	1.1278	1.04382	VC2786	VC2786_6H_S3	6H	MK_1
Red	59	Average	0.126586	18651.8	347628	Copy of Image 21_Maximum intensity projection.tif	GRB_R	1.11746	1.37203	VC2786	VC2786_6H_S3	6H	MK_1
Red	1	Average	0.0753055	20108.9	220124	Copy of Image 24_Maximum intensity projection.tif	GRB_R	1.20475	0.868795	VC2786	VC2786_6H_S3	6H	MK_1
Red	3	Average	0.0861105	14479.1	180080	Copy of Image 34_Maximum intensity projection.tif	GRB_R	0.86746	0.710748	VC2786	VC2786_6H_S4	6H	MK_1
Red	4	Average	0.127828	19727.4	363776	Copy of Image 3_Maximum intensity projection.tif	GRB_R	1.1819	1.43577	VC2786	VC2786_6H_S5	6H	MK_1
Red	6	Average	0.10071	17071.2	265466	Copy of Image 4_DISTALMaximum intensity projection.tif	GRB_R	1.02276	1.04775	VC2786	VC2786_6H_S5	6H	MK_1
Red	7	Average	0.0939317	18110.7	243160	Copy of Image 6_Maximum intensity projection.tif	GRB_R	1.08504	0.959717	VC2786	VC2786_6H_S5	6H	MK_1
Red	9	Average	0.107061	20345.7	350732	Copy of Image33_Maximum intensity projection.tif	GRB_R	1.21894	1.38429	VC2786	VC2786_6H_S4	6H	MK_1
Blue	14	Average	0.0971684	13622.5	182666	Copy of Image 15_Maximum intensity projection.tif	GRB_B	1.0289	0.898603	VC2786	VC2786_6H_S3	6H	MK_1
Blue	54	Average	0.0666061	12746.9	119045	Copy of Image 17_Maximum intensity projection.tif	GRB_B	0.962769	0.585626	VC2786	VC2786_6H_S3	6H	MK_1
Blue	56	Average	0.0993589	13677.2	205615	Copy of Image 19_Maximum intensity projection.tif	GRB_B	1.03303	1.0115	VC2786	VC2786_6H_S3	6H	MK_1
Blue	59	Average	0.126586	15750.2	311013	Copy of Image 21_Maximum intensity projection.tif	GRB_B	1.18961	1.52999	VC2786	VC2786_6H_S3	6H	MK_1
Blue	1	Average	0.0753055	13738	143234	Copy of Image 24_Maximum intensity projection.tif	GRB_B	1.03762	0.704621	VC2786	VC2786_6H_S3	6H	MK_1
Blue	3	Average	0.0861105	14052.5	190093	Copy of Image 34_Maximum intensity projection.tif	GRB_B	1.06138	0.935139	VC2786	VC2786_6H_S4	6H	MK_1
Blue	4	Average	0.127828	20278.1	377255	Copy of Image 3_Maximum intensity projection.tif	GRB_B	1.5316	1.85586	VC2786	VC2786_6H_S5	6H	MK_1
Blue	6	Average	0.10071	14641.4	228217	Copy of Image 4_DISTALMaximum intensity projection.tif	GRB_B	1.10586	1.12269	VC2786	VC2786_6H_S5	6H	MK_1
Blue	7	Average	0.0939317	14878.5	200149	Copy of Image 6_Maximum intensity projection.tif	GRB_B	1.12377	0.98461	VC2786	VC2786_6H_S5	6H	MK_1
Blue	9	Average	0.107061	14323.4	262554	Copy of Image33_Maximum intensity projection.tif	GRB_B	1.08184	1.2916	VC2786	VC2786_6H_S4	6H	MK_1
Red	55	Average	0.090211	19798.5	249251	Copy of Image 15_Maximum intensity projection.tif	GRB_R	1.22058	1.32331	VC2788	VC2788_S1	24H	CTL
Red	57	Average	0.0801012	13425.2	144667	Copy of Image 20_Maximum intensity projection.tif	GRB_R	0.827667	0.76806	VC2788	VC2788_S2	24H	CTL
Red	59	Average	0.0780999	15437.9	171144	Copy of Image 21_Maximum intensity projection.tif	GRB_R	0.951751	0.908627	VC2788	VC2788_S2	24H	CTL
Blue	55	Average	0.090211	11323.9	150902	Copy of Image 15_Maximum intensity projection.tif	GRB_B	0.938284	1.00223	VC2788	VC2788_S1	24H	CTL
Blue	57	Average	0.0801012	14503	184056	Copy of Image 20_Maximum intensity projection.tif	GRB_B	1.2017	1.22243	VC2788	VC2788_S2	24H	CTL
Blue	59	Average	0.0780999	10379.4	116739	Copy of Image 21_Maximum intensity projection.tif	GRB_B	0.860018	0.775333	VC2788	VC2788_S2	24H	CTL
Red	0	Average	0.079842	17451.2	206210	Copy of Image 13_Maximum intensity projection.tif	GRB_R	1.07587	1.0948	VC2788	VC2788_S3	24H	L_1
Red	4	Average	0.0877602	13718.2	177396	Copy of Image 16_Maximum intensity projection.tif	GRB_R	0.845729	0.94182	VC2788	VC2788_S4	24H	L_1
Red	6	Average	0.0806484	15632.4	179320	Copy of Image 17_Maximum intensity projection.tif	GRB_R	0.963741	0.952034	VC2788	VC2788_S4	24H	L_1
Red	7	Average	0.0638736	16426.9	144400	Copy of Image 22_Maximum intensity projection.tif	GRB_R	1.01272	0.766639	VC2788	VC2788_S5	24H	L_1
Blue	0	Average	0.079842	12845.5	152000	Copy of Image 13_Maximum intensity projection.tif	GRB_B	1.06436	1.00953	VC2788	VC2788_S3	24H	L_1
Blue	4	Average	0.0877602	11446.7	150882	Copy of Image 16_Maximum intensity projection.tif	GRB_B	0.948454	1.0021	VC2788	VC2788_S4	24H	L_1
Blue	6	Average	0.0806484	10425.2	133767	Copy of Image 17_Maximum intensity projection.tif	GRB_B	0.863812	0.88843	VC2788	VC2788_S4	24H	L_1
Blue	7	Average	0.0638736	9478.68	83754.4	Copy of Image 22_Maximum intensity projection.tif	GRB_B	0.785388	0.556265	VC2788	VC2788_S5	24H	L_1
Red	8	Average	0.0897397	20849.1	261061	Copy of Image 18_Maximum intensity projection.tif	GRB_R	1.28535	1.38601	VC2788	VC2788_S6	24H	MK_1
Red	9	Average	0.0695949	18404.9	194259	Copy of Image 19_Maximum intensity projection.tif	GRB_R	1.13467	1.03135	VC2788	VC2788_S7	24H	MK_1
Blue	8	Average	0.0897397	12710.6	159634	Copy of Image 18_Maximum intensity projection.tif	GRB_B	1.05318	1.06023	VC2788	VC2788_S6	24H	MK_1
Blue	9	Average	0.0695949	10617.6	104446	Copy of Image 19_Maximum intensity projection.tif	GRB_B	0.879753	0.693694	VC2788	VC2788_S7	24H	MK_1
Red	11	Average	0.0988418	19968.2	282431	Copy of Image 11_Maximum intensity projection.tif	GRB_R	1.1773	1.32888	VC2792	VC2792_S1	24H	CTL
Red	13	Average	0.0839896	18001.9	203959	Copy of Image 6_Maximum intensity projection.tif	GRB_R	1.06137	0.959658	VC2792	VC2792_S1	24H	CTL
Red	15	Average	0.0580669	13794.6	113537	Copy of Image 8_Maximum intensity projection.tif	GRB_R	0.813315	0.534207	VC2792	VC2792_S1	24H	CTL
Red	16	Average	0.0934119	18735	256660	Copy of Image 9_Maximum intensity projection.tif	GRB_R	1.10459	1.20762	VC2792	VC2792_S1	24H	CTL
Red	19	Average	0.0858906	14557.2	181972	Copy of Image 33_Maximum intensity projection.tif	GRB_R	0.858277	0.856206	VC2792	VC2792_S2	24H	CTL
Red	21	Average	0.093778	15884.9	216494	Copy of Image 34_Maximum intensity projection.tif	GRB_R	0.936551	1.01863	VC2792	VC2792_S2	24H	CTL
Red	29	Average	0.092907	17785.2	232678	Copy of Image 40_Maximum intensity projection.tif	GRB_R	1.0486	1.09479	VC2792	VC2792_S2	24H	CTL
Blue	11	Average	0.0988418	14171.4	225782	Copy of Image 11_Maximum intensity projection.tif	GRB_B	0.987691	1.21841	VC2792	VC2792_S1	24H	CTL
Blue	13	Average	0.0839896	11971.7	135849	Copy of Image 6_Maximum intensity projection.tif	GRB_B	0.834376	0.733096	VC2792	VC2792_S1	24H	CTL
Blue	15	Average	0.0580669	15157.6	114130	Copy of Image 8_Maximum intensity projection.tif	GRB_B	1.05642	0.615893	VC2792	VC2792_S1	24H	CTL
Blue	16	Average	0.0934119	16012.4	228910	Copy of Image 9_Maximum intensity projection.tif	GRB_B	1.116	1.23529	VC2792	VC2792_S1	24H	CTL
Blue	19	Average	0.0858906	14577.5	180446	Copy of Image 33_Maximum intensity projection.tif	GRB_B	1.01599	0.973759	VC2792	VC2792_S2	24H	CTL
Blue	21	Average	0.093778	14181.6	188788	Copy of Image 34_Maximum intensity projection.tif	GRB_B	0.988399	1.01878	VC2792	VC2792_S2	24H	CTL
Blue	29	Average	0.092907	14364	223254	Copy of Image 40_Maximum intensity projection.tif	GRB_B	1.00111	1.20477	VC2792	VC2792_S2	24H	CTL
Red	7	Average	0.0860634	18131.1	225059	Copy of Image 12_Maximum intensity projection.tif	GRB_R	1.06899	1.05894	VC2792	VC2792_S3	24H	L_1
Red	9	Average	0.0798419	15382.1	176592	Copy of Image 14_Maximum intensity projection.tif	GRB_R	0.906908	0.83089	VC2792	VC2792_S3	24H	L_1
Red	10	Average	0.0819158	18085.6	210991	Copy of Image 15_Maximum intensity projection.tif	GRB_R	1.0663	0.992746	VC2792	VC2792_S3	24H	L_1
Red	12	Average	0.0644179	13633.2	122257	Copy of Image 35_Maximum intensity projection.tif	GRB_R	0.803797	0.575239	VC2792	VC2792_S4	24H	L_1
Red	15	Average	0.0635106	14436.6	132407	Copy of Image 37_Maximum intensity projection.tif	GRB_R	0.851165	0.622994	VC2792	VC2792_S4	24H	L_1
Red	16	Average	0.0739949	15179.2	159310	Copy of Image 38_Maximum intensity projection.tif	GRB_R	0.894946	0.749578	VC2792	VC2792_S4	24H	L_1
Red	19	Average	0.0737177	16385.4	170238	Copy of Image 18_Maximum intensity projection.tif	GRB_R	0.966066	0.800994	VC2792	VC2792_S5	24H	L_1
Red	21	Average	0.079842	19194.3	237102	Copy of Image 20_Maximum intensity projection.tif	GRB_R	1.13167	1.1156	VC2792	VC2792_S5	24H	L_1
Blue	7	Average	0.0860634	12677.5	155792	Copy of Image 12_Maximum intensity projection.tif	GRB_B	0.883568	0.840716	VC2792	VC2792_S3	24H	L_1
Blue	9	Average	0.0798419	12153	143510	Copy of Image 14_Maximum intensity projection.tif	GRB_B	0.847017	0.774438	VC2792	VC2792_S3	24H	L_1
Blue	10	Average	0.0819158	14305.7	185909	Copy of Image 15_Maximum intensity projection.tif	GRB_B	0.997049	1.00324	VC2792	VC2792_S3	24H	L_1
Blue	12	Average	0.0644179	11518.3	108553	Copy of Image 35_Maximum intensity projection.tif	GRB_B	0.802781	0.585798	VC2792	VC2792_S4	24H	L_1
Blue	15	Average	0.0635106	11162.8	105285	Copy of Image 37_Maximum intensity projection.tif	GRB_B	0.778	0.568159	VC2792	VC2792_S4	24H	L_1
Blue	16	Average	0.0739949	13304.5	149354	Copy of Image 38_Maximum intensity projection.tif	GRB_B	0.927272	0.805974	VC2792	VC2792_S4	24H	L_1
Blue	19	Average	0.0737177	12911.7	141445	Copy of Image 18_Maximum intensity projection.tif	GRB_B	0.899891	0.763295	VC2792	VC2792_S5	24H	L_1
Blue	21	Average	0.079842	11584.7	145691	Copy of Image 20_Maximum intensity projection.tif	GRB_B	0.807404	0.786208	VC2792	VC2792_S5	24H	L_1
Red	34	Average	0.0658836	13070.9	124129	Copy of Image 39_Maximum intensity projection.tif	GRB_R	0.770644	0.584044	VC2792	VC2792_S6	24H	L_2
Red	36	Average	0.0638736	12376.4	118842	Copy of Image 22_Maximum intensity projection.tif	GRB_R	0.729699	0.559169	VC2792	VC2792_S7	24H	L_2
Blue	34	Average	0.0658836	14447.6	134492	Copy of Image 39_Maximum intensity projection.tif	GRB_B	1.00694	0.725775	VC2792	VC2792_S6	24H	L_2
Blue	36	Average	0.0638736	11450.1	89857.8	Copy of Image 22_Maximum intensity projection.tif	GRB_B	0.798024	0.484909	VC2792	VC2792_S7	24H	L_2
Red	42	Average	0.0846808	16850.9	203873	Copy of Image 1_Maximum intensity projection.tif	GRB_R	0.993506	0.959253	VC2792	VC2792_S8	24H	MK_1
Red	44	Average	0.117041	18507.9	309874	Copy of Image 3_Maximum intensity projection.tif	GRB_R	1.09121	1.45801	VC2792	VC2792_S8	24H	MK_1
Red	45	Average	0.0759993	13780	149009	Copy of Image 5_Maximum intensity projection.tif	GRB_R	0.812451	0.701109	VC2792	VC2792_S8	24H	MK_1
Red	46	Average	0.103826	17111.4	263019	Copy of Image 27_Maximum intensity projection.tif	GRB_R	1.00887	1.23754	VC2792	VC2792_S9	24H	MK_1
Red	48	Average	0.0912479	15127.6	196751	Copy of Image 28_Maximum intensity projection.tif	GRB_R	0.891905	0.925743	VC2792	VC2792_S9	24H	MK_1
Red	49	Average	0.125596	25752.8	440713	Copy of Image 29_Maximum intensity projection.tif	GRB_R	1.51835	2.07362	VC2792	VC2792_S9	24H	MK_1
Blue	42	Average	0.0846808	11927.4	146771	Copy of Image 1_Maximum intensity projection.tif	GRB_B	0.831288	0.792034	VC2792	VC2792_S8	24H	MK_1
Blue	44	Average	0.117041	12652.9	212307	Copy of Image 3_Maximum intensity projection.tif	GRB_B	0.881855	1.1457	VC2792	VC2792_S8	24H	MK_1
Blue	45	Average	0.0759993	13722.7	144254	Copy of Image 5_Maximum intensity projection.tif	GRB_B	0.956419	0.778453	VC2792	VC2792_S8	24H	MK_1
Blue	46	Average	0.103826	14605.5	226245	Copy of Image 27_Maximum intensity projection.tif	GRB_B	1.01794	1.22091	VC2792	VC2792_S9	24H	MK_1
Blue	48	Average	0.0912479	11095	158035	Copy of Image 28_Maximum intensity projection.tif	GRB_B	0.773278	0.852821	VC2792	VC2792_S9	24H	MK_1
Blue	49	Average	0.125596	17170.9	335415	Copy of Image 29_Maximum intensity projection.tif	GRB_B	1.19674	1.81003	VC2792	VC2792_S9	24H	MK_1
Red	58	Average	0.070769	15105.8	152913	Copy of Image 35_Maximum intensity projection.tif	GRB_R	0.878032	0.590784	VC2794	VC2794_S1	24H	CTL
Red	0	Average	0.115818	19592.9	336328	Copy of Image 37_Maximum intensity projection.tif	GRB_R	1.13884	1.29941	VC2794	VC2794_S1	24H	CTL
Red	1	Average	0.136941	17875.1	347402	Copy of Image 40_Maximum intensity projection.tif	GRB_R	1.039	1.3422	VC2794	VC2794_S1	24H	CTL
Red	2	Average	0.0881891	14736.8	196768	Copy of Image 51_Maximum intensity projection.tif	GRB_R	0.856582	0.760217	VC2794	VC2794_S2	24H	CTL
Red	3	Average	0.0759708	14977.9	160997	Copy of Image 53_Maximum intensity projection.tif	GRB_R	0.870595	0.622015	VC2794	VC2794_S2	24H	CTL
Red	44	Average	0.103069	14118.4	236638	CTL 10.tif	GRB_R	0.820636	0.914257	VC2794	VC2794_S7	24H	CTL
Red	48	Average	0.101426	24022.4	380770	CTL8.tif	GRB_R	1.39631	1.47112	VC2794	VC2794_S7	24H	CTL
Blue	58	Average	0.070769	9288.74	108405	Copy of Image 35_Maximum intensity projection.tif	GRB_B	0.908092	0.670253	VC2794	VC2794_S1	24H	CTL
Blue	0	Average	0.115818	8821.88	147441	Copy of Image 37_Maximum intensity projection.tif	GRB_B	0.862451	0.911607	VC2794	VC2794_S1	24H	CTL
Blue	1	Average	0.136941	11472	261953	Copy of Image 40_Maximum intensity projection.tif	GRB_B	1.12153	1.61962	VC2794	VC2794_S1	24H	CTL
Blue	2	Average	0.0881891	10695.6	143668	Copy of Image 51_Maximum intensity projection.tif	GRB_B	1.04563	0.888281	VC2794	VC2794_S2	24H	CTL
Blue	3	Average	0.0759708	9281.62	100988	Copy of Image 53_Maximum intensity projection.tif	GRB_B	0.907396	0.624393	VC2794	VC2794_S2	24H	CTL
Blue	44	Average	0.103069	7777.24	136692	CTL 10.tif	GRB_B	0.760324	0.845151	VC2794	VC2794_S7	24H	CTL
Blue	48	Average	0.101426	14264.9	233014	CTL8.tif	GRB_B	1.39457	1.44069	VC2794	VC2794_S7	24H	CTL
Red	59	Average	0.0871003	18925.1	250133	Copy of Image 42_Maximum intensity projection.tif	GRB_R	1.10003	0.966396	VC2794	VC2794_S5	24H	L_1
Red	2	Average	0.108011	17967.1	282252	Copy of Image 44_Maximum intensity projection.tif	GRB_R	1.04434	1.09049	VC2794	VC2794_S5	24H	L_1
Red	3	Average	0.0665876	18167.5	170442	Copy of Image 46_Maximum intensity projection.tif	GRB_R	1.05599	0.658509	VC2794	VC2794_S5	24H	L_1
Red	4	Average	0.0759336	17668.6	186653	Copy of Image 47_Maximum intensity projection.tif	GRB_R	1.027	0.72114	VC2794	VC2794_S6	24H	L_1
Red	5	Average	0.0907295	19399.1	251875	Copy of Image 49_Maximum intensity projection.tif	GRB_R	1.12758	0.973126	VC2794	VC2794_S6	24H	L_1
Red	51	Average	0.133761	22007.1	407256	05L_17.tif	GRB_R	1.27917	1.57345	VC2794	VC2794_S8	24H	L_05
Red	53	Average	0.13065	27999.9	533716	05L_18.tif	GRB_R	1.62751	2.06203	VC2794	VC2794_S8	24H	L_05
Red	55	Average	0.0666449	18111.9	171950	05L_1.tif	GRB_R	1.05277	0.664332	VC2794	VC2794_S9	24H	L_05
Red	1	Average	0.0856486	16722.5	213167	05L_5.tif	GRB_R	0.972005	0.823577	VC2794	VC2794_S9	24H	L_05
Red	13	Average	0.0810862	16734.3	201533	2L_14.tif	GRB_R	0.972689	0.778629	VC2794	VC2794_S11	24H	L_2
Red	15	Average	0.0607063	19410.2	172833	2L_15.tif	GRB_R	1.12823	0.667747	VC2794	VC2794_S11	24H	L_2
Blue	59	Average	0.0871003	9150.25	115313	Copy of Image 42_Maximum intensity projection.tif	GRB_B	0.894554	0.712963	VC2794	VC2794_S5	24H	L_1
Blue	2	Average	0.108011	13161.5	214183	Copy of Image 44_Maximum intensity projection.tif	GRB_B	1.2867	1.32427	VC2794	VC2794_S5	24H	L_1
Blue	3	Average	0.0665876	8677.32	75183	Copy of Image 46_Maximum intensity projection.tif	GRB_B	0.848318	0.464847	VC2794	VC2794_S5	24H	L_1
Blue	4	Average	0.0759336	9143.63	97273.5	Copy of Image 47_Maximum intensity projection.tif	GRB_B	0.893906	0.60143	VC2794	VC2794_S6	24H	L_1
Blue	5	Average	0.0907295	12879.6	174274	Copy of Image 49_Maximum intensity projection.tif	GRB_B	1.25915	1.07751	VC2794	VC2794_S6	24H	L_1
Blue	51	Average	0.133761	11166.8	211825	05L_17.tif	GRB_B	1.09169	1.30969	VC2794	VC2794_S8	24H	L_05
Blue	53	Average	0.13065	8294.91	159547	05L_18.tif	GRB_B	0.810933	0.986458	VC2794	VC2794_S8	24H	L_05
Blue	55	Average	0.0666449	8607.7	84433.9	05L_1.tif	GRB_B	0.841512	0.522044	VC2794	VC2794_S9	24H	L_05
Blue	1	Average	0.0856486	8913.92	109779	05L_5.tif	GRB_B	0.871449	0.678749	VC2794	VC2794_S9	24H	L_05
Blue	13	Average	0.0810862	8952.55	106886	2L_14.tif	GRB_B	0.875225	0.660865	VC2794	VC2794_S11	24H	L_2
Blue	15	Average	0.0607063	10423.1	91495.3	2L_15.tif	GRB_B	1.01899	0.565703	VC2794	VC2794_S11	24H	L_2
Red	4	Average	0.101617	21431.5	298049	Copy of Image 21_ HIGH VGLUT lowered afte Maximum intensity projection.tif	GRB_R	1.24572	1.15152	VC2794	VC2794_S3	24H	MK_2
Red	6	Average	0.0960665	16635.1	227797	Copy of Image 23_Maximum intensity projection.tif	GRB_R	0.966922	0.8801	VC2794	VC2794_S3	24H	MK_2
Red	7	Average	0.0740853	16559.6	173324	Copy of Image 26.tif	GRB_R	0.962536	0.669642	VC2794	VC2794_S3	24H	MK_2
Red	8	Average	0.11984	21225	367391	Copy of Image 28_Maximum intensity projection.tif	GRB_R	1.23371	1.41943	VC2794	VC2794_S4	24H	MK_2
Red	9	Average	0.0916055	15703.5	216180	Copy of Image 30_Maximum intensity projection.tif	GRB_R	0.912774	0.835219	VC2794	VC2794_S4	24H	MK_2
Red	11	Average	0.113023	28103.9	517981	05L_55.tif	GRB_R	1.63355	2.00123	VC2794	VC2794_S10	24H	MK_05
Red	19	Average	0.100528	18538.6	268483	05MK_25.tif	GRB_R	1.07756	1.03729	VC2794	VC2794_S12	24H	MK_05
Red	20	Average	0.117948	20941.2	381438	05MK_27.tif	GRB_R	1.21722	1.47369	VC2794	VC2794_S12	24H	MK_05
Red	25	Average	0.0846808	14405.6	177958	2MK_22.tif	GRB_R	0.837332	0.687547	VC2794	VC2794_S13	24H	MK_2
Red	26	Average	0.0834711	13495.2	159195	2MK_24.tif	GRB_R	0.784415	0.615056	VC2794	VC2794_S13	24H	MK_2
Blue	4	Average	0.101617	14894.1	200249	Copy of Image 21_ HIGH VGLUT lowered afte Maximum intensity projection.tif	GRB_B	1.45609	1.23811	VC2794	VC2794_S3	24H	MK_2
Blue	6	Average	0.0960665	11144	151762	Copy of Image 23_Maximum intensity projection.tif	GRB_B	1.08947	0.938324	VC2794	VC2794_S3	24H	MK_2
Blue	7	Average	0.0740853	8606.26	102907	Copy of Image 26.tif	GRB_B	0.841371	0.636259	VC2794	VC2794_S3	24H	MK_2
Blue	8	Average	0.11984	11002.3	205985	Copy of Image 28_Maximum intensity projection.tif	GRB_B	1.07561	1.27358	VC2794	VC2794_S4	24H	MK_2
Blue	9	Average	0.0916055	10626	158489	Copy of Image 30_Maximum intensity projection.tif	GRB_B	1.03882	0.97992	VC2794	VC2794_S4	24H	MK_2
Blue	11	Average	0.113023	7948.23	125821	05L_55.tif	GRB_B	0.77704	0.777935	VC2794	VC2794_S10	24H	MK_05
Blue	19	Average	0.100528	10459	163384	05MK_25.tif	GRB_B	1.0225	1.01018	VC2794	VC2794_S12	24H	MK_05
Blue	20	Average	0.117948	13035.8	257057	05MK_27.tif	GRB_B	1.27442	1.58935	VC2794	VC2794_S12	24H	MK_05
Blue	25	Average	0.0846808	8223.77	114556	2MK_22.tif	GRB_B	0.803978	0.708288	VC2794	VC2794_S13	24H	MK_2
Blue	26	Average	0.0834711	8839.94	107344	2MK_24.tif	GRB_B	0.864216	0.663696	VC2794	VC2794_S13	24H	MK_2
Red	15	Average	0.0488984	18230.9	129142	ctl_27.tif	GRB_R	1.18748	1.28779	VC2798	VC2798_6H_S1	6H	CTL
Red	17	Average	0.0382274	12871.1	68776.1	ctl_28.tif	GRB_R	0.838369	0.685828	VC2798	VC2798_6H_S1	6H	CTL
Red	18	Average	0.0475422	14955.6	102928	ctl_29.tif	GRB_R	0.974146	1.02639	VC2798	VC2798_6H_S1	6H	CTL
Blue	15	Average	0.0488984	12430.2	96935.3	ctl_27.tif	GRB_B	1.25558	1.3601	VC2798	VC2798_6H_S1	6H	CTL
Blue	17	Average	0.0382274	6042.62	35859.7	ctl_28.tif	GRB_B	0.610366	0.503146	VC2798	VC2798_6H_S1	6H	CTL
Blue	18	Average	0.0475422	11227.2	81017.8	ctl_29.tif	GRB_B	1.13406	1.13676	VC2798	VC2798_6H_S1	6H	CTL
Red	20	Average	0.0394025	17017.3	98371.6	L_30.tif	GRB_R	1.10844	0.980951	VC2798	VC2798_6H_S2	6H	L_2
Red	22	Average	0.0493568	14032.9	102978	L_31.tif	GRB_R	0.914048	1.02689	VC2798	VC2798_6H_S2	6H	L_2
Red	23	Average	0.0377435	11275.9	58710	L_32.tif	GRB_R	0.73447	0.58545	VC2798	VC2798_6H_S2	6H	L_2
Blue	20	Average	0.0394025	8793.32	52928.4	L_30.tif	GRB_B	0.888215	0.742636	VC2798	VC2798_6H_S2	6H	L_2
Blue	22	Average	0.0493568	13120	101515	L_31.tif	GRB_B	1.32525	1.42436	VC2798	VC2798_6H_S2	6H	L_2
Blue	23	Average	0.0377435	9715.61	51627.1	L_32.tif	GRB_B	0.981375	0.724379	VC2798	VC2798_6H_S2	6H	L_2
Red	52	Average	0.0451379	17565.6	112189	CTL19.tif	GRB_R	0.856568	0.744029	VC2798	VC2798_S1	24H	CTL
Red	53	Average	0.0511714	22260.9	168715	CTL20.tif	GRB_R	1.08553	1.1189	VC2798	VC2798_S1	24H	CTL
Red	57	Average	0.0502036	17809	129488	CTL22.tif	GRB_R	0.86844	0.858752	VC2798	VC2798_S1	24H	CTL
Red	58	Average	0.0475826	25007.1	163155	CTL23.tif	GRB_R	1.21945	1.08203	VC2798	VC2798_S2	24H	CTL
Red	0	Average	0.0493568	17927.1	143829	CTL24.tif	GRB_R	0.874198	0.953861	VC2798	VC2798_S2	24H	CTL
Red	1	Average	0.057407	22471.8	187342	CTL25.tif	GRB_R	1.09581	1.24243	VC2798	VC2798_S2	24H	CTL
Blue	52	Average	0.0451379	5239.2	33446.5	CTL19.tif	GRB_B	0.995444	0.881542	VC2798	VC2798_S1	24H	CTL
Blue	53	Average	0.0511714	5438.31	40017.4	CTL20.tif	GRB_B	1.03328	1.05473	VC2798	VC2798_S1	24H	CTL
Blue	57	Average	0.0502036	5248.13	39173.4	CTL22.tif	GRB_B	0.997141	1.03248	VC2798	VC2798_S1	24H	CTL
Blue	58	Average	0.0475826	5239.37	37647.7	CTL23.tif	GRB_B	0.995475	0.992272	VC2798	VC2798_S2	24H	CTL
Blue	0	Average	0.0493568	5051.5	34546.1	CTL24.tif	GRB_B	0.959782	0.910526	VC2798	VC2798_S2	24H	CTL
Blue	1	Average	0.057407	5362.57	42814.2	CTL25.tif	GRB_B	1.01888	1.12844	VC2798	VC2798_S2	24H	CTL
Red	7	Average	0.0457835	15997.5	103644	1L 11.tif	GRB_R	0.780104	0.687356	VC2798	VC2798_S5	24H	L_1
Red	8	Average	0.0646654	23307.4	215227	1L 30.tif	GRB_R	1.13656	1.42737	VC2798	VC2798_S6	24H	L_1
Red	10	Average	0.0419948	16594.6	100806	1L 31.tif	GRB_R	0.80922	0.668537	VC2798	VC2798_S6	24H	L_1
Red	11	Average	0.0499012	19926.2	139876	1L 9.tif	GRB_R	0.971683	0.927643	VC2798	VC2798_S5	24H	L_1
Red	13	Average	0.0402839	12264.8	68629.8	2L 13.tif	GRB_R	0.598079	0.455146	VC2798	VC2798_S7	24H	L_2
Red	0	Average	0.0711319	17276.1	176409	2L 15.tif	GRB_R	0.842454	1.16993	VC2798	VC2798_S7	24H	L_2
Red	15	Average	0.0471793	12678.1	76148.2	2L 26.tif	GRB_R	0.618233	0.505007	VC2798	VC2798_S8	24H	L_2
Red	17	Average	0.0450018	16544.1	106963	2L 27.tif	GRB_R	0.806758	0.709367	VC2798	VC2798_S8	24H	L_2
Red	19	Average	0.0554275	20923.7	166630	2L 29.tif	GRB_R	1.02032	1.10508	VC2798	VC2798_S8	24H	L_2
Blue	7	Average	0.0457835	4288.01	28753.5	1L 11.tif	GRB_B	0.814719	0.757851	VC2798	VC2798_S5	24H	L_1
Blue	8	Average	0.0646654	5116.43	46108.9	1L 30.tif	GRB_B	0.972117	1.21528	VC2798	VC2798_S6	24H	L_1
Blue	10	Average	0.0419948	4644.8	27805.8	1L 31.tif	GRB_B	0.882509	0.732871	VC2798	VC2798_S6	24H	L_1
Blue	11	Average	0.0499012	5114.45	40265.1	1L 9.tif	GRB_B	0.971741	1.06126	VC2798	VC2798_S5	24H	L_1
Blue	13	Average	0.0402839	4628.37	27191.2	2L 13.tif	GRB_B	0.879386	0.716674	VC2798	VC2798_S7	24H	L_2
Blue	0	Average	0.0711319	5551.29	63400.2	2L 15.tif	GRB_B	1.05474	1.67103	VC2798	VC2798_S7	24H	L_2
Blue	15	Average	0.0471793	4082.51	29692.2	2L 26.tif	GRB_B	0.775673	0.78259	VC2798	VC2798_S8	24H	L_2
Blue	17	Average	0.0450018	4140.85	24226.3	2L 27.tif	GRB_B	0.786757	0.638529	VC2798	VC2798_S8	24H	L_2
Blue	19	Average	0.0554275	4648.75	38696.7	2L 29.tif	GRB_B	0.883258	1.01992	VC2798	VC2798_S8	24H	L_2
Red	2	Average	0.0638736	24309.6	251617	MK 4.tif	GRB_R	1.18543	1.6687	VC2798	VC2798_S3	24H	MK_2
Red	4	Average	0.0624219	22889.2	207642	MK 6.tif	GRB_R	1.11617	1.37706	VC2798	VC2798_S3	24H	MK_2
Red	5	Average	0.0636502	22509.5	219484	MK 8.tif	GRB_R	1.09765	1.45559	VC2798	VC2798_S4	24H	MK_2
Blue	2	Average	0.0638736	6746.97	66828.7	MK 4.tif	GRB_B	1.28192	1.76139	VC2798	VC2798_S3	24H	MK_2
Blue	4	Average	0.0624219	6427.58	55454.7	MK 6.tif	GRB_B	1.22124	1.46161	VC2798	VC2798_S3	24H	MK_2
Blue	5	Average	0.0636502	4814.37	47693.2	MK 8.tif	GRB_B	0.914727	1.25704	VC2798	VC2798_S4	24H	MK_2
Red	2	Average	0.0473245	18313.1	127302	ctl 18.tif	GRB_R	1.04125	0.851925	VC2808	VC2808_S1	18H	CTL
Red	3	Average	0.0758095	21278.2	238150	ctl 1.tif	GRB_R	1.20984	1.59373	VC2808	VC2808_S2	18H	CTL
Red	3	Average	0.0506472	15432.3	115366	ctl 20.tif	GRB_R	0.87745	0.772044	VC2808	VC2808_S1	18H	CTL
Red	4	Average	0.0655163	20106.3	201359	ctl 32.tif	GRB_R	1.14321	1.34752	VC2808	VC2808_S3	18H	CTL
Red	4	Average	0.057704	18470	157524	ctl 34.tif	GRB_R	1.05017	1.05417	VC2808	VC2808_S3	18H	CTL
Red	5	Average	0.0565651	17199.2	138515	ctl 36.tif	GRB_R	0.977914	0.926964	VC2808	VC2808_S3	18H	CTL
Red	5	Average	0.0523864	16166.4	116474	ctl 38.tif	GRB_R	0.91919	0.779462	VC2808	VC2808_S4	18H	CTL
Red	5	Average	0.0653252	16307.1	159364	ctl 40.tif	GRB_R	0.927193	1.06649	VC2808	VC2808_S4	18H	CTL
Red	5	Average	0.0414763	14957.7	90617.1	ctl 41.tif	GRB_R	0.850465	0.606422	VC2808	VC2808_S4	18H	CTL
Red	6	Average	0.0642365	18438.7	171620	ctl 5.tif	GRB_R	1.04839	1.1485	VC2808	VC2808_S5	18H	CTL
Red	23	Average	0.0533841	16794.9	127429	ctl 7.tif	GRB_R	0.954924	0.852772	VC2808	VC2808_S5	18H	CTL
Blue	2	Average	0.0473245	10019.6	71236.9	ctl 18.tif	GRB_B	1.0128	0.821795	VC2808	VC2808_S1	18H	CTL
Blue	3	Average	0.0758095	9144.26	99331.2	ctl 1.tif	GRB_B	0.924314	1.14589	VC2808	VC2808_S2	18H	CTL
Blue	3	Average	0.0506472	11281.9	74778.9	ctl 20.tif	GRB_B	1.14039	0.862656	VC2808	VC2808_S1	18H	CTL
Blue	4	Average	0.0655163	10190.3	108880	ctl 32.tif	GRB_B	1.03005	1.25605	VC2808	VC2808_S3	18H	CTL
Blue	4	Average	0.057704	10193.4	88584.8	ctl 34.tif	GRB_B	1.03036	1.02192	VC2808	VC2808_S3	18H	CTL
Blue	5	Average	0.0565651	10400.8	86367.2	ctl 36.tif	GRB_B	1.05132	0.99634	VC2808	VC2808_S3	18H	CTL
Blue	5	Average	0.0523864	11877.8	94858.7	ctl 38.tif	GRB_B	1.20063	1.0943	VC2808	VC2808_S4	18H	CTL
Blue	5	Average	0.0653252	10258.5	97986	ctl 40.tif	GRB_B	1.03694	1.13038	VC2808	VC2808_S4	18H	CTL
Blue	5	Average	0.0414763	5843.27	38779	ctl 41.tif	GRB_B	0.590646	0.447358	VC2808	VC2808_S4	18H	CTL
Blue	6	Average	0.0642365	9885.56	114057	ctl 5.tif	GRB_B	0.999247	1.31577	VC2808	VC2808_S5	18H	CTL
Blue	23	Average	0.0533841	9727.82	78669.4	ctl 7.tif	GRB_B	0.983302	0.907537	VC2808	VC2808_S5	18H	CTL
Red	7	Average	0.0557857	16280.6	136923	05 l7 22.tif	GRB_R	0.925685	0.916309	VC2808	VC2808_S6	18H	L_05
Red	7	Average	0.066293	20425.5	208071	05 l7 24.tif	GRB_R	1.16136	1.39244	VC2808	VC2808_S6	18H	L_05
Red	8	Average	0.0834711	22793.2	281038	05 l7 3.tif	GRB_R	1.29598	1.88074	VC2808	VC2808_S7	18H	L_05
Red	8	Average	0.0479683	16546	117135	05 l7 51.tif	GRB_R	0.940775	0.783886	VC2808	VC2808_S8	18H	L_05
Red	9	Average	0.0497198	17388.9	149856	2 l7 13.tif	GRB_R	0.988702	1.00286	VC2808	VC2808_S9	18H	L_2
Red	9	Average	0.0516624	19152.7	143533	2 l7 15.tif	GRB_R	1.08899	0.96054	VC2808	VC2808_S9	18H	L_2
Red	9	Average	0.0517323	18263.7	145780	2 l7 16.tif	GRB_R	1.03844	0.975578	VC2808	VC2808_S9	18H	L_2
Red	10	Average	0.0470623	14335	91251.7	2 l7 26.tif	GRB_R	0.815064	0.610669	VC2808	VC2808_S10	18H	L_2
Red	10	Average	0.0332675	14582.8	63701.4	2 l7 30.tif	GRB_R	0.829152	0.426299	VC2808	VC2808_S10	18H	L_2
Red	11	Average	0.0435502	15004.3	96959.2	2 l7 53.tif	GRB_R	0.853117	0.648865	VC2808	VC2808_S11	18H	L_2
Red	11	Average	0.0464535	13612.1	92553.7	2 l7 55.tif	GRB_R	0.773959	0.619382	VC2808	VC2808_S11	18H	L_2
Red	11	Average	0.0487711	14875.6	106824	2 l7 57.tif	GRB_R	0.845797	0.714883	VC2808	VC2808_S11	18H	L_2
Red	13	Average	0.0417356	13056.7	86167.9	2 l7 62.tif	GRB_R	0.742378	0.576648	VC2808	VC2808_S12	18H	L_2
Red	13	Average	0.0326626	14386.9	64318.8	2 l7 64.tif	GRB_R	0.818015	0.430431	VC2808	VC2808_S12	18H	L_2
Blue	7	Average	0.0557857	10222	90269.5	05 l7 22.tif	GRB_B	1.03325	1.04136	VC2808	VC2808_S6	18H	L_05
Blue	7	Average	0.066293	8647.27	80421	05 l7 24.tif	GRB_B	0.874078	0.927744	VC2808	VC2808_S6	18H	L_05
Blue	8	Average	0.0834711	11499	150474	05 l7 3.tif	GRB_B	1.16233	1.73589	VC2808	VC2808_S7	18H	L_05
Blue	8	Average	0.0479683	7441.98	49297.7	05 l7 51.tif	GRB_B	0.752245	0.568703	VC2808	VC2808_S8	18H	L_05
Blue	9	Average	0.0497198	8969.63	58696	2 l7 13.tif	GRB_B	0.906663	0.677122	VC2808	VC2808_S9	18H	L_2
Blue	9	Average	0.0516624	7486.98	56608.6	2 l7 15.tif	GRB_B	0.756794	0.653042	VC2808	VC2808_S9	18H	L_2
Blue	9	Average	0.0517323	10466.1	73564.6	2 l7 16.tif	GRB_B	1.05793	0.848648	VC2808	VC2808_S9	18H	L_2
Blue	10	Average	0.0470623	6739.39	46945.9	2 l7 26.tif	GRB_B	0.681227	0.541573	VC2808	VC2808_S10	18H	L_2
Blue	10	Average	0.0332675	6995.04	31410.9	2 l7 30.tif	GRB_B	0.707069	0.362359	VC2808	VC2808_S10	18H	L_2
Blue	11	Average	0.0435502	11792.2	75738.8	2 l7 53.tif	GRB_B	1.19197	0.87373	VC2808	VC2808_S11	18H	L_2
Blue	11	Average	0.0464535	8948.19	60792.4	2 l7 55.tif	GRB_B	0.904495	0.701306	VC2808	VC2808_S11	18H	L_2
Blue	11	Average	0.0487711	9740.16	70391.4	2 l7 57.tif	GRB_B	0.984549	0.812042	VC2808	VC2808_S11	18H	L_2
Blue	13	Average	0.0417356	7499.48	50483	2 l7 62.tif	GRB_B	0.758058	0.582377	VC2808	VC2808_S12	18H	L_2
Blue	13	Average	0.0326626	5290.69	25199.6	2 l7 64.tif	GRB_B	0.53479	0.290705	VC2808	VC2808_S12	18H	L_2
Red	14	Average	0.0754869	22689.6	274574	mk 11.tif	GRB_R	1.29009	1.83749	VC2808	VC2808_S13	18H	MK_2
Red	14	Average	0.0592766	18707.9	161769	m 43.tif	GRB_R	1.06369	1.08258	VC2808	VC2808_S14	18H	MK_2
Red	15	Average	0.097262	29317.2	389346	mk 45.tif	GRB_R	1.66692	2.60556	VC2808	VC2808_S14	18H	MK_2
Red	15	Average	0.0701641	18453.4	190581	mk 47 bottom.tif	GRB_R	1.04923	1.27539	VC2808	VC2808_S14	18H	MK_2
Red	16	Average	0.0758095	20877	235458	mk 49.tif	GRB_R	1.18703	1.57572	VC2808	VC2808_S14	18H	MK_2
Red	16	Average	0.0657651	19634	187051	mk 66.tif	GRB_R	1.11635	1.25177	VC2808	VC2808_S15	18H	MK_2
Red	16	Average	0.0761147	20958.2	232077	mk 68.tif	GRB_R	1.19165	1.55309	VC2808	VC2808_S15	18H	MK_2
Red	16	Average	0.0622145	18925.8	177423	mk 72.tif	GRB_R	1.07609	1.18734	VC2808	VC2808_S15	18H	MK_2
Red	17	Average	0.0428477	17181.7	102292	mk 74.tif	GRB_R	0.976917	0.684555	VC2808	VC2808_S15	18H	MK_2
Red	17	Average	0.0595185	18520.5	163411	mk 9.tif	GRB_R	1.05304	1.09357	VC2808	VC2808_S13	18H	MK_2
Blue	14	Average	0.0754869	14190.9	146865	mk 11.tif	GRB_B	1.43444	1.69425	VC2808	VC2808_S13	18H	MK_2
Blue	14	Average	0.0592766	7830.98	75549.3	m 43.tif	GRB_B	0.791567	0.871544	VC2808	VC2808_S14	18H	MK_2
Blue	15	Average	0.097262	8558.02	116457	mk 45.tif	GRB_B	0.865057	1.34346	VC2808	VC2808_S14	18H	MK_2
Blue	15	Average	0.0701641	8236.4	88394.8	mk 47 bottom.tif	GRB_B	0.832547	1.01973	VC2808	VC2808_S14	18H	MK_2
Blue	16	Average	0.0758095	9914.63	114228	mk 49.tif	GRB_B	1.00219	1.31774	VC2808	VC2808_S14	18H	MK_2
Blue	16	Average	0.0657651	6893.31	66009.3	mk 66.tif	GRB_B	0.696786	0.761489	VC2808	VC2808_S15	18H	MK_2
Blue	16	Average	0.0761147	8770.93	102463	mk 68.tif	GRB_B	0.886578	1.18202	VC2808	VC2808_S15	18H	MK_2
Blue	16	Average	0.0622145	8031.28	75639.2	mk 72.tif	GRB_B	0.811813	0.872581	VC2808	VC2808_S15	18H	MK_2
Blue	17	Average	0.0428477	8445.71	52091.4	mk 74.tif	GRB_B	0.853704	0.600931	VC2808	VC2808_S15	18H	MK_2
Blue	17	Average	0.0595185	11005	109233	mk 9.tif	GRB_B	1.1124	1.26013	VC2808	VC2808_S13	18H	MK_2
Red	32	Average	0.0686245	12460.5	123369	Copy of ctl_10.tif	GRB_R	0.969091	1.01339	VC2819	VC2819_S1	18H	CTL
Red	36	Average	0.0639051	12668.3	124608	Copy of ctl_11.tif	GRB_R	0.985256	1.02357	VC2819	VC2819_S1	18H	CTL
Red	39	Average	0.0703276	13645.9	141212	Copy of ctl_12.tif	GRB_R	1.06128	1.15996	VC2819	VC2819_S1	18H	CTL
Red	41	Average	0.0667769	12617.5	127707	Copy of ctl_13.tif	GRB_R	0.981303	1.04903	VC2819	VC2819_S1	18H	CTL
Red	45	Average	0.0580669	13050.7	101705	Copy of ctl_20.tif	GRB_R	1.015	0.835435	VC2819	VC2819_S2	18H	CTL
Red	50	Average	0.0637319	12482.4	120742	Copy of ctl_28.tif	GRB_R	0.970794	0.991816	VC2819	VC2819_S3	18H	CTL
Red	51	Average	0.057341	12511.6	112145	Copy of ctl_29.tif	GRB_R	0.97307	0.921193	VC2819	VC2819_S3	18H	CTL
Red	53	Average	0.0607283	13426.3	122422	Copy of ctl_38.tif	GRB_R	1.0442	1.00561	VC2819	VC2819_S4	18H	CTL
Blue	32	Average	0.0686245	12452.5	131507	Copy of ctl_10.tif	GRB_B	0.994951	1.13145	VC2819	VC2819_S1	18H	CTL
Blue	36	Average	0.0639051	17758.5	159220	Copy of ctl_11.tif	GRB_B	1.4189	1.36988	VC2819	VC2819_S1	18H	CTL
Blue	39	Average	0.0703276	12017.9	125556	Copy of ctl_12.tif	GRB_B	0.960227	1.08025	VC2819	VC2819_S1	18H	CTL
Blue	41	Average	0.0667769	10910.2	95748.9	Copy of ctl_13.tif	GRB_B	0.871719	0.823797	VC2819	VC2819_S1	18H	CTL
Blue	45	Average	0.0580669	7640.64	67460.4	Copy of ctl_20.tif	GRB_B	0.610484	0.580411	VC2819	VC2819_S2	18H	CTL
Blue	50	Average	0.0637319	11264.4	109286	Copy of ctl_28.tif	GRB_B	0.900024	0.940266	VC2819	VC2819_S3	18H	CTL
Blue	51	Average	0.057341	12658.8	108285	Copy of ctl_29.tif	GRB_B	1.01143	0.931655	VC2819	VC2819_S3	18H	CTL
Blue	53	Average	0.0607283	15422.7	132767	Copy of ctl_38.tif	GRB_B	1.23227	1.14229	VC2819	VC2819_S4	18H	CTL
Red	57	Average	0.0831412	17272	206467	Copy of L_15.tif	GRB_R	1.3433	1.69599	VC2819	VC2819_S5	18H	L_2
Red	1	Average	0.053228	9852.59	75999.9	Copy of L_17.tif	GRB_R	0.766269	0.624287	VC2819	VC2819_S5	18H	L_2
Red	12	Average	0.0912029	14526.4	199049	Copy of L_25.tif	GRB_R	1.12976	1.63505	VC2819	VC2819_S6	18H	L_2
Red	15	Average	0.0756397	14146.2	155998	Copy of L_30.tif	GRB_R	1.1002	1.28142	VC2819	VC2819_S7	18H	L_2
Red	21	Average	0.0620715	12044.7	111990	Copy of L_33.tif	GRB_R	0.936757	0.919917	VC2819	VC2819_S7	18H	L_2
Red	29	Average	0.0715467	12136.9	130684	Copy of L_46.tif	GRB_R	0.943928	1.07348	VC2819	VC2819_S10	18H	L_2
Red	31	Average	0.0601839	12482.5	110046	Copy of L_47.tif	GRB_R	0.970803	0.903953	VC2819	VC2819_S10	18H	L_2
Red	33	Average	0.057407	11663.7	106663	Copy of L_57.tif	GRB_R	0.907128	0.876164	VC2819	VC2819_S11	18H	L_2
Red	34	Average	0.0606286	11179.3	96900	Copy of L_58.tif	GRB_R	0.869454	0.795967	VC2819	VC2819_S11	18H	L_2
Red	36	Average	0.0597747	15146.8	135597	Copy of L_59.tif	GRB_R	1.17802	1.11383	VC2819	VC2819_S11	18H	L_2
Blue	57	Average	0.0831412	14537.5	196126	Copy of L_15.tif	GRB_B	1.16154	1.68742	VC2819	VC2819_S5	18H	L_2
Blue	1	Average	0.053228	8759.19	67795.4	Copy of L_17.tif	GRB_B	0.699856	0.583293	VC2819	VC2819_S5	18H	L_2
Blue	12	Average	0.0912029	13263.3	201859	Copy of L_25.tif	GRB_B	1.05973	1.73674	VC2819	VC2819_S6	18H	L_2
Blue	15	Average	0.0756397	12497.6	135338	Copy of L_30.tif	GRB_B	0.998555	1.16441	VC2819	VC2819_S7	18H	L_2
Blue	21	Average	0.0620715	10643.8	101259	Copy of L_33.tif	GRB_B	0.850433	0.871202	VC2819	VC2819_S7	18H	L_2
Blue	29	Average	0.0715467	10897.9	120862	Copy of L_46.tif	GRB_B	0.870735	1.03986	VC2819	VC2819_S10	18H	L_2
Blue	31	Average	0.0601839	12203.2	112618	Copy of L_47.tif	GRB_B	0.975033	0.968933	VC2819	VC2819_S10	18H	L_2
Blue	33	Average	0.057407	12037.1	115069	Copy of L_57.tif	GRB_B	0.961759	0.990021	VC2819	VC2819_S11	18H	L_2
Blue	34	Average	0.0606286	12131.9	101253	Copy of L_58.tif	GRB_B	0.969337	0.871155	VC2819	VC2819_S11	18H	L_2
Blue	36	Average	0.0597747	11608.9	103414	Copy of L_59.tif	GRB_B	0.927544	0.889748	VC2819	VC2819_S11	18H	L_2
Red	2	Average	0.0880681	12978	163234	Copy of m_41.tif	GRB_R	1.00934	1.34085	VC2819	VC2819_S13	18H	MK_1
Red	5	Average	0.0818215	13722.9	169854	Copy of m_51.tif	GRB_R	1.06727	1.39523	VC2819	VC2819_S14	18H	MK_1
Red	51	Average	0.0950611	13674.3	180546	Copy of m_52.tif	GRB_R	1.06349	1.48306	VC2819	VC2819_S14	18H	MK_1
Red	8	Average	0.0615176	12101.7	109379	Copy of m_54.tif	GRB_R	0.941191	0.898477	VC2819	VC2819_S14	18H	MK_1
Red	10	Average	0.0925019	15545.2	214128	Copy of m_55.tif	GRB_R	1.20901	1.75891	VC2819	VC2819_S14	18H	MK_1
Red	55	Average	0.0825302	14609.8	178386	Copy of m_60.tif	GRB_R	1.13625	1.46532	VC2819	VC2819_S15	18H	MK_1
Red	13	Average	0.0568366	14402.9	118969	Copy of m_62.tif	GRB_R	1.12016	0.97725	VC2819	VC2819_S15	18H	MK_1
Red	57	Average	0.104397	16942.9	257337	Copy of m_63.tif	GRB_R	1.31771	2.11384	VC2819	VC2819_S15	18H	MK_1
Red	15	Average	0.0946963	16572.4	234184	Copy of m_7.tif	GRB_R	1.28889	1.92366	VC2819	VC2819_S12	18H	MK_1
Red	16	Average	0.0758406	14782.8	165852	Copy of m_9.tif	GRB_R	1.14971	1.36236	VC2819	VC2819_S12	18H	MK_1
Blue	2	Average	0.0880681	10362.6	138541	Copy of m_41.tif	GRB_B	0.827966	1.19197	VC2819	VC2819_S13	18H	MK_1
Blue	5	Average	0.0818215	7906.22	110374	Copy of m_51.tif	GRB_B	0.631703	0.949624	VC2819	VC2819_S14	18H	MK_1
Blue	51	Average	0.0950611	9758.52	167794	Copy of m_52.tif	GRB_B	0.779702	1.44366	VC2819	VC2819_S14	18H	MK_1
Blue	8	Average	0.0615176	11681.3	107114	Copy of m_54.tif	GRB_B	0.933334	0.921583	VC2819	VC2819_S14	18H	MK_1
Blue	10	Average	0.0925019	13967.2	197071	Copy of m_55.tif	GRB_B	1.11598	1.69555	VC2819	VC2819_S14	18H	MK_1
Blue	55	Average	0.0825302	10741.2	133200	Copy of m_60.tif	GRB_B	0.858219	1.14602	VC2819	VC2819_S15	18H	MK_1
Blue	13	Average	0.0568366	9221.99	75809.7	Copy of m_62.tif	GRB_B	0.736833	0.652246	VC2819	VC2819_S15	18H	MK_1
Blue	57	Average	0.104397	11628.1	189435	Copy of m_63.tif	GRB_B	0.929078	1.62985	VC2819	VC2819_S15	18H	MK_1
Blue	15	Average	0.0946963	15895	253813	Copy of m_7.tif	GRB_B	1.27	2.18374	VC2819	VC2819_S12	18H	MK_1
Blue	16	Average	0.0758406	13462.7	158113	Copy of m_9.tif	GRB_B	1.07566	1.36036	VC2819	VC2819_S12	18H	MK_1
Red	34	Average	0.0632838	11041.6	103273	ctl_10.tif	GRB_R	1.0962	1.19383	VC2820	VC2820_S1	18H	CTL
Red	44	Average	0.0562523	10080.1	84571.7	ctl_19.tif	GRB_R	1.00074	0.977642	VC2820	VC2820_S2	18H	CTL
Red	47	Average	0.0466609	10591.7	73797.5	ctl_20.tif	GRB_R	1.05153	0.853094	VC2820	VC2820_S2	18H	CTL
Red	49	Average	0.0495276	9686.71	67824.8	ctl_2.tif	GRB_R	0.961688	0.784049	VC2820	VC2820_S3	18H	CTL
Red	50	Average	0.0689544	12288.1	124136	ctl_3.tif	GRB_R	1.21995	1.435	VC2820	VC2820_S3	18H	CTL
Red	51	Average	0.0562523	8622.04	71864.4	ctl_4.tif	GRB_R	0.855988	0.830747	VC2820	VC2820_S3	18H	CTL
Red	53	Average	0.0725836	9244.65	104355	ctl_8.tif	GRB_R	0.9178	1.20634	VC2820	VC2820_S1	18H	CTL
Red	55	Average	0.0488543	9026.02	62223.6	ctl_9.tif	GRB_R	0.896095	0.7193	VC2820	VC2820_S1	18H	CTL
Blue	34	Average	0.0632838	9280.77	85244.5	ctl_10.tif	GRB_B	0.96793	0.995561	VC2820	VC2820_S1	18H	CTL
Blue	44	Average	0.0562523	8871.87	74534.4	ctl_19.tif	GRB_B	0.925284	0.870479	VC2820	VC2820_S2	18H	CTL
Blue	47	Average	0.0466609	10001.2	73940.4	ctl_20.tif	GRB_B	1.04307	0.863542	VC2820	VC2820_S2	18H	CTL
Blue	49	Average	0.0495276	11066.8	89701.4	ctl_2.tif	GRB_B	1.1542	1.04761	VC2820	VC2820_S3	18H	CTL
Blue	50	Average	0.0689544	9606.36	103830	ctl_3.tif	GRB_B	1.00189	1.21262	VC2820	VC2820_S3	18H	CTL
Blue	51	Average	0.0562523	8689.46	91709.3	ctl_4.tif	GRB_B	0.90626	1.07106	VC2820	VC2820_S3	18H	CTL
Blue	53	Average	0.0725836	8479.29	90496.1	ctl_8.tif	GRB_B	0.88434	1.05689	VC2820	VC2820_S1	18H	CTL
Blue	55	Average	0.0488543	10710.4	75540.2	ctl_9.tif	GRB_B	1.11703	0.882225	VC2820	VC2820_S1	18H	CTL
Red	0	Average	0.0617997	11562.2	104199	L_16.tif	GRB_R	1.14788	1.20454	VC2820	VC2820_S2	18H	L_2
Red	2	Average	0.0666862	12351.4	114642	L_21.tif	GRB_R	1.22623	1.32525	VC2820	VC2820_S3	18H	L_2
Red	3	Average	0.0698828	11583.1	117651	L_22.tif	GRB_R	1.14996	1.36004	VC2820	VC2820_S3	18H	L_2
Red	6	Average	0.0735847	10796.4	122170	L_5.tif	GRB_R	1.07186	1.41228	VC2820	VC2820_S4	18H	L_2
Red	8	Average	0.0544377	12881.4	108656	L_6.tif	GRB_R	1.27886	1.25606	VC2820	VC2820_S4	18H	L_2
Red	9	Average	0.0733901	14724.3	156493	L_7.tif	GRB_R	1.46181	1.80905	VC2820	VC2820_S4	18H	L_2
Blue	0	Average	0.0617997	12568.8	118925	L_16.tif	GRB_B	1.31086	1.38891	VC2820	VC2820_S2	18H	L_2
Blue	2	Average	0.0666862	10667.1	110079	L_21.tif	GRB_B	1.11252	1.2856	VC2820	VC2820_S3	18H	L_2
Blue	3	Average	0.0698828	11783.8	130791	L_22.tif	GRB_B	1.22898	1.5275	VC2820	VC2820_S3	18H	L_2
Blue	6	Average	0.0735847	10948.5	155966	L_5.tif	GRB_B	1.14186	1.82151	VC2820	VC2820_S4	18H	L_2
Blue	8	Average	0.0544377	9272.66	75172.6	L_6.tif	GRB_B	0.967085	0.877932	VC2820	VC2820_S4	18H	L_2
Blue	9	Average	0.0733901	10679.2	120882	L_7.tif	GRB_B	1.11377	1.41177	VC2820	VC2820_S4	18H	L_2
Red	16	Average	0.073224	12336.1	127262	MK_23.tif	GRB_R	1.22472	1.47114	VC2820	VC2820_S4	18H	MK_1
Red	17	Average	0.0584125	11074.7	97547.4	MK_24.tif	GRB_R	1.09949	1.12764	VC2820	VC2820_S4	18H	MK_1
Blue	16	Average	0.073224	11707.8	121896	MK_23.tif	GRB_B	1.22106	1.42361	VC2820	VC2820_S4	18H	MK_1
Blue	17	Average	0.0584125	14163.4	130750	MK_24.tif	GRB_B	1.47716	1.52701	VC2820	VC2820_S4	18H	MK_1
Red	48	Average	0.0950185	17678	242284	ctl_16.tif	GRB_R	1.14603	1.33394	VC2821	VC2821_S1	18H	CTL
Red	51	Average	0.103432	23461.6	374991	ctl_17.tif	GRB_R	1.52097	2.06458	VC2821	VC2821_S1	18H	CTL
Red	52	Average	0.096707	18781.1	268499	ctl_18.tif	GRB_R	1.21754	1.47827	VC2821	VC2821_S1	18H	CTL
Red	55	Average	0.0785222	13884	161022	ctl_7.tif	GRB_R	0.900075	0.886538	VC2821	VC2821_S2	18H	CTL
Red	56	Average	0.0590346	12675.6	109785	ctl_8.tif	GRB_R	0.821737	0.604442	VC2821	VC2821_S2	18H	CTL
Red	13	Average	0.0555051	12982.5	101868	ctl_28.tif	GRB_R	0.841631	0.560851	VC2821	VC2821_S3	18H	CTL
Red	15	Average	0.0607063	11078.7	90790.7	ctk_29.tif	GRB_R	0.718212	0.499864	VC2821	VC2821_S3	18H	CTL
Red	16	Average	0.0559321	12861.7	103806	ctl_30.tif	GRB_R	0.833801	0.57152	VC2821	VC2821_S3	18H	CTL
Blue	48	Average	0.0950185	7525.02	104655	ctl_16.tif	GRB_B	0.917039	1.12511	VC2821	VC2821_S1	18H	CTL
Blue	51	Average	0.103432	10476.5	147839	ctl_17.tif	GRB_B	1.27672	1.58937	VC2821	VC2821_S1	18H	CTL
Blue	52	Average	0.096707	10597.9	163491	ctl_18.tif	GRB_B	1.29151	1.75763	VC2821	VC2821_S1	18H	CTL
Blue	55	Average	0.0785222	7041.12	74092.2	ctl_7.tif	GRB_B	0.858068	0.79654	VC2821	VC2821_S2	18H	CTL
Blue	57	Average	0.0590346	7769.64	64530.4	ctl_8.tif	GRB_B	0.946849	0.693744	VC2821	VC2821_S2	18H	CTL
Blue	13	Average	0.0555051	7586.28	62569.8	ctl_28.tif	GRB_B	0.924504	0.672666	VC2821	VC2821_S3	18H	CTL
Blue	15	Average	0.0607063	7742.6	64448.8	ctk_29.tif	GRB_B	0.943554	0.692867	VC2821	VC2821_S3	18H	CTL
Blue	16	Average	0.0559321	6907.25	62515.1	ctl_30.tif	GRB_B	0.841753	0.672078	VC2821	VC2821_S3	18H	CTL
Red	19	Average	0.0575484	14298.9	116425	L_19.tif	GRB_R	0.926974	0.640996	VC2821	VC2821_S4	18H	L_2
Red	21	Average	0.0563919	10663	84308.1	L_1.tif	GRB_R	0.691262	0.464173	VC2821	VC2821_S5	18H	L_2
Red	23	Average	0.0622145	13611.3	119639	L_21.tif	GRB_R	0.882396	0.658696	VC2821	VC2821_S4	18H	L_2
Red	25	Average	0.0838011	13904.9	163507	L_22.tif	GRB_R	0.901429	0.900216	VC2821	VC2821_S4	18H	L_2
Red	29	Average	0.0598815	14398.1	122642	L_24.tif	GRB_R	0.933402	0.675226	VC2821	VC2821_S6	18H	L_2
Red	31	Average	0.0454602	12308.8	79452	L_25.tif	GRB_R	0.797955	0.437437	VC2821	VC2821_S6	18H	L_2
Red	34	Average	0.0682946	10286.4	99306.3	L_3.tif	GRB_R	0.666847	0.546748	VC2821	VC2821_S5	18H	L_2
Blue	19	Average	0.0575484	6139.6	46623.4	L_19.tif	GRB_B	0.748204	0.501232	VC2821	VC2821_S4	18H	L_2
Blue	21	Average	0.0563919	7656.48	57961.4	L_1.tif	GRB_B	0.933059	0.623123	VC2821	VC2821_S5	18H	L_2
Blue	23	Average	0.0622145	7542.18	68035.8	L_21.tif	GRB_B	0.91913	0.73143	VC2821	VC2821_S4	18H	L_2
Blue	25	Average	0.0838011	9618.41	107034	L_22.tif	GRB_B	1.17215	1.15068	VC2821	VC2821_S4	18H	L_2
Blue	29	Average	0.0598815	7687.97	66600.9	L_24.tif	GRB_B	0.936896	0.716003	VC2821	VC2821_S6	18H	L_2
Blue	31	Average	0.0454602	6967.6	45316.1	L_25.tif	GRB_B	0.849108	0.487178	VC2821	VC2821_S6	18H	L_2
Blue	34	Average	0.0682946	6857.79	65814.3	L_3.tif	GRB_B	0.835726	0.707547	VC2821	VC2821_S5	18H	L_2
Red	36	Average	0.0748169	16580.8	174178	mk_11.tif	GRB_R	1.0749	0.958965	VC2821	VC2821_S7	18H	MK_1
Red	39	Average	0.0907295	18842.8	286577	mk_12.tif	GRB_R	1.22154	1.5778	VC2821	VC2821_S7	18H	MK_1
Red	41	Average	0.0852857	21775.1	258868	mk_13.tif	GRB_R	1.41164	1.42524	VC2821	VC2821_S8	18H	MK_1
Red	43	Average	0.0792689	18796.6	207325	mk_14.tif	GRB_R	1.21855	1.14146	VC2821	VC2821_S8	18H	MK_1
Red	47	Average	0.0689544	15224.6	151705	mk_9.tif	GRB_R	0.986979	0.835236	VC2821	VC2821_S7	18H	MK_1
Blue	36	Average	0.0748169	5243.03	56229.3	mk_11.tif	GRB_B	0.638943	0.604502	VC2821	VC2821_S7	18H	MK_1
Blue	39	Average	0.0907295	9814.91	136167	mk_12.tif	GRB_B	1.1961	1.46388	VC2821	VC2821_S7	18H	MK_1
Blue	41	Average	0.0852857	7669.85	94701.3	mk_13.tif	GRB_B	0.934688	1.0181	VC2821	VC2821_S8	18H	MK_1
Blue	43	Average	0.0792689	8206.05	97728.8	mk_14.tif	GRB_B	1.00003	1.05065	VC2821	VC2821_S8	18H	MK_1
Blue	47	Average	0.0689544	8867.46	95668.2	mk_9.tif	GRB_B	1.08063	1.0285	VC2821	VC2821_S7	18H	MK_1
Red	37	Average	0.0599926	15357.1	136154	ctl_12.tif	GRB_R	1.00388	0.916533	VC2822	VC2822_S1	24H	CTL
Red	39	Average	0.0653252	16352.3	162350	ctl_13.tif	GRB_R	1.06894	1.09287	VC2822	VC2822_S1	24H	CTL
Red	41	Average	0.0614169	14657.9	123806	ctl_14.tif	GRB_R	0.958182	0.833409	VC2822	VC2822_S1	24H	CTL
Red	42	Average	0.060359	16520.3	149278	ctl_16.tif	GRB_R	1.07993	1.00488	VC2822	VC2822_S1	24H	CTL
Red	43	Average	0.0659137	12615.3	136084	ctl_21.tif	GRB_R	0.824656	0.91606	VC2822	VC2822_S2	24H	CTL
Red	45	Average	0.0601083	14148.6	125082	ctl_22.tif	GRB_R	0.924889	0.842	VC2822	VC2822_S2	24H	CTL
Red	47	Average	0.0631632	15738.4	156719	ctl_23.tif	GRB_R	1.02881	1.05497	VC2822	VC2822_S2	24H	CTL
Red	48	Average	0.076616	16991.2	198954	ctl_3.tif	GRB_R	1.11071	1.33928	VC2822	VC2822_S3	24H	CTL
Blue	37	Average	0.0599926	14449.3	133079	ctl_12.tif	GRB_B	1.31738	1.26312	VC2822	VC2822_S1	24H	CTL
Blue	39	Average	0.0653252	10593.9	105481	ctl_13.tif	GRB_B	0.965879	1.00117	VC2822	VC2822_S1	24H	CTL
Blue	41	Average	0.0614169	12050.9	103418	ctl_14.tif	GRB_B	1.09871	0.981589	VC2822	VC2822_S1	24H	CTL
Blue	42	Average	0.060359	7807.1	74238.2	ctl_16.tif	GRB_B	0.711795	0.704633	VC2822	VC2822_S1	24H	CTL
Blue	43	Average	0.0659137	10212.2	99099.8	ctl_21.tif	GRB_B	0.931076	0.940607	VC2822	VC2822_S2	24H	CTL
Blue	45	Average	0.0601083	8063.88	72471.2	ctl_22.tif	GRB_B	0.735206	0.687862	VC2822	VC2822_S2	24H	CTL
Blue	47	Average	0.0631632	13852.5	145813	ctl_23.tif	GRB_B	1.26297	1.38399	VC2822	VC2822_S2	24H	CTL
Blue	48	Average	0.076616	10715.8	109259	ctl_3.tif	GRB_B	0.976985	1.03703	VC2822	VC2822_S3	24H	CTL
Red	53	Average	0.0584701	16174.4	134564	L_10.tif	GRB_R	1.05731	0.90583	VC2822	VC2822_S4	24H	L_2
Red	55	Average	0.0473245	14316.6	97573.2	L_17.tif	GRB_R	0.935872	0.656822	VC2822	VC2822_S5	24H	L_2
Red	57	Average	0.0560413	13143.2	108472	L_18.tif	GRB_R	0.859164	0.730187	VC2822	VC2822_S5	24H	L_2
Red	58	Average	0.0413168	12198.3	72799.4	L_19.tif	GRB_R	0.797401	0.490055	VC2822	VC2822_S5	24H	L_2
Red	0	Average	0.0583693	14362.9	119850	L_20.tif	GRB_R	0.938899	0.806779	VC2822	VC2822_S5	24H	L_2
Red	1	Average	0.0548732	13189.6	113833	L_7.tif	GRB_R	0.862199	0.766276	VC2822	VC2822_S4	24H	L_2
Red	3	Average	0.0566843	17097.8	148904	L_8.tif	GRB_R	1.11768	1.00236	VC2822	VC2822_S4	24H	L_2
Red	6	Average	0.0561851	14913.4	123249	L_9.tif	GRB_R	0.974885	0.829658	VC2822	VC2822_S4	24H	L_2
Blue	53	Average	0.0584701	9230.93	89135.2	L_10.tif	GRB_B	0.84161	0.846028	VC2822	VC2822_S4	24H	L_2
Blue	55	Average	0.0473245	10099.9	61773.7	L_17.tif	GRB_B	0.920837	0.586326	VC2822	VC2822_S5	24H	L_2
Blue	57	Average	0.0560413	8655.71	72448.8	L_18.tif	GRB_B	0.789165	0.687649	VC2822	VC2822_S5	24H	L_2
Blue	58	Average	0.0413168	9863.81	65330.7	L_19.tif	GRB_B	0.899311	0.620088	VC2822	VC2822_S5	24H	L_2
Blue	0	Average	0.0583693	10942.1	91857	L_20.tif	GRB_B	0.99762	0.871862	VC2822	VC2822_S5	24H	L_2
Blue	1	Average	0.0548732	10552.6	79697.2	L_7.tif	GRB_B	0.962106	0.756448	VC2822	VC2822_S4	24H	L_2
Blue	3	Average	0.0566843	9816	74598.5	L_8.tif	GRB_B	0.894952	0.708053	VC2822	VC2822_S4	24H	L_2
Blue	6	Average	0.0561851	9612.45	90057.3	L_9.tif	GRB_B	0.876393	0.85478	VC2822	VC2822_S4	24H	L_2
Red	9	Average	0.0630919	14045.8	158005	MK_1.tif	GRB_R	0.918172	1.06362	VC2822	VC2822_S5	24H	MK_2
Red	10	Average	0.0860634	16575	210007	MK_24.tif	GRB_R	1.0835	1.41368	VC2822	VC2822_S6	24H	MK_2
Red	12	Average	0.0762128	14456.9	162171	MK_2.tif	GRB_R	0.945041	1.09167	VC2822	VC2822_S5	24H	MK_2
Blue	9	Average	0.0630919	7894.18	77140.5	MK_1.tif	GRB_B	0.719735	0.732181	VC2822	VC2822_S5	24H	MK_2
Blue	10	Average	0.0860634	15216.1	205104	MK_24.tif	GRB_B	1.3873	1.94674	VC2822	VC2822_S6	24H	MK_2
Blue	12	Average	0.0762128	8310.91	96643.9	MK_2.tif	GRB_B	0.757728	0.917297	VC2822	VC2822_S5	24H	MK_2
Red	23	Average	0.0865627	14578.7	184606	ctl_10.tif	GRB_R	1.00369	0.987293	VC2823	VC2823_S1	24H	CTL
Red	26	Average	0.103432	12026.7	177086	ctl_11.tif	GRB_R	0.827993	0.947077	VC2823	VC2823_S2	24H	CTL
Red	27	Average	0.0714948	18357.2	193317	ctl_12.tif	GRB_R	1.26383	1.03388	VC2823	VC2823_S2	24H	CTL
Red	28	Average	0.0924486	14379.7	201142	ctl_1.tif	GRB_R	0.989989	1.07573	VC2823	VC2823_S3	24H	CTL
Red	30	Average	0.0759708	10672.7	113793	ctl_2.tif	GRB_R	0.734777	0.608579	VC2823	VC2823_S3	24H	CTL
Red	33	Average	0.0994664	17135.6	251948	ctl_9_maybedrop.tif	GRB_R	1.17972	1.34744	VC2823	VC2823_S1	24H	CTL
Blue	23	Average	0.0865627	18379.8	233671	ctl_10.tif	GRB_B	1.32699	1.28849	VC2823	VC2823_S1	24H	CTL
Blue	26	Average	0.103432	14733.4	227745	ctl_11.tif	GRB_B	1.06373	1.25582	VC2823	VC2823_S2	24H	CTL
Blue	27	Average	0.0714948	15017	157626	ctl_12.tif	GRB_B	1.0842	0.869169	VC2823	VC2823_S2	24H	CTL
Blue	28	Average	0.0924486	9873.1	139027	ctl_1.tif	GRB_B	0.712822	0.766611	VC2823	VC2823_S3	24H	CTL
Blue	30	Average	0.0759708	11552.6	117873	ctl_2.tif	GRB_B	0.834082	0.649965	VC2823	VC2823_S3	24H	CTL
Blue	33	Average	0.0994664	13548.5	212173	ctl_9_maybedrop.tif	GRB_B	0.978177	1.16995	VC2823	VC2823_S1	24H	CTL
Red	49	Average	0.0808431	11871.3	139300	L_17.tif	GRB_R	0.817295	0.744993	VC2823	VC2823_S8	24H	L_1
Red	46	Average	0.104409	17672.9	271304	L_18.tif	GRB_R	1.21671	1.45096	VC2823	VC2823_S8	24H	L_1
Red	46	Average	0.0993488	14690.3	212789	L_6.tif	GRB_R	1.01138	1.13802	VC2823	VC2823_S9	24H	L_1
Red	47	Average	0.0992538	17076	253578	L_7.tif	GRB_R	1.17562	1.35616	VC2823	VC2823_S9	24H	L_1
Blue	49	Average	0.0808431	11953.4	136349	L_17.tif	GRB_B	0.863016	0.751849	VC2823	VC2823_S8	24H	L_1
Blue	46	Average	0.104409	15300.9	241891	L_18.tif	GRB_B	1.1047	1.33382	VC2823	VC2823_S8	24H	L_1
Blue	46	Average	0.0993488	14690.1	228959	L_6.tif	GRB_B	1.0606	1.26251	VC2823	VC2823_S9	24H	L_1
Blue	47	Average	0.0992538	14600.4	213122	L_7.tif	GRB_B	1.05413	1.17519	VC2823	VC2823_S9	24H	L_1
Red	35	Average	0.100407	17845.6	280617	m_13.tif	GRB_R	1.2286	1.50077	VC2823	VC2823_S5	24H	MK_1
Red	37	Average	0.105246	18868.3	293517	m_14.tif	GRB_R	1.29901	1.56976	VC2823	VC2823_S5	24H	MK_1
Red	39	Average	0.107459	16011.3	252851	m_15.tif	GRB_R	1.10232	1.35227	VC2823	VC2823_S6	24H	MK_1
Red	40	Average	0.102319	18633.6	300643	m_16.tif	GRB_R	1.28286	1.60787	VC2823	VC2823_S6	24H	MK_1
Red	42	Average	0.114017	14126.4	235176	m_4.tif	GRB_R	0.972553	1.25775	VC2823	VC2823_S7	24H	MK_1
Red	44	Average	0.114963	21362.9	360208	m_5.tif	GRB_R	1.47076	1.92643	VC2823	VC2823_S7	24H	MK_1
Blue	35	Average	0.100407	16944.4	268985	m_13.tif	GRB_B	1.22336	1.48322	VC2823	VC2823_S5	24H	MK_1
Blue	37	Average	0.105246	18617.5	297851	m_14.tif	GRB_B	1.34415	1.64239	VC2823	VC2823_S5	24H	MK_1
Blue	39	Average	0.107459	16500	261889	m_15.tif	GRB_B	1.19127	1.44409	VC2823	VC2823_S6	24H	MK_1
Blue	40	Average	0.102319	12417.7	201887	m_16.tif	GRB_B	0.896538	1.11323	VC2823	VC2823_S6	24H	MK_1
Blue	42	Average	0.114017	16152.9	287027	m_4.tif	GRB_B	1.16621	1.58271	VC2823	VC2823_S7	24H	MK_1
Blue	44	Average	0.114963	12309.5	209924	m_5.tif	GRB_B	0.888727	1.15755	VC2823	VC2823_S7	24H	MK_1
Red	0	Average	0.0505744	11729.1	84962.7	ctl_11.tif	GRB_R	0.750288	0.601652	VC2826	VC2826_S1	24H	CTL
Red	3	Average	0.0569208	17842.6	149388	ctl_6.tif	GRB_R	1.14136	1.05787	VC2826	VC2826_S2	24H	CTL
Red	5	Average	0.0606286	15032.4	135820	ctl_7.tif	GRB_R	0.961596	0.961794	VC2826	VC2826_S2	24H	CTL
Red	7	Average	0.0525861	14143.1	112714	ctl_8.tif	GRB_R	0.904708	0.798168	VC2826	VC2826_S1	24H	CTL
Red	9	Average	0.0779485	19416.7	223194	ctl_9.tif	GRB_R	1.24205	1.58052	VC2826	VC2826_S1	24H	CTL
Blue	0	Average	0.0505744	7060.68	51544.4	ctl_11.tif	GRB_B	0.760998	0.575685	VC2826	VC2826_S1	24H	CTL
Blue	3	Average	0.0569208	8097.15	82752.5	ctl_6.tif	GRB_B	0.87271	0.924241	VC2826	VC2826_S2	24H	CTL
Blue	5	Average	0.0606286	8107.74	84466.8	ctl_7.tif	GRB_B	0.87385	0.943387	VC2826	VC2826_S2	24H	CTL
Blue	7	Average	0.0525861	9536.03	69373.5	ctl_8.tif	GRB_B	1.02779	0.774814	VC2826	VC2826_S1	24H	CTL
Blue	9	Average	0.0779485	13589.3	159541	ctl_9.tif	GRB_B	1.46465	1.78187	VC2826	VC2826_S1	24H	CTL
Red	23	Average	0.0461632	11958.6	82164.8	L_19.tif	GRB_R	0.764971	0.581838	VC2826	VC2826_S6	24H	L_05
Red	24	Average	0.055993	13453.7	115733	L_1.tif	GRB_R	0.860611	0.819549	VC2826	VC2826_S7	24H	L_05
Red	25	Average	0.0471793	16019	114511	L_21.tif	GRB_R	1.0247	0.810891	VC2826	VC2826_S6	24H	L_05
Red	27	Average	0.0473928	13862.9	90951.5	L_23.tif	GRB_R	0.886782	0.64406	VC2826	VC2826_S8	24H	L_05
Red	29	Average	0.0467761	15720.6	104658	L_24.tif	GRB_R	1.00562	0.741119	VC2826	VC2826_S8	24H	L_05
Red	30	Average	0.0602664	15876.1	138303	L_2.tif	GRB_R	1.01556	0.979376	VC2826	VC2826_S7	24H	L_05
Blue	23	Average	0.0461632	11292.7	80142	L_19.tif	GRB_B	1.21713	0.895084	VC2826	VC2826_S6	24H	L_05
Blue	24	Average	0.055993	12097.7	117865	L_1.tif	GRB_B	1.30389	1.3164	VC2826	VC2826_S7	24H	L_05
Blue	25	Average	0.0471793	8457.95	54978.6	L_21.tif	GRB_B	0.911596	0.614041	VC2826	VC2826_S6	24H	L_05
Blue	27	Average	0.0473928	9940.32	72081.9	L_23.tif	GRB_B	1.07137	0.805063	VC2826	VC2826_S8	24H	L_05
Blue	29	Average	0.0467761	7749.76	49911.6	L_24.tif	GRB_B	0.835268	0.557449	VC2826	VC2826_S8	24H	L_05
Blue	30	Average	0.0602664	9415.7	79459.8	L_2.tif	GRB_B	1.01482	0.887465	VC2826	VC2826_S7	24H	L_05
Red	11	Average	0.0721566	22649.7	246686	mk_13.tif	GRB_R	1.44886	1.74687	VC2826	VC2826_S3	24H	MK_05
Red	13	Average	0.0559321	16689.5	139821	mk_14.tif	GRB_R	1.0676	0.99012	VC2826	VC2826_S3	24H	MK_05
Red	15	Average	0.060741	19483.7	173497	mk_15.tif	GRB_R	1.24634	1.22859	VC2826	VC2826_S3	24H	MK_05
Red	16	Average	0.0537119	14973.9	109830	mk_17.tif	GRB_R	0.95785	0.777745	VC2826	VC2826_S4	24H	MK_05
Red	18	Average	0.0476063	14733.9	103102	mk_18.tif	GRB_R	0.9425	0.730105	VC2826	VC2826_S4	24H	MK_05
Red	20	Average	0.0560646	13670.5	105693	mk_4.tif	GRB_R	0.87448	0.748453	VC2826	VC2826_S5	24H	MK_05
Red	21	Average	0.0552752	14951.9	115932	mk_5.tif	GRB_R	0.956445	0.820957	VC2826	VC2826_S5	24H	MK_05
Blue	11	Average	0.0721566	11676.7	131981	mk_13.tif	GRB_B	1.25851	1.47406	VC2826	VC2826_S3	24H	MK_05
Blue	13	Average	0.0559321	8615.79	70896.4	mk_14.tif	GRB_B	0.928607	0.791823	VC2826	VC2826_S3	24H	MK_05
Blue	15	Average	0.060741	12331.9	114239	mk_15.tif	GRB_B	1.32913	1.2759	VC2826	VC2826_S3	24H	MK_05
Blue	16	Average	0.0537119	9568.5	72069	mk_17.tif	GRB_B	1.03129	0.804919	VC2826	VC2826_S4	24H	MK_05
Blue	18	Average	0.0476063	9480.73	66445.9	mk_18.tif	GRB_B	1.02183	0.742116	VC2826	VC2826_S4	24H	MK_05
Blue	20	Average	0.0560646	10160.8	79478.3	mk_4.tif	GRB_B	1.09513	0.887672	VC2826	VC2826_S5	24H	MK_05
Blue	21	Average	0.0552752	8319.4	65987.5	mk_5.tif	GRB_B	0.896663	0.736997	VC2826	VC2826_S5	24H	MK_05
Red	1	Average	0.0743982	15537.7	158966	Copy of Image 16_Maximum intensity projection.tif	GRB_R	1.07884	1.01159	VC2827	VC2827_S3	24H	CTL
Red	3	Average	0.0831412	15184.4	187087	Copy of Image 1_Maximum intensity projection.tif	GRB_R	1.05431	1.19054	VC2827	VC2827_S1	24H	CTL
Red	8	Average	0.0776974	13634.4	154748	Copy of Image 3_Maximum intensity projection.tif	GRB_R	0.946685	0.984749	VC2827	VC2827_S2	24H	CTL
Red	12	Average	0.0705098	13252.5	127776	Copy of Image 2_Maximum intensity projection.tif	GRB_R	0.920171	0.813114	VC2827	VC2827_S1	24H	CTL
Blue	1	Average	0.0743982	6943	75604.5	Copy of Image 16_Maximum intensity projection.tif	GRB_B	0.842652	0.800984	VC2827	VC2827_S3	24H	CTL
Blue	3	Average	0.0831412	8168.48	99624.8	Copy of Image 1_Maximum intensity projection.tif	GRB_B	0.991384	1.05546	VC2827	VC2827_S1	24H	CTL
Blue	8	Average	0.0776974	9524.01	111035	Copy of Image 3_Maximum intensity projection.tif	GRB_B	1.1559	1.17635	VC2827	VC2827_S2	24H	CTL
Blue	12	Average	0.0705098	8322.37	91293.8	Copy of Image 2_Maximum intensity projection.tif	GRB_B	1.01006	0.967202	VC2827	VC2827_S1	24H	CTL
Red	15	Average	0.0698953	12817.2	131155	Copy of Image 5_Maximum intensity projection.tif	GRB_R	0.889941	0.834613	VC2827	VC2827_S4	24H	L_05
Red	18	Average	0.0683495	15721.4	160595	Copy of Image 7_Maximum intensity projection.tif	GRB_R	1.09159	1.02196	VC2827	VC2827_S4	24H	L_05
Red	20	Average	0.0810517	14989.3	168946	Copy of Image 8_Maximum intensity projection.tif	GRB_R	1.04076	1.0751	VC2827	VC2827_S5	24H	L_05
Red	22	Average	0.0719787	12989.9	128460	Copy of Image 9_Maximum intensity projection.tif	GRB_R	0.901932	0.817465	VC2827	VC2827_S5	24H	L_05
Blue	15	Average	0.0698953	5512.68	55437.3	Copy of Image 5_Maximum intensity projection.tif	GRB_B	0.669057	0.587324	VC2827	VC2827_S4	24H	L_05
Blue	18	Average	0.0683495	7463.51	70785.2	Copy of Image 7_Maximum intensity projection.tif	GRB_B	0.905825	0.749926	VC2827	VC2827_S4	24H	L_05
Blue	20	Average	0.0810517	7278.63	82502	Copy of Image 8_Maximum intensity projection.tif	GRB_B	0.883386	0.874058	VC2827	VC2827_S5	24H	L_05
Blue	22	Average	0.0719787	7828.95	87258.5	Copy of Image 9_Maximum intensity projection.tif	GRB_B	0.950177	0.92445	VC2827	VC2827_S5	24H	L_05
Red	24	Average	0.0719237	12044	118096	Copy of Image 10_Maximum intensity projection.tif	GRB_R	0.836257	0.751512	VC2827	VC2827_S6	24H	MK_0125
Red	26	Average	0.0612928	11561.4	94780.2	Copy of Image 11_Maximum intensity projection.tif	GRB_R	0.802749	0.603142	VC2827	VC2827_S6	24H	MK_0125
Red	27	Average	0.111946	20983.9	352131	Copy of Image 12_Maximum intensity projection.tif	GRB_R	1.45699	2.24082	VC2827	VC2827_S7	24H	MK_0125
Red	30	Average	0.0856486	18593.6	217453	Copy of Image 14_Maximum intensity projection.tif	GRB_R	1.29102	1.38378	VC2827	VC2827_S8	24H	MK_0125
Blue	24	Average	0.0719237	5570.65	57697.9	Copy of Image 10_Maximum intensity projection.tif	GRB_B	0.676094	0.611274	VC2827	VC2827_S6	24H	MK_0125
Blue	26	Average	0.0612928	4215.84	37831	Copy of Image 11_Maximum intensity projection.tif	GRB_B	0.511665	0.400796	VC2827	VC2827_S6	24H	MK_0125
Blue	27	Average	0.111946	9065.44	173951	Copy of Image 12_Maximum intensity projection.tif	GRB_B	1.10025	1.84291	VC2827	VC2827_S7	24H	MK_0125
Blue	30	Average	0.0856486	13252	165187	Copy of Image 14_Maximum intensity projection.tif	GRB_B	1.60836	1.75006	VC2827	VC2827_S8	24H	MK_0125
Red	58	Average	0.0536002	20052	159219	ctl_10.tif	GRB_R	1.00348	0.951582	VC2829	VC2829_S1	24H	CTL
Red	0	Average	0.0469883	20314.9	134431	ctl_11.tif	GRB_R	1.01664	0.803434	VC2829	VC2829_S1	24H	CTL
Red	3	Average	0.0596448	22852.9	207433	ctl_27.tif	GRB_R	1.14365	1.23974	VC2829	VC2829_S2	24H	CTL
Red	5	Average	0.0568226	21499.2	179444	ctl_28.tif	GRB_R	1.07591	1.07246	VC2829	VC2829_S2	24H	CTL
Red	8	Average	0.0625454	20149.8	187408	ctl_30.tif	GRB_R	1.00838	1.12006	VC2829	VC2829_S2	24H	CTL
Red	9	Average	0.0545721	18801.1	155811	ctl_8.tif	GRB_R	0.940881	0.931218	VC2829	VC2829_S1	24H	CTL
Red	11	Average	0.0609702	16207	147494	ctl_9.tif	GRB_R	0.811064	0.881508	VC2829	VC2829_S1	24H	CTL
Blue	58	Average	0.0536002	5973.9	47828.5	ctl_10.tif	GRB_B	0.85315	0.794708	VC2829	VC2829_S1	24H	CTL
Blue	0	Average	0.0469883	4856.16	31992.6	ctl_11.tif	GRB_B	0.693522	0.531582	VC2829	VC2829_S1	24H	CTL
Blue	3	Average	0.0596448	8707.5	84093.1	ctl_27.tif	GRB_B	1.24354	1.39727	VC2829	VC2829_S2	24H	CTL
Blue	5	Average	0.0568226	6980.2	59615.2	ctl_28.tif	GRB_B	0.996863	0.990553	VC2829	VC2829_S2	24H	CTL
Blue	8	Average	0.0625454	6436.38	63692.2	ctl_30.tif	GRB_B	0.919198	1.0583	VC2829	VC2829_S2	24H	CTL
Blue	9	Average	0.0545721	9958.76	76593.9	ctl_8.tif	GRB_B	1.42224	1.27267	VC2829	VC2829_S1	24H	CTL
Blue	11	Average	0.0609702	6102.28	57470.8	ctl_9.tif	GRB_B	0.871484	0.954922	VC2829	VC2829_S1	24H	CTL
Red	14	Average	0.0426429	14153.9	86516.5	L_13.tif	GRB_R	0.708319	0.517072	VC2829	VC2829_S2	24H	L_05
Red	15	Average	0.044034	18983.6	120181	L_14.tif	GRB_R	0.950016	0.718273	VC2829	VC2829_S2	24H	L_05
Red	16	Average	0.0453157	14426.2	99423.8	L_15.tif	GRB_R	0.721943	0.594213	VC2829	VC2829_S2	24H	L_05
Red	18	Average	0.0510877	21184.4	183522	L_16.tif	GRB_R	1.06015	1.09683	VC2829	VC2829_S2	24H	L_05
Red	19	Average	0.0793581	24405.1	280041	L_22.tif	GRB_R	1.22133	1.67369	VC2829	VC2829_S3	24H	L_05
Red	20	Average	0.0438657	17330.2	107500	L_23.tif	GRB_R	0.867271	0.642484	VC2829	VC2829_S3	24H	L_05
Red	28	Average	0.0514397	18580.2	150143	L_25.tif	GRB_R	0.929829	0.897339	VC2829	VC2829_S3	24H	L_05
Blue	14	Average	0.0426429	5592.04	32769.8	L_13.tif	GRB_B	0.798616	0.544495	VC2829	VC2829_S2	24H	L_05
Blue	15	Average	0.044034	6509.04	40579.3	L_14.tif	GRB_B	0.929575	0.674256	VC2829	VC2829_S2	24H	L_05
Blue	16	Average	0.0453157	7779.38	57155	L_15.tif	GRB_B	1.111	0.949675	VC2829	VC2829_S2	24H	L_05
Blue	18	Average	0.0510877	7657.33	70714.6	L_16.tif	GRB_B	1.09357	1.17498	VC2829	VC2829_S2	24H	L_05
Blue	19	Average	0.0793581	5068.65	61219.8	L_22.tif	GRB_B	0.723869	1.01721	VC2829	VC2829_S3	24H	L_05
Blue	20	Average	0.0438657	6260.75	43078.2	L_23.tif	GRB_B	0.894117	0.715778	VC2829	VC2829_S3	24H	L_05
Blue	28	Average	0.0514397	6723.2	51267	L_25.tif	GRB_B	0.96016	0.851841	VC2829	VC2829_S3	24H	L_05
Red	30	Average	0.0503402	19346.8	132572	M_17.tif	GRB_R	0.968189	0.792327	VC2829	VC2829_S4	24H	MK_0125
Red	33	Average	0.0762128	25222.9	292803	M_18.tif	GRB_R	1.26226	1.74996	VC2829	VC2829_S4	24H	MK_0125
Red	34	Average	0.0613936	14937.9	150447	M_19.tif	GRB_R	0.74755	0.899154	VC2829	VC2829_S4	24H	MK_0125
Red	36	Average	0.0537119	18041.9	147863	M_20.tif	GRB_R	0.90289	0.883712	VC2829	VC2829_S4	24H	MK_0125
Red	37	Average	0.0590136	18713.9	177789	M_21.tif	GRB_R	0.936519	1.06257	VC2829	VC2829_S4	24H	MK_0125
Red	39	Average	0.0495988	20111.3	160734	M_26.tif	GRB_R	1.00645	0.960638	VC2829	VC2829_S5	24H	MK_0125
Red	40	Average	0.0569502	15746.9	142927	M_6.tif	GRB_R	0.788037	0.854213	VC2829	VC2829_S6	24H	MK_0125
Blue	30	Average	0.0503402	6238.11	47024.8	M_17.tif	GRB_B	0.890883	0.781353	VC2829	VC2829_S4	24H	MK_0125
Blue	33	Average	0.0762128	6410.41	72071.3	M_18.tif	GRB_B	0.915489	1.19752	VC2829	VC2829_S4	24H	MK_0125
Blue	34	Average	0.0613936	6655.16	59007.4	M_19.tif	GRB_B	0.950442	0.980454	VC2829	VC2829_S4	24H	MK_0125
Blue	36	Average	0.0537119	5347.41	45888.6	M_20.tif	GRB_B	0.76368	0.762475	VC2829	VC2829_S4	24H	MK_0125
Blue	37	Average	0.0590136	6154.46	53857.7	M_21.tif	GRB_B	0.878937	0.894887	VC2829	VC2829_S4	24H	MK_0125
Blue	39	Average	0.0495988	6552.56	50577.2	M_26.tif	GRB_B	0.93579	0.840381	VC2829	VC2829_S5	24H	MK_0125
Blue	40	Average	0.0569502	6333.7	50492.2	M_6.tif	GRB_B	0.904535	0.838968	VC2829	VC2829_S6	24H	MK_0125
Red	17	Average	0.0459696	18976.4	127787	ctl_11.tif	GRB_R	1.16887	1.17385	VC2832	VC2832_S1	24H	CTL
Red	19	Average	0.0516795	16349.3	122116	ctl_12.tif	GRB_R	1.00705	1.12176	VC2832	VC2832_S1	24H	CTL
Red	21	Average	0.0484671	15790.1	106373	ctl_2.tif	GRB_R	0.972598	0.977143	VC2832	VC2832_S2	24H	CTL
Red	22	Average	0.049426	19719.8	155390	ctl_3.tif	GRB_R	1.21465	1.42742	VC2832	VC2832_S2	24H	CTL
Red	24	Average	0.0424691	14571.4	84348	ctl_4.tif	GRB_R	0.897534	0.774821	VC2832	VC2832_S2	24H	CTL
Red	31	Average	0.0415339	15180.1	85657.9	ctl_8.tif	GRB_R	0.935029	0.786855	VC2832	VC2832_S3	24H	CTL
Red	32	Average	0.0450018	13057.3	80355.9	ctl_9.tif	GRB_R	0.804272	0.73815	VC2832	VC2832_S3	24H	CTL
Blue	17	Average	0.0459696	6916.28	45958.1	ctl_11.tif	GRB_B	0.714823	0.690253	VC2832	VC2832_S1	24H	CTL
Blue	19	Average	0.0516795	11611.3	91617	ctl_12.tif	GRB_B	1.20007	1.37601	VC2832	VC2832_S1	24H	CTL
Blue	21	Average	0.0484671	9242.62	65105.3	ctl_2.tif	GRB_B	0.955259	0.977829	VC2832	VC2832_S2	24H	CTL
Blue	22	Average	0.049426	10609.6	77755.8	ctl_3.tif	GRB_B	1.09655	1.16783	VC2832	VC2832_S2	24H	CTL
Blue	24	Average	0.0424691	9020.35	56794.3	ctl_4.tif	GRB_B	0.932286	0.853005	VC2832	VC2832_S2	24H	CTL
Blue	31	Average	0.0415339	11119.7	66721.2	ctl_8.tif	GRB_B	1.14927	1.0021	VC2832	VC2832_S3	24H	CTL
Blue	32	Average	0.0450018	9208.61	62118.4	ctl_9.tif	GRB_B	0.951744	0.932969	VC2832	VC2832_S3	24H	CTL
Red	9	Average	0.0719787	17236.1	174468	L_13.tif	GRB_R	1.06167	1.60266	VC2832	VC2832_S6	24H	L_05
Red	11	Average	0.0580669	16808.3	147301	L_14.tif	GRB_R	1.03532	1.35311	VC2832	VC2832_S6	24H	L_05
Red	13	Average	0.0443566	14130.1	83284.8	L_15.tif	GRB_R	0.870351	0.765055	VC2832	VC2832_S7	24H	L_05
Red	14	Average	0.0551635	17609.7	139944	L_16.tif	GRB_R	1.08468	1.28553	VC2832	VC2832_S7	24H	L_05
Red	15	Average	0.044155	18024.7	113744	L_17.tif	GRB_R	1.11024	1.04486	VC2832	VC2832_S7	24H	L_05
Blue	9	Average	0.0719787	9202.39	98917.5	L_13.tif	GRB_B	0.951101	1.48566	VC2832	VC2832_S6	24H	L_05
Blue	11	Average	0.0580669	8065.17	77057.8	L_14.tif	GRB_B	0.833565	1.15735	VC2832	VC2832_S6	24H	L_05
Blue	13	Average	0.0443566	6517.45	41551.2	L_15.tif	GRB_B	0.673603	0.624066	VC2832	VC2832_S7	24H	L_05
Blue	14	Average	0.0551635	8148.43	59819.9	L_16.tif	GRB_B	0.842171	0.898447	VC2832	VC2832_S7	24H	L_05
Blue	15	Average	0.044155	6771.55	46501.3	L_17.tif	GRB_B	0.699865	0.698413	VC2832	VC2832_S7	24H	L_05
Red	34	Average	0.0483341	16377.7	117837	m_18.tif	GRB_R	1.00879	1.08245	VC2832	VC2832_S4	24H	MK_0125
Red	1	Average	0.0449111	13500.1	84191	m_20.tif	GRB_R	0.831546	0.77338	VC2832	VC2832_S4	24H	MK_0125
Red	4	Average	0.066272	19173.6	217137	m_21.tif	GRB_R	1.18101	1.99462	VC2832	VC2832_S5	24H	MK_0125
Red	6	Average	0.0559321	17016.6	143751	m_22.tif	GRB_R	1.04815	1.3205	VC2832	VC2832_S5	24H	MK_0125
Red	7	Average	0.0510427	17331.3	129775	m_23.tif	GRB_R	1.06753	1.19211	VC2832	VC2832_S5	24H	MK_0125
Blue	34	Average	0.0483341	9902.26	74223.3	m_18.tif	GRB_B	1.02344	1.11477	VC2832	VC2832_S4	24H	MK_0125
Blue	1	Average	0.0449111	8839.58	56683.5	m_20.tif	GRB_B	0.913604	0.851341	VC2832	VC2832_S4	24H	MK_0125
Blue	4	Average	0.066272	11158.9	150405	m_21.tif	GRB_B	1.15332	2.25897	VC2832	VC2832_S5	24H	MK_0125
Blue	6	Average	0.0559321	11444.4	94106.4	m_22.tif	GRB_B	1.18282	1.4134	VC2832	VC2832_S5	24H	MK_0125
Blue	7	Average	0.0510427	9967.19	76734.3	m_23.tif	GRB_B	1.03015	1.15249	VC2832	VC2832_S5	24H	MK_0125
Red	20	Average	0.0523207	13041.2	102671	ctl_7.tif	GRB_R	1.01185	0.896164	VC2832	VC2832_6H_S1	6H	CTL
Red	23	Average	0.0604863	13495.7	124082	ctl_8.tif	GRB_R	1.04711	1.08305	VC2832	VC2832_6H_S2	6H	CTL
Red	25	Average	0.063218	12128.5	116948	ctl_9.tif	GRB_R	0.941035	1.02078	VC2832	VC2832_6H_S2	6H	CTL
Blue	20	Average	0.0523207	8444.1	64148.7	ctl_7.tif	GRB_B	0.891979	0.732969	VC2832	VC2832_6H_S1	6H	CTL
Blue	23	Average	0.0604863	10843.8	107852	ctl_8.tif	GRB_B	1.14547	1.23232	VC2832	VC2832_6H_S2	6H	CTL
Blue	25	Average	0.063218	9112.21	90556.5	ctl_9.tif	GRB_B	0.962554	1.03471	VC2832	VC2832_6H_S2	6H	CTL
Red	33	Average	0.0406908	11242.6	67303.9	L_4.tif	GRB_R	0.872299	0.587462	VC2832	VC2832_6H_S5	6H	L_2
Red	35	Average	0.0600464	13546.9	119716	L_5.tif	GRB_R	1.05108	1.04494	VC2832	VC2832_6H_S5	6H	L_2
Red	43	Average	0.0500308	12135.4	88380.2	L_6_redoreg.tif	GRB_R	0.941569	0.771426	VC2832	VC2832_6H_S5	6H	L_2
Blue	33	Average	0.0406908	10618.1	64634.7	L_4.tif	GRB_B	1.12163	0.738523	VC2832	VC2832_6H_S5	6H	L_2
Blue	35	Average	0.0600464	9909.25	81722.2	L_5.tif	GRB_B	1.04675	0.933766	VC2832	VC2832_6H_S5	6H	L_2
Blue	43	Average	0.0500308	8845.38	72817.4	L_6_redoreg.tif	GRB_B	0.934368	0.832019	VC2832	VC2832_6H_S5	6H	L_2
Red	28	Average	0.0576399	11915.7	99670.5	m_11.tif	GRB_R	0.92452	0.869973	VC2832	VC2832_6H_S3	6H	MK_1
Red	30	Average	0.0388322	11131.1	77372.1	m_12.tif	GRB_R	0.863649	0.675342	VC2832	VC2832_6H_S4	6H	MK_1
Red	31	Average	0.0444211	11760.7	73712.9	m_13.tif	GRB_R	0.912494	0.643402	VC2832	VC2832_6H_S4	6H	MK_1
Red	41	Average	0.0494888	11621.5	87224.4	m_10_redoreg.tif	GRB_R	0.901698	0.761337	VC2832	VC2832_6H_S3	6H	MK_1
Blue	28	Average	0.0576399	9171.84	78552.4	m_11.tif	GRB_B	0.968853	0.897547	VC2832	VC2832_6H_S3	6H	MK_1
Blue	30	Average	0.0388322	6544.04	37455.9	m_12.tif	GRB_B	0.691269	0.427975	VC2832	VC2832_6H_S4	6H	MK_1
Blue	31	Average	0.0444211	8945.02	53288.3	m_13.tif	GRB_B	0.944894	0.608877	VC2832	VC2832_6H_S4	6H	MK_1
Blue	41	Average	0.0494888	13204.9	98067.9	m_10_redoreg.tif	GRB_B	1.39488	1.12053	VC2832	VC2832_6H_S3	6H	MK_1
Red	0	Average	0.0468494	18375.9	126797	ctl_1.tif	GRB_R	0.891775	0.819906	VC2835	VC2835_S1	6H	CTL
Red	4	Average	0.053228	25729.4	194936	ctl_24.tif	GRB_R	1.24864	1.26051	VC2835	VC2835_S3	6H	CTL
Red	5	Average	0.0476978	27356.8	168079	ctl_25.tif	GRB_R	1.32761	1.08684	VC2835	VC2835_S3	6H	CTL
Red	7	Average	0.0614541	22800.6	209962	ctl_2.tif	GRB_R	1.1065	1.35767	VC2835	VC2835_S1	6H	CTL
Red	9	Average	0.050002	16435.8	129762	ctl_4.tif	GRB_R	0.797622	0.839075	VC2835	VC2835_S1	6H	CTL
Red	11	Average	0.0446389	19250.5	116168	ctl_5.tif	GRB_R	0.934216	0.751172	VC2835	VC2835_S2	6H	CTL
Red	14	Average	0.0453647	14862.9	96788.1	ctl_6.tif	GRB_R	0.721292	0.625858	VC2835	VC2835_S2	6H	CTL
Red	16	Average	0.0643355	20036.2	194698	ctl_7.tif	GRB_R	0.972346	1.25897	VC2835	VC2835_S2	6H	CTL
Blue	0	Average	0.0468494	10375.6	62958.4	ctl_1.tif	GRB_B	1.12646	0.940856	VC2835	VC2835_S1	6H	CTL
Blue	4	Average	0.053228	7640.96	61994.2	ctl_24.tif	GRB_B	0.829563	0.926448	VC2835	VC2835_S3	6H	CTL
Blue	5	Average	0.0476978	8541.68	47145.6	ctl_25.tif	GRB_B	0.927353	0.704548	VC2835	VC2835_S3	6H	CTL
Blue	7	Average	0.0614541	7043.82	70570.1	ctl_2.tif	GRB_B	0.764733	1.05461	VC2835	VC2835_S1	6H	CTL
Blue	9	Average	0.050002	11443	79788.4	ctl_4.tif	GRB_B	1.24234	1.19237	VC2835	VC2835_S1	6H	CTL
Blue	11	Average	0.0446389	9564.49	61808.5	ctl_5.tif	GRB_B	1.0384	0.923672	VC2835	VC2835_S2	6H	CTL
Blue	14	Average	0.0453647	9601.87	66712.3	ctl_6.tif	GRB_B	1.04246	0.996955	VC2835	VC2835_S2	6H	CTL
Blue	16	Average	0.0643355	9475.11	84351	ctl_7.tif	GRB_B	1.02869	1.26055	VC2835	VC2835_S2	6H	CTL
Red	22	Average	0.0638736	20191.8	191126	L_12.tif	GRB_R	0.979899	1.23587	VC2835	VC2835_S4	6H	L_2
Red	24	Average	0.051615	23341.7	175238	L_13.tif	GRB_R	1.13276	1.13314	VC2835	VC2835_S5	6H	L_2
Red	34	Average	0.0580669	19366.2	163194	L_16.tif	GRB_R	0.939834	1.05525	VC2835	VC2835_S5	6H	L_2
Red	41	Average	0.0516883	21654.6	161847	L_9.tif	GRB_R	1.05089	1.04655	VC2835	VC2835_S4	6H	L_2
Blue	22	Average	0.0638736	8955.64	77713.6	L_12.tif	GRB_B	0.972295	1.16136	VC2835	VC2835_S4	6H	L_2
Blue	24	Average	0.051615	9334.04	68053.4	L_13.tif	GRB_B	1.01338	1.017	VC2835	VC2835_S5	6H	L_2
Blue	34	Average	0.0580669	9951.84	86941.4	L_16.tif	GRB_B	1.08045	1.29926	VC2835	VC2835_S5	6H	L_2
Blue	41	Average	0.0516883	10676	87343.1	L_9.tif	GRB_B	1.15907	1.30526	VC2835	VC2835_S4	6H	L_2
Red	48	Average	0.0661791	22267.1	206963	M_18.tif	GRB_R	1.08061	1.33828	VC2835	VC2835_S5	6H	MK_1
Red	50	Average	0.0592766	22490.1	205827	M_19.tif	GRB_R	1.09144	1.33093	VC2835	VC2835_S5	6H	MK_1
Red	1	Average	0.0607888	19752.3	171665	M_23.tif	GRB_R	0.958571	1.11003	VC2835	VC2835_S6	6H	MK_1
Blue	48	Average	0.0661791	10753.8	112934	M_18.tif	GRB_B	1.16752	1.6877	VC2835	VC2835_S5	6H	MK_1
Blue	50	Average	0.0592766	10072.6	84346.5	M_19.tif	GRB_B	1.09356	1.26048	VC2835	VC2835_S5	6H	MK_1
Blue	1	Average	0.0607888	7115.82	59014.4	M_23.tif	GRB_B	0.77255	0.881916	VC2835	VC2835_S6	6H	MK_1

## Sheet: Figure_6C
Count	Image	Treatment	Order_Analysed	Distance	Density	Dissociation	SLIDE	Time	Label
14	Copy of Image 13_Maximum intensity projection.tif	CTL	2	138.075	0.101394	VC2769	VC2769_S1	24H	CTL
17	Copy of Image 21_maybenosstr3_Maximum intensity projection.tif	CTL	5	201.031	0.0845643	VC2769	VC2769_S2	24H	CTL
23	Copy of Image 26_Maximum intensity projection.tif	CTL	9	166.977	0.137743	VC2769	VC2769_S3	24H	CTL
27	Copy of Image 10_Maximum intensity projection.tif	MK_BLACK	11	354.314	0.0762037	VC2769	VC2769_S5	24H	MK_0125
10	Copy of Image 20_Maximum intensity projection.tif	MK_BLACK	14	90.666	0.110295	VC2769	VC2769_S6	24H	MK_0125
25	Copy of Image 6_Maximum intensity projection.tif	MK_BLACK	16	179.27	0.139454	VC2769	VC2769_S4	24H	MK_0125
65	Copy of ctl1.tif	CTL	1	152.63	0.425868	VC2778	VC2778_S1	24H	CTL
31	Copy of CTL2.tif	CTL	2	210.65	0.147163	VC2778	VC2778_S1	24H	CTL
90	Copy of CTL3.tif	CTL	3	284.483	0.316364	VC2778	VC2778_S2	24H	CTL
66	Copy of ctl4.tif	CTL	4	314.071	0.210144	VC2778	VC2778_S2	24H	CTL
110	Copy of CTL6.tif	CTL	6	432.956	0.254067	VC2778	VC2778_S2	24H	CTL
61	Copy of MK1.tif	MK5256	12	125.269	0.486954	VC2778	VC2778_S3	24H	MK_05
72	Copy of MK2.tif	MK5256	13	186.34	0.386391	VC2778	VC2778_S3	24H	MK_05
76	Copy of mk3.tif	MK5256	14	401.014	0.18952	VC2778	VC2778_S4	24H	MK_05
46	Copy of mk4.tif	MK5256	15	231.921	0.198344	VC2778	VC2778_S4	24H	MK_05
13	Copy of MK5.tif	MK5256	16	72.1791	0.180107	VC2778	VC2778_S5	24H	MK_05
15	Image_12.tif	CTL	2	78.9258	0.190052	VC2780	VC2780_S5	24H	CTL
34	Image_13.tif	CTL	3	247.878	0.137164	VC2780	VC2780_S5	24H	CTL
38	Image_29_2.tif	CTL	21	203.14	0.187063	VC2780	VC2780_S1	24H	CTL
35	Image_30_2.tif	CTL	23	156.467	0.22369	VC2780	VC2780_S1	24H	CTL
28	Image_32.tif	CTL	25	108.008	0.259241	VC2780	VC2780_S1	24H	CTL
14	Image_34.tif	CTL	27	124.384	0.112555	VC2780	VC2780_S1	24H	CTL
15	Image_39_2.tif	CTL	32	90.2588	0.166189	VC2780	VC2780_S2	24H	CTL
16	Image_42_2.tif	CTL	35	77.3047	0.206973	VC2780	VC2780_S2	24H	CTL
21	Image_43_2.tif	CTL	37	108.031	0.194389	VC2780	VC2780_S2	24H	CTL
23	Image_4.tif	CTL	41	168.949	0.136136	VC2780	VC2780_S3	24H	CTL
34	Image_13_MK.tif	MK	4	120.54	0.282063	VC2780	VC2780_S3	24H	MK_1
27	Image_15.tif	MK	6	75.9707	0.3554	VC2780	VC2780_S7	24H	MK_1
50	Image_17.tif	MK	7	379.386	0.131792	VC2780	VC2780_S7	24H	MK_1
22	Image_22.tif	MK	13	279.909	0.0785971	VC2780	VC2780_S7	24H	MK_1
23	Image_28.tif	MK	19	111.803	0.205719	VC2780	VC2780_S8	24H	MK_1
23	Image_30.tif	MK	22	118.384	0.194283	VC2780	VC2780_S8	24H	MK_1
26	Image_33.tif	MK	26	97.363	0.267042	VC2780	VC2780_S8	24H	MK_1
52	Image_35.tif	MK	28	203.708	0.255267	VC2780	VC2780_S8	24H	MK_1
31	Image_47.tif	MK	39	70.8222	0.437716	VC2780	VC2780_S4	24H	MK_1
24	Image_49.tif	MK	40	98.5239	0.243596	VC2780	VC2780_S4	24H	MK_1
58	Image_7_2.tif	MK	46	375.93	0.154284	VC2780	VC2780_S3	24H	MK_1
36	Image_9_2.tif	MK	48	149.37	0.241012	VC2780	VC2780_S3	24H	MK_1
16	Copy of Image 12_Maximum intensity projection.tif	CTL	1	101.702	0.157323	VC2786	VC2786_6H_S1	6H	CTL
12	Copy of Image 13_Maximum intensity projection.tif	CTL	2	179.497	0.0668536	VC2786	VC2786_6H_S1	6H	CTL
15	Copy of Image 28_Maximum intensity projection.tif	CTL	4	273.131	0.0549187	VC2786	VC2786_6H_S2	6H	CTL
7	Copy of Image 30_Maximum intensity projection.tif	CTL	5	63.3078	0.110571	VC2786	VC2786_6H_S2	6H	CTL
22	Copy of Image 31_Maximum intensity projection.tif	CTL	6	130.697	0.168328	VC2786	VC2786_6H_S2	6H	CTL
16	Copy of Image 32_Maximum intensity projection.tif	CTL	7	97.5115	0.164083	VC2786	VC2786_6H_S2	6H	CTL
15	Copy of Image 7_Maximum intensity projection.tif	CTL	8	194.564	0.0770954	VC2786	VC2786_6H_S1	6H	CTL
23	Copy of Image 9_Maximum intensity projection.tif	CTL	9	178.493	0.128856	VC2786	VC2786_6H_S1	6H	CTL
16	Copy of Image29_Maximum intensity projection.tif	CTL	10	191.923	0.0833668	VC2786	VC2786_6H_S2	6H	CTL
31	Copy of Image 15_Maximum intensity projection.tif	MK4256	11	348.668	0.0889098	VC2786	VC2786_6H_S3	6H	MK_1
17	Copy of Image 17_Maximum intensity projection.tif	MK4256	12	106.254	0.159994	VC2786	VC2786_6H_S3	6H	MK_1
45	Copy of Image 19_Maximum intensity projection.tif	MK4256	13	317.253	0.141843	VC2786	VC2786_6H_S3	6H	MK_1
25	Copy of Image 21_Maximum intensity projection.tif	MK4256	14	175.549	0.14241	VC2786	VC2786_6H_S3	6H	MK_1
16	Copy of Image 24_Maximum intensity projection.tif	MK4256	15	134.575	0.118893	VC2786	VC2786_6H_S3	6H	MK_1
22	Copy of Image 34_Maximum intensity projection.tif	MK4256	16	148.956	0.147695	VC2786	VC2786_6H_S4	6H	MK_1
36	Copy of Image 3_Maximum intensity projection.tif	MK4256	17	173.756	0.207187	VC2786	VC2786_6H_S5	6H	MK_1
24	Copy of Image 4_DISTALMaximum intensity projection.tif	MK4256	18	127.184	0.188703	VC2786	VC2786_6H_S5	6H	MK_1
34	Copy of Image 6_Maximum intensity projection.tif	MK4256	19	227.377	0.149531	VC2786	VC2786_6H_S5	6H	MK_1
8	Copy of Image33_Maximum intensity projection.tif	MK4256	20	40.4066	0.197987	VC2786	VC2786_6H_S4	6H	MK_1
66	Copy of Image 17_Maximum intensity projection.tif	CTL	1	290.946	0.226846	VC2786	VC2786_S1	24H	CTL
45	Copy of Image 19_Maximum intensity projection.tif	CTL	2	235.559	0.191035	VC2786	VC2786_S2	24H	CTL
16	Copy of Image 14_Maximum intensity projection.tif	CTL	3	105.645	0.151451	VC2786	VC2786_S1	24H	CTL
23	Copy of Image 15_Maximum intensity projection.tif	CTL	4	133.78	0.171924	VC2786	VC2786_S1	24H	CTL
48	Copy of Image 17_again_Maximum intensity projection.ome.tif	CTL	5	286.74	0.167399	VC2786	VC2786_S2	24H	CTL
10	Copy of Image 36_Maximum intensity projection.tif	CTL	6	123.728	0.0808222	VC2786	VC2786_S4	24H	CTL
22	Copy of Image 41_Maximum intensity projection.tif	CTL	9	238.704	0.0921644	VC2786	VC2786_S4	24H	CTL
12	Copy of Image 1_Maximum intensity projection.tif	CTL	12	156.047	0.0769	VC2786	VC2786_S3	24H	CTL
32	Copy of Image 3 oppositeside_Maximum intensity projection.tif	CTL	13	209.755	0.152559	VC2786	VC2786_S3	24H	CTL
33	Copy of Image 10_Maximum intensity projection.tif	MK	15	176.261	0.187222	VC2786	VC2786_S5	24H	MK_1
18	Copy of Image 12_and13Maximum intensity projection.tif	MK	16	85.6856	0.21007	VC2786	VC2786_S5	24H	MK_1
31	Copy of Image 15_MKMaximum intensity projection.tif	MK	19	185.23	0.16736	VC2786	VC2786_S5	24H	MK_1
36	Copy of Image 9_Maximum intensity projection.tif	MK	20	173.073	0.208004	VC2786	VC2786_S5	24H	MK_1
41	Copy of Image 18_Maximum intensity projection.tif	MK	21	244.396	0.16776	VC2786	VC2786_S8	24H	MK_1
43	Copy of Image 22_Maximum intensity projection.tif	MK	23	260.809	0.164872	VC2786	VC2786_S8	24H	MK_1
11	Copy of Image 23flatcell_Maximum intensity projection.tif	MK	24	77.7368	0.141503	VC2786	VC2786_S8	24H	MK_1
26	Copy of Image 29_Maximum intensity projection.tif	MK	26	150.807	0.172406	VC2786	VC2786_S6	24H	MK_1
13	Copy of Image 31_Maximum intensity projection.tif	MK	27	96.7805	0.134325	VC2786	VC2786_S6	24H	MK_1
31	Copy of Image 33_Maximum intensity projection.tif	MK	28	287.151	0.107957	VC2786	VC2786_S6	24H	MK_1
23	Copy of Image 34_Maximum intensity projection.tif	MK	29	117.192	0.196259	VC2786	VC2786_S6	24H	MK_1
12	Copy of Image 35_Maximum intensity projection.tif	MK	30	108.655	0.110441	VC2786	VC2786_S6	24H	MK_1
16	Copy of Image 43_Maximum intensity projection.tif	MK	31	68.4605	0.233711	VC2786	VC2786_S7	24H	MK_1
26	Copy of Image 45_Maximum intensity projection.tif	MK	32	175.907	0.147805	VC2786	VC2786_S7	24H	MK_1
28	Copy of Image 15_Maximum intensity projection.tif	CTL	1	148.904	0.18804	VC2788	VC2788_S1	24H	CTL
28	Copy of Image 20_Maximum intensity projection.tif	CTL	2	129.157	0.216791	VC2788	VC2788_S2	24H	CTL
25	Copy of Image 21_Maximum intensity projection.tif	CTL	3	191.655	0.130443	VC2788	VC2788_S2	24H	CTL
23	Copy of Image 13_Maximum intensity projection.tif	L7	4	108.021	0.212921	VC2788	VC2788_S3	24H	L_1
22	Copy of Image 16_Maximum intensity projection.tif	L7	6	194.492	0.113115	VC2788	VC2788_S4	24H	L_1
9	Copy of Image 17_Maximum intensity projection.tif	L7	7	67.8313	0.132682	VC2788	VC2788_S4	24H	L_1
5	Copy of Image 22_Maximum intensity projection.tif	L7	8	39.1137	0.127832	VC2788	VC2788_S5	24H	L_1
11	Copy of Image 18_Maximum intensity projection.tif	MK4256	9	50.0808	0.219645	VC2788	VC2788_S6	24H	MK_1
17	Copy of Image 19_Maximum intensity projection.tif	MK4256	10	65.3863	0.259993	VC2788	VC2788_S7	24H	MK_1
34	Copy of Image 11_Maximum intensity projection.tif	CTL	1	171.13	0.198679	VC2792	VC2792_S1	24H	CTL
21	Copy of Image 6_Maximum intensity projection.tif	CTL	2	124.309	0.168934	VC2792	VC2792_S1	24H	CTL
7	Copy of Image 8_Maximum intensity projection.tif	CTL	3	73.7775	0.0948798	VC2792	VC2792_S1	24H	CTL
23	Copy of Image 9_Maximum intensity projection.tif	CTL	4	180.268	0.127588	VC2792	VC2792_S1	24H	CTL
18	Copy of Image 33_Maximum intensity projection.tif	CTL	6	135.019	0.133315	VC2792	VC2792_S2	24H	CTL
25	Copy of Image 34_Maximum intensity projection.tif	CTL	7	109.834	0.227616	VC2792	VC2792_S2	24H	CTL
10	Copy of Image 40_Maximum intensity projection.tif	CTL	8	76.901	0.130037	VC2792	VC2792_S2	24H	CTL
13	Copy of Image 39_Maximum intensity projection.tif	L_2	10	193.982	0.0670166	VC2792	VC2792_S6	24H	L_2
5	Copy of Image 22_Maximum intensity projection.tif	L_2	11	77.8625	0.0642157	VC2792	VC2792_S7	24H	L_2
30	Copy of Image 1_Maximum intensity projection.tif	MK_1	15	243.684	0.12311	VC2792	VC2792_S8	24H	MK_1
16	Copy of Image 3_Maximum intensity projection.tif	MK_1	16	166.14	0.0963044	VC2792	VC2792_S8	24H	MK_1
17	Copy of Image 5_Maximum intensity projection.tif	MK_1	17	108.567	0.156585	VC2792	VC2792_S8	24H	MK_1
23	Copy of Image 27_Maximum intensity projection.tif	MK_1	18	71.7772	0.320436	VC2792	VC2792_S9	24H	MK_1
7	Copy of Image 28_Maximum intensity projection.tif	MK_1	19	50.1785	0.139502	VC2792	VC2792_S9	24H	MK_1
56	Copy of Image 29_Maximum intensity projection.tif	MK_1	20	180.003	0.311107	VC2792	VC2792_S9	24H	MK_1
14	Copy of Image 12_Maximum intensity projection.tif	L_1	23	69.4175	0.201678	VC2792	VC2792_S3	24H	L_1
23	Copy of Image 14_Maximum intensity projection.tif	L_1	24	200.575	0.11467	VC2792	VC2792_S3	24H	L_1
21	Copy of Image 15_Maximum intensity projection.tif	L_1	25	127.125	0.165192	VC2792	VC2792_S3	24H	L_1
8	Copy of Image 35_Maximum intensity projection.tif	L_1	26	98.1345	0.0815208	VC2792	VC2792_S4	24H	L_1
16	Copy of Image 37_Maximum intensity projection.tif	L_1	28	81.3039	0.196793	VC2792	VC2792_S4	24H	L_1
36	Copy of Image 38_Maximum intensity projection.tif	L_1	29	201.307	0.178831	VC2792	VC2792_S4	24H	L_1
32	Copy of Image 18_Maximum intensity projection.tif	L_1	31	236.645	0.135224	VC2792	VC2792_S5	24H	L_1
13	Copy of Image 20_Maximum intensity projection.tif	L_1	33	111.411	0.116685	VC2792	VC2792_S5	24H	L_1
20	Copy of Image 35_Maximum intensity projection.tif	CTL	3	235.647	0.0848727	VC2794	VC2794_S1	24H	CTL
23	Copy of Image 37_Maximum intensity projection.tif	CTL	4	330.34	0.0696252	VC2794	VC2794_S1	24H	CTL
30	Copy of Image 40_Maximum intensity projection.tif	CTL	5	172.936	0.173474	VC2794	VC2794_S1	24H	CTL
20	Copy of Image 51_Maximum intensity projection.tif	CTL	6	287.253	0.0696251	VC2794	VC2794_S2	24H	CTL
30	Copy of Image 53_Maximum intensity projection.tif	CTL	7	441.535	0.0679448	VC2794	VC2794_S2	24H	CTL
15	CTL 10.tif	CTL	19	151.537	0.0989858	VC2794	VC2794_S7	24H	CTL
38	CTL8.tif	CTL	20	286.995	0.132407	VC2794	VC2794_S7	24H	CTL
7	05L_17.tif	L705	21	160.094	0.0437242	VC2794	VC2794_S8	24H	L_05
8	05L_18.tif	L705	22	83.1283	0.0962368	VC2794	VC2794_S8	24H	L_05
11	05L_1.tif	L705	23	91.9366	0.119648	VC2794	VC2794_S9	24H	L_05
35	05L_5.tif	L705	27	170.583	0.205178	VC2794	VC2794_S9	24H	L_05
35	Copy of Image 42_Maximum intensity projection.tif	L71	14	428.6	0.0816612	VC2794	VC2794_S5	24H	L_1
42	Copy of Image 44_Maximum intensity projection.tif	L71	15	243.436	0.17253	VC2794	VC2794_S5	24H	L_1
23	Copy of Image 46_Maximum intensity projection.tif	L71	16	167.656	0.137186	VC2794	VC2794_S5	24H	L_1
13	Copy of Image 47_Maximum intensity projection.tif	L71	17	275.621	0.0471662	VC2794	VC2794_S6	24H	L_1
30	Copy of Image 49_Maximum intensity projection.tif	L71	18	507.288	0.059138	VC2794	VC2794_S6	24H	L_1
35	2L_14.tif	L72	30	303.582	0.11529	VC2794	VC2794_S11	24H	L_2
11	2L_15.tif	L72	31	126.904	0.08668	VC2794	VC2794_S11	24H	L_2
7	05L_55.tif	MK05	29	192.414	0.0363798	VC2794	VC2794_S10	24H	MK_05
20	05MK_25.tif	MK05	32	124.376	0.160803	VC2794	VC2794_S12	24H	MK_05
40	05MK_27.tif	MK05	33	124.269	0.321883	VC2794	VC2794_S12	24H	MK_05
8	Copy of Image 21_ HIGH VGLUT lowered afte Maximum intensity projection.tif	MK2	8	131.722	0.0607342	VC2794	VC2794_S3	24H	MK_2
17	Copy of Image 23_Maximum intensity projection.tif	MK2	9	119.7	0.142022	VC2794	VC2794_S3	24H	MK_2
29	Copy of Image 26.tif	MK2	10	553.415	0.0524019	VC2794	VC2794_S3	24H	MK_2
47	Copy of Image 28_Maximum intensity projection.tif	MK2	11	313.507	0.149917	VC2794	VC2794_S4	24H	MK_2
29	Copy of Image 30_Maximum intensity projection.tif	MK2	12	262.717	0.110385	VC2794	VC2794_S4	24H	MK_2
15	2MK_22.tif	MK2	34	136.003	0.110292	VC2794	VC2794_S13	24H	MK_2
8	2MK_24.tif	MK2	35	90.0026	0.0888864	VC2794	VC2794_S13	24H	MK_2
19	ctl_27.tif	CTL	1	68.2927	0.278214	VC2798	VC2798_6H_S1	6H	CTL
15	ctl_28.tif	CTL	2	89.0548	0.168436	VC2798	VC2798_6H_S1	6H	CTL
40	ctl_29.tif	CTL	3	146.494	0.273048	VC2798	VC2798_6H_S1	6H	CTL
21	L_30.tif	L7	4	128.044	0.164006	VC2798	VC2798_6H_S2	6H	L_2
20	L_31.tif	L7	5	48.2723	0.414316	VC2798	VC2798_6H_S2	6H	L_2
15	L_32.tif	L7	6	65.8625	0.227747	VC2798	VC2798_6H_S2	6H	L_2
26	1L 11.tif	L71uM	12	179.782	0.14462	VC2798	VC2798_S5	24H	L_1
22	1L 30.tif	L71uM	13	83.0132	0.265018	VC2798	VC2798_S6	24H	L_1
28	1L 31.tif	L71uM	14	138.301	0.202456	VC2798	VC2798_S6	24H	L_1
8	1L 9.tif	L71uM	15	119.732	0.066816	VC2798	VC2798_S5	24H	L_1
6	2L 26.tif	L72uM	18	182.829	0.0328175	VC2798	VC2798_S8	24H	L_2
20	2L 13.tif	L72uM	16	127.602	0.156738	VC2798	VC2798_S7	24H	L_2
5	2L 15.tif	L72uM	17	113.946	0.0438804	VC2798	VC2798_S7	24H	L_2
15	2L 27.tif	L72uM	19	163.976	0.0914769	VC2798	VC2798_S8	24H	L_2
11	2L 29.tif	L72uM	21	64.4774	0.170602	VC2798	VC2798_S8	24H	L_2
64	CTL19.tif	CTL	2	191.648	0.333946	VC2798	VC2798_S1	24H	CTL
20	CTL20.tif	CTL	3	85.4134	0.234155	VC2798	VC2798_S1	24H	CTL
24	CTL22.tif	CTL	5	185.735	0.129216	VC2798	VC2798_S1	24H	CTL
9	CTL23.tif	CTL	6	67.3398	0.13365	VC2798	VC2798_S2	24H	CTL
20	CTL24.tif	CTL	7	185.24	0.107968	VC2798	VC2798_S2	24H	CTL
11	CTL25.tif	CTL	8	51.6683	0.212896	VC2798	VC2798_S2	24H	CTL
35	MK 4.tif	MK2uM	9	115.77	0.302324	VC2798	VC2798_S3	24H	MK_2
15	MK 6.tif	MK2uM	10	92.5664	0.162046	VC2798	VC2798_S3	24H	MK_2
13	MK 8.tif	MK2uM	11	100.777	0.128998	VC2798	VC2798_S4	24H	MK_2
25	ctl 18.tif	CTL	1	82.3422	0.303611	VC2808	VC2808_S1	18H	CTL
27	ctl 1.tif	CTL	2	169.895	0.158921	VC2808	VC2808_S2	18H	CTL
45	ctl 20.tif	CTL	3	251.372	0.179018	VC2808	VC2808_S1	18H	CTL
38	ctl 32.tif	CTL	4	199.394	0.190577	VC2808	VC2808_S3	18H	CTL
40	ctl 34.tif	CTL	5	306.641	0.130446	VC2808	VC2808_S3	18H	CTL
29	ctl 36.tif	CTL	6	199.924	0.145055	VC2808	VC2808_S3	18H	CTL
23	ctl 38.tif	CTL	7	103.304	0.222643	VC2808	VC2808_S4	18H	CTL
14	ctl 40.tif	CTL	8	77.9765	0.179541	VC2808	VC2808_S4	18H	CTL
14	ctl 41.tif	CTL	9	105.211	0.133066	VC2808	VC2808_S4	18H	CTL
20	ctl 5.tif	CTL	10	217.554	0.091931	VC2808	VC2808_S5	18H	CTL
31	ctl 7.tif	CTL	11	143.124	0.216596	VC2808	VC2808_S5	18H	CTL
35	05 l7 22.tif	L7 05	12	159.259	0.219767	VC2808	VC2808_S6	18H	L_05
15	05 l7 24.tif	L7 05	13	148.83	0.100786	VC2808	VC2808_S6	18H	L_05
12	05 l7 3.tif	L7 05	14	54.0839	0.221877	VC2808	VC2808_S7	18H	L_05
23	05 l7 51.tif	L7 05	15	126.449	0.181891	VC2808	VC2808_S8	18H	L_05
40	2 l7 13.tif	L7 2	16	106.399	0.375942	VC2808	VC2808_S9	18H	L_2
17	2 l7 15.tif	L7 2	17	103.785	0.1638	VC2808	VC2808_S9	18H	L_2
55	2 l7 16.tif	L7 2	18	185.825	0.295977	VC2808	VC2808_S9	18H	L_2
31	2 l7 26.tif	L7 2	19	223.504	0.1387	VC2808	VC2808_S10	18H	L_2
12	2 l7 30.tif	L7 2	20	128.516	0.0933735	VC2808	VC2808_S10	18H	L_2
23	2 l7 53.tif	L7 2	21	156.026	0.147411	VC2808	VC2808_S11	18H	L_2
35	2 l7 55.tif	L7 2	22	184.055	0.19016	VC2808	VC2808_S11	18H	L_2
57	2 l7 57.tif	L7 2	23	373.104	0.152772	VC2808	VC2808_S11	18H	L_2
12	2 l7 62.tif	L7 2	25	127.674	0.0939893	VC2808	VC2808_S12	18H	L_2
12	2 l7 64.tif	L7 2	26	166.199	0.0722026	VC2808	VC2808_S12	18H	L_2
20	mk 11.tif	MK 2	27	78.971	0.253257	VC2808	VC2808_S13	18H	MK_2
36	m 43.tif	MK 2	28	130.608	0.275633	VC2808	VC2808_S14	18H	MK_2
30	mk 45.tif	MK 2	29	318.531	0.0941824	VC2808	VC2808_S14	18H	MK_2
24	mk 47 bottom.tif	MK 2	30	189.974	0.126333	VC2808	VC2808_S14	18H	MK_2
27	mk 49.tif	MK 2	32	132.546	0.203702	VC2808	VC2808_S14	18H	MK_2
33	mk 66.tif	MK 2	33	175.84	0.187671	VC2808	VC2808_S15	18H	MK_2
37	mk 68.tif	MK 2	34	296.862	0.124637	VC2808	VC2808_S15	18H	MK_2
28	mk 72.tif	MK 2	35	169.552	0.165141	VC2808	VC2808_S15	18H	MK_2
31	mk 74.tif	MK 2	36	174.447	0.177705	VC2808	VC2808_S15	18H	MK_2
15	mk 9.tif	MK 2	37	68.6136	0.218616	VC2808	VC2808_S13	18H	MK_2
22	Copy of ctl_10.tif	CTL	1	194.394	0.113172	VC2819	VC2819_S1	18H	CTL
92	Copy of ctl_11.tif	CTL	2	233.399	0.394175	VC2819	VC2819_S1	18H	CTL
74	Copy of ctl_12.tif	CTL	3	338.013	0.218926	VC2819	VC2819_S1	18H	CTL
40	Copy of ctl_13.tif	CTL	4	186.865	0.214058	VC2819	VC2819_S1	18H	CTL
20	Copy of ctl_20.tif	CTL	6	106.552	0.187702	VC2819	VC2819_S2	18H	CTL
41	Copy of ctl_28.tif	CTL	8	125.295	0.327227	VC2819	VC2819_S3	18H	CTL
10	Copy of ctl_29.tif	CTL	9	68.5475	0.145884	VC2819	VC2819_S3	18H	CTL
60	Copy of ctl_38.tif	CTL	10	129.277	0.464118	VC2819	VC2819_S4	18H	CTL
11	Copy of L_15.tif	L7 2	12	82.8721	0.132735	VC2819	VC2819_S5	18H	L_2
51	Copy of L_17.tif	L7 2	14	249.4	0.204491	VC2819	VC2819_S5	18H	L_2
23	Copy of L_25.tif	L7 2	19	110.388	0.208357	VC2819	VC2819_S6	18H	L_2
57	Copy of L_30.tif	L7 2	21	309.397	0.184229	VC2819	VC2819_S7	18H	L_2
29	Copy of L_33.tif	L7 2	24	234.202	0.123825	VC2819	VC2819_S7	18H	L_2
14	Copy of L_46.tif	L7 2	29	123.588	0.113279	VC2819	VC2819_S10	18H	L_2
24	Copy of L_47.tif	L7 2	30	197.067	0.121786	VC2819	VC2819_S10	18H	L_2
22	Copy of L_57.tif	L7 2	31	73.3032	0.300123	VC2819	VC2819_S11	18H	L_2
17	Copy of L_58.tif	L7 2	32	190.246	0.0893579	VC2819	VC2819_S11	18H	L_2
34	Copy of L_59.tif	L7 2	33	272.911	0.124583	VC2819	VC2819_S11	18H	L_2
45	Copy of m_41.tif	MK	39	306.175	0.146975	VC2819	VC2819_S13	18H	MK_1
33	Copy of m_51.tif	MK	42	168.027	0.196397	VC2819	VC2819_S14	18H	MK_1
31	Copy of m_52.tif	MK	43	148.998	0.208056	VC2819	VC2819_S14	18H	MK_1
61	Copy of m_54.tif	MK	45	243.97	0.25003	VC2819	VC2819_S14	18H	MK_1
43	Copy of m_55.tif	MK	46	128.37	0.334968	VC2819	VC2819_S14	18H	MK_1
54	Copy of m_60.tif	MK	49	410.155	0.131658	VC2819	VC2819_S15	18H	MK_1
59	Copy of m_62.tif	MK	51	223.071	0.264489	VC2819	VC2819_S15	18H	MK_1
47	Copy of m_63.tif	MK	52	313.236	0.150046	VC2819	VC2819_S15	18H	MK_1
43	Copy of m_7.tif	MK	53	182.511	0.235602	VC2819	VC2819_S12	18H	MK_1
78	Copy of m_9.tif	MK	55	223.546	0.348921	VC2819	VC2819_S12	18H	MK_1
32	ctl_10.tif	CTL	1	124.275	0.257493	VC2820	VC2820_S1	18H	CTL
16	ctl_19.tif	CTL	4	57.2573	0.279441	VC2820	VC2820_S2	18H	CTL
21	ctl_20.tif	CTL	5	54.5243	0.385149	VC2820	VC2820_S2	18H	CTL
17	ctl_2.tif	CTL	6	51.4886	0.33017	VC2820	VC2820_S3	18H	CTL
66	ctl_3.tif	CTL	7	187.556	0.351894	VC2820	VC2820_S3	18H	CTL
24	ctl_4.tif	CTL	8	118.615	0.202336	VC2820	VC2820_S3	18H	CTL
7	ctl_8.tif	CTL	9	63.9528	0.109456	VC2820	VC2820_S1	18H	CTL
26	ctl_9.tif	CTL	10	132.872	0.195678	VC2820	VC2820_S1	18H	CTL
35	L_16.tif	L7 2	12	149.752	0.23372	VC2820	VC2820_S2	18H	L_2
16	L_21.tif	L7 2	13	82.5242	0.193883	VC2820	VC2820_S3	18H	L_2
43	L_22.tif	L7 2	14	202.103	0.212763	VC2820	VC2820_S3	18H	L_2
29	L_5.tif	L7 2	15	234.634	0.123597	VC2820	VC2820_S4	18H	L_2
12	L_6.tif	L7 2	16	133.401	0.0899543	VC2820	VC2820_S4	18H	L_2
36	L_7.tif	L7 2	17	206.288	0.174513	VC2820	VC2820_S4	18H	L_2
34	MK_23.tif	MK 1	18	156.426	0.217356	VC2820	VC2820_S4	18H	MK_1
21	MK_24.tif	MK 1	19	109.836	0.191194	VC2820	VC2820_S4	18H	MK_1
11	ctl_16.tif	CTL	1	107.461	0.102363	VC2821	VC2821_S1	18H	CTL
20	ctl_17.tif	CTL	2	87.2676	0.22918	VC2821	VC2821_S1	18H	CTL
34	ctl_18.tif	CTL	3	118.242	0.287545	VC2821	VC2821_S1	18H	CTL
11	ctl_7.tif	CTL	5	93.0424	0.118226	VC2821	VC2821_S2	18H	CTL
15	ctl_8.tif	CTL	6	151.937	0.098725	VC2821	VC2821_S2	18H	CTL
17	ctl_28.tif	CTL	8	140.671	0.120849	VC2821	VC2821_S3	18H	CTL
11	ctk_29.tif	CTL	9	142.275	0.0773151	VC2821	VC2821_S3	18H	CTL
17	ctl_30.tif	CTL	10	232.553	0.0731015	VC2821	VC2821_S3	18H	CTL
14	L_19.tif	L7 2	11	152.114	0.092036	VC2821	VC2821_S4	18H	L_2
13	L_1.tif	L7 2	12	230.055	0.0565081	VC2821	VC2821_S5	18H	L_2
28	L_21.tif	L7 2	13	214.852	0.130322	VC2821	VC2821_S4	18H	L_2
11	L_22.tif	L7 2	14	134.563	0.0817459	VC2821	VC2821_S4	18H	L_2
20	L_24.tif	L7 2	15	161.162	0.124099	VC2821	VC2821_S6	18H	L_2
19	L_25.tif	L7 2	16	245.198	0.0774885	VC2821	VC2821_S6	18H	L_2
22	L_3.tif	L7 2	18	224.581	0.0979603	VC2821	VC2821_S5	18H	L_2
13	mk_11.tif	MK 1	19	241.915	0.0537379	VC2821	VC2821_S7	18H	MK_1
60	mk_12.tif	MK 1	20	320.741	0.187067	VC2821	VC2821_S7	18H	MK_1
20	mk_13.tif	MK 1	21	107.826	0.185484	VC2821	VC2821_S8	18H	MK_1
38	mk_14.tif	MK 1	22	323.917	0.117314	VC2821	VC2821_S8	18H	MK_1
34	mk_9.tif	MK 1	24	136.17	0.249688	VC2821	VC2821_S7	18H	MK_1
49	ctl_12.tif	CTL	2	256.185	0.191268	VC2822	VC2822_S1	24H	CTL
81	ctl_13.tif	CTL	3	433.498	0.186852	VC2822	VC2822_S1	24H	CTL
13	ctl_14.tif	CTL	4	77.4264	0.167901	VC2822	VC2822_S1	24H	CTL
19	ctl_16.tif	CTL	5	146.991	0.129259	VC2822	VC2822_S1	24H	CTL
37	ctl_21.tif	CTL	6	211.285	0.175119	VC2822	VC2822_S2	24H	CTL
32	ctl_22.tif	CTL	7	227.354	0.14075	VC2822	VC2822_S2	24H	CTL
47	ctl_23.tif	CTL	9	178.07	0.26394	VC2822	VC2822_S2	24H	CTL
36	ctl_3.tif	CTL	10	217.05	0.16586	VC2822	VC2822_S3	24H	CTL
18	L_10.tif	L7 2	13	86.7541	0.207483	VC2822	VC2822_S4	24H	L_2
25	L_17.tif	L7 2	14	283.263	0.0882573	VC2822	VC2822_S5	24H	L_2
43	L_18.tif	L7 2	15	283.6	0.151622	VC2822	VC2822_S5	24H	L_2
26	L_19.tif	L7 2	16	144.709	0.179671	VC2822	VC2822_S5	24H	L_2
24	L_20.tif	L7 2	17	264.811	0.0906306	VC2822	VC2822_S5	24H	L_2
25	L_7.tif	L7 2	18	106.738	0.234219	VC2822	VC2822_S4	24H	L_2
21	L_8.tif	L7 2	19	175.07	0.119952	VC2822	VC2822_S4	24H	L_2
54	L_9.tif	L7 2	20	247.451	0.218225	VC2822	VC2822_S4	24H	L_2
13	MK_1.tif	MK 2	21	97.6476	0.133132	VC2822	VC2822_S5	24H	MK_2
21	MK_24.tif	MK 2	22	121.033	0.173507	VC2822	VC2822_S5	24H	MK_2
16	MK_2.tif	MK 2	23	104.52	0.153081	VC2822	VC2822_S6	24H	MK_2
27	ctl_10.tif	CTL	1	94.4163	0.285967	VC2823	VC2823_S3	24H	CTL
8	ctl_11.tif	CTL	2	66.0922	0.121043	VC2823	VC2823_S1	24H	CTL
20	ctl_12.tif	CTL	3	88.7048	0.225467	VC2823	VC2823_S2	24H	CTL
19	ctl_1.tif	CTL	4	103.826	0.182998	VC2823	VC2823_S2	24H	CTL
15	ctl_2.tif	CTL	5	225.157	0.0666203	VC2823	VC2823_S3	24H	CTL
27	ctl_9_maybedrop.tif	CTL	7	173.903	0.155259	VC2823	VC2823_S1	24H	CTL
24	m_13.tif	MK	8	141.103	0.170088	VC2823	VC2823_S5	24H	MK_1
12	m_14.tif	MK	9	76.7586	0.156334	VC2823	VC2823_S5	24H	MK_1
41	m_15.tif	MK	10	273.265	0.150038	VC2823	VC2823_S6	24H	MK_1
31	m_16.tif	MK	11	200.114	0.154912	VC2823	VC2823_S6	24H	MK_1
24	m_4.tif	MK	13	127.35	0.188457	VC2823	VC2823_S7	24H	MK_1
31	m_5.tif	MK	14	162.281	0.191026	VC2823	VC2823_S7	24H	MK_1
29	L_17.tif	L7	15	161.285	0.179806	VC2823	VC2823_S8	24H	L_1
13	L_18.tif	L7	16	64.7233	0.200855	VC2823	VC2823_S8	24H	L_1
32	L_6.tif	L7	17	237.29	0.134856	VC2823	VC2823_S9	24H	L_1
43	L_7.tif	L7	18	143.87	0.298882	VC2823	VC2823_S9	24H	L_1
31	ctl_11.tif	CTL	1	305.91	0.101337	VC2826	VC2826_S1	24H	CTL
19	ctl_6.tif	CTL	2	96.7813	0.196319	VC2826	VC2826_S2	24H	CTL
17	ctl_7.tif	CTL	3	171.604	0.0990653	VC2826	VC2826_S2	24H	CTL
49	ctl_8.tif	CTL	4	363.906	0.13465	VC2826	VC2826_S1	24H	CTL
23	ctl_9.tif	CTL	5	198.262	0.116008	VC2826	VC2826_S1	24H	CTL
85	mk_13.tif	MK	6	461.42	0.184214	VC2826	VC2826_S3	24H	MK_05
17	mk_14.tif	MK	7	110.224	0.154232	VC2826	VC2826_S3	24H	MK_05
38	mk_15.tif	MK	8	165.711	0.229315	VC2826	VC2826_S3	24H	MK_05
15	mk_17.tif	MK	9	146.513	0.10238	VC2826	VC2826_S4	24H	MK_05
34	mk_18.tif	MK	10	234.655	0.144894	VC2826	VC2826_S4	24H	MK_05
29	mk_4.tif	MK	11	220.35	0.131609	VC2826	VC2826_S5	24H	MK_05
26	mk_5.tif	MK	12	189.901	0.136913	VC2826	VC2826_S5	24H	MK_05
25	L_19.tif	L7	13	137.869	0.181331	VC2826	VC2826_S6	24H	L_05
28	L_1.tif	L7	14	122.527	0.22852	VC2826	VC2826_S7	24H	L_05
16	L_21.tif	L7	15	195.792	0.0817195	VC2826	VC2826_S6	24H	L_05
17	L_23.tif	L7	16	238.883	0.0711646	VC2826	VC2826_S8	24H	L_05
9	L_24.tif	L7	17	149.41	0.0602367	VC2826	VC2826_S8	24H	L_05
33	L_2.tif	L7	18	228.925	0.144152	VC2826	VC2826_S7	24H	L_05
28	Copy of Image 16_Maximum intensity projection.tif	CTL	1	171.034	0.16371	VC2827	VC2827_S3	24H	CTL
44	Copy of Image 1_Maximum intensity projection.tif	CTL	2	288.267	0.152636	VC2827	VC2827_S1	24H	CTL
44	Copy of Image 3_Maximum intensity projection.tif	CTL	3	147.163	0.298989	VC2827	VC2827_S2	24H	CTL
28	Copy of Image 2_Maximum intensity projection.tif	CTL	5	201.033	0.13928	VC2827	VC2827_S1	24H	CTL
27	Copy of Image 5_Maximum intensity projection.tif	L7	6	233.85	0.115459	VC2827	VC2827_S4	24H	L_05
12	Copy of Image 7_Maximum intensity projection.tif	L7	8	103.575	0.115858	VC2827	VC2827_S4	24H	L_05
6	Copy of Image 8_Maximum intensity projection.tif	L7	9	110.973	0.0540671	VC2827	VC2827_S5	24H	L_05
24	Copy of Image 9_Maximum intensity projection.tif	L7	10	196.844	0.121924	VC2827	VC2827_S5	24H	L_05
11	Copy of Image 10_Maximum intensity projection.tif	MK	11	184.025	0.0597745	VC2827	VC2827_S6	24H	MK_0125
9	Copy of Image 11_Maximum intensity projection.tif	MK	12	172.037	0.0523143	VC2827	VC2827_S6	24H	MK_0125
26	Copy of Image 12_Maximum intensity projection.tif	MK	13	98.2156	0.264724	VC2827	VC2827_S7	24H	MK_0125
5	Copy of Image 14_Maximum intensity projection.tif	MK	15	77.4155	0.0645866	VC2827	VC2827_S8	24H	MK_0125
26	ctl_10.tif	CTL	1	144.197	0.180309	VC2829	VC2829_S1	24H	CTL
19	ctl_11.tif	CTL	2	161.043	0.117981	VC2829	VC2829_S1	24H	CTL
46	ctl_27.tif	CTL	3	200.942	0.228922	VC2829	VC2829_S2	24H	CTL
35	ctl_28.tif	CTL	4	171.796	0.20373	VC2829	VC2829_S2	24H	CTL
47	ctl_30.tif	CTL	6	223.892	0.209923	VC2829	VC2829_S2	24H	CTL
27	ctl_8.tif	CTL	7	138.466	0.194994	VC2829	VC2829_S1	24H	CTL
10	ctl_9.tif	CTL	8	107.718	0.0928352	VC2829	VC2829_S1	24H	CTL
8	L_13.tif	L_0.5	10	99.3749	0.0805032	VC2829	VC2829_S2	24H	L_05
15	L_14.tif	L_0.5	11	62.2781	0.240855	VC2829	VC2829_S2	24H	L_05
37	L_15.tif	L_0.5	12	141.891	0.260763	VC2829	VC2829_S2	24H	L_05
26	L_16.tif	L_0.5	13	106.307	0.244575	VC2829	VC2829_S2	24H	L_05
15	L_22.tif	L_0.5	14	121.286	0.123675	VC2829	VC2829_S3	24H	L_05
23	L_23.tif	L_0.5	15	118.004	0.194909	VC2829	VC2829_S3	24H	L_05
23	L_25.tif	L_0.5	16	142.557	0.161339	VC2829	VC2829_S3	24H	L_05
31	M_17.tif	M_0.125	17	147.416	0.210289	VC2829	VC2829_S4	24H	MK_0125
18	M_18.tif	M_0.125	18	90.9847	0.197835	VC2829	VC2829_S4	24H	MK_0125
24	M_19.tif	M_0.125	19	130.986	0.183226	VC2829	VC2829_S4	24H	MK_0125
10	M_20.tif	M_0.125	20	48.0167	0.208261	VC2829	VC2829_S4	24H	MK_0125
23	M_21.tif	M_0.125	21	131.086	0.175457	VC2829	VC2829_S4	24H	MK_0125
12	M_26.tif	M_0.125	22	119.939	0.100051	VC2829	VC2829_S5	24H	MK_0125
13	M_6.tif	M_0.125	23	113.437	0.114601	VC2829	VC2829_S6	24H	MK_0125
24	ctl_7.tif	CTL	1	353.942	0.0678077	VC2832	VC2832_6H_S1	6H	CTL
18	ctl_8.tif	CTL	2	91.9046	0.195855	VC2832	VC2832_6H_S2	6H	CTL
31	ctl_9.tif	CTL	3	241.454	0.128389	VC2832	VC2832_6H_S2	6H	CTL
33	L_4.tif	L7	8	108.645	0.303742	VC2832	VC2832_6H_S5	6H	L_2
22	L_5.tif	L7	9	202.06	0.108878	VC2832	VC2832_6H_S5	6H	L_2
28	L_6_redoreg.tif	L7	12	298.056	0.093942	VC2832	VC2832_6H_S5	6H	L_2
17	m_11.tif	MK	5	119.769	0.14194	VC2832	VC2832_6H_S3	6H	MK_1
20	m_12.tif	MK	6	89.1397	0.224367	VC2832	VC2832_6H_S4	6H	MK_1
25	m_13.tif	MK	7	161.589	0.154713	VC2832	VC2832_6H_S4	6H	MK_1
11	m_10_redoreg.tif	MK	11	97.0744	0.113315	VC2832	VC2832_6H_S3	6H	MK_1
18	ctl_11.tif	CTL	1	129.765	0.138712	VC2832	VC2832_S1	24H	CTL
50	ctl_12.tif	CTL	2	173.395	0.288358	VC2832	VC2832_S1	24H	CTL
31	ctl_2.tif	CTL	3	144.738	0.21418	VC2832	VC2832_S2	24H	CTL
21	ctl_3.tif	CTL	4	115.467	0.18187	VC2832	VC2832_S2	24H	CTL
47	ctl_4.tif	CTL	5	158.727	0.296106	VC2832	VC2832_S2	24H	CTL
18	ctl_8.tif	CTL	8	69.6711	0.258357	VC2832	VC2832_S3	24H	CTL
10	ctl_9.tif	CTL	9	111.526	0.089665	VC2832	VC2832_S3	24H	CTL
44	m_18.tif	MK	10	186.077	0.236461	VC2832	VC2832_S4	24H	MK_0125
48	m_20.tif	MK	12	233.892	0.205223	VC2832	VC2832_S4	24H	MK_0125
23	m_21.tif	MK	13	141.106	0.162998	VC2832	VC2832_S5	24H	MK_0125
17	m_22.tif	MK	14	134.563	0.126335	VC2832	VC2832_S5	24H	MK_0125
31	m_23.tif	MK	15	221.494	0.139959	VC2832	VC2832_S5	24H	MK_0125
12	L_13.tif	L7	16	125.593	0.0955466	VC2832	VC2832_S6	24H	L_05
32	L_14.tif	L7	17	200.22	0.159824	VC2832	VC2832_S6	24H	L_05
9	L_15.tif	L7	18	72.4335	0.124252	VC2832	VC2832_S7	24H	L_05
10	L_16.tif	L7	19	71.4492	0.13996	VC2832	VC2832_S7	24H	L_05
12	L_17.tif	L7	20	129.37	0.0927572	VC2832	VC2832_S7	24H	L_05
11	ctl_1.tif	CTL	1	75.3914	0.145905	VC2835	VC2835_S1	6H	CTL
12	ctl_24.tif	CTL	3	58.55	0.204953	VC2835	VC2835_S3	6H	CTL
7	ctl_25.tif	CTL	4	62.2259	0.112493	VC2835	VC2835_S3	6H	CTL
15	ctl_2.tif	CTL	5	89.8153	0.167009	VC2835	VC2835_S1	6H	CTL
9	ctl_4.tif	CTL	6	73.043	0.123215	VC2835	VC2835_S1	6H	CTL
20	ctl_5.tif	CTL	7	151.95	0.131622	VC2835	VC2835_S2	6H	CTL
12	ctl_6.tif	CTL	8	132.912	0.0902854	VC2835	VC2835_S2	6H	CTL
22	ctl_7.tif	CTL	9	170.01	0.129404	VC2835	VC2835_S2	6H	CTL
15	L_12.tif	L7	11	149.867	0.100089	VC2835	VC2835_S4	6H	L_2
9	L_13.tif	L7	12	87.2762	0.103121	VC2835	VC2835_S5	6H	L_2
8	L_16.tif	L7	14	57.6471	0.138775	VC2835	VC2835_S5	6H	L_2
33	L_9.tif	L7	17	154.602	0.213451	VC2835	VC2835_S4	6H	L_2
17	M_18.tif	MK	18	50.9714	0.333521	VC2835	VC2835_S5	6H	MK_1
6	M_19.tif	MK	19	116.638	0.0514412	VC2835	VC2835_S5	6H	MK_1
8	M_23.tif	MK	23	91.192	0.087727	VC2835	VC2835_S6	6H	MK_1

## Sheet: Figure_6E
Image.Name	Minute	Summary.Statistic	Area	Average.intensity	Total.intensity	Image	Overlay	Treatment	NormAvgAVG	NormAvgTOT	Dissociation
Red	23	Average	0.045708	13209.7	86141.5	10.tif	GR_R	CTL	0.913749	0.832802	VC2904
Red	23	Average	0.0486051	14318.2	98047.6	12.tif	GR_R	CTL	0.990429	0.947908	VC2904
Red	24	Average	0.050605	14553.5	108883	13.tif	GR_R	CTL	1.0067	1.05267	VC2904
Red	24	Average	0.0574217	16157.7	142340	14.tif	GR_R	CTL	1.11767	1.37612	VC2904
Red	24	Average	0.0478338	15429.4	109168	15.tif	GR_R	CTL	1.06729	1.05542	VC2904
Red	24	Average	0.0522133	14179.2	102661	28.tif	GR_R	CTL	0.98081	0.992507	VC2904
Red	24	Average	0.0491173	14332.7	100615	29.tif	GR_R	CTL	0.99143	0.97273	VC2904
Red	24	Average	0.0467336	13856.4	94653.9	30.tif	GR_R	CTL	0.958483	0.915098	VC2904
Red	24	Average	0.0528108	15016.9	117726	31.tif	GR_R	CTL	1.03876	1.13815	VC2904
Red	25	Average	0.0445252	13126.4	81116.7	37.tif	GR_R	CTL	0.907986	0.784223	VC2904
Red	25	Average	0.0461119	13706.8	90297.9	39.tif	GR_R	CTL	0.948133	0.872985	VC2904
Red	25	Average	0.0435501	14398.7	87280.3	40.tif	GR_R	CTL	0.995995	0.843812	VC2904
Red	25	Average	0.0435501	13003.7	83855.9	6.tif	GR_R	CTL	0.899497	0.810705	VC2904
Red	25	Average	0.0481564	15334.2	108010	7.tif	GR_R	CTL	1.0607	1.04422	VC2904
Red	25	Average	0.0559048	16207.5	141404	8.tif	GR_R	CTL	1.12111	1.36707	VC2904
Red	25	Average	0.0473138	14474.7	102772	9.tif	GR_R	CTL	1.00125	0.993583	VC2904
Red	25	Average	0.0429453	13322.7	81836.8	17.tif	GR_R	CTL_L2	0.921569	0.791185	VC2904
Red	25	Average	0.0506011	15604.3	114057	18.tif	GR_R	CTL_L2	1.07939	1.10268	VC2904
Red	26	Average	0.0560744	17079.6	137086	19.tif	GR_R	CTL_L2	1.18144	1.32533	VC2904
Red	26	Average	0.0434434	13923.8	87250.1	21.tif	GR_R	CTL_L2	0.963146	0.84352	VC2904
Red	26	Average	0.0529664	14330.1	112086	22.tif	GR_R	CTL_L2	0.991251	1.08363	VC2904
Red	26	Average	0.0558143	15243.3	128528	23.tif	GR_R	CTL_L2	1.05442	1.24259	VC2904
Red	26	Average	0.0492306	13568.9	94095.9	32.tif	GR_R	CTL_L2	0.938593	0.909703	VC2904
Red	26	Average	0.0496717	14481.3	108719	33.tif	GR_R	CTL_L2	1.00171	1.05108	VC2904
Red	26	Average	0.0429793	13680.4	84376.7	34.tif	GR_R	CTL_L2	0.946305	0.81574	VC2904
Red	26	Average	0.0393855	12158.7	66932.1	35.tif	GR_R	CTL_L2	0.841049	0.647089	VC2904
Red	26	Average	0.0390137	12200.9	66343	36.tif	GR_R	CTL_L2	0.843971	0.641393	VC2904
Red	26	Average	0.0476035	13497.3	91850.4	49.tif	GR_R	CTL_L2	0.933641	0.887994	VC2904
Red	27	Average	0.0414463	14540	87379.2	51.tif	GR_R	CTL_L2	1.00577	0.844768	VC2904
Red	27	Average	0.0580669	16266	137290	x52.tif	GR_R	CTL_L2	1.12516	1.3273	VC2904
Red	27	Average	0.0491118	13996.4	96912.1	24.tif	GR_R	sh1826	0.968166	0.93693	VC2904
Red	27	Average	0.0545773	13850.6	112989	25.tif	GR_R	sh1826	0.958085	1.09236	VC2904
Red	27	Average	0.0524935	15510.1	121403	26.tif	GR_R	sh1826	1.07288	1.17371	VC2904
Red	27	Average	0.0636502	16990.7	164489	27.tif	GR_R	sh1826	1.17529	1.59025	VC2904
Red	27	Average	0.0508085	14918	108976	41.tif	GR_R	sh1826	1.03192	1.05356	VC2904
Red	27	Average	0.0554834	14788.9	117893	42.tif	GR_R	sh1826	1.02299	1.13977	VC2904
Red	28	Average	0.0506716	14123	105724	44.tif	GR_R	sh1826	0.976922	1.02212	VC2904
Red	28	Average	0.051589	16712.6	127237	45.tif	GR_R	sh1826	1.15605	1.23011	VC2904
Red	28	Average	0.0594892	15766.7	148733	46.tif	GR_R	sh1826	1.09062	1.43793	VC2904
Red	28	Average	0.0618566	15602	141463	54.tif	GR_R	sh1826	1.07923	1.36764	VC2904
Red	28	Average	0.0677447	17797.3	177914	2.tif	GR_R	sh1826_L2	1.23109	1.72004	VC2904
Red	28	Average	0.0668038	15787.4	161110	3.tif	GR_R	sh1826_L2	1.09206	1.55758	VC2904
Red	28	Average	0.0622239	17377.6	169508	4.tif	GR_R	sh1826_L2	1.20205	1.63878	VC2904
Red	29	Average	0.0595006	14169.2	124906	55.tif	GR_R	sh1826_L2	0.980123	1.20757	VC2904
Red	29	Average	0.0486393	14558.8	103438	56.tif	GR_R	sh1826_L2	1.00707	1.00002	VC2904
Red	29	Average	0.0638736	17268.3	161315	5.tif	GR_R	sh1826_L2	1.19449	1.55957	VC2904
Red	50	Average	0.0430317	13771.5	88489.4	MAX_Image 50.tif	GR_R	CTL_L2	0.952611	0.855501	VC2904
Red	49	Average	0.109057	10972.3	194722	29.tif	GR_R	CTL	0.914768	0.888574	VC2903
Red	55	Average	0.108448	10558	180745	31.tif	GR_R	CTL	0.880221	0.824794	VC2903
Red	59	Average	0.101054	10088.4	153597	32.tif	GR_R	CTL	0.841076	0.700909	VC2903
Red	1	Average	0.120627	13550.6	261128	33.tif	GR_R	CTL	1.12972	1.19161	VC2903
Red	4	Average	0.121351	11892.3	233005	34.tif	GR_R	CTL	0.991461	1.06327	VC2903
Red	5	Average	0.10535	11810.2	196693	35.tif	GR_R	CTL	0.98462	0.897571	VC2903
Red	7	Average	0.119823	13160.7	236917	51.tif	GR_R	CTL	1.09721	1.08112	VC2903
Red	11	Average	0.123677	12702.2	237243	52.tif	GR_R	CTL	1.05899	1.08261	VC2903
Red	12	Average	0.132074	13217.4	278206	55.tif	GR_R	CTL	1.10193	1.26954	VC2903
Red	51	Average	0.103491	10605.9	168741	20.tif	GR_R	CTL_L2	0.884215	0.770016	VC2903
Red	55	Average	0.115109	11718.5	201531	21.tif	GR_R	CTL_L2	0.976974	0.919648	VC2903
Red	58	Average	0.109626	10189	166120	22.tif	GR_R	CTL_L2	0.849456	0.758055	VC2903
Red	2	Average	0.111751	11850.7	199810	23.tif	GR_R	CTL_L2	0.987996	0.911795	VC2903
Red	8	Average	0.111515	10521	183064	24.tif	GR_R	CTL_L2	0.877142	0.835375	VC2903
Red	12	Average	0.108707	12085.9	214102	25.tif	GR_R	CTL_L2	1.00761	0.977011	VC2903
Red	17	Average	0.100407	10920.1	178945	26.tif	GR_R	CTL_L2	0.91041	0.81658	VC2903
Red	19	Average	0.1143	10297.7	193908	27.tif	GR_R	CTL_L2	0.858519	0.884861	VC2903
Red	21	Average	0.122355	11151.9	206301	28.tif	GR_R	CTL_L2	0.929734	0.941416	VC2903
Red	22	Average	0.0990487	10095.6	153073	43.tif	GR_R	CTL_L2	0.841674	0.69852	VC2903
Red	25	Average	0.111597	11171.2	207280	44.tif	GR_R	CTL_L2	0.931347	0.945883	VC2903
Red	28	Average	0.111336	12990.7	227483	46.tif	GR_R	CTL_L2	1.08304	1.03808	VC2903
Red	30	Average	0.116019	9609.81	186369	47.tif	GR_R	CTL_L2	0.801173	0.850461	VC2903
Red	31	Average	0.109155	9840.81	165959	48.tif	GR_R	CTL_L2	0.820432	0.75732	VC2903
Red	34	Average	0.123444	11025.5	212385	49.tif	GR_R	CTL_L2	0.919203	0.969179	VC2903
Red	36	Average	0.100882	10629.3	159086	50.tif	GR_R	CTL_L2	0.886169	0.72596	VC2903
Red	39	Average	0.0968296	10530.9	155205	56R.tif	GR_R	CTL_L2	0.877966	0.708248	VC2903
Red	4	Average	0.103532	12971.2	203759	10.tif	GR_R	sh1826	1.08142	0.929814	VC2903
Red	7	Average	0.142264	13369.2	294704	2.tif	GR_R	sh1826	1.1146	1.34482	VC2903
Red	8	Average	0.131151	12804.8	265191	36.tif	GR_R	sh1826	1.06754	1.21015	VC2903
Red	11	Average	0.121886	13210.1	252314	38.tif	GR_R	sh1826	1.10133	1.15139	VC2903
Red	15	Average	0.117359	12527.8	222457	39.tif	GR_R	sh1826	1.04444	1.01514	VC2903
Red	19	Average	0.111208	11728.6	203688	3.tif	GR_R	sh1826	0.977817	0.92949	VC2903
Red	21	Average	0.120116	12697.4	237991	40.tif	GR_R	sh1826	1.05859	1.08603	VC2903
Red	23	Average	0.111879	12098.3	206883	4.tif	GR_R	sh1826	1.00864	0.944072	VC2903
Red	27	Average	0.133392	12249.2	255554	58.tif	GR_R	sh1826	1.02122	1.16617	VC2903
Red	32	Average	0.122283	13068	246851	59.tif	GR_R	sh1826	1.08949	1.12646	VC2903
Red	34	Average	0.122191	12841	239001	5.tif	GR_R	sh1826	1.07056	1.09063	VC2903
Red	37	Average	0.134775	13123.4	282963	60.tif	GR_R	sh1826	1.0941	1.29125	VC2903
Red	41	Average	0.13165	12700.6	267597	61.tif	GR_R	sh1826	1.05885	1.22112	VC2903
Red	44	Average	0.131423	12683.3	246924	6.tif	GR_R	sh1826	1.05741	1.12679	VC2903
Red	45	Average	0.121412	14195.8	273281	7.tif	GR_R	sh1826	1.18351	1.24707	VC2903
Red	49	Average	0.106583	12271	201510	8.tif	GR_R	sh1826	1.02304	0.919551	VC2903
Red	54	Average	0.112922	12072.2	213708	11.tif	GR_R	sh1826_L2	1.00647	0.975214	VC2903
Red	56	Average	0.120389	14534.9	263571	12.tif	GR_R	sh1826_L2	1.21178	1.20276	VC2903
Red	57	Average	0.119348	13662.3	251638	13.tif	GR_R	sh1826_L2	1.13903	1.1483	VC2903
Red	59	Average	0.141215	13913.3	299265	14.tif	GR_R	sh1826_L2	1.15996	1.36564	VC2903
Red	2	Average	0.119314	13246.2	240483	15.tif	GR_R	sh1826_L2	1.10434	1.0974	VC2903
Red	4	Average	0.147906	15255.1	364487	16.tif	GR_R	sh1826_L2	1.27182	1.66327	VC2903
Red	6	Average	0.132553	15558.6	324837	17.tif	GR_R	sh1826_L2	1.29713	1.48233	VC2903
Red	9	Average	0.135073	15127.1	311283	18.tif	GR_R	sh1826_L2	1.26115	1.42048	VC2903
Red	12	Average	0.115327	12367.6	218337	19.tif	GR_R	sh1826_L2	1.03109	0.996338	VC2903
Red	14	Average	0.118051	14054.7	277953	41.tif	GR_R	sh1826_L2	1.17174	1.26839	VC2903
Red	17	Average	0.13705	12359.4	261085	42.tif	GR_R	sh1826_L2	1.0304	1.19141	VC2903
Red	20	Average	0.115439	11144.1	202234	62.tif	GR_R	sh1826_L2	0.929087	0.922856	VC2903
Red	22	Average	0.14655	13252.2	345137	63.tif	GR_R	sh1826_L2	1.10484	1.57497	VC2903
Red	23	Average	0.129323	13195.8	263862	65.tif	GR_R	sh1826_L2	1.10014	1.20408	VC2903
Red	25	Average	0.13267	11135.3	223111	66.tif	GR_R	sh1826_L2	0.928357	1.01812	VC2903
Red	5	Average	0.100937	15935.2	239358	27.tif	GR_R	CTL	0.826862	0.743508	VC2902
Red	6	Average	0.114878	22227.6	399898	29.tif	GR_R	CTL	1.15337	1.24218	VC2902
Red	6	Average	0.109027	21227.2	349603	30.tif	GR_R	CTL	1.10146	1.08595	VC2902
Red	6	Average	0.10321	19254.3	291566	37.tif	GR_R	CTL	0.999089	0.905679	VC2902
Red	6	Average	0.117585	18954.4	333926	38.tif	GR_R	CTL	0.983525	1.03726	VC2902
Red	6	Average	0.116825	18032.6	317236	39.tif	GR_R	CTL	0.935694	0.985417	VC2902
Red	7	Average	0.115519	18579.6	321762	20.tif	GR_R	CTL_L2	0.964078	0.999475	VC2902
Red	7	Average	0.085068	16808.2	205120	21.tif	GR_R	CTL_L2	0.872163	0.637156	VC2902
Red	7	Average	0.0939554	15712.2	215673	22.tif	GR_R	CTL_L2	0.815294	0.669934	VC2902
Red	7	Average	0.111109	12909.7	219946	24.tif	GR_R	CTL_L2	0.669875	0.683207	VC2902
Red	8	Average	0.114434	17902.5	311900	25.tif	GR_R	CTL_L2	0.928942	0.96884	VC2902
Red	8	Average	0.117343	20158.9	381065	26.tif	GR_R	CTL_L2	1.04603	1.18369	VC2902
Red	8	Average	0.0891125	15263.3	194901	31.tif	GR_R	CTL_L2	0.791997	0.605411	VC2902
Red	8	Average	0.122391	18217.5	324212	32.tif	GR_R	CTL_L2	0.945287	1.00709	VC2902
Red	8	Average	0.103336	15764	241068	33.tif	GR_R	CTL_L2	0.817981	0.74882	VC2902
Red	8	Average	0.111779	17872.5	287629	34.tif	GR_R	CTL_L2	0.927389	0.893449	VC2902
Red	8	Average	0.0834711	14697.5	171190	35.tif	GR_R	CTL_L2	0.762642	0.531758	VC2902
Red	9	Average	0.0988392	15962.4	229375	36.tif	GR_R	CTL_L2	0.828273	0.712496	VC2902
Red	9	Average	0.124648	20198	366327	10.tif	GR_R	sh1826	1.04806	1.13791	VC2902
Red	9	Average	0.111488	16771.2	291095	11.tif	GR_R	sh1826	0.870244	0.904216	VC2902
Red	9	Average	0.111295	19576.7	324656	12.tif	GR_R	sh1826	1.01582	1.00846	VC2902
Red	9	Average	0.142192	21360.9	466546	13.tif	GR_R	sh1826	1.1084	1.44921	VC2902
Red	10	Average	0.118456	21586.4	372992	40.tif	GR_R	sh1826	1.1201	1.15861	VC2902
Red	10	Average	0.0988044	19056.5	277928	42.tif	GR_R	sh1826	0.988825	0.863317	VC2902
Red	10	Average	0.125946	21833.8	416139	43.tif	GR_R	sh1826	1.13293	1.29263	VC2902
Red	10	Average	0.130321	19812.4	404852	44.tif	GR_R	sh1826	1.02805	1.25757	VC2902
Red	10	Average	0.11137	17181.9	271702	8.tif	GR_R	sh1826	0.891551	0.843975	VC2902
Red	11	Average	0.123223	17218	331179	9.tif	GR_R	sh1826	0.893428	1.02873	VC2902
Red	11	Average	0.0997506	16397	245720	14.tif	GR_R	sh1826_L2	0.850823	0.763268	VC2902
Red	11	Average	0.101367	16964.2	250914	16.tif	GR_R	sh1826_L2	0.880257	0.779402	VC2902
Red	11	Average	0.12445	17601.8	325254	17.tif	GR_R	sh1826_L2	0.913341	1.01032	VC2902
Red	11	Average	0.102524	16437	240029	18.tif	GR_R	sh1826_L2	0.8529	0.745592	VC2902
Red	12	Average	0.115575	19977.9	343511	19.tif	GR_R	sh1826_L2	1.03663	1.06703	VC2902
Red	12	Average	0.1323	24967.2	510498	45.tif	GR_R	sh1826_L2	1.29553	1.58574	VC2902
Red	12	Average	0.127992	26043.8	492819	46.tif	GR_R	sh1826_L2	1.35139	1.53082	VC2902
Red	33	Average	0.115017	19405	341027	47.tif	GR_R	sh1826_L2	1.00691	1.05932	VC2902
Red	12	Average	0.125229	23056.1	442609	48.tif	GR_R	sh1826_L2	1.19636	1.37486	VC2902
Red	12	Average	0.110295	20514.8	340264	Copy of Image 49-Orthogonal Projection-01.tif	GR_R	sh1826_L2	1.06449	1.05695	VC2902
Red	7	Average	0.0983484	6656.98	100452	Copy of Image 15_Maximum intensity projection.tif	GR_R	CTL	0.982165	0.924585	VC2901
Red	12	Average	0.100888	6605.48	108750	Copy of Image 17_Maximum intensity projection.tif	GR_R	CTL	0.974567	1.00096	VC2901
Red	20	Average	0.116678	6215.85	104026	Copy of Image 19_Maximum intensity projection.tif	GR_R	CTL	0.917081	0.957484	VC2901
Red	23	Average	0.105551	7633.14	121354	Copy of Image 21_Maximum intensity projection.tif	GR_R	CTL	1.12619	1.11697	VC2901
Red	6	Average	0.0913025	5520.46	72824.9	Copy of Image 29_Maximum intensity projection.tif	GR_R	CTL_L2	0.814484	0.670299	VC2901
Red	11	Average	0.0818778	5771.08	68166.8	Copy of Image 30_Maximum intensity projection.tif	GR_R	CTL_L2	0.85146	0.627425	VC2901
