# Supplementary figures and images for: Ciliary neuropeptidergic signaling dynamically regulates excitatory synapses in postnatal neocortical pyramidal neurons
Source: eLife journal article supplement (doi:10.7554/elife.65427), 2021-03-02

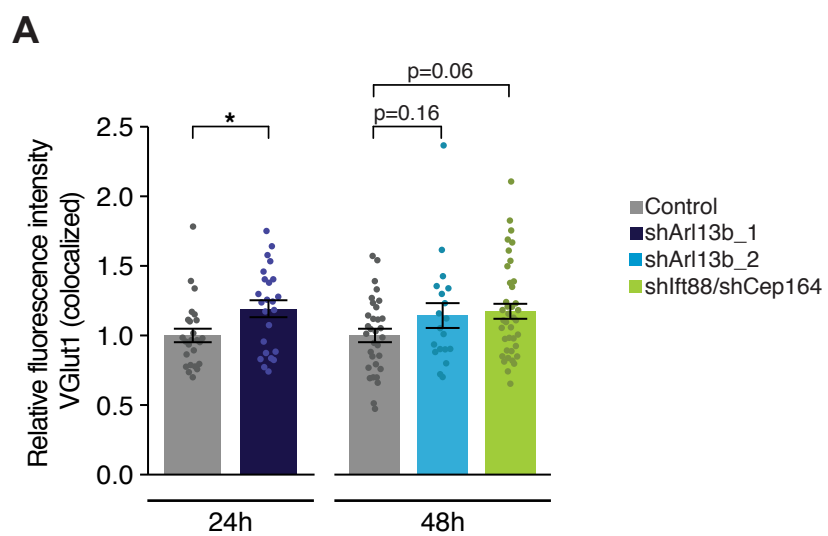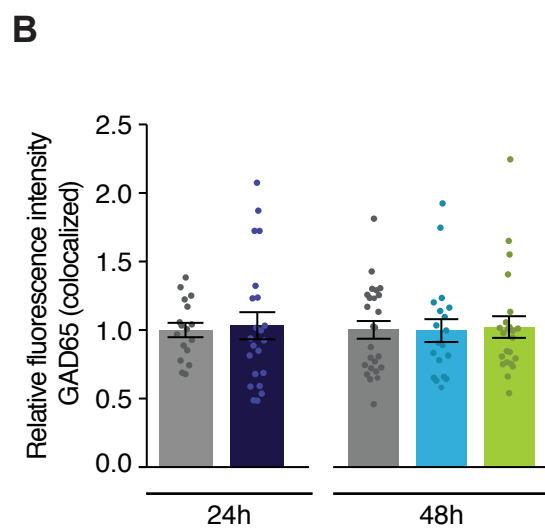

Supplement: supp [file elife-65427-supp-v1.zip]

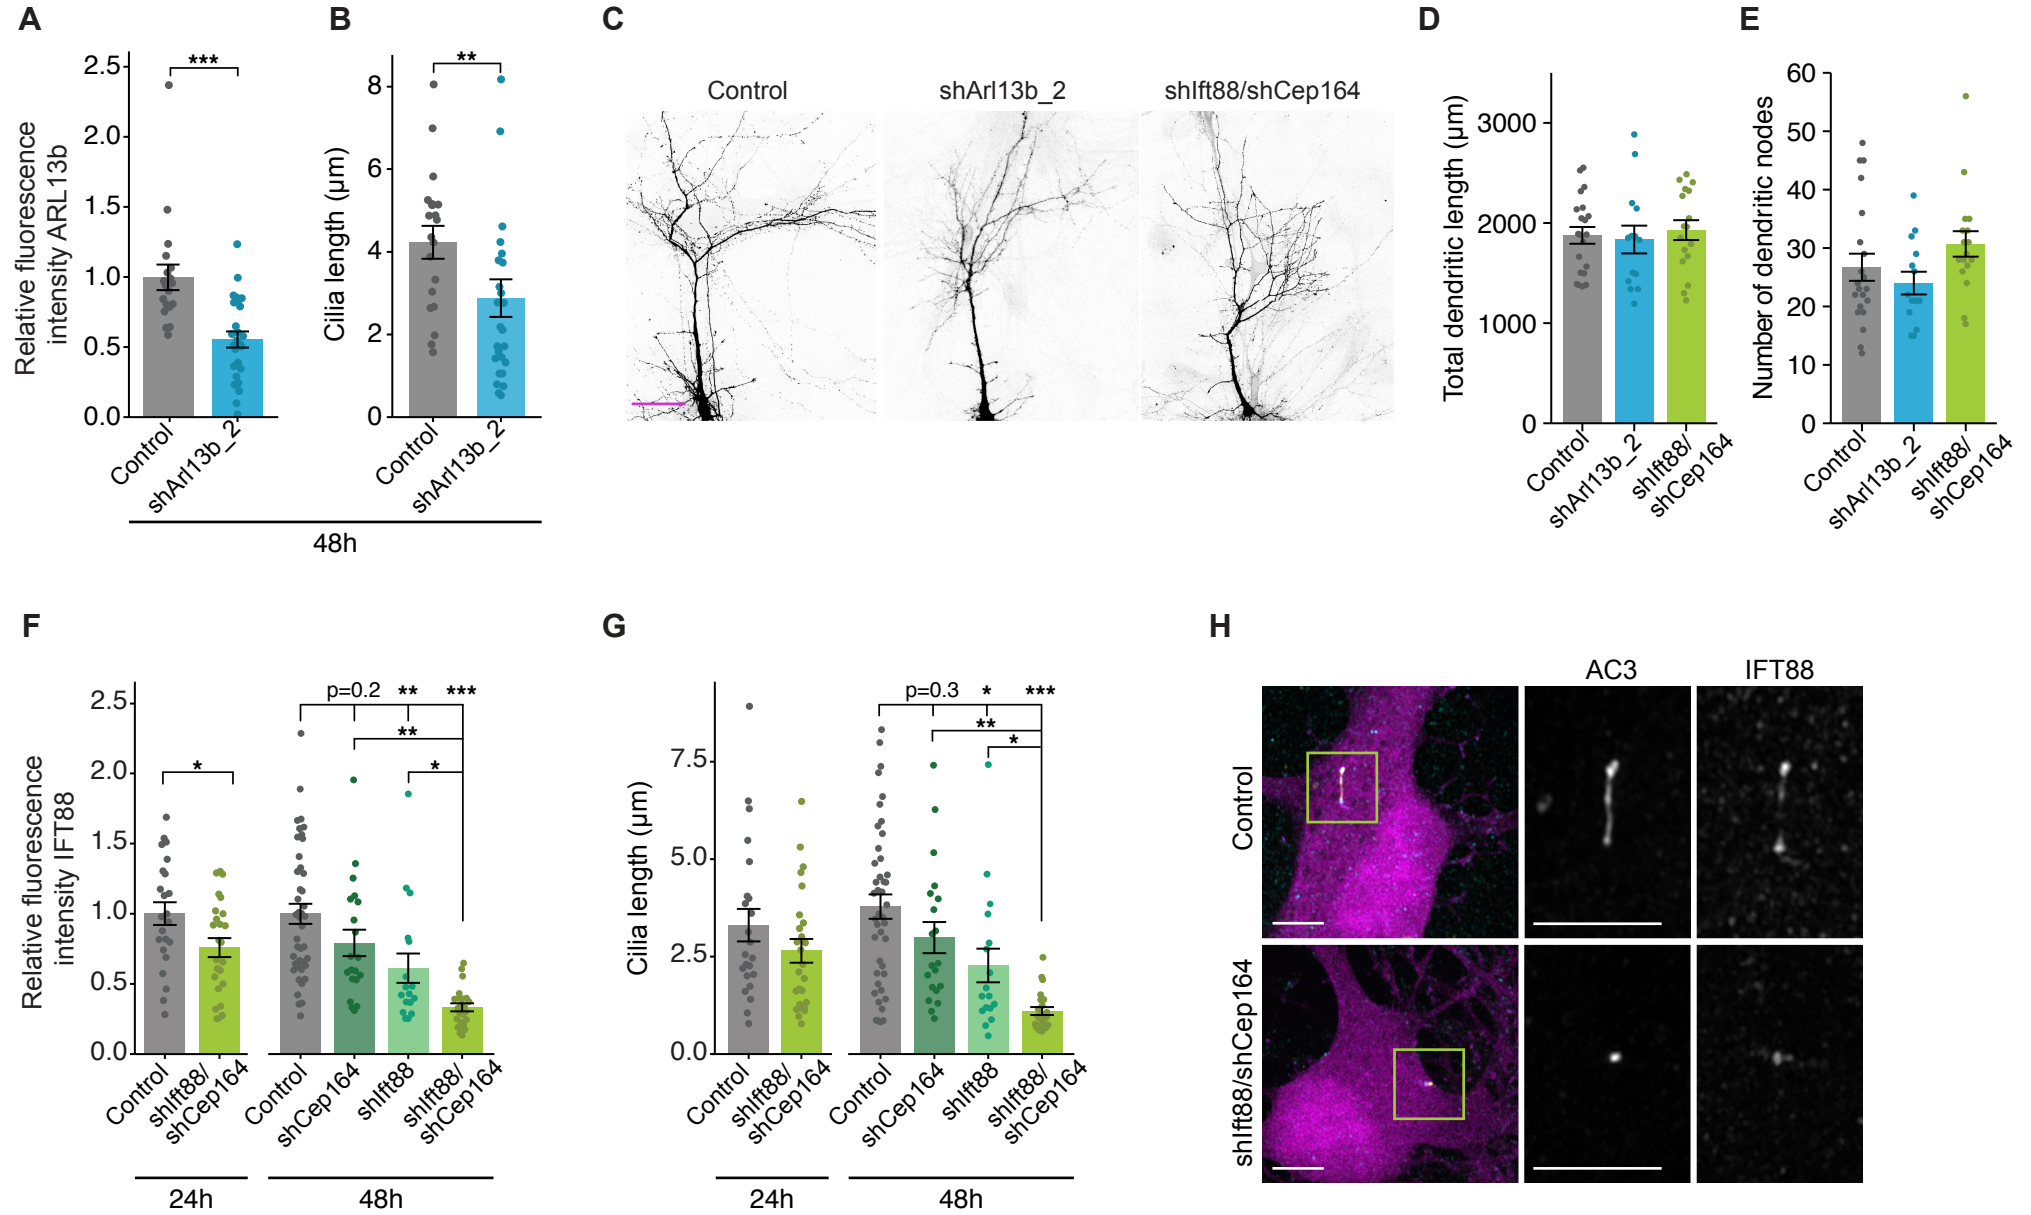

Supplement: supp [file elife-65427-supp-v1.zip]

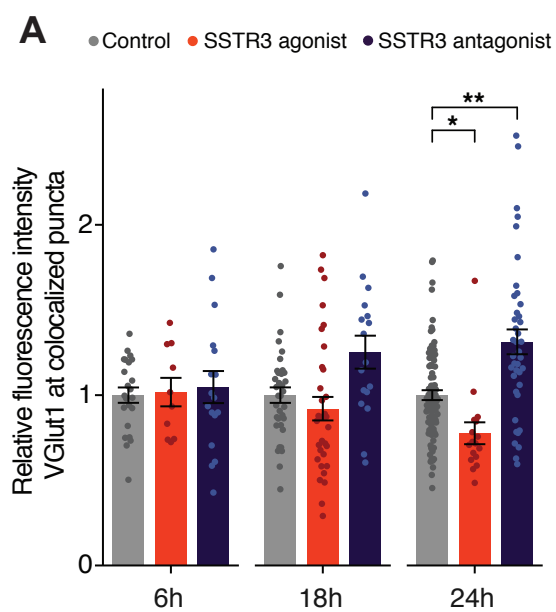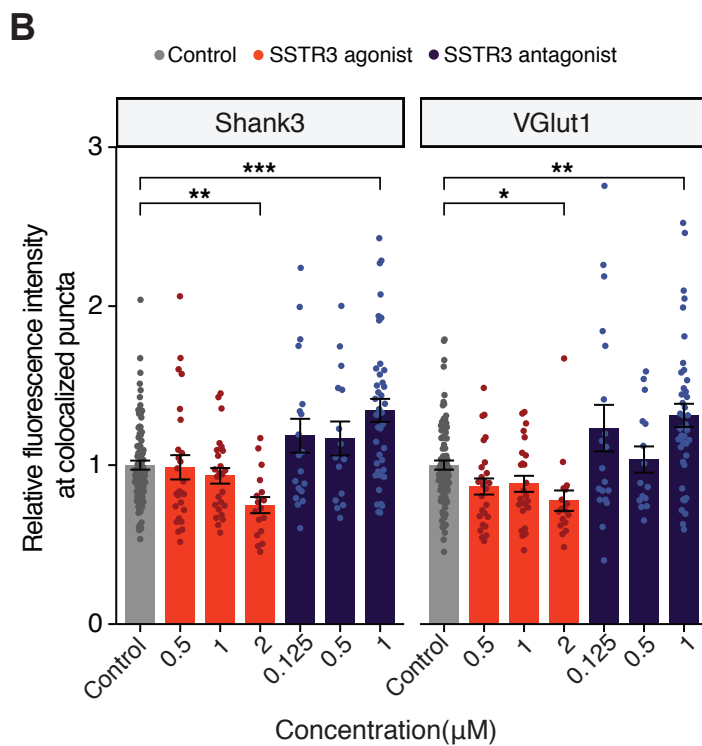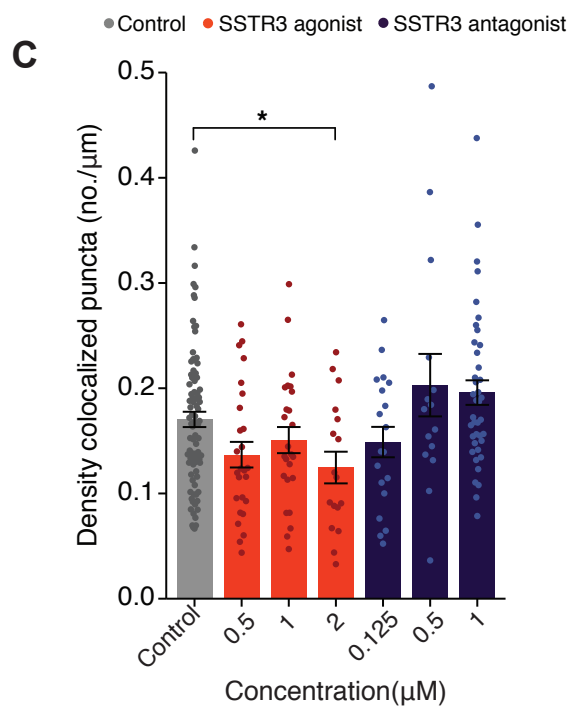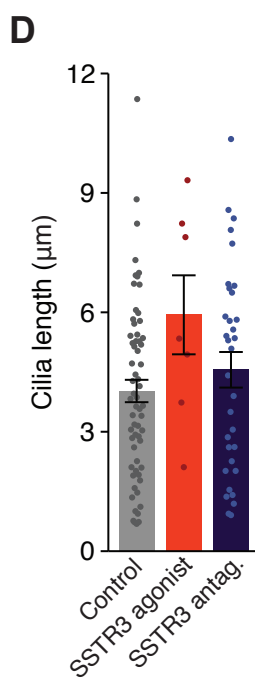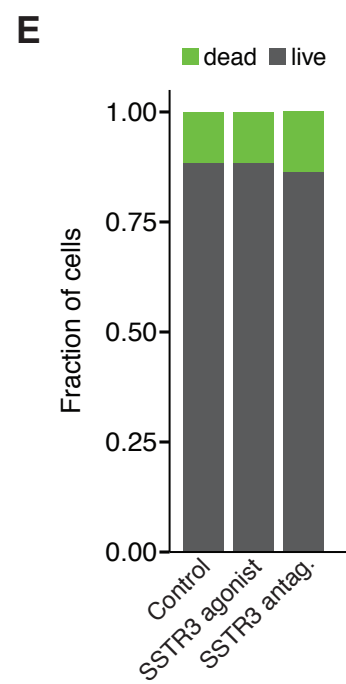

Supplement: supp [file elife-65427-supp-v1.zip]

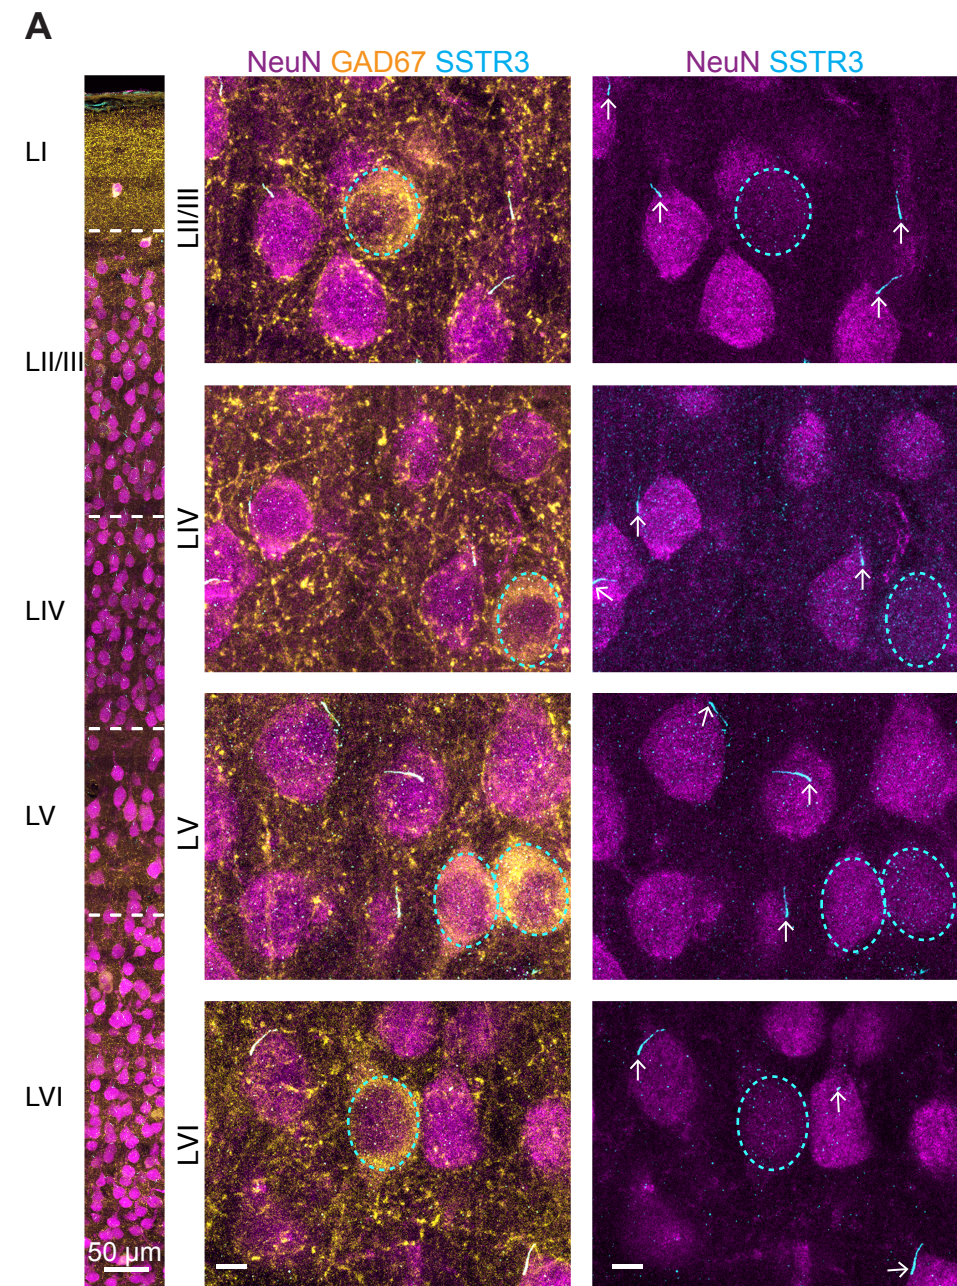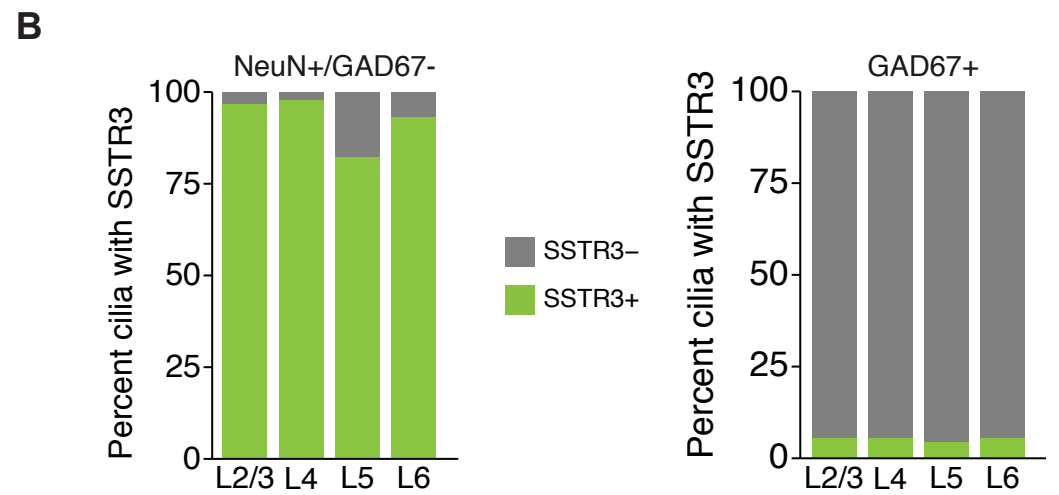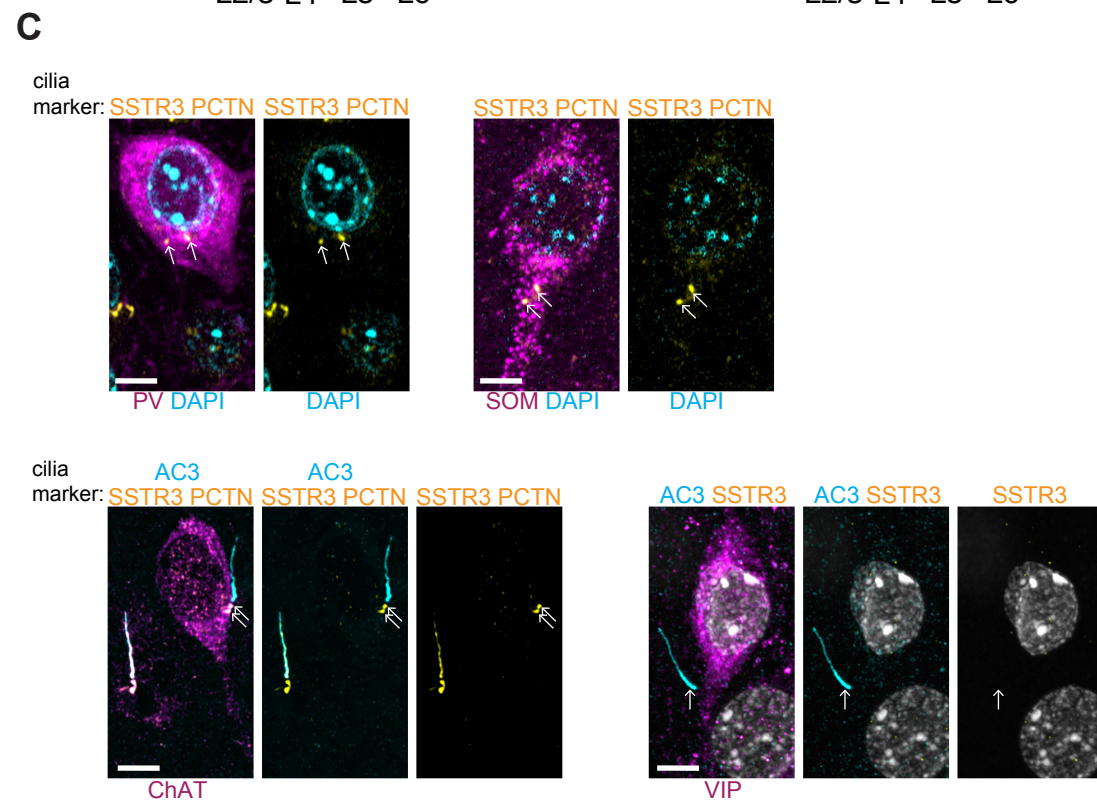

Supplement: supp [file elife-65427-supp-v1.zip]
